# Supplementary material for: Pseudomonas aeruginosa urinary tract infections in hospitalized patients: Mortality and prognostic factors
Source: PubMed Central journal article supplement (PMC5446154; doi:10.1371/journal.pone.0178178), 2017-05-26

# SURVIVAL ANALYSIS (KAPLAN-MEIER CURVES AND LOG-RANK TEST)

## CARBAPENEM RESISTANT (0=NO, 1=YES)

Case Processing Summary

| Carbapenem Resistant | Total N | N of Events | Censored |         |
|----------------------|---------|-------------|----------|---------|
|                      |         |             | N        | Percent |
| ,0                   | 50      | 9           | 41       | 82,0%   |
| 1,0                  | 12      | 2           | 10       | 83,3%   |
| Overall              | 62      | 11          | 51       | 82,3%   |

Survival Table

| Carbapenem Resistant | Time | Status | Cumulative Proportion Surviving at the Time |            | N of Cumulative Events | N of Remaining Cases |    |
|----------------------|------|--------|---------------------------------------------|------------|------------------------|----------------------|----|
|                      |      |        | Estimate                                    | Std. Error |                        |                      |    |
| ,0                   | 1    | 5,000  | 1,00                                        | ,980       | ,020                   | 1                    | 49 |
|                      | 2    | 7,000  | 1,00                                        | .          | .                      | 2                    | 48 |
|                      | 3    | 7,000  | 1,00                                        | ,940       | ,034                   | 3                    | 47 |
|                      | 4    | 8,000  | 1,00                                        | ,920       | ,038                   | 4                    | 46 |
|                      | 5    | 10,000 | 1,00                                        | ,900       | ,042                   | 5                    | 45 |
|                      | 6    | 16,000 | 1,00                                        | ,880       | ,046                   | 6                    | 44 |
|                      | 7    | 22,000 | 1,00                                        | ,860       | ,049                   | 7                    | 43 |
|                      | 8    | 24,000 | 1,00                                        | ,840       | ,052                   | 8                    | 42 |
|                      | 9    | 28,000 | 1,00                                        | ,820       | ,054                   | 9                    | 41 |
|                      | 10   | 30,000 | ,00                                         | .          | .                      | 9                    | 40 |
|                      | 11   | 30,000 | ,00                                         | .          | .                      | 9                    | 39 |
|                      | 12   | 30,000 | ,00                                         | .          | .                      | 9                    | 38 |
|                      | 13   | 30,000 | ,00                                         | .          | .                      | 9                    | 37 |
|                      | 14   | 30,000 | ,00                                         | .          | .                      | 9                    | 36 |
|                      | 15   | 30,000 | ,00                                         | .          | .                      | 9                    | 35 |
|                      | 16   | 30,000 | ,00                                         | .          | .                      | 9                    | 34 |
|                      | 17   | 30,000 | ,00                                         | .          | .                      | 9                    | 33 |
|                      | 18   | 30,000 | ,00                                         | .          | .                      | 9                    | 32 |
|                      | 19   | 30,000 | ,00                                         | .          | .                      | 9                    | 31 |
|                      | 20   | 30,000 | ,00                                         | .          | .                      | 9                    | 30 |
|                      | 21   | 30,000 | ,00                                         | .          | .                      | 9                    | 29 |
|                      | 22   | 30,000 | ,00                                         | .          | .                      | 9                    | 28 |
|                      | 23   | 30,000 | ,00                                         | .          | .                      | 9                    | 27 |
|                      | 24   | 30,000 | ,00                                         | .          | .                      | 9                    | 26 |
|                      | 25   | 30,000 | ,00                                         | .          | .                      | 9                    | 25 |
|                      | 26   | 30,000 | ,00                                         | .          | .                      | 9                    | 24 |
|                      | 27   | 30,000 | ,00                                         | .          | .                      | 9                    | 23 |
|                      | 28   | 30,000 | ,00                                         | .          | .                      | 9                    | 22 |
|                      | 29   | 30,000 | ,00                                         | .          | .                      | 9                    | 21 |
|                      | 30   | 30,000 | ,00                                         | .          | .                      | 9                    | 20 |
|                      | 31   | 30,000 | ,00                                         | .          | .                      | 9                    | 19 |
|                      | 32   | 30,000 | ,00                                         | .          | .                      | 9                    | 18 |
|                      | 33   | 30,000 | ,00                                         | .          | .                      | 9                    | 17 |

Survival Table

| Carbapenem Resistant | Time   | Status | Cumulative Proportion Surviving at the Time |            | N of Cumulative Events | N of Remaining Cases |
|----------------------|--------|--------|---------------------------------------------|------------|------------------------|----------------------|
|                      |        |        | Estimate                                    | Std. Error |                        |                      |
| 34                   | 30,000 | ,00    | .                                           | .          | 9                      | 16                   |
| 35                   | 30,000 | ,00    | .                                           | .          | 9                      | 15                   |
| 36                   | 30,000 | ,00    | .                                           | .          | 9                      | 14                   |
| 37                   | 30,000 | ,00    | .                                           | .          | 9                      | 13                   |
| 38                   | 30,000 | ,00    | .                                           | .          | 9                      | 12                   |
| 39                   | 30,000 | ,00    | .                                           | .          | 9                      | 11                   |
| 40                   | 30,000 | ,00    | .                                           | .          | 9                      | 10                   |
| 41                   | 30,000 | ,00    | .                                           | .          | 9                      | 9                    |
| 42                   | 30,000 | ,00    | .                                           | .          | 9                      | 8                    |
| 43                   | 30,000 | ,00    | .                                           | .          | 9                      | 7                    |
| 44                   | 30,000 | ,00    | .                                           | .          | 9                      | 6                    |
| 45                   | 30,000 | ,00    | .                                           | .          | 9                      | 5                    |
| 46                   | 30,000 | ,00    | .                                           | .          | 9                      | 4                    |
| 47                   | 30,000 | ,00    | .                                           | .          | 9                      | 3                    |
| 48                   | 30,000 | ,00    | .                                           | .          | 9                      | 2                    |
| 49                   | 30,000 | ,00    | .                                           | .          | 9                      | 1                    |
| 50                   | 30,000 | ,00    | .                                           | .          | 9                      | 0                    |
| 1,0                  | 1      | 1,00   | ,917                                        | ,080       | 1                      | 11                   |
|                      | 2      | 16,000 | ,833                                        | ,108       | 2                      | 10                   |
|                      | 3      | 30,000 | .                                           | .          | 2                      | 9                    |
|                      | 4      | 30,000 | .                                           | .          | 2                      | 8                    |
|                      | 5      | 30,000 | .                                           | .          | 2                      | 7                    |
|                      | 6      | 30,000 | .                                           | .          | 2                      | 6                    |
|                      | 7      | 30,000 | .                                           | .          | 2                      | 5                    |
|                      | 8      | 30,000 | .                                           | .          | 2                      | 4                    |
|                      | 9      | 30,000 | .                                           | .          | 2                      | 3                    |
|                      | 10     | 30,000 | .                                           | .          | 2                      | 2                    |
|                      | 11     | 30,000 | .                                           | .          | 2                      | 1                    |
|                      | 12     | 30,000 | .                                           | .          | 2                      | 0                    |

Means and Medians for Survival Time

| Carbapenem Resistant | Mean <sup>a</sup> |            |                         |             | Median   |            |             |
|----------------------|-------------------|------------|-------------------------|-------------|----------|------------|-------------|
|                      | Estimate          | Std. Error | 95% Confidence Interval |             | Estimate | Std. Error | 95% ...     |
|                      |                   |            | Lower Bound             | Upper Bound |          |            | Lower Bound |
| ,0                   | 27,140            | ,992       | 25,197                  | 29,083      | .        | .          | .           |
| 1,0                  | 26,417            | 2,476      | 21,563                  | 31,270      | .        | .          | .           |
| Overall              | 27,000            | ,933       | 25,171                  | 28,829      | .        | .          | .           |

Means and Medians for Survival Time

| Carbapenem Resistant | Median      |
|----------------------|-------------|
|                      | 95% ...     |
|                      | Upper Bound |
| ,0                   | .           |
| 1,0                  | .           |
| Overall              | .           |

a. Estimation is limited to the largest survival time if it is censored.

Overall Comparisons

|                       | Chi-Square | df | Sig. |
|-----------------------|------------|----|------|
| Log Rank (Mantel-Cox) | ,004       | 1  | ,949 |

Test of equality of survival distributions for the different levels of Carbapenem Resistant

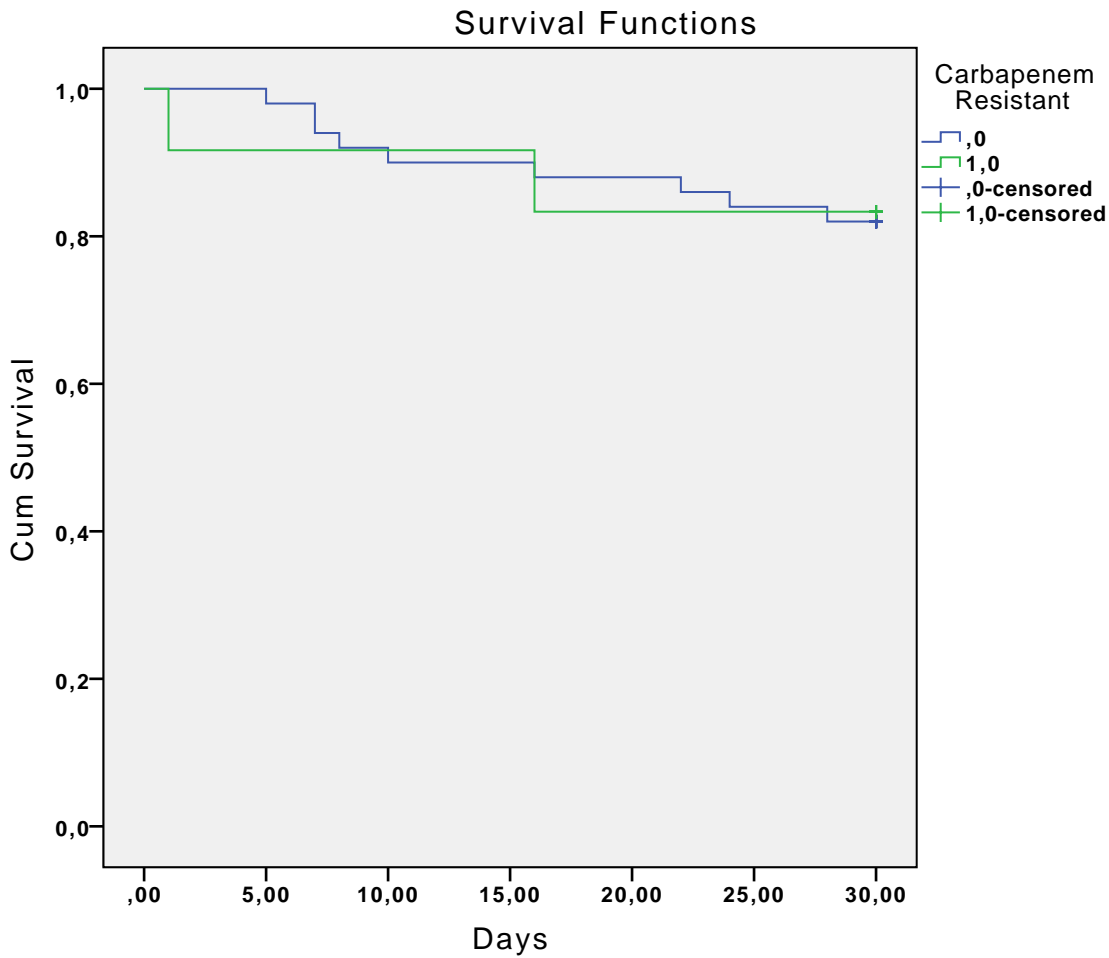

**MONOMICROBIAN CULTURE (0=NO, 1=YES)**

Case Processing Summary

| Monomicrobial Culture | Total N | N of Events | Censored |         |
|-----------------------|---------|-------------|----------|---------|
|                       |         |             | N        | Percent |
| ,00                   | 20      | 6           | 14       | 70,0%   |
| 1,00                  | 42      | 5           | 37       | 88,1%   |
| Overall               | 62      | 11          | 51       | 82,3%   |

Survival Table

| Cultivo Monomicrobiano | Time | Status | Cumulative Proportion Surviving at the Time |            | N of Cumulative Events | N of Remaining Cases |    |
|------------------------|------|--------|---------------------------------------------|------------|------------------------|----------------------|----|
|                        |      |        | Estimate                                    | Std. Error |                        |                      |    |
| ,00                    | 1    | 7,000  | 1,00                                        | .          | .                      | 1                    | 19 |
|                        | 2    | 7,000  | 1,00                                        | ,900       | ,067                   | 2                    | 18 |
|                        | 3    | 8,000  | 1,00                                        | ,850       | ,080                   | 3                    | 17 |
|                        | 4    | 10,000 | 1,00                                        | ,800       | ,089                   | 4                    | 16 |
|                        | 5    | 16,000 | 1,00                                        | ,750       | ,097                   | 5                    | 15 |
|                        | 6    | 24,000 | 1,00                                        | ,700       | ,102                   | 6                    | 14 |
|                        | 7    | 30,000 | ,00                                         | .          | .                      | 6                    | 13 |
|                        | 8    | 30,000 | ,00                                         | .          | .                      | 6                    | 12 |
|                        | 9    | 30,000 | ,00                                         | .          | .                      | 6                    | 11 |
|                        | 10   | 30,000 | ,00                                         | .          | .                      | 6                    | 10 |
|                        | 11   | 30,000 | ,00                                         | .          | .                      | 6                    | 9  |
|                        | 12   | 30,000 | ,00                                         | .          | .                      | 6                    | 8  |
|                        | 13   | 30,000 | ,00                                         | .          | .                      | 6                    | 7  |
|                        | 14   | 30,000 | ,00                                         | .          | .                      | 6                    | 6  |
|                        | 15   | 30,000 | ,00                                         | .          | .                      | 6                    | 5  |
|                        | 16   | 30,000 | ,00                                         | .          | .                      | 6                    | 4  |
|                        | 17   | 30,000 | ,00                                         | .          | .                      | 6                    | 3  |
|                        | 18   | 30,000 | ,00                                         | .          | .                      | 6                    | 2  |
|                        | 19   | 30,000 | ,00                                         | .          | .                      | 6                    | 1  |
|                        | 20   | 30,000 | ,00                                         | .          | .                      | 6                    | 0  |
| 1,00                   | 1    | 1,000  | 1,00                                        | ,976       | ,024                   | 1                    | 41 |
|                        | 2    | 5,000  | 1,00                                        | ,952       | ,033                   | 2                    | 40 |
|                        | 3    | 16,000 | 1,00                                        | ,929       | ,040                   | 3                    | 39 |
|                        | 4    | 22,000 | 1,00                                        | ,905       | ,045                   | 4                    | 38 |
|                        | 5    | 28,000 | 1,00                                        | ,881       | ,050                   | 5                    | 37 |
|                        | 6    | 30,000 | ,00                                         | .          | .                      | 5                    | 36 |
|                        | 7    | 30,000 | ,00                                         | .          | .                      | 5                    | 35 |
|                        | 8    | 30,000 | ,00                                         | .          | .                      | 5                    | 34 |
|                        | 9    | 30,000 | ,00                                         | .          | .                      | 5                    | 33 |
|                        | 10   | 30,000 | ,00                                         | .          | .                      | 5                    | 32 |
|                        | 11   | 30,000 | ,00                                         | .          | .                      | 5                    | 31 |
|                        | 12   | 30,000 | ,00                                         | .          | .                      | 5                    | 30 |
|                        | 13   | 30,000 | ,00                                         | .          | .                      | 5                    | 29 |
|                        | 14   | 30,000 | ,00                                         | .          | .                      | 5                    | 28 |
|                        | 15   | 30,000 | ,00                                         | .          | .                      | 5                    | 27 |
|                        | 16   | 30,000 | ,00                                         | .          | .                      | 5                    | 26 |
|                        | 17   | 30,000 | ,00                                         | .          | .                      | 5                    | 25 |
|                        | 18   | 30,000 | ,00                                         | .          | .                      | 5                    | 24 |
|                        | 19   | 30,000 | ,00                                         | .          | .                      | 5                    | 23 |
|                        | 20   | 30,000 | ,00                                         | .          | .                      | 5                    | 22 |
|                        | 21   | 30,000 | ,00                                         | .          | .                      | 5                    | 21 |
|                        | 22   | 30,000 | ,00                                         | .          | .                      | 5                    | 20 |
|                        | 23   | 30,000 | ,00                                         | .          | .                      | 5                    | 19 |
|                        | 24   | 30,000 | ,00                                         | .          | .                      | 5                    | 18 |
|                        | 25   | 30,000 | ,00                                         | .          | .                      | 5                    | 17 |
|                        | 26   | 30,000 | ,00                                         | .          | .                      | 5                    | 16 |
|                        | 27   | 30,000 | ,00                                         | .          | .                      | 5                    | 15 |
|                        | 28   | 30,000 | ,00                                         | .          | .                      | 5                    | 14 |
|                        | 29   | 30,000 | ,00                                         | .          | .                      | 5                    | 13 |

Survival Table

| Cultivo Monomicrobiano | Time   | Status | Cumulative Proportion Surviving at the Time |            | N of Cumulative Events | N of Remaining Cases |
|------------------------|--------|--------|---------------------------------------------|------------|------------------------|----------------------|
|                        |        |        | Estimate                                    | Std. Error |                        |                      |
| 30                     | 30,000 | ,00    | .                                           | .          | 5                      | 12                   |
| 31                     | 30,000 | ,00    | .                                           | .          | 5                      | 11                   |
| 32                     | 30,000 | ,00    | .                                           | .          | 5                      | 10                   |
| 33                     | 30,000 | ,00    | .                                           | .          | 5                      | 9                    |
| 34                     | 30,000 | ,00    | .                                           | .          | 5                      | 8                    |
| 35                     | 30,000 | ,00    | .                                           | .          | 5                      | 7                    |
| 36                     | 30,000 | ,00    | .                                           | .          | 5                      | 6                    |
| 37                     | 30,000 | ,00    | .                                           | .          | 5                      | 5                    |
| 38                     | 30,000 | ,00    | .                                           | .          | 5                      | 4                    |
| 39                     | 30,000 | ,00    | .                                           | .          | 5                      | 3                    |
| 40                     | 30,000 | ,00    | .                                           | .          | 5                      | 2                    |
| 41                     | 30,000 | ,00    | .                                           | .          | 5                      | 1                    |
| 42                     | 30,000 | ,00    | .                                           | .          | 5                      | 0                    |

Means and Medians for Survival Time

| Monomicrobian Culture | Mean <sup>a</sup> |            |                         |             | Median   |            |             |
|-----------------------|-------------------|------------|-------------------------|-------------|----------|------------|-------------|
|                       | Estimate          | Std. Error | 95% Confidence Interval |             | Estimate | Std. Error | 95% ...     |
|                       |                   |            | Lower Bound             | Upper Bound |          |            | Lower Bound |
| ,00                   | 24,600            | 1,994      | 20,691                  | 28,509      | .        | .          | .           |
| 1,00                  | 28,143            | ,948       | 26,285                  | 30,001      | .        | .          | .           |
| Overall               | 27,000            | ,933       | 25,171                  | 28,829      | .        | .          | .           |

Means and Medians for Survival Time

| Monomicrobian Culture | Median      |
|-----------------------|-------------|
|                       | 95% ...     |
|                       | Upper Bound |
| ,00                   | .           |
| 1,00                  | .           |
| Overall               | .           |

a. Estimation is limited to the largest survival time if it is censored.

Overall Comparisons

|                       | Chi-Square | df | Sig. |
|-----------------------|------------|----|------|
| Log Rank (Mantel-Cox) | 3,106      | 1  | ,078 |

Test of equality of survival distributions for the different levels of Monomicrobian Culture

### Survival Functions

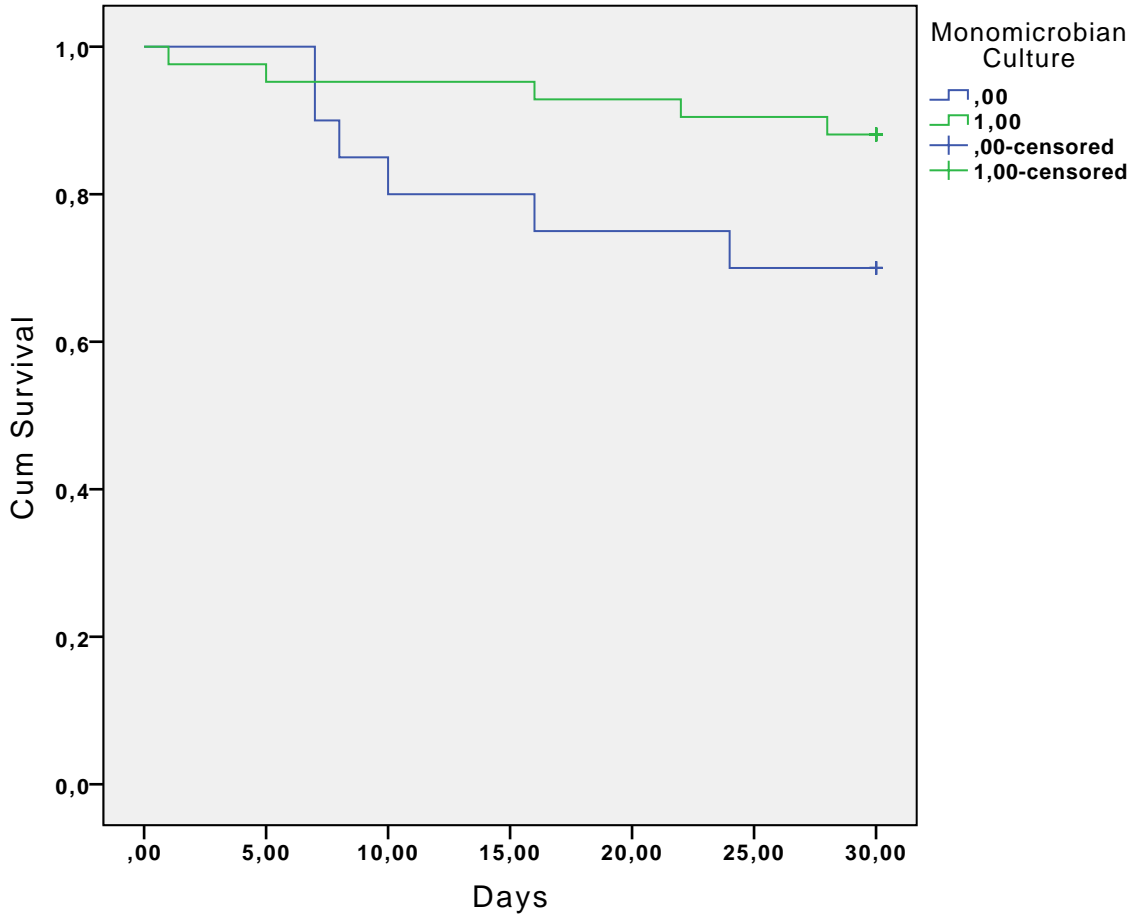

### ADEQUATED EMPIRICAL ANTIBIOTIC TREATMENT (0=NO, 1=YES)

Case Processing Summary

| Adequated Empirical Antibiotic Treatment | Total N | N of Events | Censored |         |
|------------------------------------------|---------|-------------|----------|---------|
|                                          |         |             | N        | Percent |
| ,0                                       | 38      | 7           | 31       | 81,6%   |
| 1,0                                      | 15      | 3           | 12       | 80,0%   |
| Overall                                  | 53      | 10          | 43       | 81,1%   |

Survival Table

| Adequated Empirical Antibiotic Treatment | Time | Status | Cumulative Proportion Surviving at the Time |            | N of Cumulative Events |
|------------------------------------------|------|--------|---------------------------------------------|------------|------------------------|
|                                          |      |        | Estimate                                    | Std. Error |                        |
| ,0                                       | 1    | 1,00   | ,974                                        | ,026       | 1                      |
|                                          | 2    | 1,00   | ,947                                        | ,036       | 2                      |
|                                          | 3    | 1,00   | ,921                                        | ,044       | 3                      |
|                                          | 4    | 1,00   | ,895                                        | ,050       | 4                      |
|                                          | 5    | 1,00   | ,868                                        | ,055       | 5                      |
|                                          | 6    | 1,00   | ,842                                        | ,059       | 6                      |
|                                          | 7    | 1,00   | ,816                                        | ,063       | 7                      |
|                                          | 8    | ,00    | .                                           | .          | 7                      |
|                                          | 9    | ,00    | .                                           | .          | 7                      |
|                                          | 10   | ,00    | .                                           | .          | 7                      |
|                                          | 11   | ,00    | .                                           | .          | 7                      |
|                                          | 12   | ,00    | .                                           | .          | 7                      |
|                                          | 13   | ,00    | .                                           | .          | 7                      |
|                                          | 14   | ,00    | .                                           | .          | 7                      |
|                                          | 15   | ,00    | .                                           | .          | 7                      |
|                                          | 16   | ,00    | .                                           | .          | 7                      |
|                                          | 17   | ,00    | .                                           | .          | 7                      |
|                                          | 18   | ,00    | .                                           | .          | 7                      |
|                                          | 19   | ,00    | .                                           | .          | 7                      |
|                                          | 20   | ,00    | .                                           | .          | 7                      |
|                                          | 21   | ,00    | .                                           | .          | 7                      |
|                                          | 22   | ,00    | .                                           | .          | 7                      |
|                                          | 23   | ,00    | .                                           | .          | 7                      |
|                                          | 24   | ,00    | .                                           | .          | 7                      |
|                                          | 25   | ,00    | .                                           | .          | 7                      |
|                                          | 26   | ,00    | .                                           | .          | 7                      |
|                                          | 27   | ,00    | .                                           | .          | 7                      |
|                                          | 28   | ,00    | .                                           | .          | 7                      |
|                                          | 29   | ,00    | .                                           | .          | 7                      |
|                                          | 30   | ,00    | .                                           | .          | 7                      |
|                                          | 31   | ,00    | .                                           | .          | 7                      |
|                                          | 32   | ,00    | .                                           | .          | 7                      |
|                                          | 33   | ,00    | .                                           | .          | 7                      |
|                                          | 34   | ,00    | .                                           | .          | 7                      |
|                                          | 35   | ,00    | .                                           | .          | 7                      |
|                                          | 36   | ,00    | .                                           | .          | 7                      |
|                                          | 37   | ,00    | .                                           | .          | 7                      |
|                                          | 38   | ,00    | .                                           | .          | 7                      |
| 1,0                                      | 1    | 1,00   | ,933                                        | ,064       | 1                      |
|                                          | 2    | 1,00   | ,867                                        | ,088       | 2                      |
|                                          | 3    | 1,00   | ,800                                        | ,103       | 3                      |
|                                          | 4    | ,00    | .                                           | .          | 3                      |
|                                          | 5    | ,00    | .                                           | .          | 3                      |
|                                          | 6    | ,00    | .                                           | .          | 3                      |
|                                          | 7    | ,00    | .                                           | .          | 3                      |
|                                          | 8    | ,00    | .                                           | .          | 3                      |
|                                          | 9    | ,00    | .                                           | .          | 3                      |
|                                          | 10   | ,00    | .                                           | .          | 3                      |
|                                          | 11   | ,00    | .                                           | .          | 3                      |

Survival Table

|                                                      | N of Remaining Cases                                                                                                                                                                                                   |
|------------------------------------------------------|------------------------------------------------------------------------------------------------------------------------------------------------------------------------------------------------------------------------|
| <b>Adequated Empirical Antibiotic Treatment</b><br>0 | 37<br>36<br>35<br>34<br>33<br>32<br>31<br>30<br>29<br>28<br>27<br>26<br>25<br>24<br>23<br>22<br>21<br>20<br>19<br>18<br>17<br>16<br>15<br>14<br>13<br>12<br>11<br>10<br>9<br>8<br>7<br>6<br>5<br>4<br>3<br>2<br>1<br>0 |
| 1,0                                                  | 14<br>13<br>12<br>11<br>10<br>9<br>8<br>7<br>6<br>5<br>4                                                                                                                                                               |



Survival Table

| Adequated Empirical Antibiotic Treatment | Time   | Status | Cumulative Proportion Surviving at the Time |            | N of Cumulative Events |
|------------------------------------------|--------|--------|---------------------------------------------|------------|------------------------|
|                                          |        |        | Estimate                                    | Std. Error |                        |
| 12                                       | 30,000 | ,00    | .                                           | .          | 3                      |
| 13                                       | 30,000 | ,00    | .                                           | .          | 3                      |
| 14                                       | 30,000 | ,00    | .                                           | .          | 3                      |
| 15                                       | 30,000 | ,00    | .                                           | .          | 3                      |

Survival Table

| Adequated Empirical Antibiotic Treatment | N of Remaining Cases |
|------------------------------------------|----------------------|
| 12                                       | 3                    |
| 13                                       | 2                    |
| 14                                       | 1                    |
| 15                                       | 0                    |

Means and Medians for Survival Time

| Adequated Empirical Antibiotic Treatment | Mean <sup>a</sup> |            |                         |             | Median   |            |             |
|------------------------------------------|-------------------|------------|-------------------------|-------------|----------|------------|-------------|
|                                          | Estimate          | Std. Error | 95% Confidence Interval |             | Estimate | Std. Error | 95% ...     |
|                                          |                   |            | Lower Bound             | Upper Bound |          |            | Lower Bound |
| ,0                                       | 26,816            | 1,270      | 24,326                  | 29,305      | .        | .          | .           |
| 1,0                                      | 26,600            | 1,909      | 22,859                  | 30,341      | .        | .          | .           |
| Overall                                  | 26,755            | 1,059      | 24,679                  | 28,830      | .        | .          | .           |

Means and Medians for Survival Time

| Adequated Empirical Antibiotic Treatment | Median      |
|------------------------------------------|-------------|
|                                          | 95% ...     |
|                                          | Upper Bound |
| ,0                                       | .           |
| 1,0                                      | .           |
| Overall                                  | .           |

a. Estimation is limited to the largest survival time if it is censored.

Overall Comparisons

|                       | Chi-Square | df | Sig. |
|-----------------------|------------|----|------|
| Log Rank (Mantel-Cox) | ,013       | 1  | ,908 |

Test of equality of survival distributions for the different levels of Adequated Empirical Antibiotic Treatment

### Survival Functions

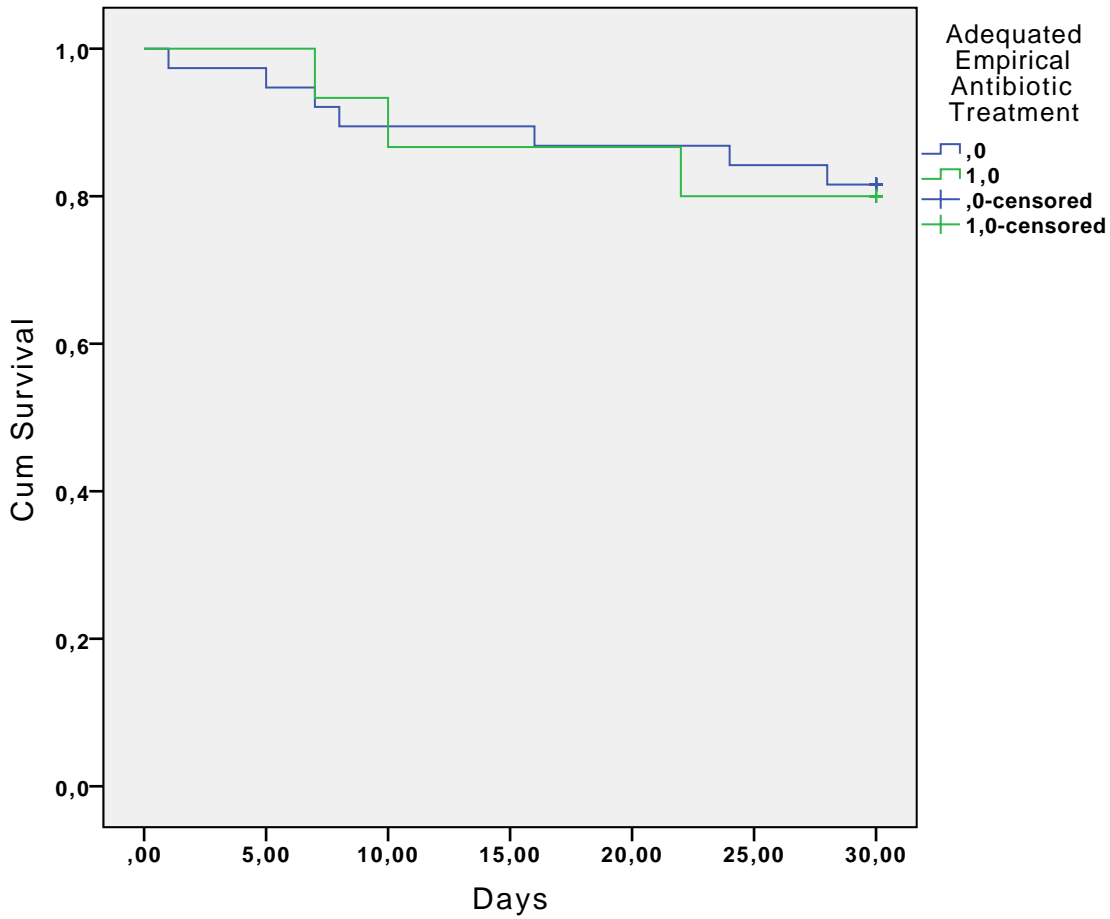

### FEMALE SEX (0=NO, 1=YES)

#### Case Processing Summary

| Female Sex | Total N | N of Events | Censored |         |
|------------|---------|-------------|----------|---------|
|            |         |             | N        | Percent |
| ,0         | 32      | 6           | 26       | 81,3%   |
| 1,0        | 30      | 5           | 25       | 83,3%   |
| Overall    | 62      | 11          | 51       | 82,3%   |

Survival Table

| Female Sex | Time | Status | Cumulative Proportion Surviving at the Time |            | N of Cumulative Events | N of Remaining Cases |
|------------|------|--------|---------------------------------------------|------------|------------------------|----------------------|
|            |      |        | Estimate                                    | Std. Error |                        |                      |
| ,0         | 1    | 1,00   | ,969                                        | ,031       | 1                      | 31                   |
|            | 2    | 1,00   | ,938                                        | ,043       | 2                      | 30                   |
|            | 3    | 1,00   | .                                           | .          | 3                      | 29                   |
|            | 4    | 1,00   | ,875                                        | ,058       | 4                      | 28                   |
|            | 5    | 1,00   | ,844                                        | ,064       | 5                      | 27                   |
|            | 6    | 1,00   | ,813                                        | ,069       | 6                      | 26                   |
|            | 7    | ,00    | .                                           | .          | 6                      | 25                   |
|            | 8    | ,00    | .                                           | .          | 6                      | 24                   |
|            | 9    | ,00    | .                                           | .          | 6                      | 23                   |
|            | 10   | ,00    | .                                           | .          | 6                      | 22                   |
|            | 11   | ,00    | .                                           | .          | 6                      | 21                   |
|            | 12   | ,00    | .                                           | .          | 6                      | 20                   |
|            | 13   | ,00    | .                                           | .          | 6                      | 19                   |
|            | 14   | ,00    | .                                           | .          | 6                      | 18                   |
|            | 15   | ,00    | .                                           | .          | 6                      | 17                   |
|            | 16   | ,00    | .                                           | .          | 6                      | 16                   |
|            | 17   | ,00    | .                                           | .          | 6                      | 15                   |
|            | 18   | ,00    | .                                           | .          | 6                      | 14                   |
|            | 19   | ,00    | .                                           | .          | 6                      | 13                   |
|            | 20   | ,00    | .                                           | .          | 6                      | 12                   |
|            | 21   | ,00    | .                                           | .          | 6                      | 11                   |
|            | 22   | ,00    | .                                           | .          | 6                      | 10                   |
|            | 23   | ,00    | .                                           | .          | 6                      | 9                    |
|            | 24   | ,00    | .                                           | .          | 6                      | 8                    |
|            | 25   | ,00    | .                                           | .          | 6                      | 7                    |
|            | 26   | ,00    | .                                           | .          | 6                      | 6                    |
|            | 27   | ,00    | .                                           | .          | 6                      | 5                    |
|            | 28   | ,00    | .                                           | .          | 6                      | 4                    |
|            | 29   | ,00    | .                                           | .          | 6                      | 3                    |
|            | 30   | ,00    | .                                           | .          | 6                      | 2                    |
|            | 31   | ,00    | .                                           | .          | 6                      | 1                    |
|            | 32   | ,00    | .                                           | .          | 6                      | 0                    |
| 1,0        | 1    | 1,00   | ,967                                        | ,033       | 1                      | 29                   |
|            | 2    | 1,00   | .                                           | .          | 2                      | 28                   |
|            | 3    | 1,00   | ,900                                        | ,055       | 3                      | 27                   |
|            | 4    | 1,00   | ,867                                        | ,062       | 4                      | 26                   |
|            | 5    | 1,00   | ,833                                        | ,068       | 5                      | 25                   |
|            | 6    | ,00    | .                                           | .          | 5                      | 24                   |
|            | 7    | ,00    | .                                           | .          | 5                      | 23                   |
|            | 8    | ,00    | .                                           | .          | 5                      | 22                   |
|            | 9    | ,00    | .                                           | .          | 5                      | 21                   |
|            | 10   | ,00    | .                                           | .          | 5                      | 20                   |
|            | 11   | ,00    | .                                           | .          | 5                      | 19                   |
|            | 12   | ,00    | .                                           | .          | 5                      | 18                   |
|            | 13   | ,00    | .                                           | .          | 5                      | 17                   |
|            | 14   | ,00    | .                                           | .          | 5                      | 16                   |
|            | 15   | ,00    | .                                           | .          | 5                      | 15                   |
|            | 16   | ,00    | .                                           | .          | 5                      | 14                   |
|            | 17   | ,00    | .                                           | .          | 5                      | 13                   |

Survival Table

| Female Sex | Time   | Status | Cumulative Proportion Surviving at the Time |            | N of Cumulative Events | N of Remaining Cases |
|------------|--------|--------|---------------------------------------------|------------|------------------------|----------------------|
|            |        |        | Estimate                                    | Std. Error |                        |                      |
| 18         | 30,000 | ,00    | .                                           | .          | 5                      | 12                   |
| 19         | 30,000 | ,00    | .                                           | .          | 5                      | 11                   |
| 20         | 30,000 | ,00    | .                                           | .          | 5                      | 10                   |
| 21         | 30,000 | ,00    | .                                           | .          | 5                      | 9                    |
| 22         | 30,000 | ,00    | .                                           | .          | 5                      | 8                    |
| 23         | 30,000 | ,00    | .                                           | .          | 5                      | 7                    |
| 24         | 30,000 | ,00    | .                                           | .          | 5                      | 6                    |
| 25         | 30,000 | ,00    | .                                           | .          | 5                      | 5                    |
| 26         | 30,000 | ,00    | .                                           | .          | 5                      | 4                    |
| 27         | 30,000 | ,00    | .                                           | .          | 5                      | 3                    |
| 28         | 30,000 | ,00    | .                                           | .          | 5                      | 2                    |
| 29         | 30,000 | ,00    | .                                           | .          | 5                      | 1                    |
| 30         | 30,000 | ,00    | .                                           | .          | 5                      | 0                    |

Means and Medians for Survival Time

| Female Sex | Mean <sup>a</sup> |            |                         |             | Median   |            |                         |             |
|------------|-------------------|------------|-------------------------|-------------|----------|------------|-------------------------|-------------|
|            | Estimate          | Std. Error | 95% Confidence Interval |             | Estimate | Std. Error | 95% Confidence Interval |             |
|            |                   |            | Lower Bound             | Upper Bound |          |            | Lower Bound             | Upper Bound |
| ,0         | 27,344            | 1,189      | 25,014                  | 29,674      | .        | .          | .                       | .           |
| 1,0        | 26,633            | 1,450      | 23,792                  | 29,474      | .        | .          | .                       | .           |
| Overall    | 27,000            | ,933       | 25,171                  | 28,829      | .        | .          | .                       | .           |

a. Estimation is limited to the largest survival time if it is censored.

Overall Comparisons

|                       | Chi-Square | df | Sig. |
|-----------------------|------------|----|------|
| Log Rank (Mantel-Cox) | ,019       | 1  | ,891 |

Test of equality of survival distributions for the different levels of Female Sex

### Survival Functions

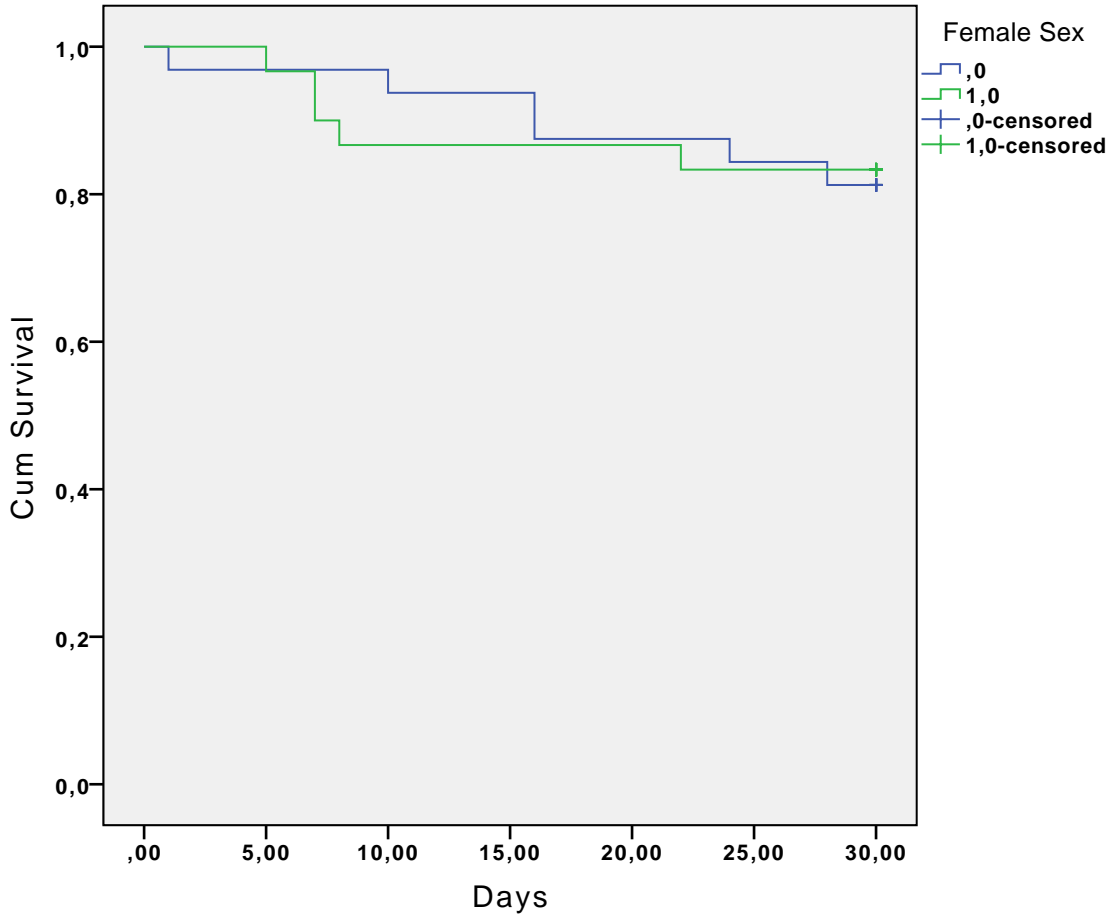

### MALNUTRITION (0=NO, 1=YES)

#### Case Processing Summary

| Malnutrition | Total N | N of Events | Censored |         |
|--------------|---------|-------------|----------|---------|
|              |         |             | N        | Percent |
| ,0           | 43      | 8           | 35       | 81,4%   |
| 1,0          | 12      | 3           | 9        | 75,0%   |
| Overall      | 55      | 11          | 44       | 80,0%   |

Survival Table

| Malnutrition | Time | Status | Cumulative Proportion Surviving at the Time |            | N of Cumulative Events | N of Remaining Cases |
|--------------|------|--------|---------------------------------------------|------------|------------------------|----------------------|
|              |      |        | Estimate                                    | Std. Error |                        |                      |
| ,0           | 1    | 1,00   | ,977                                        | ,023       | 1                      | 42                   |
|              | 2    | 1,00   | ,953                                        | ,032       | 2                      | 41                   |
|              | 3    | 1,00   | ,930                                        | ,039       | 3                      | 40                   |
|              | 4    | 1,00   | ,907                                        | ,044       | 4                      | 39                   |
|              | 5    | 1,00   | .                                           | .          | 5                      | 38                   |
|              | 6    | 1,00   | ,860                                        | ,053       | 6                      | 37                   |
|              | 7    | 1,00   | ,837                                        | ,056       | 7                      | 36                   |
|              | 8    | 1,00   | ,814                                        | ,059       | 8                      | 35                   |
|              | 9    | ,00    | .                                           | .          | 8                      | 34                   |
|              | 10   | ,00    | .                                           | .          | 8                      | 33                   |
|              | 11   | ,00    | .                                           | .          | 8                      | 32                   |
|              | 12   | ,00    | .                                           | .          | 8                      | 31                   |
|              | 13   | ,00    | .                                           | .          | 8                      | 30                   |
|              | 14   | ,00    | .                                           | .          | 8                      | 29                   |
|              | 15   | ,00    | .                                           | .          | 8                      | 28                   |
|              | 16   | ,00    | .                                           | .          | 8                      | 27                   |
|              | 17   | ,00    | .                                           | .          | 8                      | 26                   |
|              | 18   | ,00    | .                                           | .          | 8                      | 25                   |
|              | 19   | ,00    | .                                           | .          | 8                      | 24                   |
|              | 20   | ,00    | .                                           | .          | 8                      | 23                   |
|              | 21   | ,00    | .                                           | .          | 8                      | 22                   |
|              | 22   | ,00    | .                                           | .          | 8                      | 21                   |
|              | 23   | ,00    | .                                           | .          | 8                      | 20                   |
|              | 24   | ,00    | .                                           | .          | 8                      | 19                   |
|              | 25   | ,00    | .                                           | .          | 8                      | 18                   |
|              | 26   | ,00    | .                                           | .          | 8                      | 17                   |
|              | 27   | ,00    | .                                           | .          | 8                      | 16                   |
|              | 28   | ,00    | .                                           | .          | 8                      | 15                   |
|              | 29   | ,00    | .                                           | .          | 8                      | 14                   |
|              | 30   | ,00    | .                                           | .          | 8                      | 13                   |
|              | 31   | ,00    | .                                           | .          | 8                      | 12                   |
|              | 32   | ,00    | .                                           | .          | 8                      | 11                   |
|              | 33   | ,00    | .                                           | .          | 8                      | 10                   |
|              | 34   | ,00    | .                                           | .          | 8                      | 9                    |
|              | 35   | ,00    | .                                           | .          | 8                      | 8                    |
|              | 36   | ,00    | .                                           | .          | 8                      | 7                    |
|              | 37   | ,00    | .                                           | .          | 8                      | 6                    |
|              | 38   | ,00    | .                                           | .          | 8                      | 5                    |
|              | 39   | ,00    | .                                           | .          | 8                      | 4                    |
|              | 40   | ,00    | .                                           | .          | 8                      | 3                    |
|              | 41   | ,00    | .                                           | .          | 8                      | 2                    |
|              | 42   | ,00    | .                                           | .          | 8                      | 1                    |
|              | 43   | ,00    | .                                           | .          | 8                      | 0                    |
| 1,0          | 1    | 1,00   | ,917                                        | ,080       | 1                      | 11                   |
|              | 2    | 1,00   | ,833                                        | ,108       | 2                      | 10                   |
|              | 3    | 1,00   | ,750                                        | ,125       | 3                      | 9                    |
|              | 4    | ,00    | .                                           | .          | 3                      | 8                    |
|              | 5    | ,00    | .                                           | .          | 3                      | 7                    |
|              | 6    | ,00    | .                                           | .          | 3                      | 6                    |

Survival Table

| Malnutrition | Time   | Status | Cumulative Proportion Surviving at the Time |            | N of Cumulative Events | N of Remaining Cases |
|--------------|--------|--------|---------------------------------------------|------------|------------------------|----------------------|
|              |        |        | Estimate                                    | Std. Error |                        |                      |
| 7            | 30,000 | ,00    | .                                           | .          | 3                      | 5                    |
| 8            | 30,000 | ,00    | .                                           | .          | 3                      | 4                    |
| 9            | 30,000 | ,00    | .                                           | .          | 3                      | 3                    |
| 10           | 30,000 | ,00    | .                                           | .          | 3                      | 2                    |
| 11           | 30,000 | ,00    | .                                           | .          | 3                      | 1                    |
| 12           | 30,000 | ,00    | .                                           | .          | 3                      | 0                    |

Means and Medians for Survival Time

| Malnutrition | Mean <sup>a</sup> |            |                         |             | Median   |            |                         |             |
|--------------|-------------------|------------|-------------------------|-------------|----------|------------|-------------------------|-------------|
|              | Estimate          | Std. Error | 95% Confidence Interval |             | Estimate | Std. Error | 95% Confidence Interval |             |
|              |                   |            | Lower Bound             | Upper Bound |          |            | Lower Bound             | Upper Bound |
| ,0           | 26,977            | 1,114      | 24,794                  | 29,159      | .        | .          | .                       | .           |
| 1,0          | 25,333            | 2,578      | 20,281                  | 30,385      | .        | .          | .                       | .           |
| Overall      | 26,618            | 1,040      | 24,579                  | 28,658      | .        | .          | .                       | .           |

a. Estimation is limited to the largest survival time if it is censored.

Overall Comparisons

|                       | Chi-Square | df | Sig. |
|-----------------------|------------|----|------|
| Log Rank (Mantel-Cox) | ,300       | 1  | ,584 |

Test of equality of survival distributions for the different levels of Malnutrition

Survival Functions

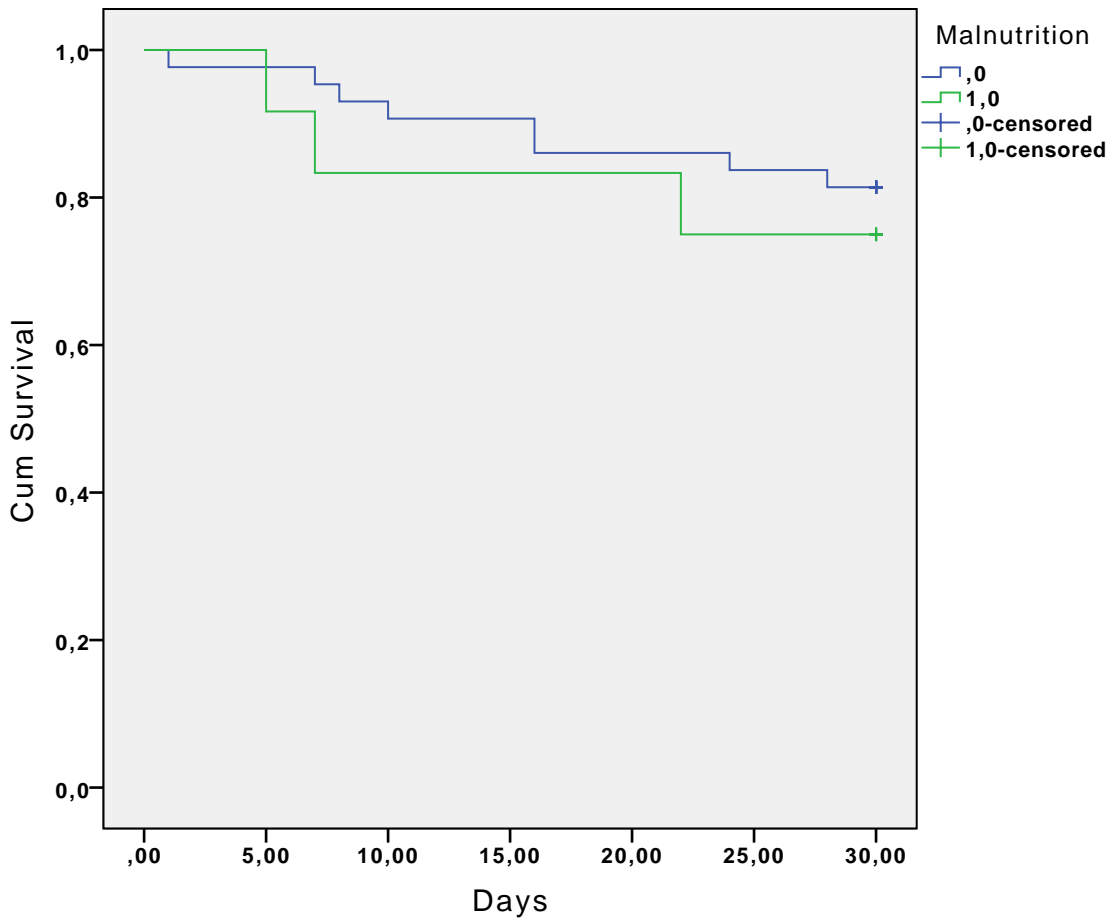

# OBESITY (0=NO, 1=YES)

## Case Processing Summary

| Obesity | Total N | N of Events | Censored |         |
|---------|---------|-------------|----------|---------|
|         |         |             | N        | Percent |
| ,0      | 39      | 7           | 32       | 82,1%   |
| 1,0     | 15      | 3           | 12       | 80,0%   |
| Overall | 54      | 10          | 44       | 81,5%   |

## Survival Table

| Obesity | Time | Status | Cumulative Proportion Surviving at the Time |            | N of Cumulative Events | N of Remaining Cases |
|---------|------|--------|---------------------------------------------|------------|------------------------|----------------------|
|         |      |        | Estimate                                    | Std. Error |                        |                      |
| ,0      | 1    | 1,00   | ,974                                        | ,025       | 1                      | 38                   |
|         | 2    | 1,00   | ,949                                        | ,035       | 2                      | 37                   |
|         | 3    | 1,00   | ,923                                        | ,043       | 3                      | 36                   |
|         | 4    | 1,00   | ,897                                        | ,049       | 4                      | 35                   |
|         | 5    | 1,00   | .                                           | .          | 5                      | 34                   |
|         | 6    | 1,00   | ,846                                        | ,058       | 6                      | 33                   |
|         | 7    | 1,00   | ,821                                        | ,061       | 7                      | 32                   |
|         | 8    | ,00    | .                                           | .          | 7                      | 31                   |
|         | 9    | ,00    | .                                           | .          | 7                      | 30                   |
|         | 10   | ,00    | .                                           | .          | 7                      | 29                   |
|         | 11   | ,00    | .                                           | .          | 7                      | 28                   |
|         | 12   | ,00    | .                                           | .          | 7                      | 27                   |
|         | 13   | ,00    | .                                           | .          | 7                      | 26                   |
|         | 14   | ,00    | .                                           | .          | 7                      | 25                   |
|         | 15   | ,00    | .                                           | .          | 7                      | 24                   |
|         | 16   | ,00    | .                                           | .          | 7                      | 23                   |
|         | 17   | ,00    | .                                           | .          | 7                      | 22                   |
|         | 18   | ,00    | .                                           | .          | 7                      | 21                   |
|         | 19   | ,00    | .                                           | .          | 7                      | 20                   |
|         | 20   | ,00    | .                                           | .          | 7                      | 19                   |
|         | 21   | ,00    | .                                           | .          | 7                      | 18                   |
|         | 22   | ,00    | .                                           | .          | 7                      | 17                   |
|         | 23   | ,00    | .                                           | .          | 7                      | 16                   |
|         | 24   | ,00    | .                                           | .          | 7                      | 15                   |
|         | 25   | ,00    | .                                           | .          | 7                      | 14                   |
|         | 26   | ,00    | .                                           | .          | 7                      | 13                   |
|         | 27   | ,00    | .                                           | .          | 7                      | 12                   |
|         | 28   | ,00    | .                                           | .          | 7                      | 11                   |
|         | 29   | ,00    | .                                           | .          | 7                      | 10                   |
|         | 30   | ,00    | .                                           | .          | 7                      | 9                    |
|         | 31   | ,00    | .                                           | .          | 7                      | 8                    |
|         | 32   | ,00    | .                                           | .          | 7                      | 7                    |
|         | 33   | ,00    | .                                           | .          | 7                      | 6                    |
|         | 34   | ,00    | .                                           | .          | 7                      | 5                    |
|         | 35   | ,00    | .                                           | .          | 7                      | 4                    |
|         | 36   | ,00    | .                                           | .          | 7                      | 3                    |
|         | 37   | ,00    | .                                           | .          | 7                      | 2                    |
|         | 38   | ,00    | .                                           | .          | 7                      | 1                    |
|         | 39   | ,00    | .                                           | .          | 7                      | 0                    |



Survival Table

| Obesity | Time | Status | Cumulative Proportion Surviving at the Time |            | N of Cumulative Events | N of Remaining Cases |    |
|---------|------|--------|---------------------------------------------|------------|------------------------|----------------------|----|
|         |      |        | Estimate                                    | Std. Error |                        |                      |    |
| 1,0     | 1    | 7,000  | 1,00                                        | ,933       | ,064                   | 1                    | 14 |
|         | 2    | 8,000  | 1,00                                        | ,867       | ,088                   | 2                    | 13 |
|         | 3    | 28,000 | 1,00                                        | ,800       | ,103                   | 3                    | 12 |
|         | 4    | 30,000 | ,00                                         | .          | .                      | 3                    | 11 |
|         | 5    | 30,000 | ,00                                         | .          | .                      | 3                    | 10 |
|         | 6    | 30,000 | ,00                                         | .          | .                      | 3                    | 9  |
|         | 7    | 30,000 | ,00                                         | .          | .                      | 3                    | 8  |
|         | 8    | 30,000 | ,00                                         | .          | .                      | 3                    | 7  |
|         | 9    | 30,000 | ,00                                         | .          | .                      | 3                    | 6  |
|         | 10   | 30,000 | ,00                                         | .          | .                      | 3                    | 5  |
|         | 11   | 30,000 | ,00                                         | .          | .                      | 3                    | 4  |
|         | 12   | 30,000 | ,00                                         | .          | .                      | 3                    | 3  |
|         | 13   | 30,000 | ,00                                         | .          | .                      | 3                    | 2  |
|         | 14   | 30,000 | ,00                                         | .          | .                      | 3                    | 1  |
|         | 15   | 30,000 | ,00                                         | .          | .                      | 3                    | 0  |

Means and Medians for Survival Time

| Obesity | Mean <sup>a</sup> |            |                         |             | Median   |            |                         |             |
|---------|-------------------|------------|-------------------------|-------------|----------|------------|-------------------------|-------------|
|         | Estimate          | Std. Error | 95% Confidence Interval |             | Estimate | Std. Error | 95% Confidence Interval |             |
|         |                   |            | Lower Bound             | Upper Bound |          |            | Lower Bound             | Upper Bound |
| ,0      | 26,590            | 1,255      | 24,129                  | 29,050      | .        | .          | .                       | .           |
| 1,0     | 26,867            | 1,966      | 23,013                  | 30,720      | .        | .          | .                       | .           |
| Overall | 26,667            | 1,059      | 24,592                  | 28,742      | .        | .          | .                       | .           |

a. Estimation is limited to the largest survival time if it is censored.

Overall Comparisons

|                       | Chi-Square | df | Sig. |
|-----------------------|------------|----|------|
| Log Rank (Mantel-Cox) | ,021       | 1  | ,885 |

Test of equality of survival distributions for the different levels of Obesity

### Survival Functions

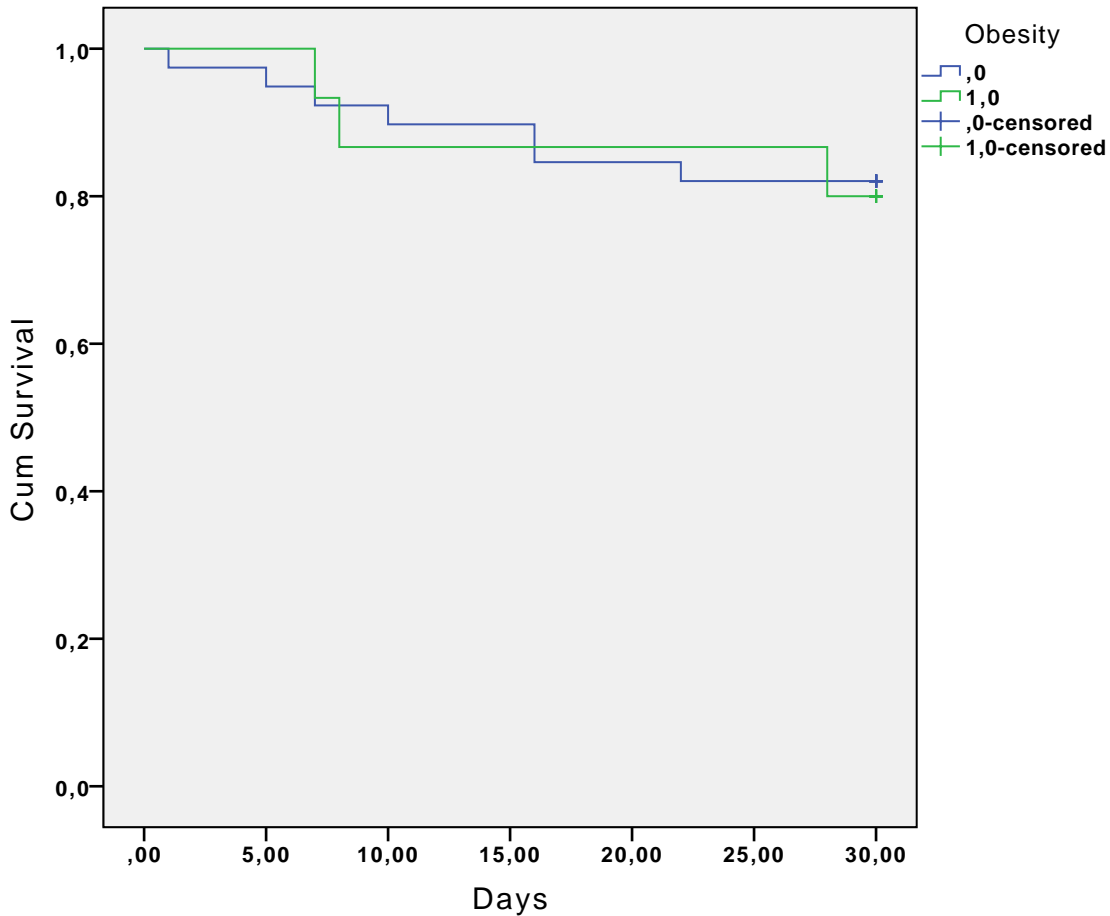

### INTENSIVE CARE UNIT (0=NO, 1=YES)

Case Processing Summary

| Intensive Care Unit | Total N | N of Events | Censored |         |
|---------------------|---------|-------------|----------|---------|
|                     |         |             | N        | Percent |
| ,0                  | 48      | 9           | 39       | 81,3%   |
| 1,0                 | 14      | 2           | 12       | 85,7%   |
| Overall             | 62      | 11          | 51       | 82,3%   |

Survival Table

| Intensive Care Unit | Time | Status | Cumulative Proportion Surviving at the Time |            | N of Cumulative Events | N of Remaining Cases |
|---------------------|------|--------|---------------------------------------------|------------|------------------------|----------------------|
|                     |      |        | Estimate                                    | Std. Error |                        |                      |
| ,0                  | 1    | 1,00   | ,979                                        | ,021       | 1                      | 47                   |
|                     | 2    | 1,00   | .                                           | .          | 2                      | 46                   |
|                     | 3    | 1,00   | ,938                                        | ,035       | 3                      | 45                   |
|                     | 4    | 1,00   | ,917                                        | ,040       | 4                      | 44                   |
|                     | 5    | 1,00   | ,896                                        | ,044       | 5                      | 43                   |
|                     | 6    | 1,00   | ,875                                        | ,048       | 6                      | 42                   |
|                     | 7    | 1,00   | ,854                                        | ,051       | 7                      | 41                   |
|                     | 8    | 1,00   | ,833                                        | ,054       | 8                      | 40                   |
|                     | 9    | 1,00   | ,813                                        | ,056       | 9                      | 39                   |
|                     | 10   | ,00    | .                                           | .          | 9                      | 38                   |
|                     | 11   | ,00    | .                                           | .          | 9                      | 37                   |
|                     | 12   | ,00    | .                                           | .          | 9                      | 36                   |
|                     | 13   | ,00    | .                                           | .          | 9                      | 35                   |
|                     | 14   | ,00    | .                                           | .          | 9                      | 34                   |
|                     | 15   | ,00    | .                                           | .          | 9                      | 33                   |
|                     | 16   | ,00    | .                                           | .          | 9                      | 32                   |
|                     | 17   | ,00    | .                                           | .          | 9                      | 31                   |
|                     | 18   | ,00    | .                                           | .          | 9                      | 30                   |
|                     | 19   | ,00    | .                                           | .          | 9                      | 29                   |
|                     | 20   | ,00    | .                                           | .          | 9                      | 28                   |
|                     | 21   | ,00    | .                                           | .          | 9                      | 27                   |
|                     | 22   | ,00    | .                                           | .          | 9                      | 26                   |
|                     | 23   | ,00    | .                                           | .          | 9                      | 25                   |
|                     | 24   | ,00    | .                                           | .          | 9                      | 24                   |
|                     | 25   | ,00    | .                                           | .          | 9                      | 23                   |
|                     | 26   | ,00    | .                                           | .          | 9                      | 22                   |
|                     | 27   | ,00    | .                                           | .          | 9                      | 21                   |
|                     | 28   | ,00    | .                                           | .          | 9                      | 20                   |
|                     | 29   | ,00    | .                                           | .          | 9                      | 19                   |
|                     | 30   | ,00    | .                                           | .          | 9                      | 18                   |
|                     | 31   | ,00    | .                                           | .          | 9                      | 17                   |
|                     | 32   | ,00    | .                                           | .          | 9                      | 16                   |
|                     | 33   | ,00    | .                                           | .          | 9                      | 15                   |
|                     | 34   | ,00    | .                                           | .          | 9                      | 14                   |
|                     | 35   | ,00    | .                                           | .          | 9                      | 13                   |
|                     | 36   | ,00    | .                                           | .          | 9                      | 12                   |
|                     | 37   | ,00    | .                                           | .          | 9                      | 11                   |
|                     | 38   | ,00    | .                                           | .          | 9                      | 10                   |
|                     | 39   | ,00    | .                                           | .          | 9                      | 9                    |
|                     | 40   | ,00    | .                                           | .          | 9                      | 8                    |
|                     | 41   | ,00    | .                                           | .          | 9                      | 7                    |
|                     | 42   | ,00    | .                                           | .          | 9                      | 6                    |
|                     | 43   | ,00    | .                                           | .          | 9                      | 5                    |
|                     | 44   | ,00    | .                                           | .          | 9                      | 4                    |
|                     | 45   | ,00    | .                                           | .          | 9                      | 3                    |
|                     | 46   | ,00    | .                                           | .          | 9                      | 2                    |
|                     | 47   | ,00    | .                                           | .          | 9                      | 1                    |
|                     | 48   | ,00    | .                                           | .          | 9                      | 0                    |

**Survival Table**

| Intensive Care Unit | Time | Status | Cumulative Proportion Surviving at the Time |            | N of Cumulative Events | N of Remaining Cases |    |
|---------------------|------|--------|---------------------------------------------|------------|------------------------|----------------------|----|
|                     |      |        | Estimate                                    | Std. Error |                        |                      |    |
| 1,0                 | 1    | 5,000  | 1,00                                        | ,929       | ,069                   | 1                    | 13 |
|                     | 2    | 16,000 | 1,00                                        | ,857       | ,094                   | 2                    | 12 |
|                     | 3    | 30,000 | ,00                                         | .          | .                      | 2                    | 11 |
|                     | 4    | 30,000 | ,00                                         | .          | .                      | 2                    | 10 |
|                     | 5    | 30,000 | ,00                                         | .          | .                      | 2                    | 9  |
|                     | 6    | 30,000 | ,00                                         | .          | .                      | 2                    | 8  |
|                     | 7    | 30,000 | ,00                                         | .          | .                      | 2                    | 7  |
|                     | 8    | 30,000 | ,00                                         | .          | .                      | 2                    | 6  |
|                     | 9    | 30,000 | ,00                                         | .          | .                      | 2                    | 5  |
|                     | 10   | 30,000 | ,00                                         | .          | .                      | 2                    | 4  |
|                     | 11   | 30,000 | ,00                                         | .          | .                      | 2                    | 3  |
|                     | 12   | 30,000 | ,00                                         | .          | .                      | 2                    | 2  |
|                     | 13   | 30,000 | ,00                                         | .          | .                      | 2                    | 1  |
|                     | 14   | 30,000 | ,00                                         | .          | .                      | 2                    | 0  |

**Means and Medians for Survival Time**

| Intensive Care Unit | Mean <sup>a</sup> |            |                         |             | Median   |            |             |
|---------------------|-------------------|------------|-------------------------|-------------|----------|------------|-------------|
|                     | Estimate          | Std. Error | 95% Confidence Interval |             | Estimate | Std. Error | 95% ...     |
|                     |                   |            | Lower Bound             | Upper Bound |          |            | Lower Bound |
| ,0                  | 26,938            | 1,069      | 24,842                  | 29,033      | .        | .          | .           |
| 1,0                 | 27,214            | 1,906      | 23,478                  | 30,951      | .        | .          | .           |
| Overall             | 27,000            | ,933       | 25,171                  | 28,829      | .        | .          | .           |

**Means and Medians for Survival Time**

| Intensive Care Unit | Median      |
|---------------------|-------------|
|                     | 95% ...     |
|                     | Upper Bound |
| ,0                  | .           |
| 1,0                 | .           |
| Overall             | .           |

a. Estimation is limited to the largest survival time if it is censored.

**Overall Comparisons**

|                       | Chi-Square | df | Sig. |
|-----------------------|------------|----|------|
| Log Rank (Mantel-Cox) | ,123       | 1  | ,726 |

Test of equality of survival distributions for the different levels of Intensive Care Unit

### Survival Functions

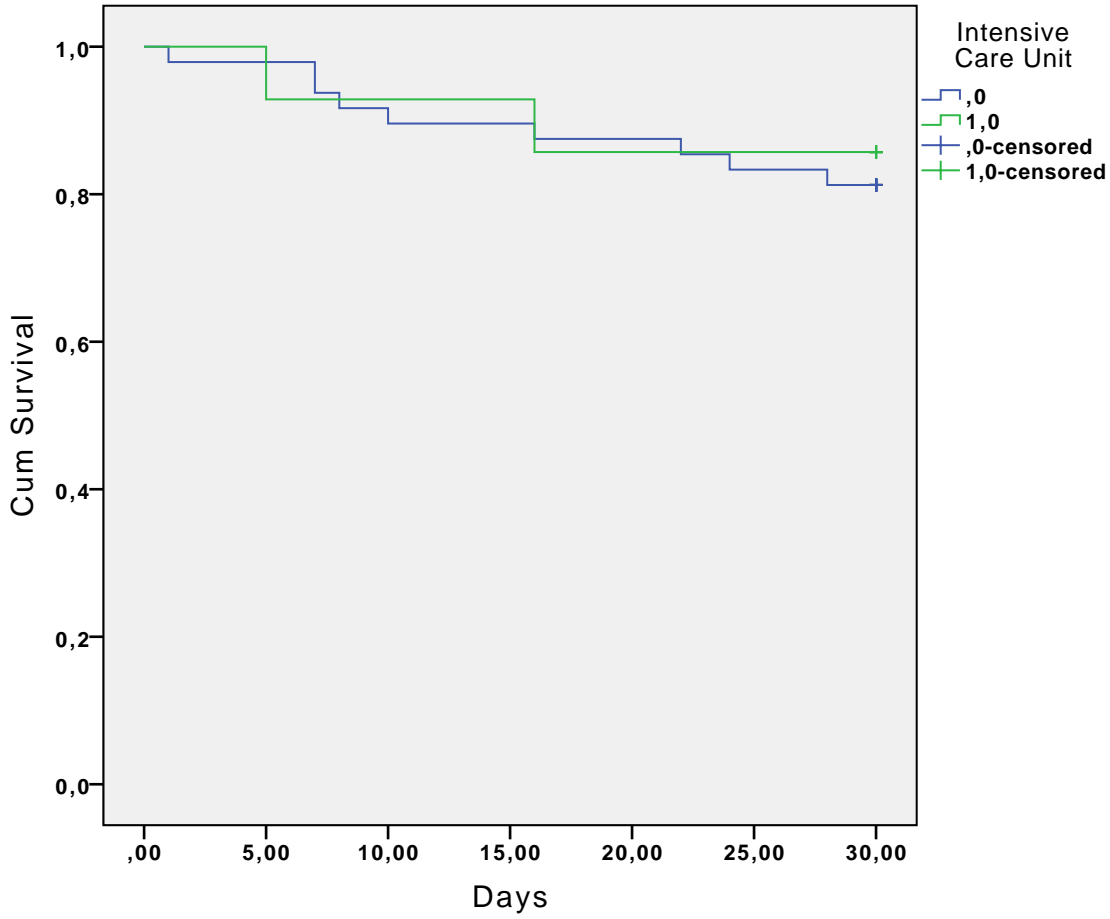

### NOSOCOMIAL (0=NO, 1=YES)

#### Case Processing Summary

| NOSOCOMIAL     | Total N   | N of Events | Censored  |              |
|----------------|-----------|-------------|-----------|--------------|
|                |           |             | N         | Percent      |
| ,0             | 34        | 6           | 28        | 82,4%        |
| 1,0            | 27        | 5           | 22        | 81,5%        |
| <b>Overall</b> | <b>61</b> | <b>11</b>   | <b>50</b> | <b>82,0%</b> |

Survival Table

| NOSOCOMIAL | Time | Status | Cumulative Proportion Surviving at the Time |            | N of Cumulative Events | N of Remaining Cases |
|------------|------|--------|---------------------------------------------|------------|------------------------|----------------------|
|            |      |        | Estimate                                    | Std. Error |                        |                      |
| ,0         | 1    | 1,00   | ,971                                        | ,029       | 1                      | 33                   |
|            | 2    | 1,00   | ,941                                        | ,040       | 2                      | 32                   |
|            | 3    | 1,00   | ,912                                        | ,049       | 3                      | 31                   |
|            | 4    | 1,00   | ,882                                        | ,055       | 4                      | 30                   |
|            | 5    | 1,00   | ,853                                        | ,061       | 5                      | 29                   |
|            | 6    | 1,00   | ,824                                        | ,065       | 6                      | 28                   |
|            | 7    | ,00    | .                                           | .          | 6                      | 27                   |
|            | 8    | ,00    | .                                           | .          | 6                      | 26                   |
|            | 9    | ,00    | .                                           | .          | 6                      | 25                   |
|            | 10   | ,00    | .                                           | .          | 6                      | 24                   |
|            | 11   | ,00    | .                                           | .          | 6                      | 23                   |
|            | 12   | ,00    | .                                           | .          | 6                      | 22                   |
|            | 13   | ,00    | .                                           | .          | 6                      | 21                   |
|            | 14   | ,00    | .                                           | .          | 6                      | 20                   |
|            | 15   | ,00    | .                                           | .          | 6                      | 19                   |
|            | 16   | ,00    | .                                           | .          | 6                      | 18                   |
|            | 17   | ,00    | .                                           | .          | 6                      | 17                   |
|            | 18   | ,00    | .                                           | .          | 6                      | 16                   |
|            | 19   | ,00    | .                                           | .          | 6                      | 15                   |
|            | 20   | ,00    | .                                           | .          | 6                      | 14                   |
|            | 21   | ,00    | .                                           | .          | 6                      | 13                   |
|            | 22   | ,00    | .                                           | .          | 6                      | 12                   |
|            | 23   | ,00    | .                                           | .          | 6                      | 11                   |
|            | 24   | ,00    | .                                           | .          | 6                      | 10                   |
|            | 25   | ,00    | .                                           | .          | 6                      | 9                    |
|            | 26   | ,00    | .                                           | .          | 6                      | 8                    |
|            | 27   | ,00    | .                                           | .          | 6                      | 7                    |
|            | 28   | ,00    | .                                           | .          | 6                      | 6                    |
|            | 29   | ,00    | .                                           | .          | 6                      | 5                    |
|            | 30   | ,00    | .                                           | .          | 6                      | 4                    |
|            | 31   | ,00    | .                                           | .          | 6                      | 3                    |
|            | 32   | ,00    | .                                           | .          | 6                      | 2                    |
|            | 33   | ,00    | .                                           | .          | 6                      | 1                    |
|            | 34   | ,00    | .                                           | .          | 6                      | 0                    |
| 1,0        | 1    | 1,00   | ,963                                        | ,036       | 1                      | 26                   |
|            | 2    | 1,00   | ,926                                        | ,050       | 2                      | 25                   |
|            | 3    | 1,00   | ,889                                        | ,060       | 3                      | 24                   |
|            | 4    | 1,00   | .                                           | .          | 4                      | 23                   |
|            | 5    | 1,00   | ,815                                        | ,075       | 5                      | 22                   |
|            | 6    | ,00    | .                                           | .          | 5                      | 21                   |
|            | 7    | ,00    | .                                           | .          | 5                      | 20                   |
|            | 8    | ,00    | .                                           | .          | 5                      | 19                   |
|            | 9    | ,00    | .                                           | .          | 5                      | 18                   |
|            | 10   | ,00    | .                                           | .          | 5                      | 17                   |
|            | 11   | ,00    | .                                           | .          | 5                      | 16                   |
|            | 12   | ,00    | .                                           | .          | 5                      | 15                   |
|            | 13   | ,00    | .                                           | .          | 5                      | 14                   |
|            | 14   | ,00    | .                                           | .          | 5                      | 13                   |
|            | 15   | ,00    | .                                           | .          | 5                      | 12                   |

Survival Table

| NOSOCOMIAL | Time   | Status | Cumulative Proportion Surviving at the Time |            | N of Cumulative Events | N of Remaining Cases |
|------------|--------|--------|---------------------------------------------|------------|------------------------|----------------------|
|            |        |        | Estimate                                    | Std. Error |                        |                      |
| 16         | 30,000 | ,00    | .                                           | .          | 5                      | 11                   |
| 17         | 30,000 | ,00    | .                                           | .          | 5                      | 10                   |
| 18         | 30,000 | ,00    | .                                           | .          | 5                      | 9                    |
| 19         | 30,000 | ,00    | .                                           | .          | 5                      | 8                    |
| 20         | 30,000 | ,00    | .                                           | .          | 5                      | 7                    |
| 21         | 30,000 | ,00    | .                                           | .          | 5                      | 6                    |
| 22         | 30,000 | ,00    | .                                           | .          | 5                      | 5                    |
| 23         | 30,000 | ,00    | .                                           | .          | 5                      | 4                    |
| 24         | 30,000 | ,00    | .                                           | .          | 5                      | 3                    |
| 25         | 30,000 | ,00    | .                                           | .          | 5                      | 2                    |
| 26         | 30,000 | ,00    | .                                           | .          | 5                      | 1                    |
| 27         | 30,000 | ,00    | .                                           | .          | 5                      | 0                    |

Means and Medians for Survival Time

| NOSOCOMIAL | Mean <sup>a</sup> |            |                         |             | Median   |            |             |
|------------|-------------------|------------|-------------------------|-------------|----------|------------|-------------|
|            | Estimate          | Std. Error | 95% Confidence Interval |             | Estimate | Std. Error | 95% ...     |
|            |                   |            | Lower Bound             | Upper Bound |          |            | Lower Bound |
| ,0         | 27,412            | 1,193      | 25,073                  | 29,751      | .        | .          | .           |
| 1,0        | 26,370            | 1,515      | 23,400                  | 29,341      | .        | .          | .           |
| Overall    | 26,951            | ,947       | 25,095                  | 28,807      | .        | .          | .           |

Means and Medians for Survival Time

| NOSOCOMIAL | Median      |
|------------|-------------|
|            | 95% ...     |
|            | Upper Bound |
| ,0         | .           |
| 1,0        | .           |
| Overall    | .           |

a. Estimation is limited to the largest survival time if it is censored.

Overall Comparisons

|                       | Chi-Square | df | Sig. |
|-----------------------|------------|----|------|
| Log Rank (Mantel-Cox) | ,017       | 1  | ,895 |

Test of equality of survival distributions for the different levels of NOSOCOMIAL.

### Survival Functions

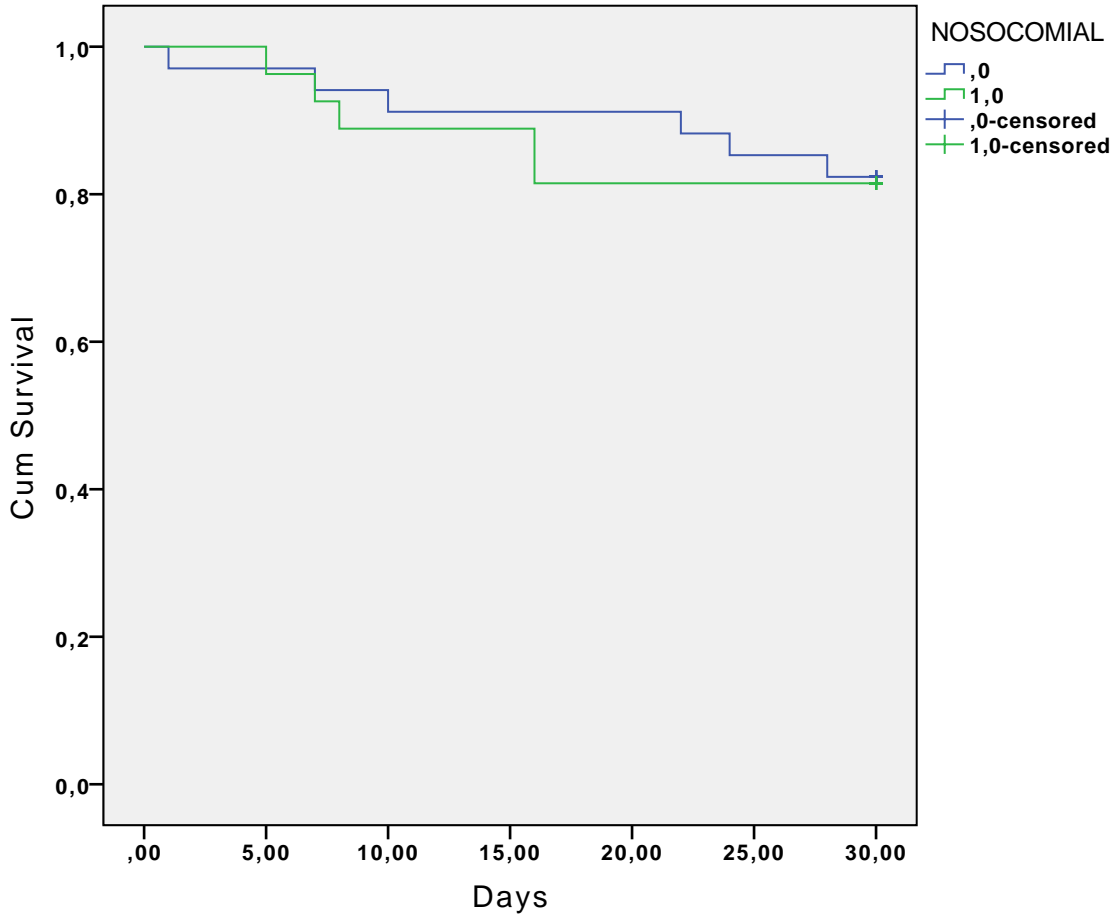

### HEALTHCARE ASSOCIATED (0=NO, 1=YES)

Case Processing Summary

| Healthcare Associated | Total N   | N of Events | Censored  |              |
|-----------------------|-----------|-------------|-----------|--------------|
|                       |           |             | N         | Percent      |
| ,0                    | 41        | 5           | 36        | 87,8%        |
| 1,0                   | 20        | 5           | 15        | 75,0%        |
| <b>Overall</b>        | <b>61</b> | <b>10</b>   | <b>51</b> | <b>83,6%</b> |



Survival Table

| Healthcare Associated | Time | Status | Cumulative Proportion Surviving at the Time |            | N of Cumulative Events | N of Remaining Cases |    |
|-----------------------|------|--------|---------------------------------------------|------------|------------------------|----------------------|----|
|                       |      |        | Estimate                                    | Std. Error |                        |                      |    |
| ,0                    | 1    | 7,000  | 1,00                                        | ,976       | ,024                   | 1                    | 40 |
|                       | 2    | 8,000  | 1,00                                        | ,951       | ,034                   | 2                    | 39 |
|                       | 3    | 16,000 | 1,00                                        | .          | .                      | 3                    | 38 |
|                       | 4    | 16,000 | 1,00                                        | ,902       | ,046                   | 4                    | 37 |
|                       | 5    | 22,000 | 1,00                                        | ,878       | ,051                   | 5                    | 36 |
|                       | 6    | 30,000 | ,00                                         | .          | .                      | 5                    | 35 |
|                       | 7    | 30,000 | ,00                                         | .          | .                      | 5                    | 34 |
|                       | 8    | 30,000 | ,00                                         | .          | .                      | 5                    | 33 |
|                       | 9    | 30,000 | ,00                                         | .          | .                      | 5                    | 32 |
|                       | 10   | 30,000 | ,00                                         | .          | .                      | 5                    | 31 |
|                       | 11   | 30,000 | ,00                                         | .          | .                      | 5                    | 30 |
|                       | 12   | 30,000 | ,00                                         | .          | .                      | 5                    | 29 |
|                       | 13   | 30,000 | ,00                                         | .          | .                      | 5                    | 28 |
|                       | 14   | 30,000 | ,00                                         | .          | .                      | 5                    | 27 |
|                       | 15   | 30,000 | ,00                                         | .          | .                      | 5                    | 26 |
|                       | 16   | 30,000 | ,00                                         | .          | .                      | 5                    | 25 |
|                       | 17   | 30,000 | ,00                                         | .          | .                      | 5                    | 24 |
|                       | 18   | 30,000 | ,00                                         | .          | .                      | 5                    | 23 |
|                       | 19   | 30,000 | ,00                                         | .          | .                      | 5                    | 22 |
|                       | 20   | 30,000 | ,00                                         | .          | .                      | 5                    | 21 |
|                       | 21   | 30,000 | ,00                                         | .          | .                      | 5                    | 20 |
|                       | 22   | 30,000 | ,00                                         | .          | .                      | 5                    | 19 |
|                       | 23   | 30,000 | ,00                                         | .          | .                      | 5                    | 18 |
|                       | 24   | 30,000 | ,00                                         | .          | .                      | 5                    | 17 |
|                       | 25   | 30,000 | ,00                                         | .          | .                      | 5                    | 16 |
|                       | 26   | 30,000 | ,00                                         | .          | .                      | 5                    | 15 |
|                       | 27   | 30,000 | ,00                                         | .          | .                      | 5                    | 14 |
|                       | 28   | 30,000 | ,00                                         | .          | .                      | 5                    | 13 |
|                       | 29   | 30,000 | ,00                                         | .          | .                      | 5                    | 12 |
|                       | 30   | 30,000 | ,00                                         | .          | .                      | 5                    | 11 |
|                       | 31   | 30,000 | ,00                                         | .          | .                      | 5                    | 10 |
|                       | 32   | 30,000 | ,00                                         | .          | .                      | 5                    | 9  |
|                       | 33   | 30,000 | ,00                                         | .          | .                      | 5                    | 8  |
|                       | 34   | 30,000 | ,00                                         | .          | .                      | 5                    | 7  |
|                       | 35   | 30,000 | ,00                                         | .          | .                      | 5                    | 6  |
|                       | 36   | 30,000 | ,00                                         | .          | .                      | 5                    | 5  |
|                       | 37   | 30,000 | ,00                                         | .          | .                      | 5                    | 4  |
|                       | 38   | 30,000 | ,00                                         | .          | .                      | 5                    | 3  |
|                       | 39   | 30,000 | ,00                                         | .          | .                      | 5                    | 2  |
|                       | 40   | 30,000 | ,00                                         | .          | .                      | 5                    | 1  |
|                       | 41   | 30,000 | ,00                                         | .          | .                      | 5                    | 0  |
| 1,0                   | 1    | 1,000  | 1,00                                        | ,950       | ,049                   | 1                    | 19 |
|                       | 2    | 7,000  | 1,00                                        | ,900       | ,067                   | 2                    | 18 |
|                       | 3    | 10,000 | 1,00                                        | ,850       | ,080                   | 3                    | 17 |
|                       | 4    | 24,000 | 1,00                                        | ,800       | ,089                   | 4                    | 16 |
|                       | 5    | 28,000 | 1,00                                        | ,750       | ,097                   | 5                    | 15 |
|                       | 6    | 30,000 | ,00                                         | .          | .                      | 5                    | 14 |
|                       | 7    | 30,000 | ,00                                         | .          | .                      | 5                    | 13 |
|                       | 8    | 30,000 | ,00                                         | .          | .                      | 5                    | 12 |

**Survival Table**

| Healthcare Associated | Time   | Status | Cumulative Proportion Surviving at the Time |            | N of Cumulative Events | N of Remaining Cases |
|-----------------------|--------|--------|---------------------------------------------|------------|------------------------|----------------------|
|                       |        |        | Estimate                                    | Std. Error |                        |                      |
| 9                     | 30,000 | ,00    | .                                           | .          | 5                      | 11                   |
| 10                    | 30,000 | ,00    | .                                           | .          | 5                      | 10                   |
| 11                    | 30,000 | ,00    | .                                           | .          | 5                      | 9                    |
| 12                    | 30,000 | ,00    | .                                           | .          | 5                      | 8                    |
| 13                    | 30,000 | ,00    | .                                           | .          | 5                      | 7                    |
| 14                    | 30,000 | ,00    | .                                           | .          | 5                      | 6                    |
| 15                    | 30,000 | ,00    | .                                           | .          | 5                      | 5                    |
| 16                    | 30,000 | ,00    | .                                           | .          | 5                      | 4                    |
| 17                    | 30,000 | ,00    | .                                           | .          | 5                      | 3                    |
| 18                    | 30,000 | ,00    | .                                           | .          | 5                      | 2                    |
| 19                    | 30,000 | ,00    | .                                           | .          | 5                      | 1                    |
| 20                    | 30,000 | ,00    | .                                           | .          | 5                      | 0                    |

**Means and Medians for Survival Time**

| Healthcare Associated | Mean <sup>a</sup> |            |                         |             | Median   |            |             |
|-----------------------|-------------------|------------|-------------------------|-------------|----------|------------|-------------|
|                       | Estimate          | Std. Error | 95% Confidence Interval |             | Estimate | Std. Error | 95% ...     |
|                       |                   |            | Lower Bound             | Upper Bound |          |            | Lower Bound |
| ,0                    | 28,024            | ,882       | 26,295                  | 29,754      | .        | .          | .           |
| 1,0                   | 26,000            | 1,930      | 22,217                  | 29,783      | .        | .          | .           |
| Overall               | 27,361            | ,876       | 25,644                  | 29,077      | .        | .          | .           |

**Means and Medians for Survival Time**

| Healthcare Associated | Median      |
|-----------------------|-------------|
|                       | 95% ...     |
|                       | Upper Bound |
| ,0                    | .           |
| 1,0                   | .           |
| Overall               | .           |

a. Estimation is limited to the largest survival time if it is censored.

**Overall Comparisons**

|                       | Chi-Square | df | Sig. |
|-----------------------|------------|----|------|
| Log Rank (Mantel-Cox) | 1,622      | 1  | ,203 |

Test of equality of survival distributions for the different levels of Healthcare Associated

### Survival Functions

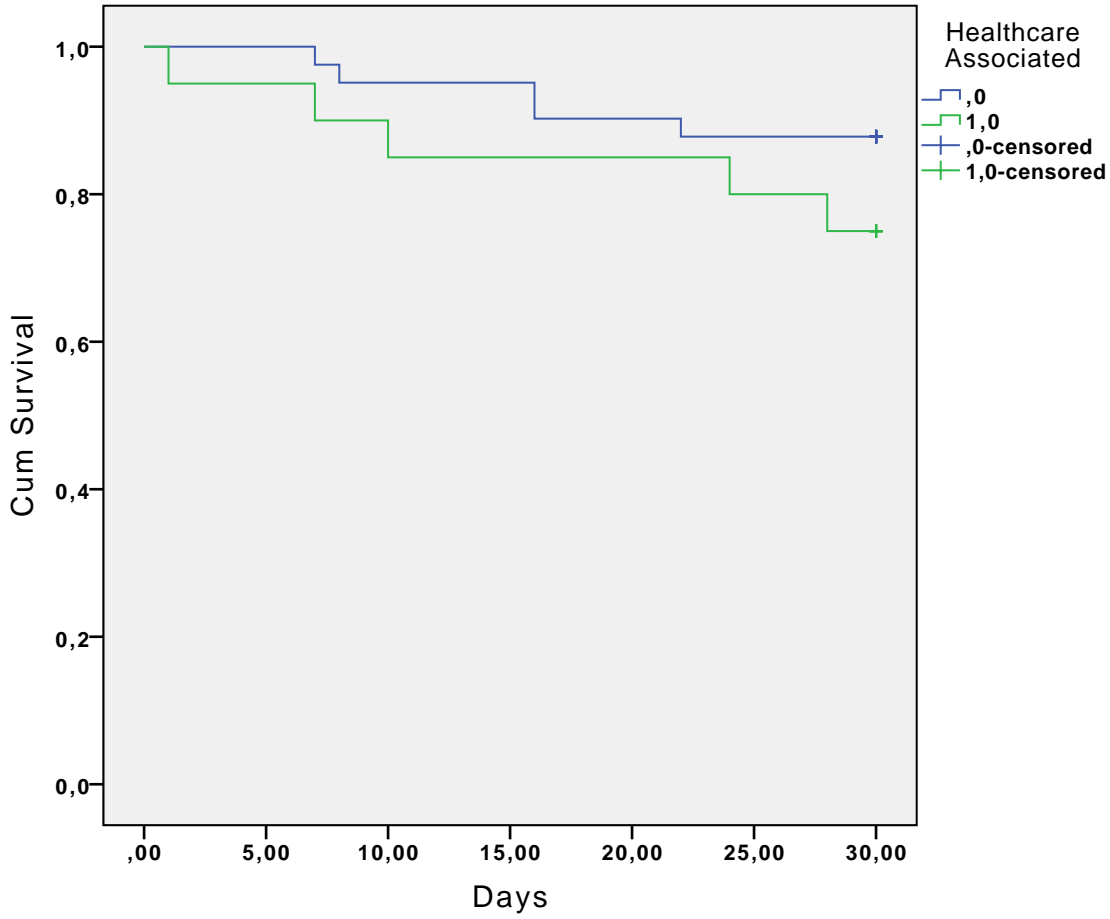

### INSTITUCIONALIZED (0=NO, 1=YES)

#### Warnings

No statistics are computed because all cases are censored.

#### Case Processing Summary

| Institucionalized | Total N | N of Events | Censored |         |
|-------------------|---------|-------------|----------|---------|
|                   |         |             | N        | Percent |
| ,0                | 57      | 10          | 47       | 82,5%   |
| 1,0               | 3       | 0           | 3        | 100,0%  |
| Overall           | 60      | 10          | 50       | 83,3%   |

Survival Table

| Institucionalized | Time | Status | Cumulative Proportion Surviving at the Time |            | N of Cumulative Events | N of Remaining Cases |
|-------------------|------|--------|---------------------------------------------|------------|------------------------|----------------------|
|                   |      |        | Estimate                                    | Std. Error |                        |                      |
| ,0                | 1    | 1,00   | ,982                                        | ,017       | 1                      | 56                   |
|                   | 2    | 1,00   | .                                           | .          | 2                      | 55                   |
|                   | 3    | 1,00   | ,947                                        | ,030       | 3                      | 54                   |
|                   | 4    | 1,00   | ,930                                        | ,034       | 4                      | 53                   |
|                   | 5    | 1,00   | ,912                                        | ,037       | 5                      | 52                   |
|                   | 6    | 1,00   | .                                           | .          | 6                      | 51                   |
|                   | 7    | 1,00   | ,877                                        | ,043       | 7                      | 50                   |
|                   | 8    | 1,00   | ,860                                        | ,046       | 8                      | 49                   |
|                   | 9    | 1,00   | ,842                                        | ,048       | 9                      | 48                   |
|                   | 10   | 1,00   | ,825                                        | ,050       | 10                     | 47                   |
|                   | 11   | ,00    | .                                           | .          | 10                     | 46                   |
|                   | 12   | ,00    | .                                           | .          | 10                     | 45                   |
|                   | 13   | ,00    | .                                           | .          | 10                     | 44                   |
|                   | 14   | ,00    | .                                           | .          | 10                     | 43                   |
|                   | 15   | ,00    | .                                           | .          | 10                     | 42                   |
|                   | 16   | ,00    | .                                           | .          | 10                     | 41                   |
|                   | 17   | ,00    | .                                           | .          | 10                     | 40                   |
|                   | 18   | ,00    | .                                           | .          | 10                     | 39                   |
|                   | 19   | ,00    | .                                           | .          | 10                     | 38                   |
|                   | 20   | ,00    | .                                           | .          | 10                     | 37                   |
|                   | 21   | ,00    | .                                           | .          | 10                     | 36                   |
|                   | 22   | ,00    | .                                           | .          | 10                     | 35                   |
|                   | 23   | ,00    | .                                           | .          | 10                     | 34                   |
|                   | 24   | ,00    | .                                           | .          | 10                     | 33                   |
|                   | 25   | ,00    | .                                           | .          | 10                     | 32                   |
|                   | 26   | ,00    | .                                           | .          | 10                     | 31                   |
|                   | 27   | ,00    | .                                           | .          | 10                     | 30                   |
|                   | 28   | ,00    | .                                           | .          | 10                     | 29                   |
|                   | 29   | ,00    | .                                           | .          | 10                     | 28                   |
|                   | 30   | ,00    | .                                           | .          | 10                     | 27                   |
|                   | 31   | ,00    | .                                           | .          | 10                     | 26                   |
|                   | 32   | ,00    | .                                           | .          | 10                     | 25                   |
|                   | 33   | ,00    | .                                           | .          | 10                     | 24                   |
|                   | 34   | ,00    | .                                           | .          | 10                     | 23                   |
|                   | 35   | ,00    | .                                           | .          | 10                     | 22                   |
|                   | 36   | ,00    | .                                           | .          | 10                     | 21                   |
|                   | 37   | ,00    | .                                           | .          | 10                     | 20                   |
|                   | 38   | ,00    | .                                           | .          | 10                     | 19                   |
|                   | 39   | ,00    | .                                           | .          | 10                     | 18                   |
|                   | 40   | ,00    | .                                           | .          | 10                     | 17                   |
|                   | 41   | ,00    | .                                           | .          | 10                     | 16                   |
|                   | 42   | ,00    | .                                           | .          | 10                     | 15                   |
|                   | 43   | ,00    | .                                           | .          | 10                     | 14                   |
|                   | 44   | ,00    | .                                           | .          | 10                     | 13                   |
|                   | 45   | ,00    | .                                           | .          | 10                     | 12                   |
|                   | 46   | ,00    | .                                           | .          | 10                     | 11                   |
|                   | 47   | ,00    | .                                           | .          | 10                     | 10                   |
|                   | 48   | ,00    | .                                           | .          | 10                     | 9                    |
|                   | 49   | ,00    | .                                           | .          | 10                     | 8                    |

Survival Table

| Institucionalized | Time   | Status | Cumulative Proportion Surviving at the Time |            | N of Cumulative Events | N of Remaining Cases |
|-------------------|--------|--------|---------------------------------------------|------------|------------------------|----------------------|
|                   |        |        | Estimate                                    | Std. Error |                        |                      |
| 50                | 30,000 | ,00    | .                                           | .          | 10                     | 7                    |
| 51                | 30,000 | ,00    | .                                           | .          | 10                     | 6                    |
| 52                | 30,000 | ,00    | .                                           | .          | 10                     | 5                    |
| 53                | 30,000 | ,00    | .                                           | .          | 10                     | 4                    |
| 54                | 30,000 | ,00    | .                                           | .          | 10                     | 3                    |
| 55                | 30,000 | ,00    | .                                           | .          | 10                     | 2                    |
| 56                | 30,000 | ,00    | .                                           | .          | 10                     | 1                    |
| 57                | 30,000 | ,00    | .                                           | .          | 10                     | 0                    |
| 1,0               | 1      | 30,000 | .                                           | .          | 0                      | 2                    |
|                   | 2      | 30,000 | .                                           | .          | 0                      | 1                    |

Overall Comparisons

|                       | Chi-Square | df | Sig. |
|-----------------------|------------|----|------|
| Log Rank (Mantel-Cox) | ,575       | 1  | ,448 |

Test of equality of survival distributions for the different levels of INSTITUCIÓN.

Survival Functions

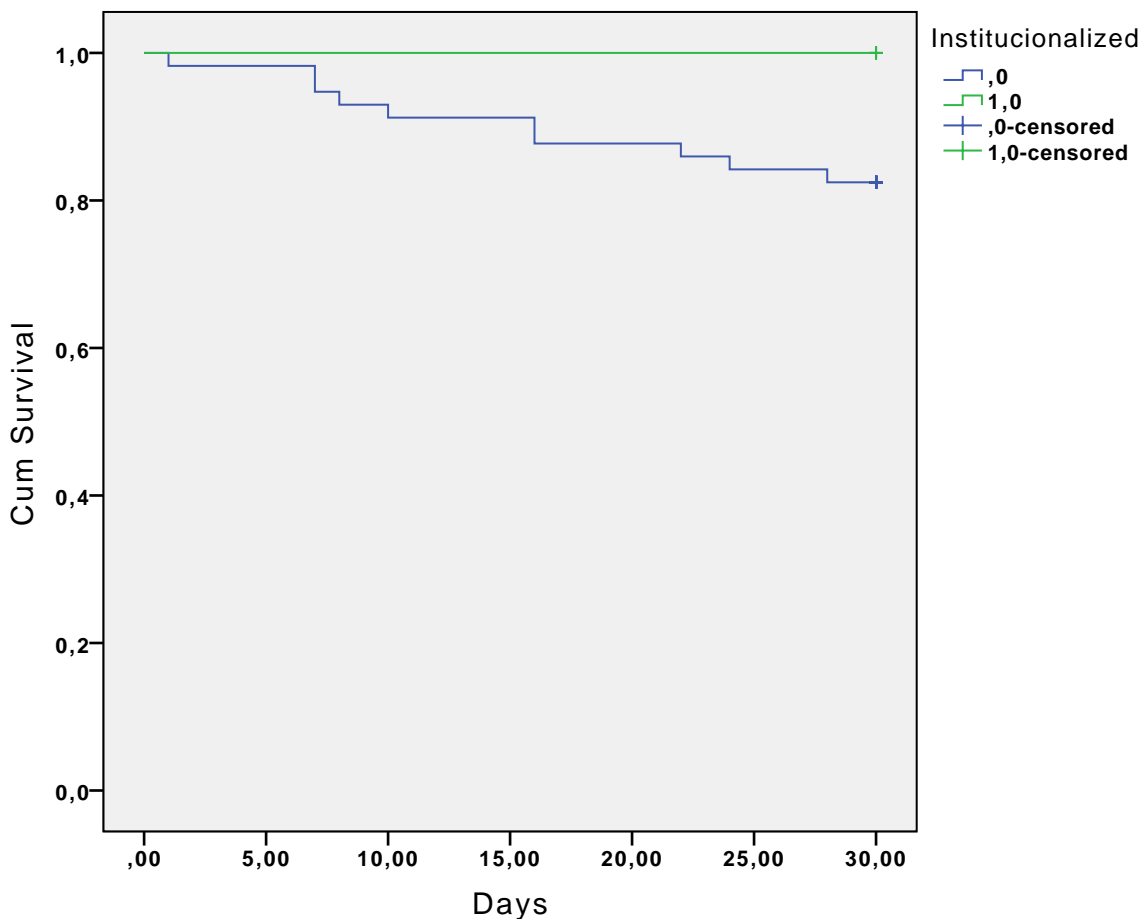

**CENTRAL VENOUS CATHETER (0=NO, 1=YES)**

Case Processing Summary

| Central Venous Catheter | Total N | N of Events | Censored |         |
|-------------------------|---------|-------------|----------|---------|
|                         |         |             | N        | Percent |
| ,0                      | 55      | 10          | 45       | 81,8%   |
| 1,0                     | 7       | 1           | 6        | 85,7%   |
| Overall                 | 62      | 11          | 51       | 82,3%   |

Survival Table

| Central Venous Catheter | Time | Status | Cumulative Proportion Surviving at the Time |            | N of Cumulative Events | N of Remaining Cases |
|-------------------------|------|--------|---------------------------------------------|------------|------------------------|----------------------|
|                         |      |        | Estimate                                    | Std. Error |                        |                      |
| ,0                      | 1    | 1,00   | ,982                                        | ,018       | 1                      | 54                   |
|                         | 2    | 1,00   | .                                           | .          | 2                      | 53                   |
|                         | 3    | 1,00   | ,945                                        | ,031       | 3                      | 52                   |
|                         | 4    | 1,00   | ,927                                        | ,035       | 4                      | 51                   |
|                         | 5    | 1,00   | ,909                                        | ,039       | 5                      | 50                   |
|                         | 6    | 1,00   | .                                           | .          | 6                      | 49                   |
|                         | 7    | 1,00   | ,873                                        | ,045       | 7                      | 48                   |
|                         | 8    | 1,00   | ,855                                        | ,048       | 8                      | 47                   |
|                         | 9    | 1,00   | ,836                                        | ,050       | 9                      | 46                   |
|                         | 10   | 1,00   | ,818                                        | ,052       | 10                     | 45                   |
|                         | 11   | ,00    | .                                           | .          | 10                     | 44                   |
|                         | 12   | ,00    | .                                           | .          | 10                     | 43                   |
|                         | 13   | ,00    | .                                           | .          | 10                     | 42                   |
|                         | 14   | ,00    | .                                           | .          | 10                     | 41                   |
|                         | 15   | ,00    | .                                           | .          | 10                     | 40                   |
|                         | 16   | ,00    | .                                           | .          | 10                     | 39                   |
|                         | 17   | ,00    | .                                           | .          | 10                     | 38                   |
|                         | 18   | ,00    | .                                           | .          | 10                     | 37                   |
|                         | 19   | ,00    | .                                           | .          | 10                     | 36                   |
|                         | 20   | ,00    | .                                           | .          | 10                     | 35                   |
|                         | 21   | ,00    | .                                           | .          | 10                     | 34                   |
|                         | 22   | ,00    | .                                           | .          | 10                     | 33                   |
|                         | 23   | ,00    | .                                           | .          | 10                     | 32                   |
|                         | 24   | ,00    | .                                           | .          | 10                     | 31                   |
|                         | 25   | ,00    | .                                           | .          | 10                     | 30                   |
|                         | 26   | ,00    | .                                           | .          | 10                     | 29                   |
|                         | 27   | ,00    | .                                           | .          | 10                     | 28                   |
|                         | 28   | ,00    | .                                           | .          | 10                     | 27                   |
|                         | 29   | ,00    | .                                           | .          | 10                     | 26                   |
|                         | 30   | ,00    | .                                           | .          | 10                     | 25                   |
|                         | 31   | ,00    | .                                           | .          | 10                     | 24                   |
|                         | 32   | ,00    | .                                           | .          | 10                     | 23                   |
|                         | 33   | ,00    | .                                           | .          | 10                     | 22                   |
|                         | 34   | ,00    | .                                           | .          | 10                     | 21                   |
|                         | 35   | ,00    | .                                           | .          | 10                     | 20                   |
|                         | 36   | ,00    | .                                           | .          | 10                     | 19                   |
|                         | 37   | ,00    | .                                           | .          | 10                     | 18                   |
|                         | 38   | ,00    | .                                           | .          | 10                     | 17                   |
|                         | 39   | ,00    | .                                           | .          | 10                     | 16                   |
|                         | 40   | ,00    | .                                           | .          | 10                     | 15                   |
|                         | 41   | ,00    | .                                           | .          | 10                     | 14                   |
|                         | 42   | ,00    | .                                           | .          | 10                     | 13                   |

Survival Table

| Central Venous Catheter | Time   | Status | Cumulative Proportion Surviving at the Time |            | N of Cumulative Events | N of Remaining Cases |   |
|-------------------------|--------|--------|---------------------------------------------|------------|------------------------|----------------------|---|
|                         |        |        | Estimate                                    | Std. Error |                        |                      |   |
| 43                      | 30,000 | ,00    | .                                           | .          | 10                     | 12                   |   |
| 44                      | 30,000 | ,00    | .                                           | .          | 10                     | 11                   |   |
| 45                      | 30,000 | ,00    | .                                           | .          | 10                     | 10                   |   |
| 46                      | 30,000 | ,00    | .                                           | .          | 10                     | 9                    |   |
| 47                      | 30,000 | ,00    | .                                           | .          | 10                     | 8                    |   |
| 48                      | 30,000 | ,00    | .                                           | .          | 10                     | 7                    |   |
| 49                      | 30,000 | ,00    | .                                           | .          | 10                     | 6                    |   |
| 50                      | 30,000 | ,00    | .                                           | .          | 10                     | 5                    |   |
| 51                      | 30,000 | ,00    | .                                           | .          | 10                     | 4                    |   |
| 52                      | 30,000 | ,00    | .                                           | .          | 10                     | 3                    |   |
| 53                      | 30,000 | ,00    | .                                           | .          | 10                     | 2                    |   |
| 54                      | 30,000 | ,00    | .                                           | .          | 10                     | 1                    |   |
| 55                      | 30,000 | ,00    | .                                           | .          | 10                     | 0                    |   |
| 1,0                     | 1      | 5,000  | 1,00                                        | ,857       | ,132                   | 1                    | 6 |
| 2                       | 30,000 | ,00    | .                                           | .          | 1                      | 5                    |   |
| 3                       | 30,000 | ,00    | .                                           | .          | 1                      | 4                    |   |
| 4                       | 30,000 | ,00    | .                                           | .          | 1                      | 3                    |   |
| 5                       | 30,000 | ,00    | .                                           | .          | 1                      | 2                    |   |
| 6                       | 30,000 | ,00    | .                                           | .          | 1                      | 1                    |   |
| 7                       | 30,000 | ,00    | .                                           | .          | 1                      | 0                    |   |

Means and Medians for Survival Time

| Central Venous Catheter | Mean <sup>a</sup> |            |                         |             | Median   |            |             |
|-------------------------|-------------------|------------|-------------------------|-------------|----------|------------|-------------|
|                         | Estimate          | Std. Error | 95% Confidence Interval |             | Estimate | Std. Error | 95% ...     |
|                         |                   |            | Lower Bound             | Upper Bound |          |            | Lower Bound |
| ,0                      | 27,073            | ,963       | 25,184                  | 28,961      | .        | .          | .           |
| 1,0                     | 26,429            | 3,307      | 19,948                  | 32,909      | .        | .          | .           |
| Overall                 | 27,000            | ,933       | 25,171                  | 28,829      | .        | .          | .           |

Means and Medians for Survival Time

| Median                  |             |
|-------------------------|-------------|
| 95% ...                 |             |
| Central Venous Catheter | Upper Bound |
| ,0                      | .           |
| 1,0                     | .           |
| Overall                 | .           |

a. Estimation is limited to the largest survival time if it is censored.

Overall Comparisons

|                       | Chi-Square | df | Sig. |
|-----------------------|------------|----|------|
| Log Rank (Mantel-Cox) | ,034       | 1  | ,853 |

Test of equality of survival distributions for the different levels of Central Venous Catheter

### Survival Functions

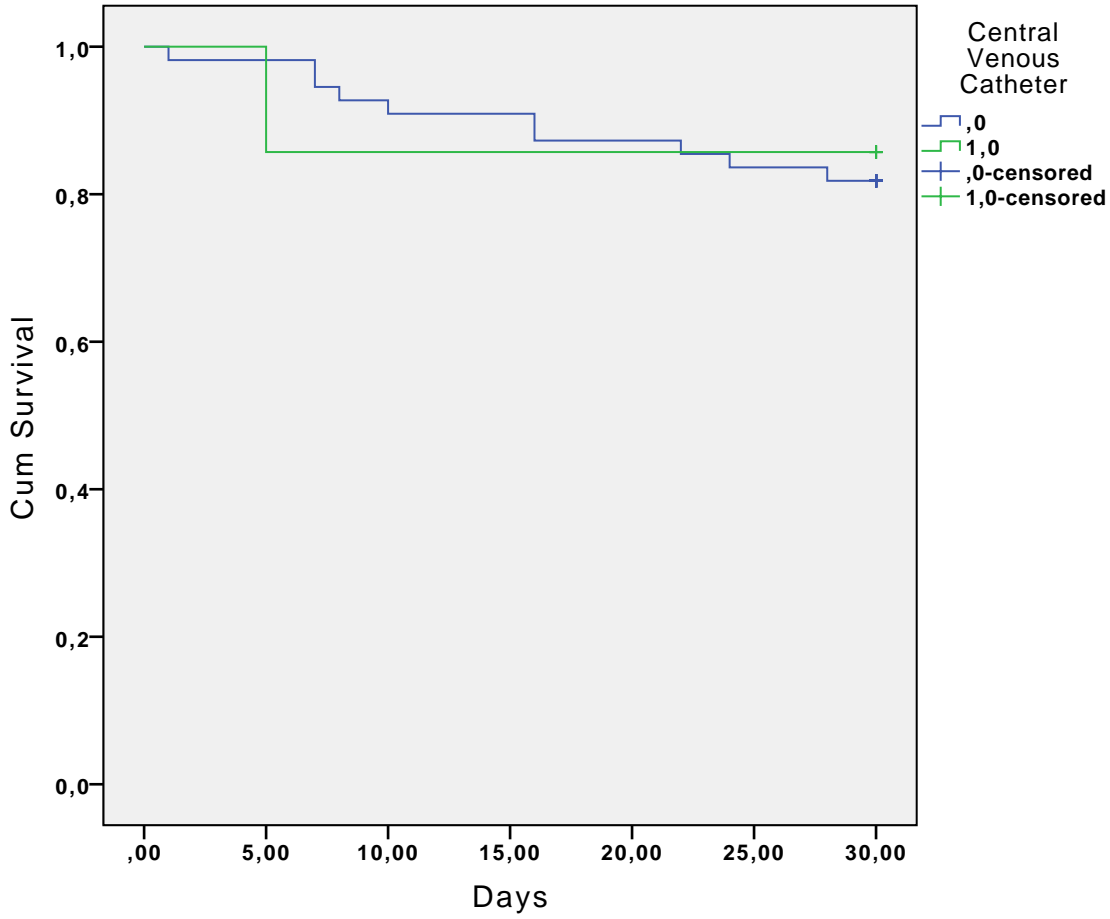

### MECHANICAL VENTILATION (0=NO, 1=YES)

#### Case Processing Summary

| Mechanical Ventilation | Total N | N of Events | Censored |         |
|------------------------|---------|-------------|----------|---------|
|                        |         |             | N        | Percent |
| ,0                     | 57      | 10          | 47       | 82,5%   |
| 1,0                    | 5       | 1           | 4        | 80,0%   |
| Overall                | 62      | 11          | 51       | 82,3%   |



Survival Table

| Mechanical Ventilation | Time | Status | Cumulative Proportion Surviving at the Time |            | N of Cumulative Events | N of Remaining Cases |
|------------------------|------|--------|---------------------------------------------|------------|------------------------|----------------------|
|                        |      |        | Estimate                                    | Std. Error |                        |                      |
| ,0                     | 1    | 1,00   | ,982                                        | ,017       | 1                      | 56                   |
|                        | 2    | 1,00   | .                                           | .          | 2                      | 55                   |
|                        | 3    | 1,00   | ,947                                        | ,030       | 3                      | 54                   |
|                        | 4    | 1,00   | ,930                                        | ,034       | 4                      | 53                   |
|                        | 5    | 1,00   | ,912                                        | ,037       | 5                      | 52                   |
|                        | 6    | 1,00   | .                                           | .          | 6                      | 51                   |
|                        | 7    | 1,00   | ,877                                        | ,043       | 7                      | 50                   |
|                        | 8    | 1,00   | ,860                                        | ,046       | 8                      | 49                   |
|                        | 9    | 1,00   | ,842                                        | ,048       | 9                      | 48                   |
|                        | 10   | 1,00   | ,825                                        | ,050       | 10                     | 47                   |
|                        | 11   | ,00    | .                                           | .          | 10                     | 46                   |
|                        | 12   | ,00    | .                                           | .          | 10                     | 45                   |
|                        | 13   | ,00    | .                                           | .          | 10                     | 44                   |
|                        | 14   | ,00    | .                                           | .          | 10                     | 43                   |
|                        | 15   | ,00    | .                                           | .          | 10                     | 42                   |
|                        | 16   | ,00    | .                                           | .          | 10                     | 41                   |
|                        | 17   | ,00    | .                                           | .          | 10                     | 40                   |
|                        | 18   | ,00    | .                                           | .          | 10                     | 39                   |
|                        | 19   | ,00    | .                                           | .          | 10                     | 38                   |
|                        | 20   | ,00    | .                                           | .          | 10                     | 37                   |
|                        | 21   | ,00    | .                                           | .          | 10                     | 36                   |
|                        | 22   | ,00    | .                                           | .          | 10                     | 35                   |
|                        | 23   | ,00    | .                                           | .          | 10                     | 34                   |
|                        | 24   | ,00    | .                                           | .          | 10                     | 33                   |
|                        | 25   | ,00    | .                                           | .          | 10                     | 32                   |
|                        | 26   | ,00    | .                                           | .          | 10                     | 31                   |
|                        | 27   | ,00    | .                                           | .          | 10                     | 30                   |
|                        | 28   | ,00    | .                                           | .          | 10                     | 29                   |
|                        | 29   | ,00    | .                                           | .          | 10                     | 28                   |
|                        | 30   | ,00    | .                                           | .          | 10                     | 27                   |
|                        | 31   | ,00    | .                                           | .          | 10                     | 26                   |
|                        | 32   | ,00    | .                                           | .          | 10                     | 25                   |
|                        | 33   | ,00    | .                                           | .          | 10                     | 24                   |
|                        | 34   | ,00    | .                                           | .          | 10                     | 23                   |
|                        | 35   | ,00    | .                                           | .          | 10                     | 22                   |
|                        | 36   | ,00    | .                                           | .          | 10                     | 21                   |
|                        | 37   | ,00    | .                                           | .          | 10                     | 20                   |
|                        | 38   | ,00    | .                                           | .          | 10                     | 19                   |
|                        | 39   | ,00    | .                                           | .          | 10                     | 18                   |
|                        | 40   | ,00    | .                                           | .          | 10                     | 17                   |
|                        | 41   | ,00    | .                                           | .          | 10                     | 16                   |
|                        | 42   | ,00    | .                                           | .          | 10                     | 15                   |
|                        | 43   | ,00    | .                                           | .          | 10                     | 14                   |
|                        | 44   | ,00    | .                                           | .          | 10                     | 13                   |
|                        | 45   | ,00    | .                                           | .          | 10                     | 12                   |
|                        | 46   | ,00    | .                                           | .          | 10                     | 11                   |
|                        | 47   | ,00    | .                                           | .          | 10                     | 10                   |
|                        | 48   | ,00    | .                                           | .          | 10                     | 9                    |
|                        | 49   | ,00    | .                                           | .          | 10                     | 8                    |

Survival Table

| Mechanical Ventilation | Time   | Status | Cumulative Proportion Surviving at the Time |            | N of Cumulative Events | N of Remaining Cases |   |
|------------------------|--------|--------|---------------------------------------------|------------|------------------------|----------------------|---|
|                        |        |        | Estimate                                    | Std. Error |                        |                      |   |
| 50                     | 30,000 | ,00    | .                                           | .          | 10                     | 7                    |   |
| 51                     | 30,000 | ,00    | .                                           | .          | 10                     | 6                    |   |
| 52                     | 30,000 | ,00    | .                                           | .          | 10                     | 5                    |   |
| 53                     | 30,000 | ,00    | .                                           | .          | 10                     | 4                    |   |
| 54                     | 30,000 | ,00    | .                                           | .          | 10                     | 3                    |   |
| 55                     | 30,000 | ,00    | .                                           | .          | 10                     | 2                    |   |
| 56                     | 30,000 | ,00    | .                                           | .          | 10                     | 1                    |   |
| 57                     | 30,000 | ,00    | .                                           | .          | 10                     | 0                    |   |
| 1,0                    | 1      | 5,000  | 1,00                                        | ,800       | ,179                   | 1                    | 4 |
| 2                      | 30,000 | ,00    | .                                           | .          | 1                      | 3                    |   |
| 3                      | 30,000 | ,00    | .                                           | .          | 1                      | 2                    |   |
| 4                      | 30,000 | ,00    | .                                           | .          | 1                      | 1                    |   |
| 5                      | 30,000 | ,00    | .                                           | .          | 1                      | 0                    |   |

Means and Medians for Survival Time

| Mechanical Ventilation | Mean <sup>a</sup> |            |                         |             | Median   |            |             |
|------------------------|-------------------|------------|-------------------------|-------------|----------|------------|-------------|
|                        | Estimate          | Std. Error | 95% Confidence Interval |             | Estimate | Std. Error | 95% ...     |
|                        |                   |            | Lower Bound             | Upper Bound |          |            | Lower Bound |
| ,0                     | 27,175            | ,932       | 25,348                  | 29,003      | .        | .          | .           |
| 1,0                    | 25,000            | 4,472      | 16,235                  | 33,765      | .        | .          | .           |
| Overall                | 27,000            | ,933       | 25,171                  | 28,829      | .        | .          | .           |

Means and Medians for Survival Time

| Mechanical Ventilation | Median      |
|------------------------|-------------|
|                        | 95% ...     |
|                        | Upper Bound |
| ,0                     | .           |
| 1,0                    | .           |
| Overall                | .           |

a. Estimation is limited to the largest survival time if it is censored.

Overall Comparisons

|                       | Chi-Square | df | Sig. |
|-----------------------|------------|----|------|
| Log Rank (Mantel-Cox) | ,052       | 1  | ,820 |

Test of equality of survival distributions for the different levels of Mechanical Ventilation

### Survival Functions

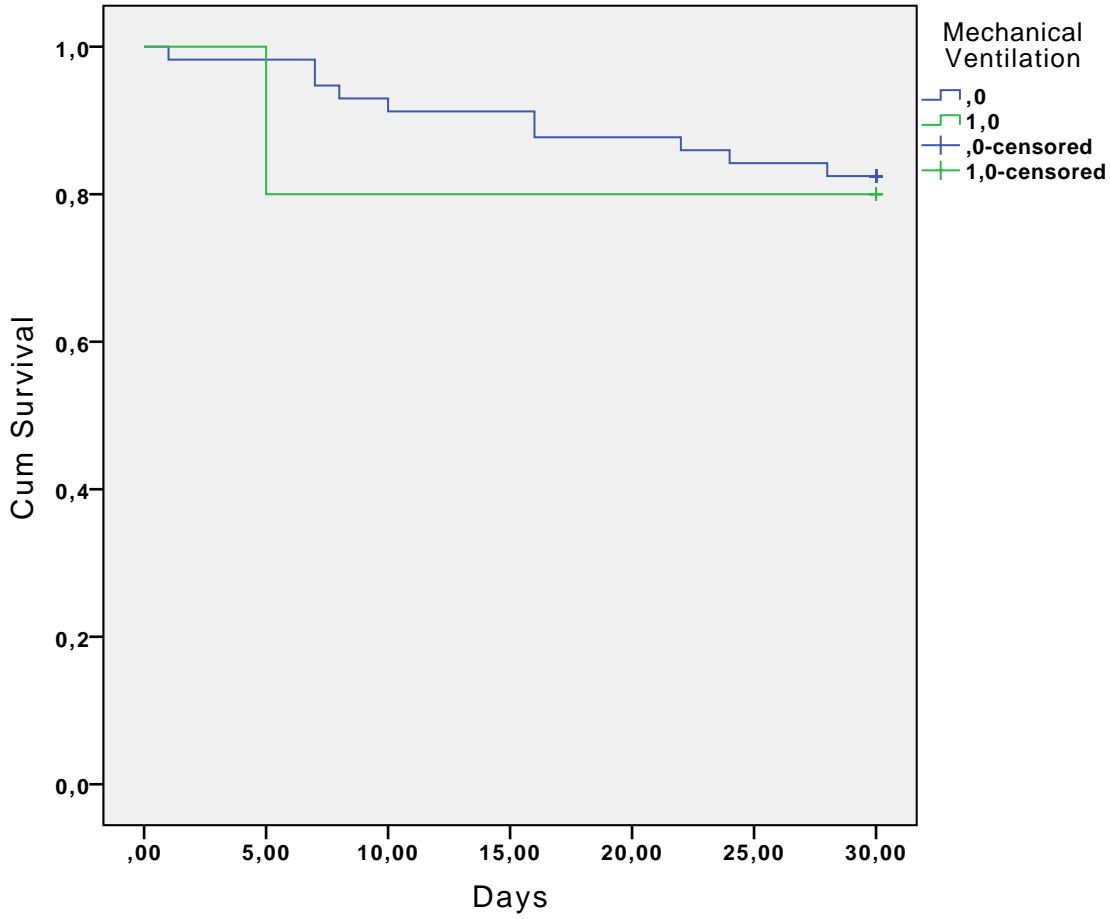

### URINARY CATHETER (0=NO, 1=YES)

#### Case Processing Summary

| Urinary Catheter | Total N | N of Events | Censored |         |
|------------------|---------|-------------|----------|---------|
|                  |         |             | N        | Percent |
| ,0               | 19      | 3           | 16       | 84,2%   |
| 1,0              | 43      | 8           | 35       | 81,4%   |
| Overall          | 62      | 11          | 51       | 82,3%   |

Survival Table

| Urinary Catheter | Time | Status | Cumulative Proportion Surviving at the Time |            | N of Cumulative Events | N of Remaining Cases |    |
|------------------|------|--------|---------------------------------------------|------------|------------------------|----------------------|----|
|                  |      |        | Estimate                                    | Std. Error |                        |                      |    |
| ,0               | 1    | 7,000  | 1,00                                        | ,947       | ,051                   | 1                    | 18 |
|                  | 2    | 10,000 | 1,00                                        | ,895       | ,070                   | 2                    | 17 |
|                  | 3    | 24,000 | 1,00                                        | ,842       | ,084                   | 3                    | 16 |
|                  | 4    | 30,000 | ,00                                         | .          | .                      | 3                    | 15 |
|                  | 5    | 30,000 | ,00                                         | .          | .                      | 3                    | 14 |
|                  | 6    | 30,000 | ,00                                         | .          | .                      | 3                    | 13 |
|                  | 7    | 30,000 | ,00                                         | .          | .                      | 3                    | 12 |
|                  | 8    | 30,000 | ,00                                         | .          | .                      | 3                    | 11 |
|                  | 9    | 30,000 | ,00                                         | .          | .                      | 3                    | 10 |
|                  | 10   | 30,000 | ,00                                         | .          | .                      | 3                    | 9  |
|                  | 11   | 30,000 | ,00                                         | .          | .                      | 3                    | 8  |
|                  | 12   | 30,000 | ,00                                         | .          | .                      | 3                    | 7  |
|                  | 13   | 30,000 | ,00                                         | .          | .                      | 3                    | 6  |
|                  | 14   | 30,000 | ,00                                         | .          | .                      | 3                    | 5  |
|                  | 15   | 30,000 | ,00                                         | .          | .                      | 3                    | 4  |
|                  | 16   | 30,000 | ,00                                         | .          | .                      | 3                    | 3  |
|                  | 17   | 30,000 | ,00                                         | .          | .                      | 3                    | 2  |
|                  | 18   | 30,000 | ,00                                         | .          | .                      | 3                    | 1  |
|                  | 19   | 30,000 | ,00                                         | .          | .                      | 3                    | 0  |
| 1,0              | 1    | 1,000  | 1,00                                        | ,977       | ,023                   | 1                    | 42 |
|                  | 2    | 5,000  | 1,00                                        | ,953       | ,032                   | 2                    | 41 |
|                  | 3    | 7,000  | 1,00                                        | ,930       | ,039                   | 3                    | 40 |
|                  | 4    | 8,000  | 1,00                                        | ,907       | ,044                   | 4                    | 39 |
|                  | 5    | 16,000 | 1,00                                        | .          | .                      | 5                    | 38 |
|                  | 6    | 16,000 | 1,00                                        | ,860       | ,053                   | 6                    | 37 |
|                  | 7    | 22,000 | 1,00                                        | ,837       | ,056                   | 7                    | 36 |
|                  | 8    | 28,000 | 1,00                                        | ,814       | ,059                   | 8                    | 35 |
|                  | 9    | 30,000 | ,00                                         | .          | .                      | 8                    | 34 |
|                  | 10   | 30,000 | ,00                                         | .          | .                      | 8                    | 33 |
|                  | 11   | 30,000 | ,00                                         | .          | .                      | 8                    | 32 |
|                  | 12   | 30,000 | ,00                                         | .          | .                      | 8                    | 31 |
|                  | 13   | 30,000 | ,00                                         | .          | .                      | 8                    | 30 |
|                  | 14   | 30,000 | ,00                                         | .          | .                      | 8                    | 29 |
|                  | 15   | 30,000 | ,00                                         | .          | .                      | 8                    | 28 |
|                  | 16   | 30,000 | ,00                                         | .          | .                      | 8                    | 27 |
|                  | 17   | 30,000 | ,00                                         | .          | .                      | 8                    | 26 |
|                  | 18   | 30,000 | ,00                                         | .          | .                      | 8                    | 25 |
|                  | 19   | 30,000 | ,00                                         | .          | .                      | 8                    | 24 |
|                  | 20   | 30,000 | ,00                                         | .          | .                      | 8                    | 23 |
|                  | 21   | 30,000 | ,00                                         | .          | .                      | 8                    | 22 |
|                  | 22   | 30,000 | ,00                                         | .          | .                      | 8                    | 21 |
|                  | 23   | 30,000 | ,00                                         | .          | .                      | 8                    | 20 |
|                  | 24   | 30,000 | ,00                                         | .          | .                      | 8                    | 19 |
|                  | 25   | 30,000 | ,00                                         | .          | .                      | 8                    | 18 |
|                  | 26   | 30,000 | ,00                                         | .          | .                      | 8                    | 17 |
|                  | 27   | 30,000 | ,00                                         | .          | .                      | 8                    | 16 |
|                  | 28   | 30,000 | ,00                                         | .          | .                      | 8                    | 15 |
|                  | 29   | 30,000 | ,00                                         | .          | .                      | 8                    | 14 |
|                  | 30   | 30,000 | ,00                                         | .          | .                      | 8                    | 13 |

Survival Table

| Urinary Catheter | Time   | Status | Cumulative Proportion Surviving at the Time |            | N of Cumulative Events | N of Remaining Cases |
|------------------|--------|--------|---------------------------------------------|------------|------------------------|----------------------|
|                  |        |        | Estimate                                    | Std. Error |                        |                      |
| 31               | 30,000 | ,00    | .                                           | .          | 8                      | 12                   |
| 32               | 30,000 | ,00    | .                                           | .          | 8                      | 11                   |
| 33               | 30,000 | ,00    | .                                           | .          | 8                      | 10                   |
| 34               | 30,000 | ,00    | .                                           | .          | 8                      | 9                    |
| 35               | 30,000 | ,00    | .                                           | .          | 8                      | 8                    |
| 36               | 30,000 | ,00    | .                                           | .          | 8                      | 7                    |
| 37               | 30,000 | ,00    | .                                           | .          | 8                      | 6                    |
| 38               | 30,000 | ,00    | .                                           | .          | 8                      | 5                    |
| 39               | 30,000 | ,00    | .                                           | .          | 8                      | 4                    |
| 40               | 30,000 | ,00    | .                                           | .          | 8                      | 3                    |
| 41               | 30,000 | ,00    | .                                           | .          | 8                      | 2                    |
| 42               | 30,000 | ,00    | .                                           | .          | 8                      | 1                    |
| 43               | 30,000 | ,00    | .                                           | .          | 8                      | 0                    |

Means and Medians for Survival Time

| Urinary Catheter | Mean <sup>a</sup> |            |                         |             | Median   |            |             |
|------------------|-------------------|------------|-------------------------|-------------|----------|------------|-------------|
|                  | Estimate          | Std. Error | 95% Confidence Interval |             | Estimate | Std. Error | 95% ...     |
|                  |                   |            | Lower Bound             | Upper Bound |          |            | Lower Bound |
| ,0               | 27,421            | 1,524      | 24,434                  | 30,408      | .        | .          | .           |
| 1,0              | 26,814            | 1,163      | 24,534                  | 29,094      | .        | .          | .           |
| Overall          | 27,000            | ,933       | 25,171                  | 28,829      | .        | .          | .           |

Means and Medians for Survival Time

| Urinary Catheter | Median      |
|------------------|-------------|
|                  | 95% ...     |
|                  | Upper Bound |
| ,0               | .           |
| 1,0              | .           |
| Overall          | .           |

a. Estimation is limited to the largest survival time if it is censored.

Overall Comparisons

|                       | Chi-Square | df | Sig. |
|-----------------------|------------|----|------|
| Log Rank (Mantel-Cox) | ,078       | 1  | ,780 |

Test of equality of survival distributions for the different levels of Urinary Catheter

### Survival Functions

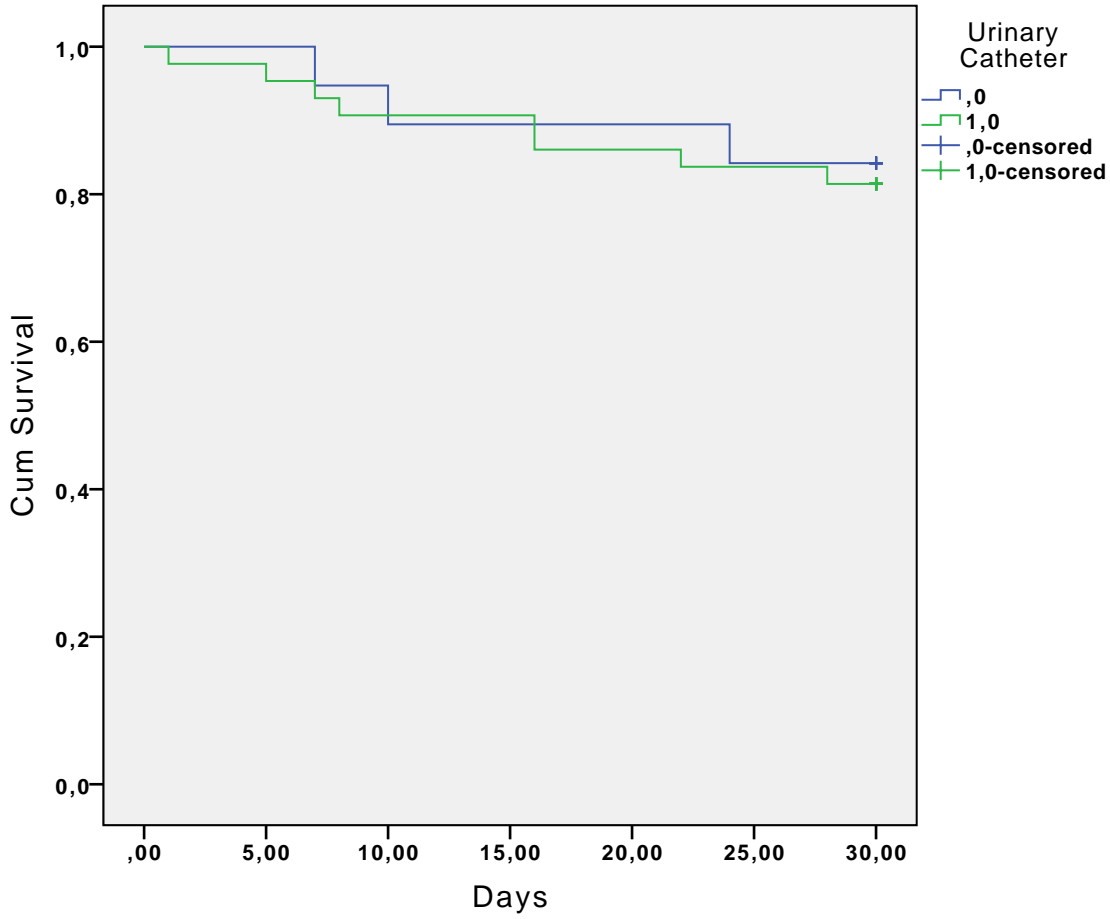

### GASTROSTOMY (0=NO, 1=YES)

Case Processing Summary

| Gastrostomy    | Total N   | N of Events | Censored  |              |
|----------------|-----------|-------------|-----------|--------------|
|                |           |             | N         | Percent      |
| ,0             | 56        | 10          | 46        | 82,1%        |
| 1,0            | 6         | 1           | 5         | 83,3%        |
| <b>Overall</b> | <b>62</b> | <b>11</b>   | <b>51</b> | <b>82,3%</b> |

Survival Table

| Gastrostomy | Time | Status | Cumulative Proportion Surviving at the Time |            | N of Cumulative Events | N of Remaining Cases |
|-------------|------|--------|---------------------------------------------|------------|------------------------|----------------------|
|             |      |        | Estimate                                    | Std. Error |                        |                      |
| ,0          | 1    | 1,00   | ,982                                        | ,018       | 1                      | 55                   |
|             | 2    | 1,00   | .                                           | .          | 2                      | 54                   |
|             | 3    | 1,00   | ,946                                        | ,030       | 3                      | 53                   |
|             | 4    | 1,00   | ,929                                        | ,034       | 4                      | 52                   |
|             | 5    | 1,00   | ,911                                        | ,038       | 5                      | 51                   |
|             | 6    | 1,00   | .                                           | .          | 6                      | 50                   |
|             | 7    | 1,00   | ,875                                        | ,044       | 7                      | 49                   |
|             | 8    | 1,00   | ,857                                        | ,047       | 8                      | 48                   |
|             | 9    | 1,00   | ,839                                        | ,049       | 9                      | 47                   |
|             | 10   | 1,00   | ,821                                        | ,051       | 10                     | 46                   |
|             | 11   | ,00    | .                                           | .          | 10                     | 45                   |
|             | 12   | ,00    | .                                           | .          | 10                     | 44                   |
|             | 13   | ,00    | .                                           | .          | 10                     | 43                   |
|             | 14   | ,00    | .                                           | .          | 10                     | 42                   |
|             | 15   | ,00    | .                                           | .          | 10                     | 41                   |
|             | 16   | ,00    | .                                           | .          | 10                     | 40                   |
|             | 17   | ,00    | .                                           | .          | 10                     | 39                   |
|             | 18   | ,00    | .                                           | .          | 10                     | 38                   |
|             | 19   | ,00    | .                                           | .          | 10                     | 37                   |
|             | 20   | ,00    | .                                           | .          | 10                     | 36                   |
|             | 21   | ,00    | .                                           | .          | 10                     | 35                   |
|             | 22   | ,00    | .                                           | .          | 10                     | 34                   |
|             | 23   | ,00    | .                                           | .          | 10                     | 33                   |
|             | 24   | ,00    | .                                           | .          | 10                     | 32                   |
|             | 25   | ,00    | .                                           | .          | 10                     | 31                   |
|             | 26   | ,00    | .                                           | .          | 10                     | 30                   |
|             | 27   | ,00    | .                                           | .          | 10                     | 29                   |
|             | 28   | ,00    | .                                           | .          | 10                     | 28                   |
|             | 29   | ,00    | .                                           | .          | 10                     | 27                   |
|             | 30   | ,00    | .                                           | .          | 10                     | 26                   |
|             | 31   | ,00    | .                                           | .          | 10                     | 25                   |
|             | 32   | ,00    | .                                           | .          | 10                     | 24                   |
|             | 33   | ,00    | .                                           | .          | 10                     | 23                   |
|             | 34   | ,00    | .                                           | .          | 10                     | 22                   |
|             | 35   | ,00    | .                                           | .          | 10                     | 21                   |
|             | 36   | ,00    | .                                           | .          | 10                     | 20                   |
|             | 37   | ,00    | .                                           | .          | 10                     | 19                   |
|             | 38   | ,00    | .                                           | .          | 10                     | 18                   |
|             | 39   | ,00    | .                                           | .          | 10                     | 17                   |
|             | 40   | ,00    | .                                           | .          | 10                     | 16                   |
|             | 41   | ,00    | .                                           | .          | 10                     | 15                   |
|             | 42   | ,00    | .                                           | .          | 10                     | 14                   |
|             | 43   | ,00    | .                                           | .          | 10                     | 13                   |
|             | 44   | ,00    | .                                           | .          | 10                     | 12                   |
|             | 45   | ,00    | .                                           | .          | 10                     | 11                   |
|             | 46   | ,00    | .                                           | .          | 10                     | 10                   |
|             | 47   | ,00    | .                                           | .          | 10                     | 9                    |
|             | 48   | ,00    | .                                           | .          | 10                     | 8                    |
|             | 49   | ,00    | .                                           | .          | 10                     | 7                    |

Survival Table

| Gastrostomy | Time   | Status | Cumulative Proportion Surviving at the Time |            | N of Cumulative Events | N of Remaining Cases |
|-------------|--------|--------|---------------------------------------------|------------|------------------------|----------------------|
|             |        |        | Estimate                                    | Std. Error |                        |                      |
| 50          | 30,000 | ,00    | .                                           | .          | 10                     | 6                    |
| 51          | 30,000 | ,00    | .                                           | .          | 10                     | 5                    |
| 52          | 30,000 | ,00    | .                                           | .          | 10                     | 4                    |
| 53          | 30,000 | ,00    | .                                           | .          | 10                     | 3                    |
| 54          | 30,000 | ,00    | .                                           | .          | 10                     | 2                    |
| 55          | 30,000 | ,00    | .                                           | .          | 10                     | 1                    |
| 56          | 30,000 | ,00    | .                                           | .          | 10                     | 0                    |
| 1,0         | 1      | 1,00   | ,833                                        | ,152       | 1                      | 5                    |
| 2           | 30,000 | ,00    | .                                           | .          | 1                      | 4                    |
| 3           | 30,000 | ,00    | .                                           | .          | 1                      | 3                    |
| 4           | 30,000 | ,00    | .                                           | .          | 1                      | 2                    |
| 5           | 30,000 | ,00    | .                                           | .          | 1                      | 1                    |
| 6           | 30,000 | ,00    | .                                           | .          | 1                      | 0                    |

Means and Medians for Survival Time

| Gastrostomy | Mean <sup>a</sup> |            |                         |             | Median   |            |             |
|-------------|-------------------|------------|-------------------------|-------------|----------|------------|-------------|
|             | Estimate          | Std. Error | 95% Confidence Interval |             | Estimate | Std. Error | 95% ...     |
|             |                   |            | Lower Bound             | Upper Bound |          |            | Lower Bound |
| ,0          | 27,125            | ,948       | 25,268                  | 28,982      | .        | .          | .           |
| 1,0         | 25,833            | 3,804      | 18,378                  | 33,288      | .        | .          | .           |
| Overall     | 27,000            | ,933       | 25,171                  | 28,829      | .        | .          | .           |

Means and Medians for Survival Time

| Gastrostomy | Median      |
|-------------|-------------|
|             | 95% ...     |
|             | Upper Bound |
| ,0          | .           |
| 1,0         | .           |
| Overall     | .           |

a. Estimation is limited to the largest survival time if it is censored.

Overall Comparisons

|                       | Chi-Square | df | Sig. |
|-----------------------|------------|----|------|
| Log Rank (Mantel-Cox) | ,000       | 1  | ,998 |

Test of equality of survival distributions for the different levels of Gastrostomy



### Survival Functions

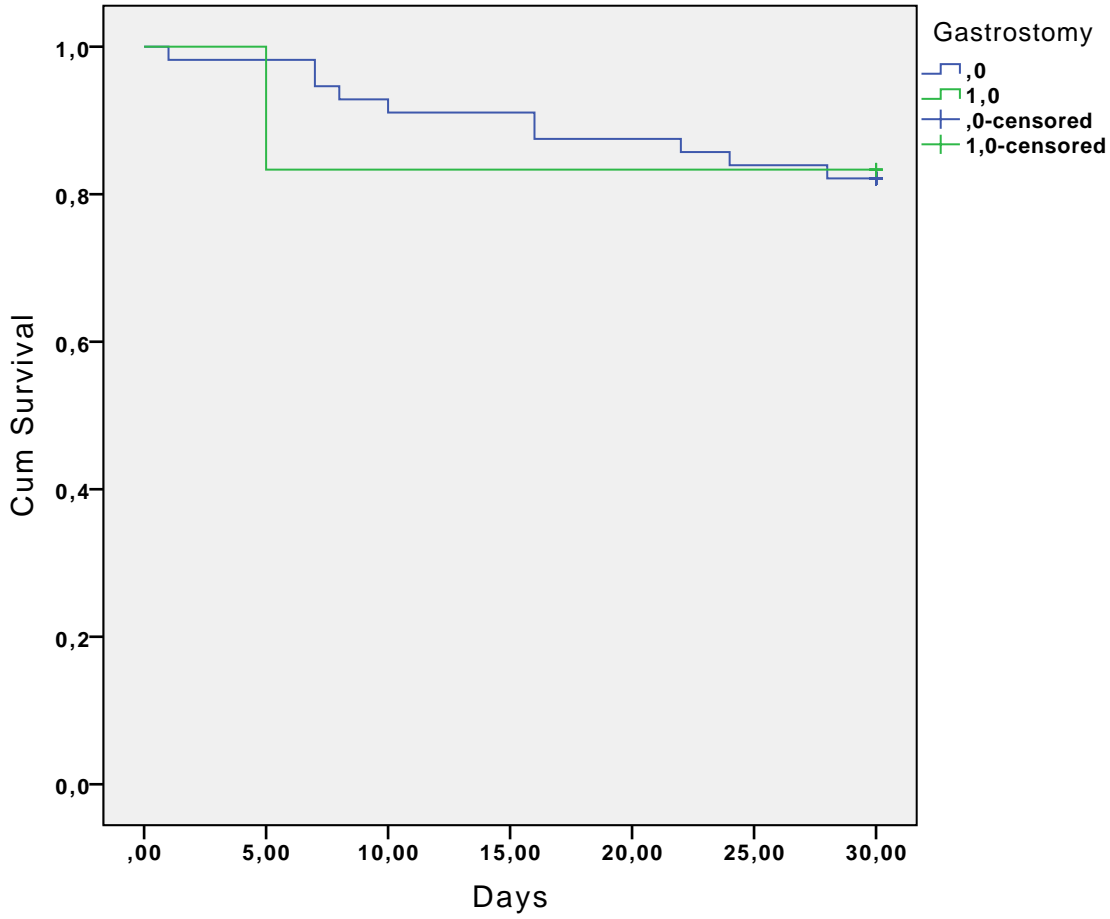

### COGNITIVE IMPAIRMENT (0=NO, 1=YES)

#### Case Processing Summary

| Cognitive Impairment | Total N | N of Events | Censored |         |
|----------------------|---------|-------------|----------|---------|
|                      |         |             | N        | Percent |
| ,0                   | 39      | 5           | 34       | 87,2%   |
| 1,0                  | 23      | 6           | 17       | 73,9%   |
| Overall              | 62      | 11          | 51       | 82,3%   |

Survival Table

| Cognitive Impairment | Time | Status | Cumulative Proportion Surviving at the Time |            | N of Cumulative Events | N of Remaining Cases |
|----------------------|------|--------|---------------------------------------------|------------|------------------------|----------------------|
|                      |      |        | Estimate                                    | Std. Error |                        |                      |
| ,0                   | 1    | 1,00   | ,974                                        | ,025       | 1                      | 38                   |
|                      | 2    | 1,00   | .                                           | .          | 2                      | 37                   |
|                      | 3    | 1,00   | ,923                                        | ,043       | 3                      | 36                   |
|                      | 4    | 1,00   | ,897                                        | ,049       | 4                      | 35                   |
|                      | 5    | 1,00   | ,872                                        | ,054       | 5                      | 34                   |
|                      | 6    | ,00    | .                                           | .          | 5                      | 33                   |
|                      | 7    | ,00    | .                                           | .          | 5                      | 32                   |
|                      | 8    | ,00    | .                                           | .          | 5                      | 31                   |
|                      | 9    | ,00    | .                                           | .          | 5                      | 30                   |
|                      | 10   | ,00    | .                                           | .          | 5                      | 29                   |
|                      | 11   | ,00    | .                                           | .          | 5                      | 28                   |
|                      | 12   | ,00    | .                                           | .          | 5                      | 27                   |
|                      | 13   | ,00    | .                                           | .          | 5                      | 26                   |
|                      | 14   | ,00    | .                                           | .          | 5                      | 25                   |
|                      | 15   | ,00    | .                                           | .          | 5                      | 24                   |
|                      | 16   | ,00    | .                                           | .          | 5                      | 23                   |
|                      | 17   | ,00    | .                                           | .          | 5                      | 22                   |
|                      | 18   | ,00    | .                                           | .          | 5                      | 21                   |
|                      | 19   | ,00    | .                                           | .          | 5                      | 20                   |
|                      | 20   | ,00    | .                                           | .          | 5                      | 19                   |
|                      | 21   | ,00    | .                                           | .          | 5                      | 18                   |
|                      | 22   | ,00    | .                                           | .          | 5                      | 17                   |
|                      | 23   | ,00    | .                                           | .          | 5                      | 16                   |
|                      | 24   | ,00    | .                                           | .          | 5                      | 15                   |
|                      | 25   | ,00    | .                                           | .          | 5                      | 14                   |
|                      | 26   | ,00    | .                                           | .          | 5                      | 13                   |
|                      | 27   | ,00    | .                                           | .          | 5                      | 12                   |
|                      | 28   | ,00    | .                                           | .          | 5                      | 11                   |
|                      | 29   | ,00    | .                                           | .          | 5                      | 10                   |
|                      | 30   | ,00    | .                                           | .          | 5                      | 9                    |
|                      | 31   | ,00    | .                                           | .          | 5                      | 8                    |
|                      | 32   | ,00    | .                                           | .          | 5                      | 7                    |
|                      | 33   | ,00    | .                                           | .          | 5                      | 6                    |
|                      | 34   | ,00    | .                                           | .          | 5                      | 5                    |
|                      | 35   | ,00    | .                                           | .          | 5                      | 4                    |
|                      | 36   | ,00    | .                                           | .          | 5                      | 3                    |
|                      | 37   | ,00    | .                                           | .          | 5                      | 2                    |
|                      | 38   | ,00    | .                                           | .          | 5                      | 1                    |
|                      | 39   | ,00    | .                                           | .          | 5                      | 0                    |
| 1,0                  | 1    | 1,00   | ,957                                        | ,043       | 1                      | 22                   |
|                      | 2    | 1,00   | ,913                                        | ,059       | 2                      | 21                   |
|                      | 3    | 1,00   | ,870                                        | ,070       | 3                      | 20                   |
|                      | 4    | 1,00   | ,826                                        | ,079       | 4                      | 19                   |
|                      | 5    | 1,00   | ,783                                        | ,086       | 5                      | 18                   |
|                      | 6    | 1,00   | ,739                                        | ,092       | 6                      | 17                   |
|                      | 7    | ,00    | .                                           | .          | 6                      | 16                   |
|                      | 8    | ,00    | .                                           | .          | 6                      | 15                   |
|                      | 9    | ,00    | .                                           | .          | 6                      | 14                   |
|                      | 10   | ,00    | .                                           | .          | 6                      | 13                   |

**Survival Table**

| Cognitive Impairment | Time   | Status | Cumulative Proportion Surviving at the Time |            | N of Cumulative Events | N of Remaining Cases |
|----------------------|--------|--------|---------------------------------------------|------------|------------------------|----------------------|
|                      |        |        | Estimate                                    | Std. Error |                        |                      |
| 11                   | 30,000 | ,00    | .                                           | .          | 6                      | 12                   |
| 12                   | 30,000 | ,00    | .                                           | .          | 6                      | 11                   |
| 13                   | 30,000 | ,00    | .                                           | .          | 6                      | 10                   |
| 14                   | 30,000 | ,00    | .                                           | .          | 6                      | 9                    |
| 15                   | 30,000 | ,00    | .                                           | .          | 6                      | 8                    |
| 16                   | 30,000 | ,00    | .                                           | .          | 6                      | 7                    |
| 17                   | 30,000 | ,00    | .                                           | .          | 6                      | 6                    |
| 18                   | 30,000 | ,00    | .                                           | .          | 6                      | 5                    |
| 19                   | 30,000 | ,00    | .                                           | .          | 6                      | 4                    |
| 20                   | 30,000 | ,00    | .                                           | .          | 6                      | 3                    |
| 21                   | 30,000 | ,00    | .                                           | .          | 6                      | 2                    |
| 22                   | 30,000 | ,00    | .                                           | .          | 6                      | 1                    |
| 23                   | 30,000 | ,00    | .                                           | .          | 6                      | 0                    |

**Means and Medians for Survival Time**

| Cognitive Impairment | Mean <sup>a</sup> |            |                         |             | Median   |            |             |
|----------------------|-------------------|------------|-------------------------|-------------|----------|------------|-------------|
|                      | Estimate          | Std. Error | 95% Confidence Interval |             | Estimate | Std. Error | 95% ...     |
|                      |                   |            | Lower Bound             | Upper Bound |          |            | Lower Bound |
| ,0                   | 27,205            | 1,200      | 24,853                  | 29,557      | .        | .          | .           |
| 1,0                  | 26,652            | 1,475      | 23,761                  | 29,544      | .        | .          | .           |
| Overall              | 27,000            | ,933       | 25,171                  | 28,829      | .        | .          | .           |

**Means and Medians for Survival Time**

| Cognitive Impairment | Median      |
|----------------------|-------------|
|                      | 95% ...     |
|                      | Upper Bound |
| ,0                   | .           |
| 1,0                  | .           |
| Overall              | .           |

a. Estimation is limited to the largest survival time if it is censored.

**Overall Comparisons**

|                       | Chi-Square | df | Sig. |
|-----------------------|------------|----|------|
| Log Rank (Mantel-Cox) | 1,489      | 1  | ,222 |

Test of equality of survival distributions for the different levels of Cognitive Impairment

### Survival Functions

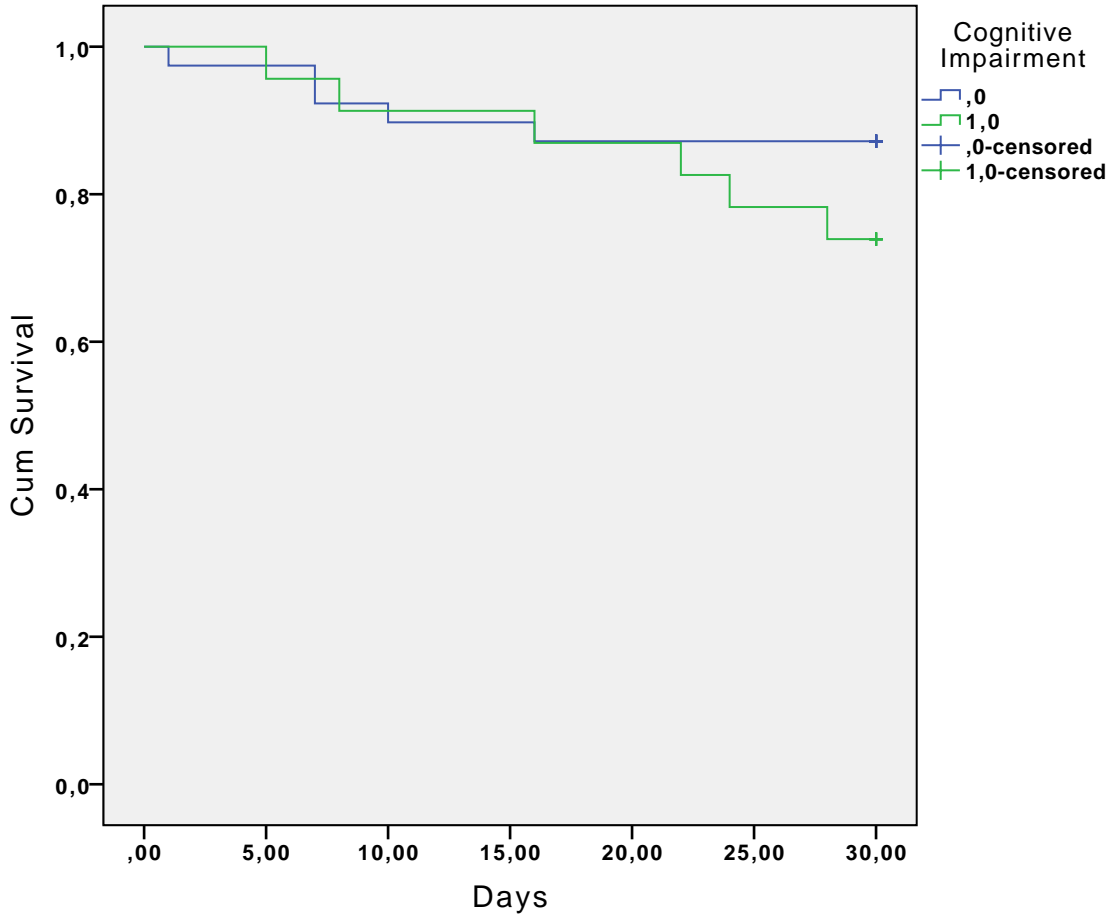

### SOLID ORGAN CANCER (0=NO, 1=YES)

#### Case Processing Summary

| Solid Organ Cancer | Total N | N of Events | Censored |         |
|--------------------|---------|-------------|----------|---------|
|                    |         |             | N        | Percent |
| ,0                 | 48      | 8           | 40       | 83,3%   |
| 1,0                | 14      | 3           | 11       | 78,6%   |
| Overall            | 62      | 11          | 51       | 82,3%   |

Survival Table

| Solid Organ Cancer | Time | Status | Cumulative Proportion Surviving at the Time |            | N of Cumulative Events | N of Remaining Cases |
|--------------------|------|--------|---------------------------------------------|------------|------------------------|----------------------|
|                    |      |        | Estimate                                    | Std. Error |                        |                      |
| ,0                 | 1    | 1,00   | ,979                                        | ,021       | 1                      | 47                   |
|                    | 2    | 1,00   | ,958                                        | ,029       | 2                      | 46                   |
|                    | 3    | 1,00   | .                                           | .          | 3                      | 45                   |
|                    | 4    | 1,00   | ,917                                        | ,040       | 4                      | 44                   |
|                    | 5    | 1,00   | ,896                                        | ,044       | 5                      | 43                   |
|                    | 6    | 1,00   | .                                           | .          | 6                      | 42                   |
|                    | 7    | 1,00   | ,854                                        | ,051       | 7                      | 41                   |
|                    | 8    | 1,00   | ,833                                        | ,054       | 8                      | 40                   |
|                    | 9    | ,00    | .                                           | .          | 8                      | 39                   |
|                    | 10   | ,00    | .                                           | .          | 8                      | 38                   |
|                    | 11   | ,00    | .                                           | .          | 8                      | 37                   |
|                    | 12   | ,00    | .                                           | .          | 8                      | 36                   |
|                    | 13   | ,00    | .                                           | .          | 8                      | 35                   |
|                    | 14   | ,00    | .                                           | .          | 8                      | 34                   |
|                    | 15   | ,00    | .                                           | .          | 8                      | 33                   |
|                    | 16   | ,00    | .                                           | .          | 8                      | 32                   |
|                    | 17   | ,00    | .                                           | .          | 8                      | 31                   |
|                    | 18   | ,00    | .                                           | .          | 8                      | 30                   |
|                    | 19   | ,00    | .                                           | .          | 8                      | 29                   |
|                    | 20   | ,00    | .                                           | .          | 8                      | 28                   |
|                    | 21   | ,00    | .                                           | .          | 8                      | 27                   |
|                    | 22   | ,00    | .                                           | .          | 8                      | 26                   |
|                    | 23   | ,00    | .                                           | .          | 8                      | 25                   |
|                    | 24   | ,00    | .                                           | .          | 8                      | 24                   |
|                    | 25   | ,00    | .                                           | .          | 8                      | 23                   |
|                    | 26   | ,00    | .                                           | .          | 8                      | 22                   |
|                    | 27   | ,00    | .                                           | .          | 8                      | 21                   |
|                    | 28   | ,00    | .                                           | .          | 8                      | 20                   |
|                    | 29   | ,00    | .                                           | .          | 8                      | 19                   |
|                    | 30   | ,00    | .                                           | .          | 8                      | 18                   |
|                    | 31   | ,00    | .                                           | .          | 8                      | 17                   |
|                    | 32   | ,00    | .                                           | .          | 8                      | 16                   |
|                    | 33   | ,00    | .                                           | .          | 8                      | 15                   |
|                    | 34   | ,00    | .                                           | .          | 8                      | 14                   |
|                    | 35   | ,00    | .                                           | .          | 8                      | 13                   |
|                    | 36   | ,00    | .                                           | .          | 8                      | 12                   |
|                    | 37   | ,00    | .                                           | .          | 8                      | 11                   |
|                    | 38   | ,00    | .                                           | .          | 8                      | 10                   |
|                    | 39   | ,00    | .                                           | .          | 8                      | 9                    |
|                    | 40   | ,00    | .                                           | .          | 8                      | 8                    |
|                    | 41   | ,00    | .                                           | .          | 8                      | 7                    |
|                    | 42   | ,00    | .                                           | .          | 8                      | 6                    |
|                    | 43   | ,00    | .                                           | .          | 8                      | 5                    |
|                    | 44   | ,00    | .                                           | .          | 8                      | 4                    |
|                    | 45   | ,00    | .                                           | .          | 8                      | 3                    |
|                    | 46   | ,00    | .                                           | .          | 8                      | 2                    |
|                    | 47   | ,00    | .                                           | .          | 8                      | 1                    |
|                    | 48   | ,00    | .                                           | .          | 8                      | 0                    |

Survival Table

| Solid Organ Cancer | Time | Status | Cumulative Proportion Surviving at the Time |            | N of Cumulative Events | N of Remaining Cases |    |
|--------------------|------|--------|---------------------------------------------|------------|------------------------|----------------------|----|
|                    |      |        | Estimate                                    | Std. Error |                        |                      |    |
| 1,0                | 1    | 10,000 | 1,00                                        | ,929       | ,069                   | 1                    | 13 |
|                    | 2    | 22,000 | 1,00                                        | ,857       | ,094                   | 2                    | 12 |
|                    | 3    | 24,000 | 1,00                                        | ,786       | ,110                   | 3                    | 11 |
|                    | 4    | 30,000 | ,00                                         | .          | .                      | 3                    | 10 |
|                    | 5    | 30,000 | ,00                                         | .          | .                      | 3                    | 9  |
|                    | 6    | 30,000 | ,00                                         | .          | .                      | 3                    | 8  |
|                    | 7    | 30,000 | ,00                                         | .          | .                      | 3                    | 7  |
|                    | 8    | 30,000 | ,00                                         | .          | .                      | 3                    | 6  |
|                    | 9    | 30,000 | ,00                                         | .          | .                      | 3                    | 5  |
|                    | 10   | 30,000 | ,00                                         | .          | .                      | 3                    | 4  |
|                    | 11   | 30,000 | ,00                                         | .          | .                      | 3                    | 3  |
|                    | 12   | 30,000 | ,00                                         | .          | .                      | 3                    | 2  |
|                    | 13   | 30,000 | ,00                                         | .          | .                      | 3                    | 1  |
|                    | 14   | 30,000 | ,00                                         | .          | .                      | 3                    | 0  |

Means and Medians for Survival Time

| Solid Organ Cancer | Mean <sup>a</sup> |            |                         |             | Median   |            |             |
|--------------------|-------------------|------------|-------------------------|-------------|----------|------------|-------------|
|                    | Estimate          | Std. Error | 95% Confidence Interval |             | Estimate | Std. Error | 95% ...     |
|                    |                   |            | Lower Bound             | Upper Bound |          |            | Lower Bound |
| ,0                 | 26,833            | 1,126      | 24,626                  | 29,041      | .        | .          | .           |
| 1,0                | 27,571            | 1,459      | 24,711                  | 30,432      | .        | .          | .           |
| Overall            | 27,000            | ,933       | 25,171                  | 28,829      | .        | .          | .           |

Means and Medians for Survival Time

| Solid Organ Cancer | Median      |
|--------------------|-------------|
|                    | 95% ...     |
|                    | Upper Bound |
| ,0                 | .           |
| 1,0                | .           |
| Overall            | .           |

a. Estimation is limited to the largest survival time if it is censored.

Overall Comparisons

|                       | Chi-Square | df | Sig. |
|-----------------------|------------|----|------|
| Log Rank (Mantel-Cox) | ,103       | 1  | ,748 |

Test of equality of survival distributions for the different levels of Solid Organ Cancer

### Survival Functions

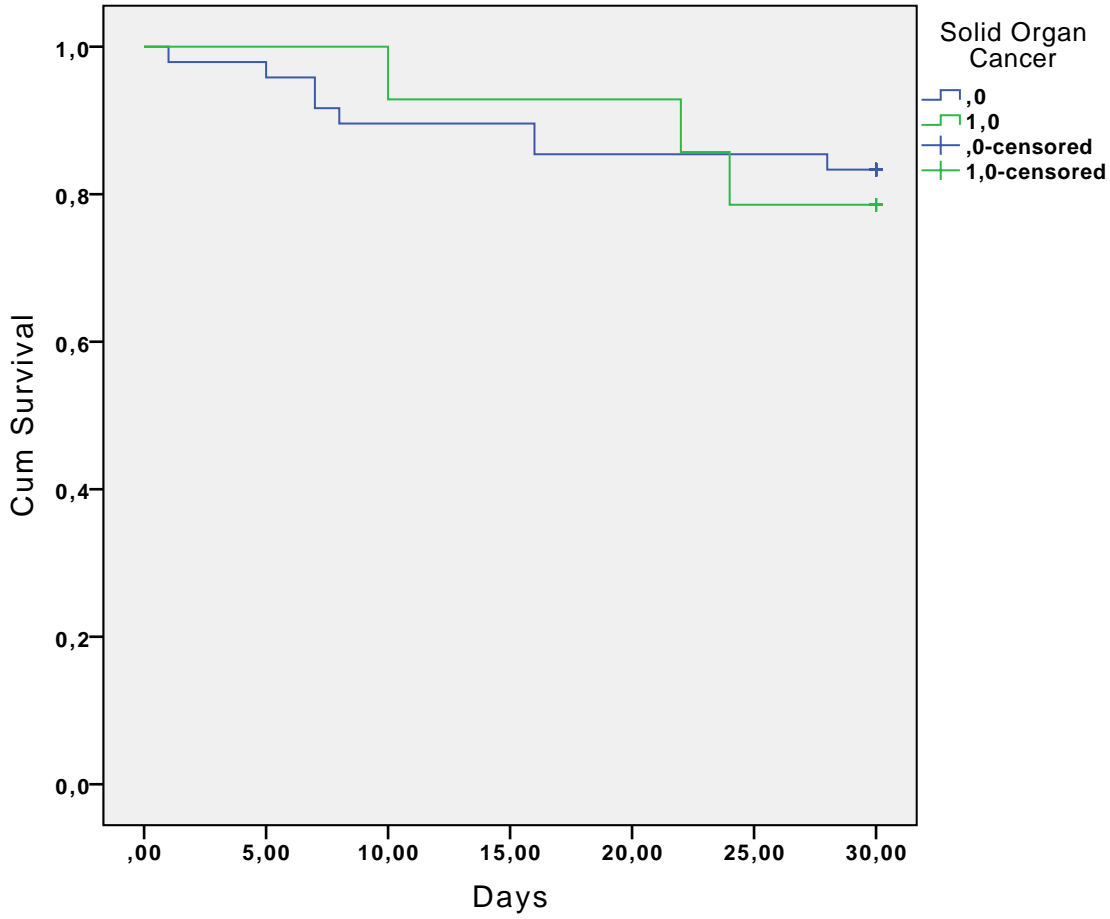

### LEUKEMIA (0=NO, 1=YES)

#### Warnings

No statistics are computed because all cases are censored.

#### Case Processing Summary

| Leukemia       | Total N   | N of Events | Censored  |              |
|----------------|-----------|-------------|-----------|--------------|
|                |           |             | N         | Percent      |
| ,0             | 61        | 11          | 50        | 82,0%        |
| 1,0            | 1         | 0           | 1         | 100,0%       |
| <b>Overall</b> | <b>62</b> | <b>11</b>   | <b>51</b> | <b>82,3%</b> |

Survival Table

| Leukemia | Time | Status | Cumulative Proportion Surviving at the Time |            | N of Cumulative Events | N of Remaining Cases |
|----------|------|--------|---------------------------------------------|------------|------------------------|----------------------|
|          |      |        | Estimate                                    | Std. Error |                        |                      |
| ,0       | 1    | 1,00   | ,984                                        | ,016       | 1                      | 60                   |
|          | 2    | 1,00   | ,967                                        | ,023       | 2                      | 59                   |
|          | 3    | 1,00   | .                                           | .          | 3                      | 58                   |
|          | 4    | 1,00   | ,934                                        | ,032       | 4                      | 57                   |
|          | 5    | 1,00   | ,918                                        | ,035       | 5                      | 56                   |
|          | 6    | 1,00   | ,902                                        | ,038       | 6                      | 55                   |
|          | 7    | 1,00   | .                                           | .          | 7                      | 54                   |
|          | 8    | 1,00   | ,869                                        | ,043       | 8                      | 53                   |
|          | 9    | 1,00   | ,852                                        | ,045       | 9                      | 52                   |
|          | 10   | 1,00   | ,836                                        | ,047       | 10                     | 51                   |
|          | 11   | 1,00   | ,820                                        | ,049       | 11                     | 50                   |
|          | 12   | ,00    | .                                           | .          | 11                     | 49                   |
|          | 13   | ,00    | .                                           | .          | 11                     | 48                   |
|          | 14   | ,00    | .                                           | .          | 11                     | 47                   |
|          | 15   | ,00    | .                                           | .          | 11                     | 46                   |
|          | 16   | ,00    | .                                           | .          | 11                     | 45                   |
|          | 17   | ,00    | .                                           | .          | 11                     | 44                   |
|          | 18   | ,00    | .                                           | .          | 11                     | 43                   |
|          | 19   | ,00    | .                                           | .          | 11                     | 42                   |
|          | 20   | ,00    | .                                           | .          | 11                     | 41                   |
|          | 21   | ,00    | .                                           | .          | 11                     | 40                   |
|          | 22   | ,00    | .                                           | .          | 11                     | 39                   |
|          | 23   | ,00    | .                                           | .          | 11                     | 38                   |
|          | 24   | ,00    | .                                           | .          | 11                     | 37                   |
|          | 25   | ,00    | .                                           | .          | 11                     | 36                   |
|          | 26   | ,00    | .                                           | .          | 11                     | 35                   |
|          | 27   | ,00    | .                                           | .          | 11                     | 34                   |
|          | 28   | ,00    | .                                           | .          | 11                     | 33                   |
|          | 29   | ,00    | .                                           | .          | 11                     | 32                   |
|          | 30   | ,00    | .                                           | .          | 11                     | 31                   |
|          | 31   | ,00    | .                                           | .          | 11                     | 30                   |
|          | 32   | ,00    | .                                           | .          | 11                     | 29                   |
|          | 33   | ,00    | .                                           | .          | 11                     | 28                   |
|          | 34   | ,00    | .                                           | .          | 11                     | 27                   |
|          | 35   | ,00    | .                                           | .          | 11                     | 26                   |
|          | 36   | ,00    | .                                           | .          | 11                     | 25                   |
|          | 37   | ,00    | .                                           | .          | 11                     | 24                   |
|          | 38   | ,00    | .                                           | .          | 11                     | 23                   |
|          | 39   | ,00    | .                                           | .          | 11                     | 22                   |
|          | 40   | ,00    | .                                           | .          | 11                     | 21                   |
|          | 41   | ,00    | .                                           | .          | 11                     | 20                   |
|          | 42   | ,00    | .                                           | .          | 11                     | 19                   |
|          | 43   | ,00    | .                                           | .          | 11                     | 18                   |
|          | 44   | ,00    | .                                           | .          | 11                     | 17                   |
|          | 45   | ,00    | .                                           | .          | 11                     | 16                   |
|          | 46   | ,00    | .                                           | .          | 11                     | 15                   |
|          | 47   | ,00    | .                                           | .          | 11                     | 14                   |
|          | 48   | ,00    | .                                           | .          | 11                     | 13                   |
|          | 49   | ,00    | .                                           | .          | 11                     | 12                   |



Survival Table

| Leukemia | Time   | Status | Cumulative Proportion Surviving at the Time |            | N of Cumulative Events | N of Remaining Cases |
|----------|--------|--------|---------------------------------------------|------------|------------------------|----------------------|
|          |        |        | Estimate                                    | Std. Error |                        |                      |
| 50       | 30,000 | ,00    | .                                           | .          | 11                     | 11                   |
| 51       | 30,000 | ,00    | .                                           | .          | 11                     | 10                   |
| 52       | 30,000 | ,00    | .                                           | .          | 11                     | 9                    |
| 53       | 30,000 | ,00    | .                                           | .          | 11                     | 8                    |
| 54       | 30,000 | ,00    | .                                           | .          | 11                     | 7                    |
| 55       | 30,000 | ,00    | .                                           | .          | 11                     | 6                    |
| 56       | 30,000 | ,00    | .                                           | .          | 11                     | 5                    |
| 57       | 30,000 | ,00    | .                                           | .          | 11                     | 4                    |
| 58       | 30,000 | ,00    | .                                           | .          | 11                     | 3                    |
| 59       | 30,000 | ,00    | .                                           | .          | 11                     | 2                    |
| 60       | 30,000 | ,00    | .                                           | .          | 11                     | 1                    |
| 61       | 30,000 | ,00    | .                                           | .          | 11                     | 0                    |

Overall Comparisons

|                       | Chi-Square | df | Sig. |
|-----------------------|------------|----|------|
| Log Rank (Mantel-Cox) | ,198       | 1  | ,657 |

Test of equality of survival distributions for the different levels of Leukemia

Survival Functions

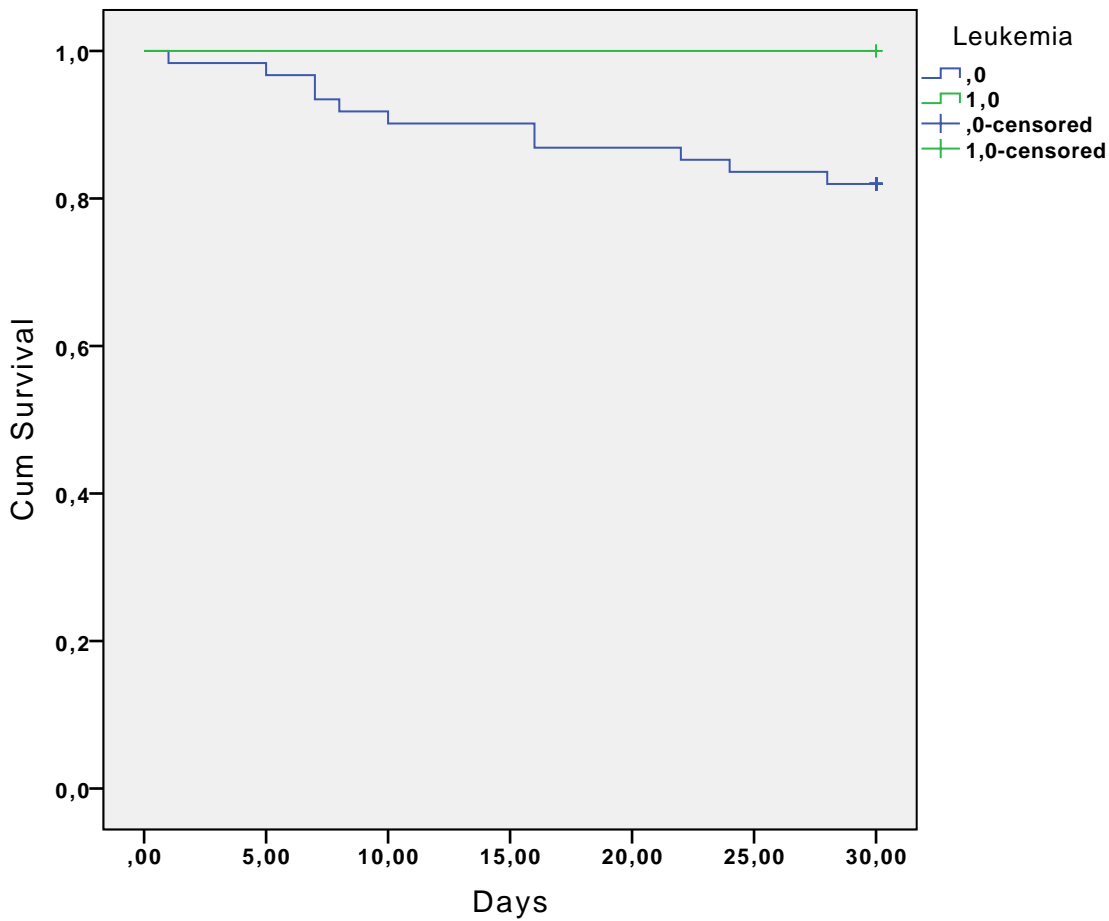

LIVER DISEASE (0=NO, 1=YES)

Case Processing Summary

| Liver Disease | Total N | N of Events | Censored |         |
|---------------|---------|-------------|----------|---------|
|               |         |             | N        | Percent |
| ,0            | 54      | 8           | 46       | 85,2%   |
| 1,0           | 8       | 3           | 5        | 62,5%   |
| Overall       | 62      | 11          | 51       | 82,3%   |

Survival Table

| Liver Disease | Time | Status | Cumulative Proportion Surviving at the Time |            | N of Cumulative Events | N of Remaining Cases |
|---------------|------|--------|---------------------------------------------|------------|------------------------|----------------------|
|               |      |        | Estimate                                    | Std. Error |                        |                      |
| ,0            | 1    | 1,00   | ,981                                        | ,018       | 1                      | 53                   |
|               | 2    | 1,00   | ,963                                        | ,026       | 2                      | 52                   |
|               | 3    | 1,00   | ,944                                        | ,031       | 3                      | 51                   |
|               | 4    | 1,00   | .                                           | .          | 4                      | 50                   |
|               | 5    | 1,00   | ,907                                        | ,039       | 5                      | 49                   |
|               | 6    | 1,00   | ,889                                        | ,043       | 6                      | 48                   |
|               | 7    | 1,00   | ,870                                        | ,046       | 7                      | 47                   |
|               | 8    | 1,00   | ,852                                        | ,048       | 8                      | 46                   |
|               | 9    | ,00    | .                                           | .          | 8                      | 45                   |
|               | 10   | ,00    | .                                           | .          | 8                      | 44                   |
|               | 11   | ,00    | .                                           | .          | 8                      | 43                   |
|               | 12   | ,00    | .                                           | .          | 8                      | 42                   |
|               | 13   | ,00    | .                                           | .          | 8                      | 41                   |
|               | 14   | ,00    | .                                           | .          | 8                      | 40                   |
|               | 15   | ,00    | .                                           | .          | 8                      | 39                   |
|               | 16   | ,00    | .                                           | .          | 8                      | 38                   |
|               | 17   | ,00    | .                                           | .          | 8                      | 37                   |
|               | 18   | ,00    | .                                           | .          | 8                      | 36                   |
|               | 19   | ,00    | .                                           | .          | 8                      | 35                   |
|               | 20   | ,00    | .                                           | .          | 8                      | 34                   |
|               | 21   | ,00    | .                                           | .          | 8                      | 33                   |
|               | 22   | ,00    | .                                           | .          | 8                      | 32                   |
|               | 23   | ,00    | .                                           | .          | 8                      | 31                   |
|               | 24   | ,00    | .                                           | .          | 8                      | 30                   |
|               | 25   | ,00    | .                                           | .          | 8                      | 29                   |
|               | 26   | ,00    | .                                           | .          | 8                      | 28                   |
|               | 27   | ,00    | .                                           | .          | 8                      | 27                   |
|               | 28   | ,00    | .                                           | .          | 8                      | 26                   |
|               | 29   | ,00    | .                                           | .          | 8                      | 25                   |
|               | 30   | ,00    | .                                           | .          | 8                      | 24                   |
|               | 31   | ,00    | .                                           | .          | 8                      | 23                   |
|               | 32   | ,00    | .                                           | .          | 8                      | 22                   |
|               | 33   | ,00    | .                                           | .          | 8                      | 21                   |
|               | 34   | ,00    | .                                           | .          | 8                      | 20                   |
|               | 35   | ,00    | .                                           | .          | 8                      | 19                   |
|               | 36   | ,00    | .                                           | .          | 8                      | 18                   |
|               | 37   | ,00    | .                                           | .          | 8                      | 17                   |
|               | 38   | ,00    | .                                           | .          | 8                      | 16                   |
|               | 39   | ,00    | .                                           | .          | 8                      | 15                   |
|               | 40   | ,00    | .                                           | .          | 8                      | 14                   |
|               | 41   | ,00    | .                                           | .          | 8                      | 13                   |
|               | 42   | ,00    | .                                           | .          | 8                      | 12                   |

Survival Table

| Liver Disease | Time   | Status | Cumulative Proportion Surviving at the Time |            | N of Cumulative Events | N of Remaining Cases |   |
|---------------|--------|--------|---------------------------------------------|------------|------------------------|----------------------|---|
|               |        |        | Estimate                                    | Std. Error |                        |                      |   |
| 43            | 30,000 | ,00    | .                                           | .          | 8                      | 11                   |   |
| 44            | 30,000 | ,00    | .                                           | .          | 8                      | 10                   |   |
| 45            | 30,000 | ,00    | .                                           | .          | 8                      | 9                    |   |
| 46            | 30,000 | ,00    | .                                           | .          | 8                      | 8                    |   |
| 47            | 30,000 | ,00    | .                                           | .          | 8                      | 7                    |   |
| 48            | 30,000 | ,00    | .                                           | .          | 8                      | 6                    |   |
| 49            | 30,000 | ,00    | .                                           | .          | 8                      | 5                    |   |
| 50            | 30,000 | ,00    | .                                           | .          | 8                      | 4                    |   |
| 51            | 30,000 | ,00    | .                                           | .          | 8                      | 3                    |   |
| 52            | 30,000 | ,00    | .                                           | .          | 8                      | 2                    |   |
| 53            | 30,000 | ,00    | .                                           | .          | 8                      | 1                    |   |
| 54            | 30,000 | ,00    | .                                           | .          | 8                      | 0                    |   |
| 1,0           | 1      | 5,000  | 1,00                                        | ,875       | ,117                   | 1                    | 7 |
|               | 2      | 7,000  | 1,00                                        | ,750       | ,153                   | 2                    | 6 |
|               | 3      | 10,000 | 1,00                                        | ,625       | ,171                   | 3                    | 5 |
|               | 4      | 30,000 | ,00                                         | .          | .                      | 3                    | 4 |
|               | 5      | 30,000 | ,00                                         | .          | .                      | 3                    | 3 |
|               | 6      | 30,000 | ,00                                         | .          | .                      | 3                    | 2 |
|               | 7      | 30,000 | ,00                                         | .          | .                      | 3                    | 1 |
|               | 8      | 30,000 | ,00                                         | .          | .                      | 3                    | 0 |

Means and Medians for Survival Time

| Liver Disease | Mean <sup>a</sup> |            |                         |             | Median   |            |             |
|---------------|-------------------|------------|-------------------------|-------------|----------|------------|-------------|
|               | Estimate          | Std. Error | 95% Confidence Interval |             | Estimate | Std. Error | 95% ...     |
|               |                   |            | Lower Bound             | Upper Bound |          |            | Lower Bound |
| ,0            | 27,815            | ,847       | 26,155                  | 29,475      | .        | .          | .           |
| 1,0           | 21,500            | 3,905      | 13,846                  | 29,154      | .        | .          | .           |
| Overall       | 27,000            | ,933       | 25,171                  | 28,829      | .        | .          | .           |

Means and Medians for Survival Time

| Liver Disease | Median      |
|---------------|-------------|
|               | 95% ...     |
|               | Upper Bound |
| ,0            | .           |
| 1,0           | .           |
| Overall       | .           |

a. Estimation is limited to the largest survival time if it is censored.

Overall Comparisons

|                       | Chi-Square | df | Sig. |
|-----------------------|------------|----|------|
| Log Rank (Mantel-Cox) | 3,267      | 1  | ,071 |

Test of equality of survival distributions for the different levels of Liver Disease

### Survival Functions

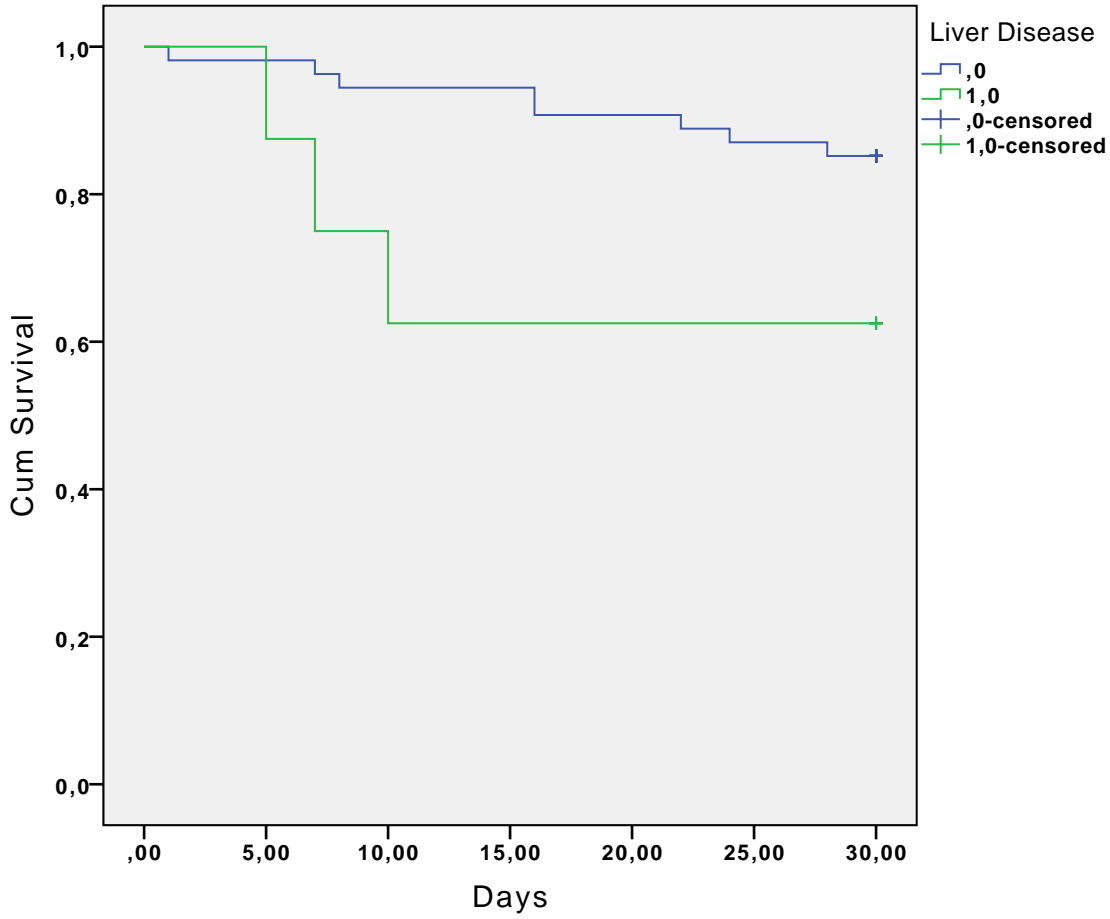

### LYMPHOMA (0=NO, 1=YES)

#### Warnings

No comparison analysis is performed because the factor variable has only one value for every stratum.

#### Case Processing Summary

| Lymphoma | Total N | N of Events | Censored |         |
|----------|---------|-------------|----------|---------|
|          |         |             | N        | Percent |
| ,0       | 62      | 11          | 51       | 82,3%   |
| Overall  | 62      | 11          | 51       | 82,3%   |

Survival Table

| Lymphoma | Time | Status | Cumulative Proportion Surviving at the Time |            | N of Cumulative Events | N of Remaining Cases |
|----------|------|--------|---------------------------------------------|------------|------------------------|----------------------|
|          |      |        | Estimate                                    | Std. Error |                        |                      |
| ,0       | 1    | 1,00   | ,984                                        | ,016       | 1                      | 61                   |
|          | 2    | 1,00   | ,968                                        | ,022       | 2                      | 60                   |
|          | 3    | 1,00   | .                                           | .          | 3                      | 59                   |
|          | 4    | 1,00   | ,935                                        | ,031       | 4                      | 58                   |
|          | 5    | 1,00   | ,919                                        | ,035       | 5                      | 57                   |
|          | 6    | 1,00   | ,903                                        | ,038       | 6                      | 56                   |
|          | 7    | 1,00   | .                                           | .          | 7                      | 55                   |
|          | 8    | 1,00   | ,871                                        | ,043       | 8                      | 54                   |
|          | 9    | 1,00   | ,855                                        | ,045       | 9                      | 53                   |
|          | 10   | 1,00   | ,839                                        | ,047       | 10                     | 52                   |
|          | 11   | 1,00   | ,823                                        | ,049       | 11                     | 51                   |
|          | 12   | ,00    | .                                           | .          | 11                     | 50                   |
|          | 13   | ,00    | .                                           | .          | 11                     | 49                   |
|          | 14   | ,00    | .                                           | .          | 11                     | 48                   |
|          | 15   | ,00    | .                                           | .          | 11                     | 47                   |
|          | 16   | ,00    | .                                           | .          | 11                     | 46                   |
|          | 17   | ,00    | .                                           | .          | 11                     | 45                   |
|          | 18   | ,00    | .                                           | .          | 11                     | 44                   |
|          | 19   | ,00    | .                                           | .          | 11                     | 43                   |
|          | 20   | ,00    | .                                           | .          | 11                     | 42                   |
|          | 21   | ,00    | .                                           | .          | 11                     | 41                   |
|          | 22   | ,00    | .                                           | .          | 11                     | 40                   |
|          | 23   | ,00    | .                                           | .          | 11                     | 39                   |
|          | 24   | ,00    | .                                           | .          | 11                     | 38                   |
|          | 25   | ,00    | .                                           | .          | 11                     | 37                   |
|          | 26   | ,00    | .                                           | .          | 11                     | 36                   |
|          | 27   | ,00    | .                                           | .          | 11                     | 35                   |
|          | 28   | ,00    | .                                           | .          | 11                     | 34                   |
|          | 29   | ,00    | .                                           | .          | 11                     | 33                   |
|          | 30   | ,00    | .                                           | .          | 11                     | 32                   |
|          | 31   | ,00    | .                                           | .          | 11                     | 31                   |
|          | 32   | ,00    | .                                           | .          | 11                     | 30                   |
|          | 33   | ,00    | .                                           | .          | 11                     | 29                   |
|          | 34   | ,00    | .                                           | .          | 11                     | 28                   |
|          | 35   | ,00    | .                                           | .          | 11                     | 27                   |
|          | 36   | ,00    | .                                           | .          | 11                     | 26                   |
|          | 37   | ,00    | .                                           | .          | 11                     | 25                   |
|          | 38   | ,00    | .                                           | .          | 11                     | 24                   |
|          | 39   | ,00    | .                                           | .          | 11                     | 23                   |
|          | 40   | ,00    | .                                           | .          | 11                     | 22                   |
|          | 41   | ,00    | .                                           | .          | 11                     | 21                   |
|          | 42   | ,00    | .                                           | .          | 11                     | 20                   |
|          | 43   | ,00    | .                                           | .          | 11                     | 19                   |
|          | 44   | ,00    | .                                           | .          | 11                     | 18                   |
|          | 45   | ,00    | .                                           | .          | 11                     | 17                   |
|          | 46   | ,00    | .                                           | .          | 11                     | 16                   |
|          | 47   | ,00    | .                                           | .          | 11                     | 15                   |
|          | 48   | ,00    | .                                           | .          | 11                     | 14                   |
|          | 49   | ,00    | .                                           | .          | 11                     | 13                   |

Survival Table

| Lymphoma | Time   | Status | Cumulative Proportion Surviving at the Time |            | N of Cumulative Events | N of Remaining Cases |
|----------|--------|--------|---------------------------------------------|------------|------------------------|----------------------|
|          |        |        | Estimate                                    | Std. Error |                        |                      |
| 50       | 30,000 | ,00    | .                                           | .          | 11                     | 12                   |
| 51       | 30,000 | ,00    | .                                           | .          | 11                     | 11                   |
| 52       | 30,000 | ,00    | .                                           | .          | 11                     | 10                   |
| 53       | 30,000 | ,00    | .                                           | .          | 11                     | 9                    |
| 54       | 30,000 | ,00    | .                                           | .          | 11                     | 8                    |
| 55       | 30,000 | ,00    | .                                           | .          | 11                     | 7                    |
| 56       | 30,000 | ,00    | .                                           | .          | 11                     | 6                    |
| 57       | 30,000 | ,00    | .                                           | .          | 11                     | 5                    |
| 58       | 30,000 | ,00    | .                                           | .          | 11                     | 4                    |
| 59       | 30,000 | ,00    | .                                           | .          | 11                     | 3                    |
| 60       | 30,000 | ,00    | .                                           | .          | 11                     | 2                    |
| 61       | 30,000 | ,00    | .                                           | .          | 11                     | 1                    |
| 62       | 30,000 | ,00    | .                                           | .          | 11                     | 0                    |

Means and Medians for Survival Time

| Lymphoma | Mean <sup>a</sup> |            |                         |             | Median   |            |                         |             |
|----------|-------------------|------------|-------------------------|-------------|----------|------------|-------------------------|-------------|
|          | Estimate          | Std. Error | 95% Confidence Interval |             | Estimate | Std. Error | 95% Confidence Interval |             |
|          |                   |            | Lower Bound             | Upper Bound |          |            | Lower Bound             | Upper Bound |
| ,0       | 27,000            | ,933       | 25,171                  | 28,829      | .        | .          | .                       | .           |
| Overall  | 27,000            | ,933       | 25,171                  | 28,829      | .        | .          | .                       | .           |

a. Estimation is limited to the largest survival time if it is censored.

Survival Function

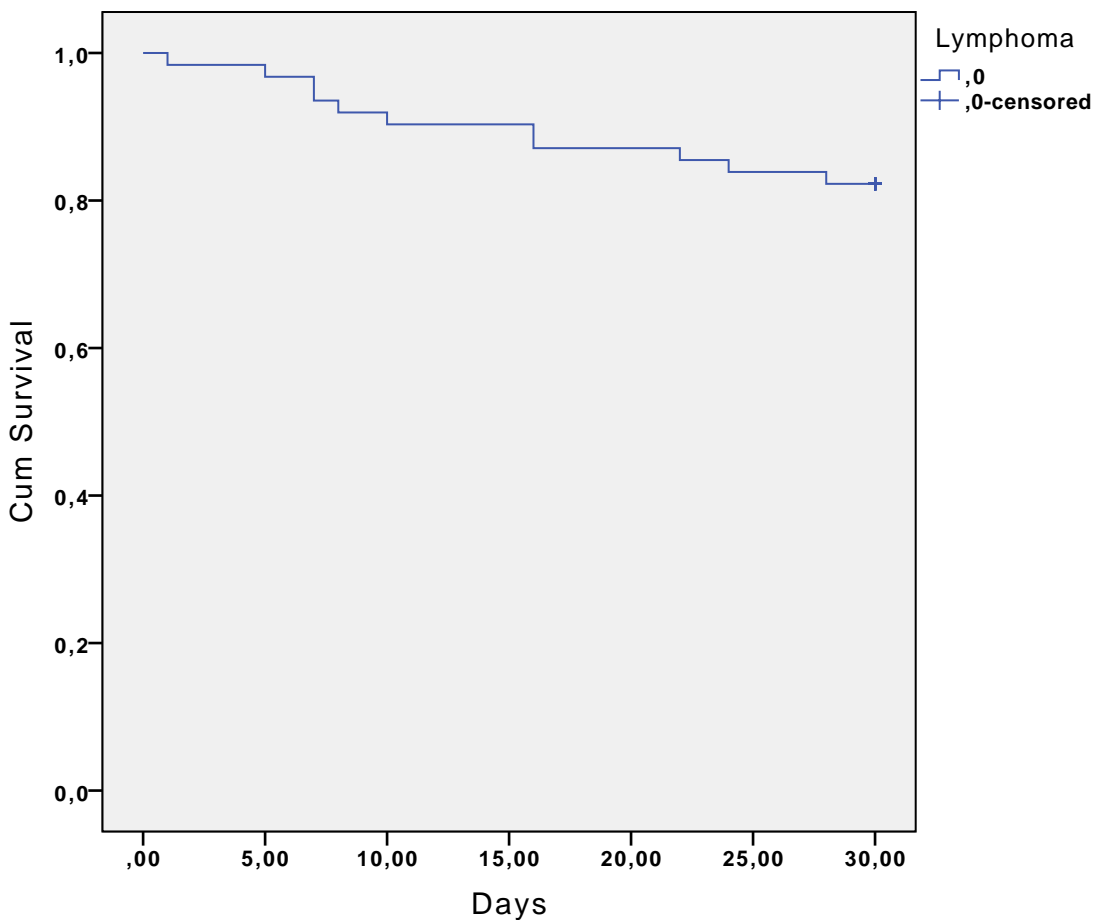

# METASTASIC CANCER (0=NO, 1=YES)

## Warnings

No statistics are computed because all cases are censored.

## Case Processing Summary

| Metastasic Cancer | Total N | N of Events | Censored |         |
|-------------------|---------|-------------|----------|---------|
|                   |         |             | N        | Percent |
| ,0                | 58      | 11          | 47       | 81,0%   |
| 1,0               | 4       | 0           | 4        | 100,0%  |
| Overall           | 62      | 11          | 51       | 82,3%   |

## Survival Table

| Metastasic Cancer | Time | Status | Cumulative Proportion Surviving at the Time |            | N of Cumulative Events | N of Remaining Cases |
|-------------------|------|--------|---------------------------------------------|------------|------------------------|----------------------|
|                   |      |        | Estimate                                    | Std. Error |                        |                      |
| ,0                | 1    | 1,00   | ,983                                        | ,017       | 1                      | 57                   |
|                   | 2    | 1,00   | ,966                                        | ,024       | 2                      | 56                   |
|                   | 3    | 1,00   | .                                           | .          | 3                      | 55                   |
|                   | 4    | 1,00   | ,931                                        | ,033       | 4                      | 54                   |
|                   | 5    | 1,00   | ,914                                        | ,037       | 5                      | 53                   |
|                   | 6    | 1,00   | ,897                                        | ,040       | 6                      | 52                   |
|                   | 7    | 1,00   | .                                           | .          | 7                      | 51                   |
|                   | 8    | 1,00   | ,862                                        | ,045       | 8                      | 50                   |
|                   | 9    | 1,00   | ,845                                        | ,048       | 9                      | 49                   |
|                   | 10   | 1,00   | ,828                                        | ,050       | 10                     | 48                   |
|                   | 11   | 1,00   | ,810                                        | ,051       | 11                     | 47                   |
|                   | 12   | ,00    | .                                           | .          | 11                     | 46                   |
|                   | 13   | ,00    | .                                           | .          | 11                     | 45                   |
|                   | 14   | ,00    | .                                           | .          | 11                     | 44                   |
|                   | 15   | ,00    | .                                           | .          | 11                     | 43                   |
|                   | 16   | ,00    | .                                           | .          | 11                     | 42                   |
|                   | 17   | ,00    | .                                           | .          | 11                     | 41                   |
|                   | 18   | ,00    | .                                           | .          | 11                     | 40                   |
|                   | 19   | ,00    | .                                           | .          | 11                     | 39                   |
|                   | 20   | ,00    | .                                           | .          | 11                     | 38                   |
|                   | 21   | ,00    | .                                           | .          | 11                     | 37                   |
|                   | 22   | ,00    | .                                           | .          | 11                     | 36                   |
|                   | 23   | ,00    | .                                           | .          | 11                     | 35                   |
|                   | 24   | ,00    | .                                           | .          | 11                     | 34                   |
|                   | 25   | ,00    | .                                           | .          | 11                     | 33                   |
|                   | 26   | ,00    | .                                           | .          | 11                     | 32                   |
|                   | 27   | ,00    | .                                           | .          | 11                     | 31                   |
|                   | 28   | ,00    | .                                           | .          | 11                     | 30                   |
|                   | 29   | ,00    | .                                           | .          | 11                     | 29                   |
|                   | 30   | ,00    | .                                           | .          | 11                     | 28                   |
|                   | 31   | ,00    | .                                           | .          | 11                     | 27                   |
|                   | 32   | ,00    | .                                           | .          | 11                     | 26                   |
|                   | 33   | ,00    | .                                           | .          | 11                     | 25                   |
|                   | 34   | ,00    | .                                           | .          | 11                     | 24                   |
|                   | 35   | ,00    | .                                           | .          | 11                     | 23                   |

Survival Table

| Metastatic Cancer | Time   | Status | Cumulative Proportion Surviving at the Time |            | N of Cumulative Events | N of Remaining Cases |
|-------------------|--------|--------|---------------------------------------------|------------|------------------------|----------------------|
|                   |        |        | Estimate                                    | Std. Error |                        |                      |
| 36                | 30,000 | ,00    | .                                           | .          | 11                     | 22                   |
| 37                | 30,000 | ,00    | .                                           | .          | 11                     | 21                   |
| 38                | 30,000 | ,00    | .                                           | .          | 11                     | 20                   |
| 39                | 30,000 | ,00    | .                                           | .          | 11                     | 19                   |
| 40                | 30,000 | ,00    | .                                           | .          | 11                     | 18                   |
| 41                | 30,000 | ,00    | .                                           | .          | 11                     | 17                   |
| 42                | 30,000 | ,00    | .                                           | .          | 11                     | 16                   |
| 43                | 30,000 | ,00    | .                                           | .          | 11                     | 15                   |
| 44                | 30,000 | ,00    | .                                           | .          | 11                     | 14                   |
| 45                | 30,000 | ,00    | .                                           | .          | 11                     | 13                   |
| 46                | 30,000 | ,00    | .                                           | .          | 11                     | 12                   |
| 47                | 30,000 | ,00    | .                                           | .          | 11                     | 11                   |
| 48                | 30,000 | ,00    | .                                           | .          | 11                     | 10                   |
| 49                | 30,000 | ,00    | .                                           | .          | 11                     | 9                    |
| 50                | 30,000 | ,00    | .                                           | .          | 11                     | 8                    |
| 51                | 30,000 | ,00    | .                                           | .          | 11                     | 7                    |
| 52                | 30,000 | ,00    | .                                           | .          | 11                     | 6                    |
| 53                | 30,000 | ,00    | .                                           | .          | 11                     | 5                    |
| 54                | 30,000 | ,00    | .                                           | .          | 11                     | 4                    |
| 55                | 30,000 | ,00    | .                                           | .          | 11                     | 3                    |
| 56                | 30,000 | ,00    | .                                           | .          | 11                     | 2                    |
| 57                | 30,000 | ,00    | .                                           | .          | 11                     | 1                    |
| 58                | 30,000 | ,00    | .                                           | .          | 11                     | 0                    |
| 1,0               | 1      | 30,000 | ,00                                         | .          | 0                      | 3                    |
|                   | 2      | 30,000 | ,00                                         | .          | 0                      | 2                    |
|                   | 3      | 30,000 | ,00                                         | .          | 0                      | 1                    |

## Overall Comparisons

|                       | Chi-Square | df | Sig. |
|-----------------------|------------|----|------|
| Log Rank (Mantel-Cox) | ,836       | 1  | ,361 |

Test of equality of survival distributions for the different levels of Metastatic Cancer



### Survival Functions

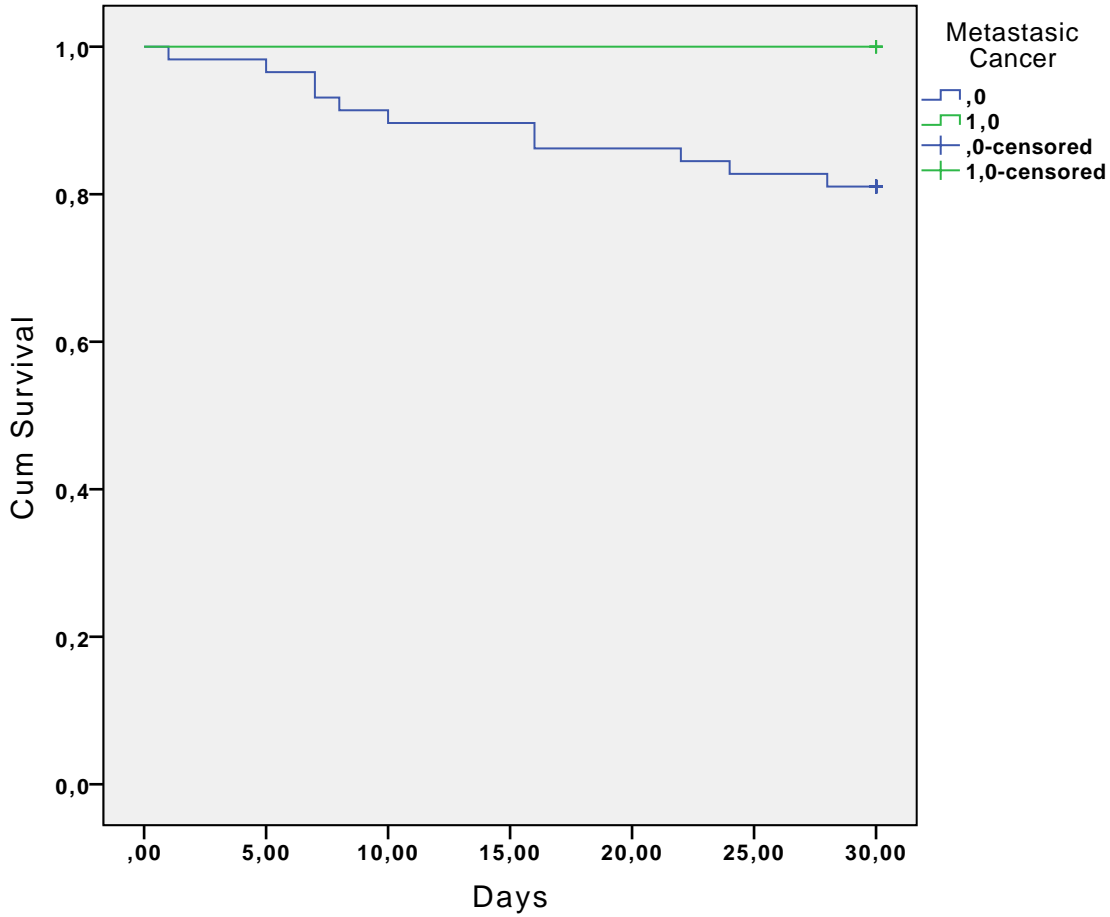

### CONNECTIVE TISSUE DISEASE (0=NO, 1=YES)

#### Case Processing Summary

| Connective Tissue Disease | Total N | N of Events | Censored |         |
|---------------------------|---------|-------------|----------|---------|
|                           |         |             | N        | Percent |
| ,0                        | 60      | 10          | 50       | 83,3%   |
| 1,0                       | 2       | 1           | 1        | 50,0%   |
| Overall                   | 62      | 11          | 51       | 82,3%   |

Survival Table

| Conective Tissue Disease | Time | Status | Cumulative Proportion Surviving at the Time |            | N of Cumulative Events | N of Remaining Cases |
|--------------------------|------|--------|---------------------------------------------|------------|------------------------|----------------------|
|                          |      |        | Estimate                                    | Std. Error |                        |                      |
| ,0                       | 1    | 1,00   | ,983                                        | ,017       | 1                      | 59                   |
|                          | 2    | 1,00   | ,967                                        | ,023       | 2                      | 58                   |
|                          | 3    | 1,00   | ,950                                        | ,028       | 3                      | 57                   |
|                          | 4    | 1,00   | ,933                                        | ,032       | 4                      | 56                   |
|                          | 5    | 1,00   | ,917                                        | ,036       | 5                      | 55                   |
|                          | 6    | 1,00   | .                                           | .          | 6                      | 54                   |
|                          | 7    | 1,00   | ,883                                        | ,041       | 7                      | 53                   |
|                          | 8    | 1,00   | ,867                                        | ,044       | 8                      | 52                   |
|                          | 9    | 1,00   | ,850                                        | ,046       | 9                      | 51                   |
|                          | 10   | 1,00   | ,833                                        | ,048       | 10                     | 50                   |
|                          | 11   | ,00    | .                                           | .          | 10                     | 49                   |
|                          | 12   | ,00    | .                                           | .          | 10                     | 48                   |
|                          | 13   | ,00    | .                                           | .          | 10                     | 47                   |
|                          | 14   | ,00    | .                                           | .          | 10                     | 46                   |
|                          | 15   | ,00    | .                                           | .          | 10                     | 45                   |
|                          | 16   | ,00    | .                                           | .          | 10                     | 44                   |
|                          | 17   | ,00    | .                                           | .          | 10                     | 43                   |
|                          | 18   | ,00    | .                                           | .          | 10                     | 42                   |
|                          | 19   | ,00    | .                                           | .          | 10                     | 41                   |
|                          | 20   | ,00    | .                                           | .          | 10                     | 40                   |
|                          | 21   | ,00    | .                                           | .          | 10                     | 39                   |
|                          | 22   | ,00    | .                                           | .          | 10                     | 38                   |
|                          | 23   | ,00    | .                                           | .          | 10                     | 37                   |
|                          | 24   | ,00    | .                                           | .          | 10                     | 36                   |
|                          | 25   | ,00    | .                                           | .          | 10                     | 35                   |
|                          | 26   | ,00    | .                                           | .          | 10                     | 34                   |
|                          | 27   | ,00    | .                                           | .          | 10                     | 33                   |
|                          | 28   | ,00    | .                                           | .          | 10                     | 32                   |
|                          | 29   | ,00    | .                                           | .          | 10                     | 31                   |
|                          | 30   | ,00    | .                                           | .          | 10                     | 30                   |
|                          | 31   | ,00    | .                                           | .          | 10                     | 29                   |
|                          | 32   | ,00    | .                                           | .          | 10                     | 28                   |
|                          | 33   | ,00    | .                                           | .          | 10                     | 27                   |
|                          | 34   | ,00    | .                                           | .          | 10                     | 26                   |
|                          | 35   | ,00    | .                                           | .          | 10                     | 25                   |
|                          | 36   | ,00    | .                                           | .          | 10                     | 24                   |
|                          | 37   | ,00    | .                                           | .          | 10                     | 23                   |
|                          | 38   | ,00    | .                                           | .          | 10                     | 22                   |
|                          | 39   | ,00    | .                                           | .          | 10                     | 21                   |
|                          | 40   | ,00    | .                                           | .          | 10                     | 20                   |
|                          | 41   | ,00    | .                                           | .          | 10                     | 19                   |
|                          | 42   | ,00    | .                                           | .          | 10                     | 18                   |
|                          | 43   | ,00    | .                                           | .          | 10                     | 17                   |
|                          | 44   | ,00    | .                                           | .          | 10                     | 16                   |
|                          | 45   | ,00    | .                                           | .          | 10                     | 15                   |
|                          | 46   | ,00    | .                                           | .          | 10                     | 14                   |
|                          | 47   | ,00    | .                                           | .          | 10                     | 13                   |
|                          | 48   | ,00    | .                                           | .          | 10                     | 12                   |
|                          | 49   | ,00    | .                                           | .          | 10                     | 11                   |

**Survival Table**

| Conective Tissue Disease | Time   | Status | Cumulative Proportion Surviving at the Time |            | N of Cumulative Events | N of Remaining Cases |   |
|--------------------------|--------|--------|---------------------------------------------|------------|------------------------|----------------------|---|
|                          |        |        | Estimate                                    | Std. Error |                        |                      |   |
| 50                       | 30,000 | ,00    | .                                           | .          | 10                     | 10                   |   |
| 51                       | 30,000 | ,00    | .                                           | .          | 10                     | 9                    |   |
| 52                       | 30,000 | ,00    | .                                           | .          | 10                     | 8                    |   |
| 53                       | 30,000 | ,00    | .                                           | .          | 10                     | 7                    |   |
| 54                       | 30,000 | ,00    | .                                           | .          | 10                     | 6                    |   |
| 55                       | 30,000 | ,00    | .                                           | .          | 10                     | 5                    |   |
| 56                       | 30,000 | ,00    | .                                           | .          | 10                     | 4                    |   |
| 57                       | 30,000 | ,00    | .                                           | .          | 10                     | 3                    |   |
| 58                       | 30,000 | ,00    | .                                           | .          | 10                     | 2                    |   |
| 59                       | 30,000 | ,00    | .                                           | .          | 10                     | 1                    |   |
| 60                       | 30,000 | ,00    | .                                           | .          | 10                     | 0                    |   |
| 1,0                      | 1      | 7,000  | 1,00                                        | ,500       | ,354                   | 1                    | 1 |
|                          | 2      | 30,000 | ,00                                         | .          | .                      | 1                    | 0 |

**Means and Medians for Survival Time**

| Conective Tissue Disease | Mean <sup>a</sup> |            |                         |             | Median   |            |             |
|--------------------------|-------------------|------------|-------------------------|-------------|----------|------------|-------------|
|                          | Estimate          | Std. Error | 95% Confidence Interval |             | Estimate | Std. Error | 95% ...     |
|                          |                   |            | Lower Bound             | Upper Bound |          |            | Lower Bound |
| ,0                       | 27,283            | ,902       | 25,514                  | 29,052      | .        | .          | .           |
| 1,0                      | 18,500            | 8,132      | 2,562                   | 34,438      | 7,000    | .          | .           |
| Overall                  | 27,000            | ,933       | 25,171                  | 28,829      | .        | .          | .           |

**Means and Medians for Survival Time**

| Conective Tissue Disease | Median      |
|--------------------------|-------------|
|                          | 95% ...     |
|                          | Upper Bound |
| ,0                       | .           |
| 1,0                      | .           |
| Overall                  | .           |

a. Estimation is limited to the largest survival time if it is censored.

**Overall Comparisons**

|                       | Chi-Square | df | Sig. |
|-----------------------|------------|----|------|
| Log Rank (Mantel-Cox) | 2,193      | 1  | ,139 |

Test of equality of survival distributions for the different levels of Conective Tissue Disease

### Survival Functions

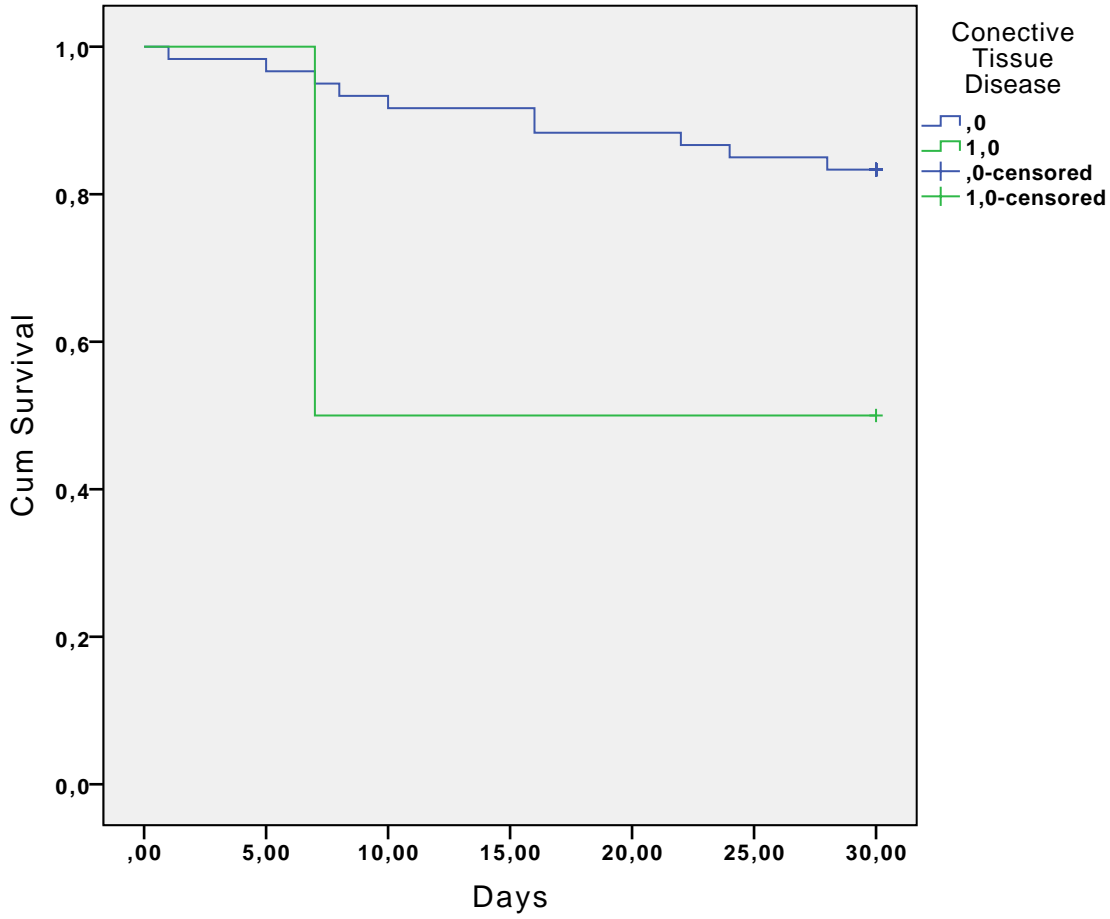

### ADVANCED CHRONIC LIVER DISEASE (0=NO, 1=YES)

#### Case Processing Summary

| Advanced Chronic Liver Disease | Total N | N of Events | Censored |         |
|--------------------------------|---------|-------------|----------|---------|
|                                |         |             | N        | Percent |
| ,0                             | 59      | 9           | 50       | 84,7%   |
| 1,0                            | 2       | 2           | 0        | 0,0%    |
| Overall                        | 61      | 11          | 50       | 82,0%   |

Survival Table

| Advanced Chronic Liver Disease | Time | Status | Cumulative Proportion Surviving at the Time |            | N of Cumulative Events | N of Remaining Cases |
|--------------------------------|------|--------|---------------------------------------------|------------|------------------------|----------------------|
|                                |      |        | Estimate                                    | Std. Error |                        |                      |
| ,0                             | 1    | 1,00   | ,983                                        | ,017       | 1                      | 58                   |
|                                | 2    | 1,00   | ,966                                        | ,024       | 2                      | 57                   |
|                                | 3    | 1,00   | ,949                                        | ,029       | 3                      | 56                   |
|                                | 4    | 1,00   | ,932                                        | ,033       | 4                      | 55                   |
|                                | 5    | 1,00   | .                                           | .          | 5                      | 54                   |
|                                | 6    | 1,00   | ,898                                        | ,039       | 6                      | 53                   |
|                                | 7    | 1,00   | ,881                                        | ,042       | 7                      | 52                   |
|                                | 8    | 1,00   | ,864                                        | ,045       | 8                      | 51                   |
|                                | 9    | 1,00   | ,847                                        | ,047       | 9                      | 50                   |
|                                | 10   | ,00    | .                                           | .          | 9                      | 49                   |
|                                | 11   | ,00    | .                                           | .          | 9                      | 48                   |
|                                | 12   | ,00    | .                                           | .          | 9                      | 47                   |
|                                | 13   | ,00    | .                                           | .          | 9                      | 46                   |
|                                | 14   | ,00    | .                                           | .          | 9                      | 45                   |
|                                | 15   | ,00    | .                                           | .          | 9                      | 44                   |
|                                | 16   | ,00    | .                                           | .          | 9                      | 43                   |
|                                | 17   | ,00    | .                                           | .          | 9                      | 42                   |
|                                | 18   | ,00    | .                                           | .          | 9                      | 41                   |
|                                | 19   | ,00    | .                                           | .          | 9                      | 40                   |
|                                | 20   | ,00    | .                                           | .          | 9                      | 39                   |
|                                | 21   | ,00    | .                                           | .          | 9                      | 38                   |
|                                | 22   | ,00    | .                                           | .          | 9                      | 37                   |
|                                | 23   | ,00    | .                                           | .          | 9                      | 36                   |
|                                | 24   | ,00    | .                                           | .          | 9                      | 35                   |
|                                | 25   | ,00    | .                                           | .          | 9                      | 34                   |
|                                | 26   | ,00    | .                                           | .          | 9                      | 33                   |
|                                | 27   | ,00    | .                                           | .          | 9                      | 32                   |
|                                | 28   | ,00    | .                                           | .          | 9                      | 31                   |
|                                | 29   | ,00    | .                                           | .          | 9                      | 30                   |
|                                | 30   | ,00    | .                                           | .          | 9                      | 29                   |
|                                | 31   | ,00    | .                                           | .          | 9                      | 28                   |
|                                | 32   | ,00    | .                                           | .          | 9                      | 27                   |
|                                | 33   | ,00    | .                                           | .          | 9                      | 26                   |
|                                | 34   | ,00    | .                                           | .          | 9                      | 25                   |
|                                | 35   | ,00    | .                                           | .          | 9                      | 24                   |
|                                | 36   | ,00    | .                                           | .          | 9                      | 23                   |
|                                | 37   | ,00    | .                                           | .          | 9                      | 22                   |
|                                | 38   | ,00    | .                                           | .          | 9                      | 21                   |
|                                | 39   | ,00    | .                                           | .          | 9                      | 20                   |
|                                | 40   | ,00    | .                                           | .          | 9                      | 19                   |
|                                | 41   | ,00    | .                                           | .          | 9                      | 18                   |
|                                | 42   | ,00    | .                                           | .          | 9                      | 17                   |
|                                | 43   | ,00    | .                                           | .          | 9                      | 16                   |
|                                | 44   | ,00    | .                                           | .          | 9                      | 15                   |
|                                | 45   | ,00    | .                                           | .          | 9                      | 14                   |
|                                | 46   | ,00    | .                                           | .          | 9                      | 13                   |
|                                | 47   | ,00    | .                                           | .          | 9                      | 12                   |
|                                | 48   | ,00    | .                                           | .          | 9                      | 11                   |
|                                | 49   | ,00    | .                                           | .          | 9                      | 10                   |

**Survival Table**

| Advanced Chronic Liver Disease | Time   | Status | Cumulative Proportion Surviving at the Time |            | N of Cumulative Events | N of Remaining Cases |   |
|--------------------------------|--------|--------|---------------------------------------------|------------|------------------------|----------------------|---|
|                                |        |        | Estimate                                    | Std. Error |                        |                      |   |
| 50                             | 30,000 | ,00    | .                                           | .          | 9                      | 9                    |   |
| 51                             | 30,000 | ,00    | .                                           | .          | 9                      | 8                    |   |
| 52                             | 30,000 | ,00    | .                                           | .          | 9                      | 7                    |   |
| 53                             | 30,000 | ,00    | .                                           | .          | 9                      | 6                    |   |
| 54                             | 30,000 | ,00    | .                                           | .          | 9                      | 5                    |   |
| 55                             | 30,000 | ,00    | .                                           | .          | 9                      | 4                    |   |
| 56                             | 30,000 | ,00    | .                                           | .          | 9                      | 3                    |   |
| 57                             | 30,000 | ,00    | .                                           | .          | 9                      | 2                    |   |
| 58                             | 30,000 | ,00    | .                                           | .          | 9                      | 1                    |   |
| 59                             | 30,000 | ,00    | .                                           | .          | 9                      | 0                    |   |
| 1,0                            | 1      | 7,000  | 1,00                                        | ,500       | ,354                   | 1                    | 1 |
|                                | 2      | 10,000 | 1,00                                        | ,000       | ,000                   | 2                    | 0 |

**Means and Medians for Survival Time**

| Advanced Chronic Liver Disease | Mean <sup>a</sup> |            |                         |             | Median   |            |             |
|--------------------------------|-------------------|------------|-------------------------|-------------|----------|------------|-------------|
|                                | Estimate          | Std. Error | 95% Confidence Interval |             | Estimate | Std. Error | 95% ...     |
|                                |                   |            | Lower Bound             | Upper Bound |          |            | Lower Bound |
| ,0                             | 27,576            | ,869       | 25,873                  | 29,279      | .        | .          | .           |
| 1,0                            | 8,500             | 1,500      | 5,560                   | 11,440      | 7,000    | .          | .           |
| Overall                        | 26,951            | ,947       | 25,095                  | 28,807      | .        | .          | .           |

**Means and Medians for Survival Time**

| Advanced Chronic Liver Disease | Median      |
|--------------------------------|-------------|
|                                | 95% ...     |
|                                | Upper Bound |
| ,0                             | .           |
| 1,0                            | .           |
| Overall                        | .           |

a. Estimation is limited to the largest survival time if it is censored.

**Overall Comparisons**

|                       | Chi-Square | df | Sig. |
|-----------------------|------------|----|------|
| Log Rank (Mantel-Cox) | 20,551     | 1  | ,000 |

Test of equality of survival distributions for the different levels of Advanced Chronic Liver Disease

### Survival Functions

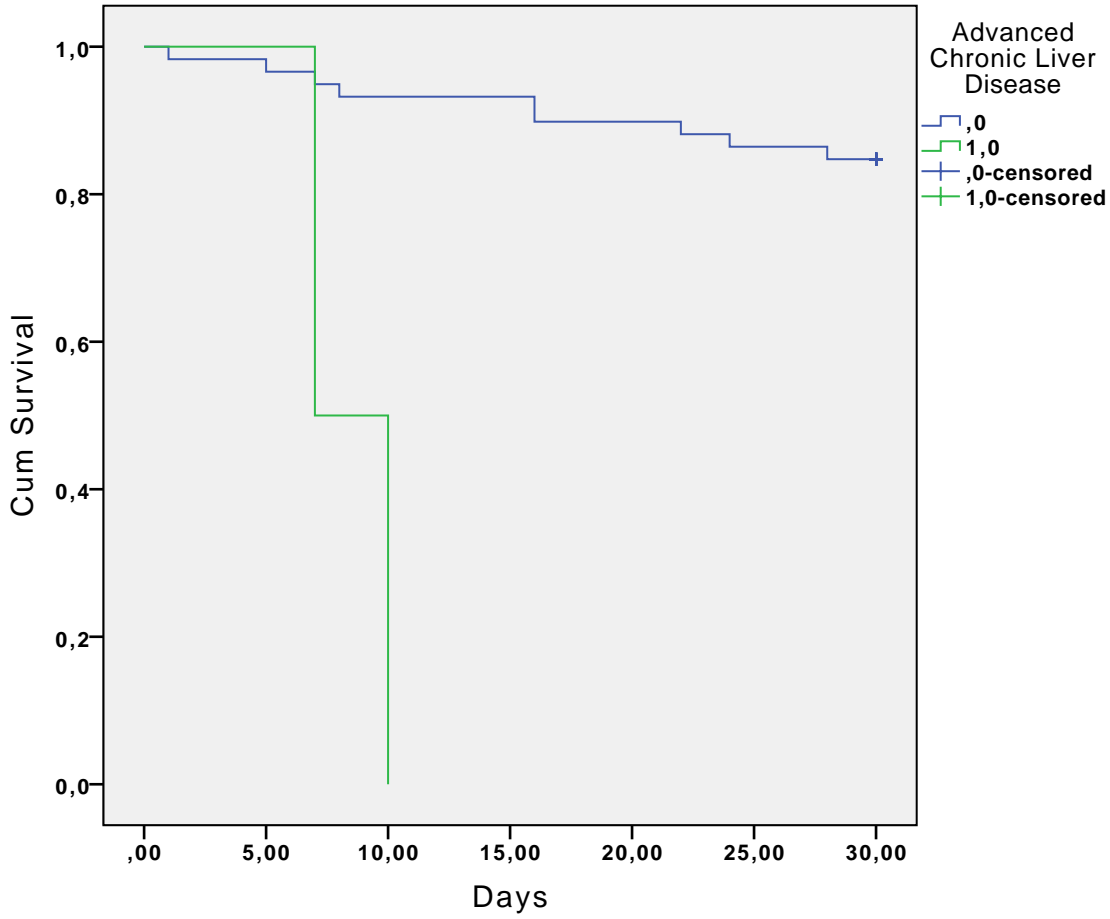

### DIABETES MELLITUS (0=NO, 1=YES)

#### Case Processing Summary

| Diabetes Mellitus | Total N | N of Events | Censored |         |
|-------------------|---------|-------------|----------|---------|
|                   |         |             | N        | Percent |
| ,0                | 43      | 5           | 38       | 88,4%   |
| 1,0               | 19      | 6           | 13       | 68,4%   |
| Overall           | 62      | 11          | 51       | 82,3%   |

Survival Table

| Diabetes Mellitus | Time | Status | Cumulative Proportion Surviving at the Time |            | N of Cumulative Events | N of Remaining Cases |    |
|-------------------|------|--------|---------------------------------------------|------------|------------------------|----------------------|----|
|                   |      |        | Estimate                                    | Std. Error |                        |                      |    |
| ,0                | 1    | 5,000  | 1,00                                        | ,977       | ,023                   | 1                    | 42 |
|                   | 2    | 10,000 | 1,00                                        | ,953       | ,032                   | 2                    | 41 |
|                   | 3    | 16,000 | 1,00                                        | .          | .                      | 3                    | 40 |
|                   | 4    | 16,000 | 1,00                                        | ,907       | ,044                   | 4                    | 39 |
|                   | 5    | 28,000 | 1,00                                        | ,884       | ,049                   | 5                    | 38 |
|                   | 6    | 30,000 | ,00                                         | .          | .                      | 5                    | 37 |
|                   | 7    | 30,000 | ,00                                         | .          | .                      | 5                    | 36 |
|                   | 8    | 30,000 | ,00                                         | .          | .                      | 5                    | 35 |
|                   | 9    | 30,000 | ,00                                         | .          | .                      | 5                    | 34 |
|                   | 10   | 30,000 | ,00                                         | .          | .                      | 5                    | 33 |
|                   | 11   | 30,000 | ,00                                         | .          | .                      | 5                    | 32 |
|                   | 12   | 30,000 | ,00                                         | .          | .                      | 5                    | 31 |
|                   | 13   | 30,000 | ,00                                         | .          | .                      | 5                    | 30 |
|                   | 14   | 30,000 | ,00                                         | .          | .                      | 5                    | 29 |
|                   | 15   | 30,000 | ,00                                         | .          | .                      | 5                    | 28 |
|                   | 16   | 30,000 | ,00                                         | .          | .                      | 5                    | 27 |
|                   | 17   | 30,000 | ,00                                         | .          | .                      | 5                    | 26 |
|                   | 18   | 30,000 | ,00                                         | .          | .                      | 5                    | 25 |
|                   | 19   | 30,000 | ,00                                         | .          | .                      | 5                    | 24 |
|                   | 20   | 30,000 | ,00                                         | .          | .                      | 5                    | 23 |
|                   | 21   | 30,000 | ,00                                         | .          | .                      | 5                    | 22 |
|                   | 22   | 30,000 | ,00                                         | .          | .                      | 5                    | 21 |
|                   | 23   | 30,000 | ,00                                         | .          | .                      | 5                    | 20 |
|                   | 24   | 30,000 | ,00                                         | .          | .                      | 5                    | 19 |
|                   | 25   | 30,000 | ,00                                         | .          | .                      | 5                    | 18 |
|                   | 26   | 30,000 | ,00                                         | .          | .                      | 5                    | 17 |
|                   | 27   | 30,000 | ,00                                         | .          | .                      | 5                    | 16 |
|                   | 28   | 30,000 | ,00                                         | .          | .                      | 5                    | 15 |
|                   | 29   | 30,000 | ,00                                         | .          | .                      | 5                    | 14 |
|                   | 30   | 30,000 | ,00                                         | .          | .                      | 5                    | 13 |
|                   | 31   | 30,000 | ,00                                         | .          | .                      | 5                    | 12 |
|                   | 32   | 30,000 | ,00                                         | .          | .                      | 5                    | 11 |
|                   | 33   | 30,000 | ,00                                         | .          | .                      | 5                    | 10 |
|                   | 34   | 30,000 | ,00                                         | .          | .                      | 5                    | 9  |
|                   | 35   | 30,000 | ,00                                         | .          | .                      | 5                    | 8  |
|                   | 36   | 30,000 | ,00                                         | .          | .                      | 5                    | 7  |
|                   | 37   | 30,000 | ,00                                         | .          | .                      | 5                    | 6  |
|                   | 38   | 30,000 | ,00                                         | .          | .                      | 5                    | 5  |
|                   | 39   | 30,000 | ,00                                         | .          | .                      | 5                    | 4  |
|                   | 40   | 30,000 | ,00                                         | .          | .                      | 5                    | 3  |
|                   | 41   | 30,000 | ,00                                         | .          | .                      | 5                    | 2  |
|                   | 42   | 30,000 | ,00                                         | .          | .                      | 5                    | 1  |
|                   | 43   | 30,000 | ,00                                         | .          | .                      | 5                    | 0  |
| 1,0               | 1    | 1,000  | 1,00                                        | ,947       | ,051                   | 1                    | 18 |
|                   | 2    | 7,000  | 1,00                                        | .          | .                      | 2                    | 17 |
|                   | 3    | 7,000  | 1,00                                        | ,842       | ,084                   | 3                    | 16 |
|                   | 4    | 8,000  | 1,00                                        | ,789       | ,094                   | 4                    | 15 |
|                   | 5    | 22,000 | 1,00                                        | ,737       | ,101                   | 5                    | 14 |
|                   | 6    | 24,000 | 1,00                                        | ,684       | ,107                   | 6                    | 13 |



Survival Table

| Diabetes Mellitus | Time   | Status | Cumulative Proportion Surviving at the Time |            | N of Cumulative Events | N of Remaining Cases |
|-------------------|--------|--------|---------------------------------------------|------------|------------------------|----------------------|
|                   |        |        | Estimate                                    | Std. Error |                        |                      |
| 7                 | 30,000 | ,00    | .                                           | .          | 6                      | 12                   |
| 8                 | 30,000 | ,00    | .                                           | .          | 6                      | 11                   |
| 9                 | 30,000 | ,00    | .                                           | .          | 6                      | 10                   |
| 10                | 30,000 | ,00    | .                                           | .          | 6                      | 9                    |
| 11                | 30,000 | ,00    | .                                           | .          | 6                      | 8                    |
| 12                | 30,000 | ,00    | .                                           | .          | 6                      | 7                    |
| 13                | 30,000 | ,00    | .                                           | .          | 6                      | 6                    |
| 14                | 30,000 | ,00    | .                                           | .          | 6                      | 5                    |
| 15                | 30,000 | ,00    | .                                           | .          | 6                      | 4                    |
| 16                | 30,000 | ,00    | .                                           | .          | 6                      | 3                    |
| 17                | 30,000 | ,00    | .                                           | .          | 6                      | 2                    |
| 18                | 30,000 | ,00    | .                                           | .          | 6                      | 1                    |
| 19                | 30,000 | ,00    | .                                           | .          | 6                      | 0                    |

Means and Medians for Survival Time

| Diabetes Mellitus | Mean <sup>a</sup> |            |                         |             | Median   |            |             |
|-------------------|-------------------|------------|-------------------------|-------------|----------|------------|-------------|
|                   | Estimate          | Std. Error | 95% Confidence Interval |             | Estimate | Std. Error | 95% ...     |
|                   |                   |            | Lower Bound             | Upper Bound |          |            | Lower Bound |
| ,0                | 28,256            | ,835       | 26,619                  | 29,893      | .        | .          | .           |
| 1,0               | 24,158            | 2,254      | 19,740                  | 28,576      | .        | .          | .           |
| Overall           | 27,000            | ,933       | 25,171                  | 28,829      | .        | .          | .           |

Means and Medians for Survival Time

| Diabetes Mellitus | Median      |
|-------------------|-------------|
|                   | 95% ...     |
|                   | Upper Bound |
| ,0                | .           |
| 1,0               | .           |
| Overall           | .           |

a. Estimation is limited to the largest survival time if it is censored.

Overall Comparisons

|                       | Chi-Square | df | Sig. |
|-----------------------|------------|----|------|
| Log Rank (Mantel-Cox) | 3,917      | 1  | ,048 |

Test of equality of survival distributions for the different levels of Diabetes Mellitus

Survival Functions

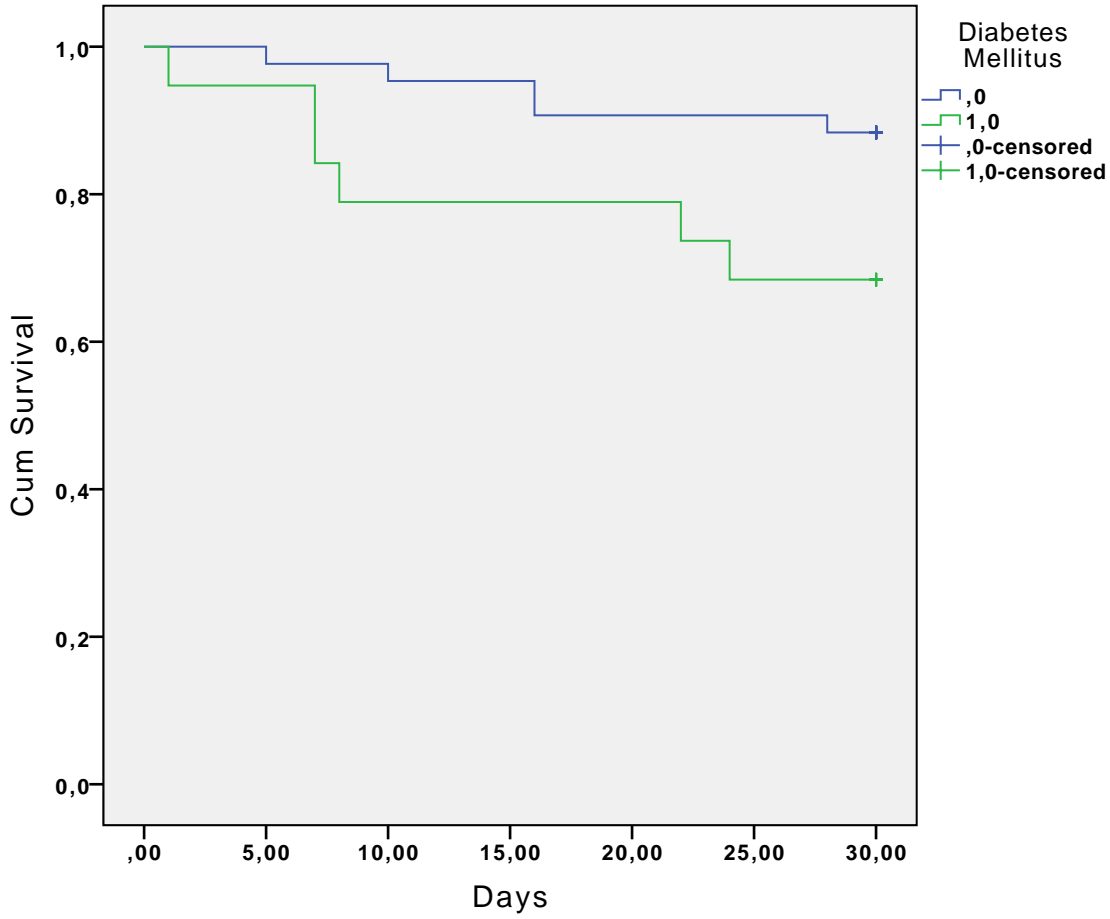

**DIABETES MELLITUS WITH TARGET ORGAN DAMAGE (0=NO, 1=YES)**

Case Processing Summary

| Diabetes Mellitus with Target Organ Damage | Total N | N of Events | Censored |         |
|--------------------------------------------|---------|-------------|----------|---------|
|                                            |         |             | N        | Percent |
| ,0                                         | 55      | 9           | 46       | 83,6%   |
| 1,0                                        | 7       | 2           | 5        | 71,4%   |
| Overall                                    | 62      | 11          | 51       | 82,3%   |

Survival Table

| Diabetes Mellitus with Target Organ Damage | Time | Status | Cumulative Proportion Surviving at the Time |            | N of Cumulative Events |
|--------------------------------------------|------|--------|---------------------------------------------|------------|------------------------|
|                                            |      |        | Estimate                                    | Std. Error |                        |
| ,0                                         | 1    | 1,00   | ,982                                        | ,018       | 1                      |
|                                            | 2    | 1,00   | ,964                                        | ,025       | 2                      |
|                                            | 3    | 1,00   | ,945                                        | ,031       | 3                      |
|                                            | 4    | 1,00   | ,927                                        | ,035       | 4                      |
|                                            | 5    | 1,00   | ,909                                        | ,039       | 5                      |
|                                            | 6    | 1,00   | .                                           | .          | 6                      |
|                                            | 7    | 1,00   | ,873                                        | ,045       | 7                      |
|                                            | 8    | 1,00   | ,855                                        | ,048       | 8                      |
|                                            | 9    | 1,00   | ,836                                        | ,050       | 9                      |
|                                            | 10   | ,00    | .                                           | .          | 9                      |
|                                            | 11   | ,00    | .                                           | .          | 9                      |
|                                            | 12   | ,00    | .                                           | .          | 9                      |
|                                            | 13   | ,00    | .                                           | .          | 9                      |
|                                            | 14   | ,00    | .                                           | .          | 9                      |
|                                            | 15   | ,00    | .                                           | .          | 9                      |
|                                            | 16   | ,00    | .                                           | .          | 9                      |
|                                            | 17   | ,00    | .                                           | .          | 9                      |
|                                            | 18   | ,00    | .                                           | .          | 9                      |
|                                            | 19   | ,00    | .                                           | .          | 9                      |
|                                            | 20   | ,00    | .                                           | .          | 9                      |
|                                            | 21   | ,00    | .                                           | .          | 9                      |
|                                            | 22   | ,00    | .                                           | .          | 9                      |
|                                            | 23   | ,00    | .                                           | .          | 9                      |
|                                            | 24   | ,00    | .                                           | .          | 9                      |
|                                            | 25   | ,00    | .                                           | .          | 9                      |
|                                            | 26   | ,00    | .                                           | .          | 9                      |
|                                            | 27   | ,00    | .                                           | .          | 9                      |
|                                            | 28   | ,00    | .                                           | .          | 9                      |
|                                            | 29   | ,00    | .                                           | .          | 9                      |
|                                            | 30   | ,00    | .                                           | .          | 9                      |
|                                            | 31   | ,00    | .                                           | .          | 9                      |
|                                            | 32   | ,00    | .                                           | .          | 9                      |
|                                            | 33   | ,00    | .                                           | .          | 9                      |
|                                            | 34   | ,00    | .                                           | .          | 9                      |
|                                            | 35   | ,00    | .                                           | .          | 9                      |
|                                            | 36   | ,00    | .                                           | .          | 9                      |
|                                            | 37   | ,00    | .                                           | .          | 9                      |
|                                            | 38   | ,00    | .                                           | .          | 9                      |
|                                            | 39   | ,00    | .                                           | .          | 9                      |
|                                            | 40   | ,00    | .                                           | .          | 9                      |
|                                            | 41   | ,00    | .                                           | .          | 9                      |
|                                            | 42   | ,00    | .                                           | .          | 9                      |
|                                            | 43   | ,00    | .                                           | .          | 9                      |
|                                            | 44   | ,00    | .                                           | .          | 9                      |
|                                            | 45   | ,00    | .                                           | .          | 9                      |
|                                            | 46   | ,00    | .                                           | .          | 9                      |
|                                            | 47   | ,00    | .                                           | .          | 9                      |
|                                            | 48   | ,00    | .                                           | .          | 9                      |
|                                            | 49   | ,00    | .                                           | .          | 9                      |

## Survival Table

| Diabetes Mellitus with Target Organ Damage | N of Remaining Cases |
|--------------------------------------------|----------------------|
| ,0                                         | 54                   |
| 1                                          | 53                   |
| 2                                          | 52                   |
| 3                                          | 51                   |
| 4                                          | 50                   |
| 5                                          | 49                   |
| 6                                          | 48                   |
| 7                                          | 47                   |
| 8                                          | 46                   |
| 9                                          | 45                   |
| 10                                         | 44                   |
| 11                                         | 43                   |
| 12                                         | 42                   |
| 13                                         | 41                   |
| 14                                         | 40                   |
| 15                                         | 39                   |
| 16                                         | 38                   |
| 17                                         | 37                   |
| 18                                         | 36                   |
| 19                                         | 35                   |
| 20                                         | 34                   |
| 21                                         | 33                   |
| 22                                         | 32                   |
| 23                                         | 31                   |
| 24                                         | 30                   |
| 25                                         | 29                   |
| 26                                         | 28                   |
| 27                                         | 27                   |
| 28                                         | 26                   |
| 29                                         | 25                   |
| 30                                         | 24                   |
| 31                                         | 23                   |
| 32                                         | 22                   |
| 33                                         | 21                   |
| 34                                         | 20                   |
| 35                                         | 19                   |
| 36                                         | 18                   |
| 37                                         | 17                   |
| 38                                         | 16                   |
| 39                                         | 15                   |
| 40                                         | 14                   |
| 41                                         | 13                   |
| 42                                         | 12                   |
| 43                                         | 11                   |
| 44                                         | 10                   |
| 45                                         | 9                    |
| 46                                         | 8                    |
| 47                                         | 7                    |
| 48                                         | 6                    |
| 49                                         | 6                    |

Survival Table

| Diabetes Mellitus with Target Organ Damage | Time | Status | Cumulative Proportion Surviving at the Time |            | N of Cumulative Events |   |
|--------------------------------------------|------|--------|---------------------------------------------|------------|------------------------|---|
|                                            |      |        | Estimate                                    | Std. Error |                        |   |
| 1,0                                        | 50   | 30,000 | ,00                                         | .          | .                      | 9 |
|                                            | 51   | 30,000 | ,00                                         | .          | .                      | 9 |
|                                            | 52   | 30,000 | ,00                                         | .          | .                      | 9 |
|                                            | 53   | 30,000 | ,00                                         | .          | .                      | 9 |
|                                            | 54   | 30,000 | ,00                                         | .          | .                      | 9 |
|                                            | 55   | 30,000 | ,00                                         | .          | .                      | 9 |
|                                            | 1    | 7,000  | 1,00                                        | ,857       | ,132                   | 1 |
|                                            | 2    | 24,000 | 1,00                                        | ,714       | ,171                   | 2 |
|                                            | 3    | 30,000 | ,00                                         | .          | .                      | 2 |
|                                            | 4    | 30,000 | ,00                                         | .          | .                      | 2 |
|                                            | 5    | 30,000 | ,00                                         | .          | .                      | 2 |
|                                            | 6    | 30,000 | ,00                                         | .          | .                      | 2 |
|                                            | 7    | 30,000 | ,00                                         | .          | .                      | 2 |

Survival Table

| Diabetes Mellitus with Target Organ Damage | N of Remaining Cases |   |
|--------------------------------------------|----------------------|---|
| 1,0                                        | 50                   | 5 |
|                                            | 51                   | 4 |
|                                            | 52                   | 3 |
|                                            | 53                   | 2 |
|                                            | 54                   | 1 |
|                                            | 55                   | 0 |
|                                            | 1                    | 6 |
|                                            | 2                    | 5 |
|                                            | 3                    | 4 |
|                                            | 4                    | 3 |
|                                            | 5                    | 2 |
|                                            | 6                    | 1 |
|                                            | 7                    | 0 |

Means and Medians for Survival Time

| Diabetes Mellitus with Target Organ Damage | Mean <sup>a</sup> |            |                         |             | Median   |            |             |
|--------------------------------------------|-------------------|------------|-------------------------|-------------|----------|------------|-------------|
|                                            | Estimate          | Std. Error | 95% Confidence Interval |             | Estimate | Std. Error | 95% ...     |
|                                            |                   |            | Lower Bound             | Upper Bound |          |            | Lower Bound |
| ,0                                         | 27,145            | ,978       | 25,229                  | 29,061      | .        | .          | .           |
| 1,0                                        | 25,857            | 3,013      | 19,951                  | 31,763      | .        | .          | .           |
| Overall                                    | 27,000            | ,933       | 25,171                  | 28,829      | .        | .          | .           |

Means and Medians for Survival Time

| Diabetes Mellitus with Target Organ Damage | Median      |
|--------------------------------------------|-------------|
|                                            | 95% ...     |
|                                            | Upper Bound |
| ,0                                         | .           |
| 1,0                                        | .           |
| Overall                                    | .           |

a. Estimation is limited to the largest survival time if it is censored.

Overall Comparisons

|                       | Chi-Square | df | Sig. |
|-----------------------|------------|----|------|
| Log Rank (Mantel-Cox) | ,594       | 1  | ,441 |

Test of equality of survival distributions for the different levels of Diabetes Mellitus with Target Organ Damage

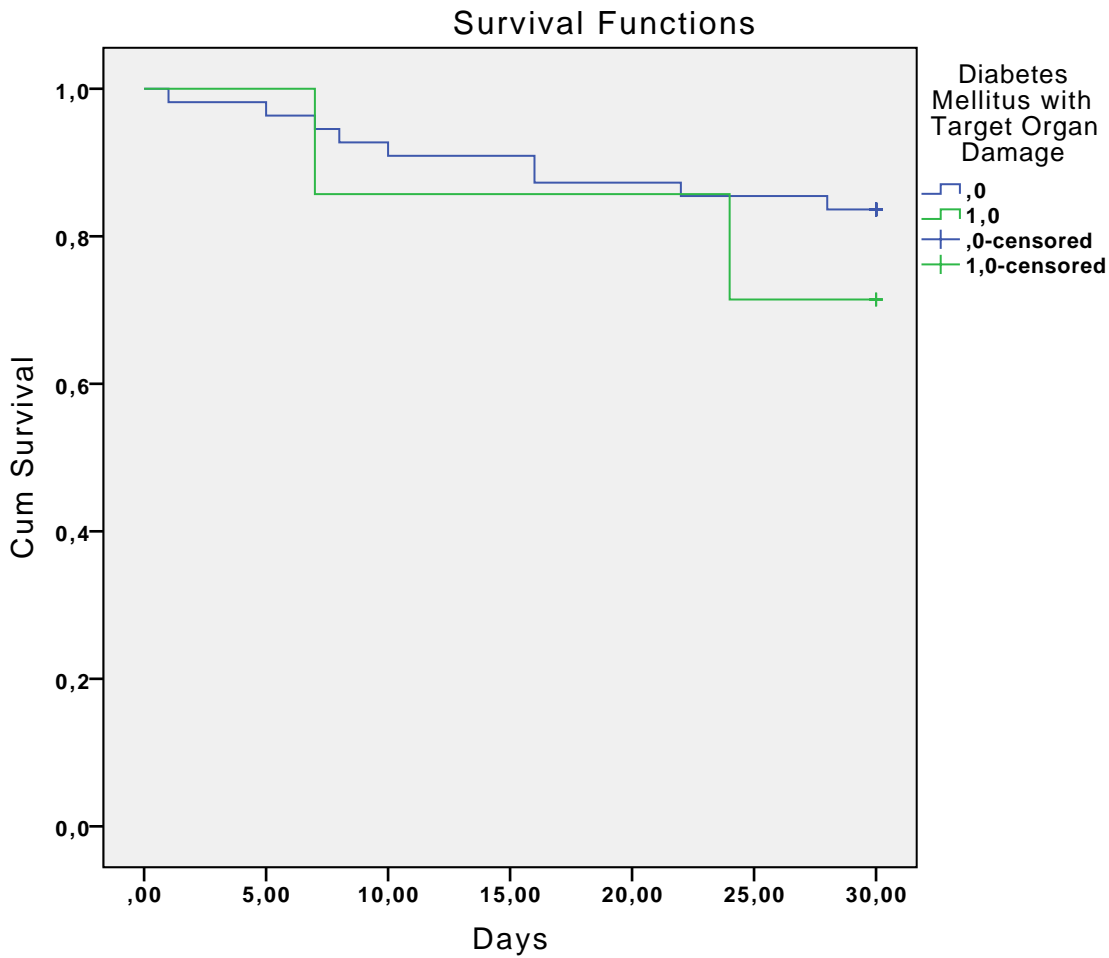

**HYPERTENSION (0=NO, 1=YES)**

Case Processing Summary

| Hypertension | Total N | N of Events | Censored |         |
|--------------|---------|-------------|----------|---------|
|              |         |             | N        | Percent |
| ,0           | 28      | 4           | 24       | 85,7%   |
| 1,0          | 34      | 7           | 27       | 79,4%   |
| Overall      | 62      | 11          | 51       | 82,3%   |

Survival Table

| Hypertension | Time | Status | Cumulative Proportion Surviving at the Time |            | N of Cumulative Events | N of Remaining Cases |
|--------------|------|--------|---------------------------------------------|------------|------------------------|----------------------|
|              |      |        | Estimate                                    | Std. Error |                        |                      |
| ,0           | 1    | 1,00   | ,964                                        | ,035       | 1                      | 27                   |
|              | 2    | 1,00   | ,929                                        | ,049       | 2                      | 26                   |
|              | 3    | 1,00   | ,893                                        | ,058       | 3                      | 25                   |
|              | 4    | 1,00   | ,857                                        | ,066       | 4                      | 24                   |
|              | 5    | ,00    | .                                           | .          | 4                      | 23                   |
|              | 6    | ,00    | .                                           | .          | 4                      | 22                   |
|              | 7    | ,00    | .                                           | .          | 4                      | 21                   |
|              | 8    | ,00    | .                                           | .          | 4                      | 20                   |
|              | 9    | ,00    | .                                           | .          | 4                      | 19                   |
|              | 10   | ,00    | .                                           | .          | 4                      | 18                   |
|              | 11   | ,00    | .                                           | .          | 4                      | 17                   |
|              | 12   | ,00    | .                                           | .          | 4                      | 16                   |
|              | 13   | ,00    | .                                           | .          | 4                      | 15                   |
|              | 14   | ,00    | .                                           | .          | 4                      | 14                   |
|              | 15   | ,00    | .                                           | .          | 4                      | 13                   |
|              | 16   | ,00    | .                                           | .          | 4                      | 12                   |
|              | 17   | ,00    | .                                           | .          | 4                      | 11                   |
|              | 18   | ,00    | .                                           | .          | 4                      | 10                   |
|              | 19   | ,00    | .                                           | .          | 4                      | 9                    |
|              | 20   | ,00    | .                                           | .          | 4                      | 8                    |
|              | 21   | ,00    | .                                           | .          | 4                      | 7                    |
|              | 22   | ,00    | .                                           | .          | 4                      | 6                    |
|              | 23   | ,00    | .                                           | .          | 4                      | 5                    |
|              | 24   | ,00    | .                                           | .          | 4                      | 4                    |
|              | 25   | ,00    | .                                           | .          | 4                      | 3                    |
|              | 26   | ,00    | .                                           | .          | 4                      | 2                    |
|              | 27   | ,00    | .                                           | .          | 4                      | 1                    |
|              | 28   | ,00    | .                                           | .          | 4                      | 0                    |
| 1,0          | 1    | 1,00   | ,971                                        | ,029       | 1                      | 33                   |
|              | 2    | 1,00   | ,941                                        | ,040       | 2                      | 32                   |
|              | 3    | 1,00   | ,912                                        | ,049       | 3                      | 31                   |
|              | 4    | 1,00   | ,882                                        | ,055       | 4                      | 30                   |
|              | 5    | 1,00   | ,853                                        | ,061       | 5                      | 29                   |
|              | 6    | 1,00   | ,824                                        | ,065       | 6                      | 28                   |
|              | 7    | 1,00   | ,794                                        | ,069       | 7                      | 27                   |
|              | 8    | ,00    | .                                           | .          | 7                      | 26                   |
|              | 9    | ,00    | .                                           | .          | 7                      | 25                   |
|              | 10   | ,00    | .                                           | .          | 7                      | 24                   |
|              | 11   | ,00    | .                                           | .          | 7                      | 23                   |
|              | 12   | ,00    | .                                           | .          | 7                      | 22                   |
|              | 13   | ,00    | .                                           | .          | 7                      | 21                   |
|              | 14   | ,00    | .                                           | .          | 7                      | 20                   |
|              | 15   | ,00    | .                                           | .          | 7                      | 19                   |
|              | 16   | ,00    | .                                           | .          | 7                      | 18                   |
|              | 17   | ,00    | .                                           | .          | 7                      | 17                   |
|              | 18   | ,00    | .                                           | .          | 7                      | 16                   |
|              | 19   | ,00    | .                                           | .          | 7                      | 15                   |
|              | 20   | ,00    | .                                           | .          | 7                      | 14                   |
|              | 21   | ,00    | .                                           | .          | 7                      | 13                   |

Survival Table

| Hypertension | Time   | Status | Cumulative Proportion Surviving at the Time |            | N of Cumulative Events | N of Remaining Cases |
|--------------|--------|--------|---------------------------------------------|------------|------------------------|----------------------|
|              |        |        | Estimate                                    | Std. Error |                        |                      |
| 22           | 30,000 | ,00    | .                                           | .          | 7                      | 12                   |
| 23           | 30,000 | ,00    | .                                           | .          | 7                      | 11                   |
| 24           | 30,000 | ,00    | .                                           | .          | 7                      | 10                   |
| 25           | 30,000 | ,00    | .                                           | .          | 7                      | 9                    |
| 26           | 30,000 | ,00    | .                                           | .          | 7                      | 8                    |
| 27           | 30,000 | ,00    | .                                           | .          | 7                      | 7                    |
| 28           | 30,000 | ,00    | .                                           | .          | 7                      | 6                    |
| 29           | 30,000 | ,00    | .                                           | .          | 7                      | 5                    |
| 30           | 30,000 | ,00    | .                                           | .          | 7                      | 4                    |
| 31           | 30,000 | ,00    | .                                           | .          | 7                      | 3                    |
| 32           | 30,000 | ,00    | .                                           | .          | 7                      | 2                    |
| 33           | 30,000 | ,00    | .                                           | .          | 7                      | 1                    |
| 34           | 30,000 | ,00    | .                                           | .          | 7                      | 0                    |

Means and Medians for Survival Time

| Hypertension | Mean <sup>a</sup> |            |                         |             | Median   |            |             |
|--------------|-------------------|------------|-------------------------|-------------|----------|------------|-------------|
|              | Estimate          | Std. Error | 95% Confidence Interval |             | Estimate | Std. Error | 95% ...     |
|              |                   |            | Lower Bound             | Upper Bound |          |            | Lower Bound |
| ,0           | 27,071            | 1,388      | 24,351                  | 29,791      | .        | .          | .           |
| 1,0          | 26,941            | 1,260      | 24,471                  | 29,411      | .        | .          | .           |
| Overall      | 27,000            | ,933       | 25,171                  | 28,829      | .        | .          | .           |

Means and Medians for Survival Time

| Hypertension | Median      |
|--------------|-------------|
|              | 95% ...     |
|              | Upper Bound |
| ,0           | .           |
| 1,0          | .           |
| Overall      | .           |

a. Estimation is limited to the largest survival time if it is censored.

Overall Comparisons

|                       | Chi-Square | df | Sig. |
|-----------------------|------------|----|------|
| Log Rank (Mantel-Cox) | ,345       | 1  | ,557 |

Test of equality of survival distributions for the different levels of Hypertension



### Survival Functions

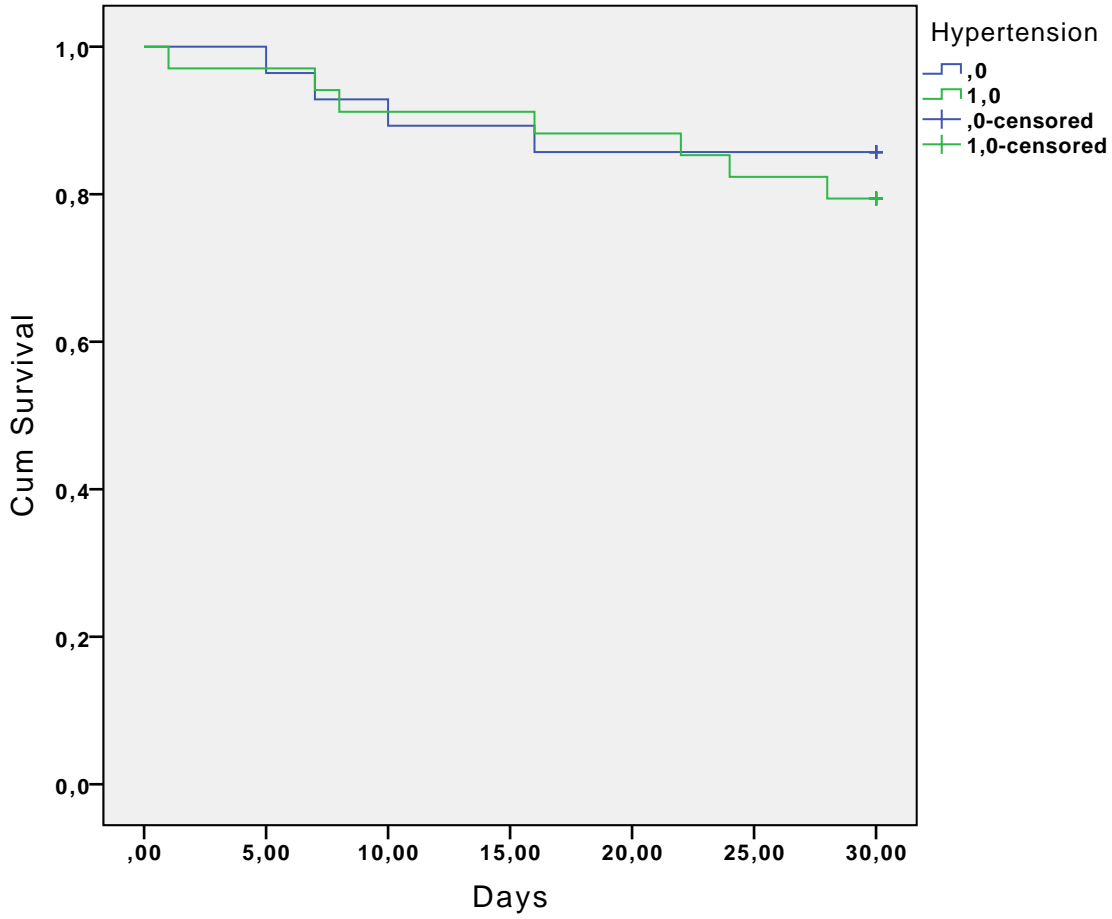

### DYSLIPIDEMIA (0=NO, 1=YES)

#### Case Processing Summary

| Dyslipidemia   | Total N   | N of Events | Censored  |              |
|----------------|-----------|-------------|-----------|--------------|
|                |           |             | N         | Percent      |
| ,0             | 39        | 5           | 34        | 87,2%        |
| 1,0            | 23        | 6           | 17        | 73,9%        |
| <b>Overall</b> | <b>62</b> | <b>11</b>   | <b>51</b> | <b>82,3%</b> |

Survival Table

| Dyslipidemia | Time | Status | Cumulative Proportion Surviving at the Time |            | N of Cumulative Events | N of Remaining Cases |
|--------------|------|--------|---------------------------------------------|------------|------------------------|----------------------|
|              |      |        | Estimate                                    | Std. Error |                        |                      |
| ,0           | 1    | 1,00   | ,974                                        | ,025       | 1                      | 38                   |
|              | 2    | 1,00   | ,949                                        | ,035       | 2                      | 37                   |
|              | 3    | 1,00   | ,923                                        | ,043       | 3                      | 36                   |
|              | 4    | 1,00   | ,897                                        | ,049       | 4                      | 35                   |
|              | 5    | 1,00   | ,872                                        | ,054       | 5                      | 34                   |
|              | 6    | ,00    | .                                           | .          | 5                      | 33                   |
|              | 7    | ,00    | .                                           | .          | 5                      | 32                   |
|              | 8    | ,00    | .                                           | .          | 5                      | 31                   |
|              | 9    | ,00    | .                                           | .          | 5                      | 30                   |
|              | 10   | ,00    | .                                           | .          | 5                      | 29                   |
|              | 11   | ,00    | .                                           | .          | 5                      | 28                   |
|              | 12   | ,00    | .                                           | .          | 5                      | 27                   |
|              | 13   | ,00    | .                                           | .          | 5                      | 26                   |
|              | 14   | ,00    | .                                           | .          | 5                      | 25                   |
|              | 15   | ,00    | .                                           | .          | 5                      | 24                   |
|              | 16   | ,00    | .                                           | .          | 5                      | 23                   |
|              | 17   | ,00    | .                                           | .          | 5                      | 22                   |
|              | 18   | ,00    | .                                           | .          | 5                      | 21                   |
|              | 19   | ,00    | .                                           | .          | 5                      | 20                   |
|              | 20   | ,00    | .                                           | .          | 5                      | 19                   |
|              | 21   | ,00    | .                                           | .          | 5                      | 18                   |
|              | 22   | ,00    | .                                           | .          | 5                      | 17                   |
|              | 23   | ,00    | .                                           | .          | 5                      | 16                   |
|              | 24   | ,00    | .                                           | .          | 5                      | 15                   |
|              | 25   | ,00    | .                                           | .          | 5                      | 14                   |
|              | 26   | ,00    | .                                           | .          | 5                      | 13                   |
|              | 27   | ,00    | .                                           | .          | 5                      | 12                   |
|              | 28   | ,00    | .                                           | .          | 5                      | 11                   |
|              | 29   | ,00    | .                                           | .          | 5                      | 10                   |
|              | 30   | ,00    | .                                           | .          | 5                      | 9                    |
|              | 31   | ,00    | .                                           | .          | 5                      | 8                    |
|              | 32   | ,00    | .                                           | .          | 5                      | 7                    |
|              | 33   | ,00    | .                                           | .          | 5                      | 6                    |
|              | 34   | ,00    | .                                           | .          | 5                      | 5                    |
|              | 35   | ,00    | .                                           | .          | 5                      | 4                    |
|              | 36   | ,00    | .                                           | .          | 5                      | 3                    |
|              | 37   | ,00    | .                                           | .          | 5                      | 2                    |
|              | 38   | ,00    | .                                           | .          | 5                      | 1                    |
|              | 39   | ,00    | .                                           | .          | 5                      | 0                    |
| 1,0          | 1    | 1,00   | ,957                                        | ,043       | 1                      | 22                   |
|              | 2    | 1,00   | ,913                                        | ,059       | 2                      | 21                   |
|              | 3    | 1,00   | ,870                                        | ,070       | 3                      | 20                   |
|              | 4    | 1,00   | .                                           | .          | 4                      | 19                   |
|              | 5    | 1,00   | ,783                                        | ,086       | 5                      | 18                   |
|              | 6    | 1,00   | ,739                                        | ,092       | 6                      | 17                   |
|              | 7    | ,00    | .                                           | .          | 6                      | 16                   |
|              | 8    | ,00    | .                                           | .          | 6                      | 15                   |
|              | 9    | ,00    | .                                           | .          | 6                      | 14                   |
|              | 10   | ,00    | .                                           | .          | 6                      | 13                   |

Survival Table

| Dyslipidemia | Time   | Status | Cumulative Proportion Surviving at the Time |            | N of Cumulative Events | N of Remaining Cases |
|--------------|--------|--------|---------------------------------------------|------------|------------------------|----------------------|
|              |        |        | Estimate                                    | Std. Error |                        |                      |
| 11           | 30,000 | ,00    | .                                           | .          | 6                      | 12                   |
| 12           | 30,000 | ,00    | .                                           | .          | 6                      | 11                   |
| 13           | 30,000 | ,00    | .                                           | .          | 6                      | 10                   |
| 14           | 30,000 | ,00    | .                                           | .          | 6                      | 9                    |
| 15           | 30,000 | ,00    | .                                           | .          | 6                      | 8                    |
| 16           | 30,000 | ,00    | .                                           | .          | 6                      | 7                    |
| 17           | 30,000 | ,00    | .                                           | .          | 6                      | 6                    |
| 18           | 30,000 | ,00    | .                                           | .          | 6                      | 5                    |
| 19           | 30,000 | ,00    | .                                           | .          | 6                      | 4                    |
| 20           | 30,000 | ,00    | .                                           | .          | 6                      | 3                    |
| 21           | 30,000 | ,00    | .                                           | .          | 6                      | 2                    |
| 22           | 30,000 | ,00    | .                                           | .          | 6                      | 1                    |
| 23           | 30,000 | ,00    | .                                           | .          | 6                      | 0                    |

Means and Medians for Survival Time

| Dyslipidemia | Mean <sup>a</sup> |            |                         |             | Median   |            |             |
|--------------|-------------------|------------|-------------------------|-------------|----------|------------|-------------|
|              | Estimate          | Std. Error | 95% Confidence Interval |             | Estimate | Std. Error | 95% ...     |
|              |                   |            | Lower Bound             | Upper Bound |          |            | Lower Bound |
| ,0           | 28,000            | ,982       | 26,076                  | 29,924      | .        | .          | .           |
| 1,0          | 25,304            | 1,832      | 21,714                  | 28,894      | .        | .          | .           |
| Overall      | 27,000            | ,933       | 25,171                  | 28,829      | .        | .          | .           |

Means and Medians for Survival Time

| Dyslipidemia | Median      |
|--------------|-------------|
|              | 95% ...     |
|              | Upper Bound |
| ,0           | .           |
| 1,0          | .           |
| Overall      | .           |

a. Estimation is limited to the largest survival time if it is censored.

Overall Comparisons

|                       | Chi-Square | df | Sig. |
|-----------------------|------------|----|------|
| Log Rank (Mantel-Cox) | 1,780      | 1  | ,182 |

Test of equality of survival distributions for the different levels of Dyslipidemia

### Survival Functions

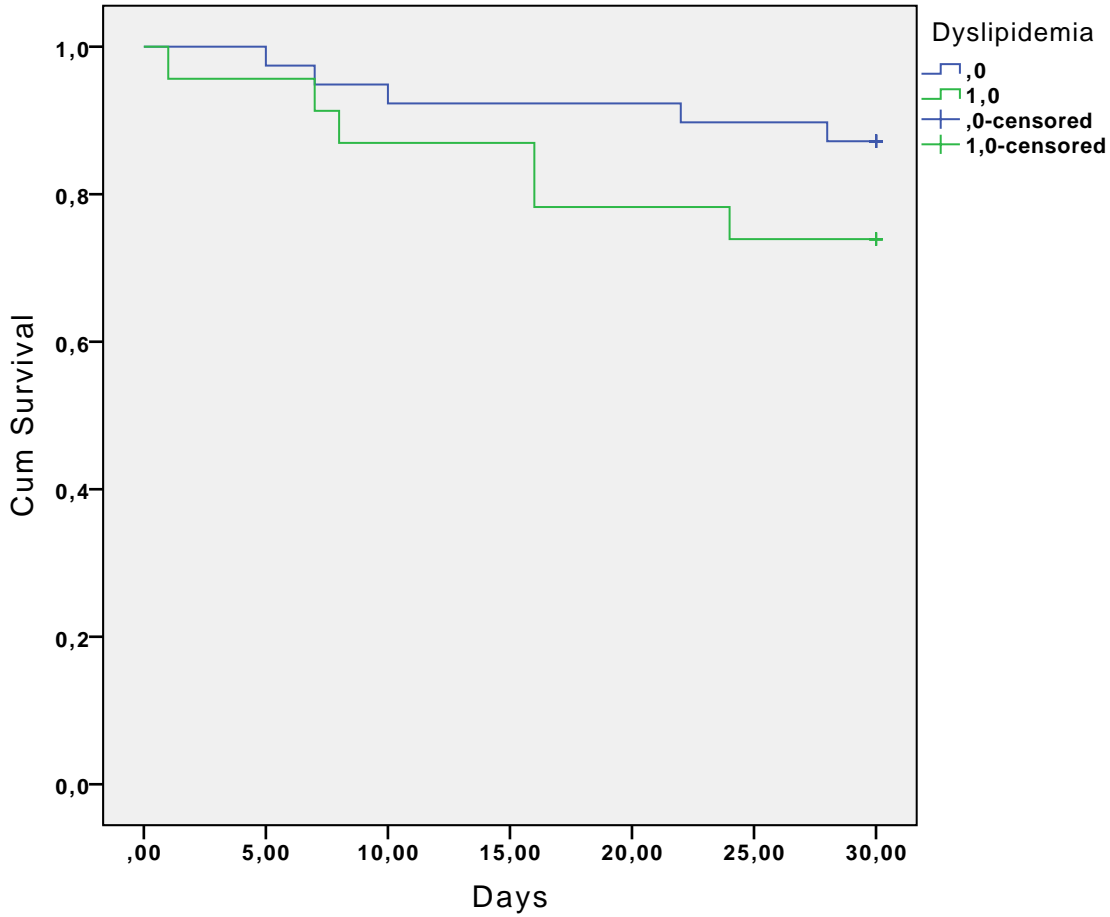

### RESPIRATORY DISEASE (0=NO, 1=YES)

#### Case Processing Summary

| Respiratory Disease | Total N | N of Events | Censored |         |
|---------------------|---------|-------------|----------|---------|
|                     |         |             | N        | Percent |
| ,0                  | 48      | 7           | 41       | 85,4%   |
| 1,0                 | 14      | 4           | 10       | 71,4%   |
| Overall             | 62      | 11          | 51       | 82,3%   |

Survival Table

| Respiratory Disease | Time | Status | Cumulative Proportion Surviving at the Time |            | N of Cumulative Events | N of Remaining Cases |    |
|---------------------|------|--------|---------------------------------------------|------------|------------------------|----------------------|----|
|                     |      |        | Estimate                                    | Std. Error |                        |                      |    |
| ,0                  | 1    | 5,000  | 1,00                                        | ,979       | ,021                   | 1                    | 47 |
|                     | 2    | 7,000  | 1,00                                        | ,958       | ,029                   | 2                    | 46 |
|                     | 3    | 8,000  | 1,00                                        | ,938       | ,035                   | 3                    | 45 |
|                     | 4    | 16,000 | 1,00                                        | .          | .                      | 4                    | 44 |
|                     | 5    | 16,000 | 1,00                                        | ,896       | ,044                   | 5                    | 43 |
|                     | 6    | 22,000 | 1,00                                        | ,875       | ,048                   | 6                    | 42 |
|                     | 7    | 24,000 | 1,00                                        | ,854       | ,051                   | 7                    | 41 |
|                     | 8    | 30,000 | ,00                                         | .          | .                      | 7                    | 40 |
|                     | 9    | 30,000 | ,00                                         | .          | .                      | 7                    | 39 |
|                     | 10   | 30,000 | ,00                                         | .          | .                      | 7                    | 38 |
|                     | 11   | 30,000 | ,00                                         | .          | .                      | 7                    | 37 |
|                     | 12   | 30,000 | ,00                                         | .          | .                      | 7                    | 36 |
|                     | 13   | 30,000 | ,00                                         | .          | .                      | 7                    | 35 |
|                     | 14   | 30,000 | ,00                                         | .          | .                      | 7                    | 34 |
|                     | 15   | 30,000 | ,00                                         | .          | .                      | 7                    | 33 |
|                     | 16   | 30,000 | ,00                                         | .          | .                      | 7                    | 32 |
|                     | 17   | 30,000 | ,00                                         | .          | .                      | 7                    | 31 |
|                     | 18   | 30,000 | ,00                                         | .          | .                      | 7                    | 30 |
|                     | 19   | 30,000 | ,00                                         | .          | .                      | 7                    | 29 |
|                     | 20   | 30,000 | ,00                                         | .          | .                      | 7                    | 28 |
|                     | 21   | 30,000 | ,00                                         | .          | .                      | 7                    | 27 |
|                     | 22   | 30,000 | ,00                                         | .          | .                      | 7                    | 26 |
|                     | 23   | 30,000 | ,00                                         | .          | .                      | 7                    | 25 |
|                     | 24   | 30,000 | ,00                                         | .          | .                      | 7                    | 24 |
|                     | 25   | 30,000 | ,00                                         | .          | .                      | 7                    | 23 |
|                     | 26   | 30,000 | ,00                                         | .          | .                      | 7                    | 22 |
|                     | 27   | 30,000 | ,00                                         | .          | .                      | 7                    | 21 |
|                     | 28   | 30,000 | ,00                                         | .          | .                      | 7                    | 20 |
|                     | 29   | 30,000 | ,00                                         | .          | .                      | 7                    | 19 |
|                     | 30   | 30,000 | ,00                                         | .          | .                      | 7                    | 18 |
|                     | 31   | 30,000 | ,00                                         | .          | .                      | 7                    | 17 |
|                     | 32   | 30,000 | ,00                                         | .          | .                      | 7                    | 16 |
|                     | 33   | 30,000 | ,00                                         | .          | .                      | 7                    | 15 |
|                     | 34   | 30,000 | ,00                                         | .          | .                      | 7                    | 14 |
|                     | 35   | 30,000 | ,00                                         | .          | .                      | 7                    | 13 |
|                     | 36   | 30,000 | ,00                                         | .          | .                      | 7                    | 12 |
|                     | 37   | 30,000 | ,00                                         | .          | .                      | 7                    | 11 |
|                     | 38   | 30,000 | ,00                                         | .          | .                      | 7                    | 10 |
|                     | 39   | 30,000 | ,00                                         | .          | .                      | 7                    | 9  |
|                     | 40   | 30,000 | ,00                                         | .          | .                      | 7                    | 8  |
|                     | 41   | 30,000 | ,00                                         | .          | .                      | 7                    | 7  |
|                     | 42   | 30,000 | ,00                                         | .          | .                      | 7                    | 6  |
|                     | 43   | 30,000 | ,00                                         | .          | .                      | 7                    | 5  |
|                     | 44   | 30,000 | ,00                                         | .          | .                      | 7                    | 4  |
|                     | 45   | 30,000 | ,00                                         | .          | .                      | 7                    | 3  |
|                     | 46   | 30,000 | ,00                                         | .          | .                      | 7                    | 2  |
|                     | 47   | 30,000 | ,00                                         | .          | .                      | 7                    | 1  |
|                     | 48   | 30,000 | ,00                                         | .          | .                      | 7                    | 0  |

Survival Table

| Respiratory Disease | Time | Status | Cumulative Proportion Surviving at the Time |            | N of Cumulative Events | N of Remaining Cases |
|---------------------|------|--------|---------------------------------------------|------------|------------------------|----------------------|
|                     |      |        | Estimate                                    | Std. Error |                        |                      |
| 1,0                 | 1    | 1,00   | ,929                                        | ,069       | 1                      | 13                   |
|                     | 2    | 1,00   | ,857                                        | ,094       | 2                      | 12                   |
|                     | 3    | 1,00   | ,786                                        | ,110       | 3                      | 11                   |
|                     | 4    | 1,00   | ,714                                        | ,121       | 4                      | 10                   |
|                     | 5    | ,00    | .                                           | .          | 4                      | 9                    |
|                     | 6    | ,00    | .                                           | .          | 4                      | 8                    |
|                     | 7    | ,00    | .                                           | .          | 4                      | 7                    |
|                     | 8    | ,00    | .                                           | .          | 4                      | 6                    |
|                     | 9    | ,00    | .                                           | .          | 4                      | 5                    |
|                     | 10   | ,00    | .                                           | .          | 4                      | 4                    |
|                     | 11   | ,00    | .                                           | .          | 4                      | 3                    |
|                     | 12   | ,00    | .                                           | .          | 4                      | 2                    |
|                     | 13   | ,00    | .                                           | .          | 4                      | 1                    |
|                     | 14   | ,00    | .                                           | .          | 4                      | 0                    |

Means and Medians for Survival Time

| Respiratory Disease | Mean <sup>a</sup> |            |                         |             | Median   |            |             |
|---------------------|-------------------|------------|-------------------------|-------------|----------|------------|-------------|
|                     | Estimate          | Std. Error | 95% Confidence Interval |             | Estimate | Std. Error | 95% ...     |
|                     |                   |            | Lower Bound             | Upper Bound |          |            | Lower Bound |
| ,0                  | 27,667            | ,901       | 25,902                  | 29,432      | .        | .          | .           |
| 1,0                 | 24,714            | 2,656      | 19,508                  | 29,920      | .        | .          | .           |
| Overall             | 27,000            | ,933       | 25,171                  | 28,829      | .        | .          | .           |

Means and Medians for Survival Time

| Respiratory Disease | Median      |
|---------------------|-------------|
|                     | 95% ...     |
|                     | Upper Bound |
| ,0                  | .           |
| 1,0                 | .           |
| Overall             | .           |

a. Estimation is limited to the largest survival time if it is censored.

Overall Comparisons

|                       | Chi-Square | df | Sig. |
|-----------------------|------------|----|------|
| Log Rank (Mantel-Cox) | 1,587      | 1  | ,208 |

Test of equality of survival distributions for the different levels of Respiratory Disease.

### Survival Functions

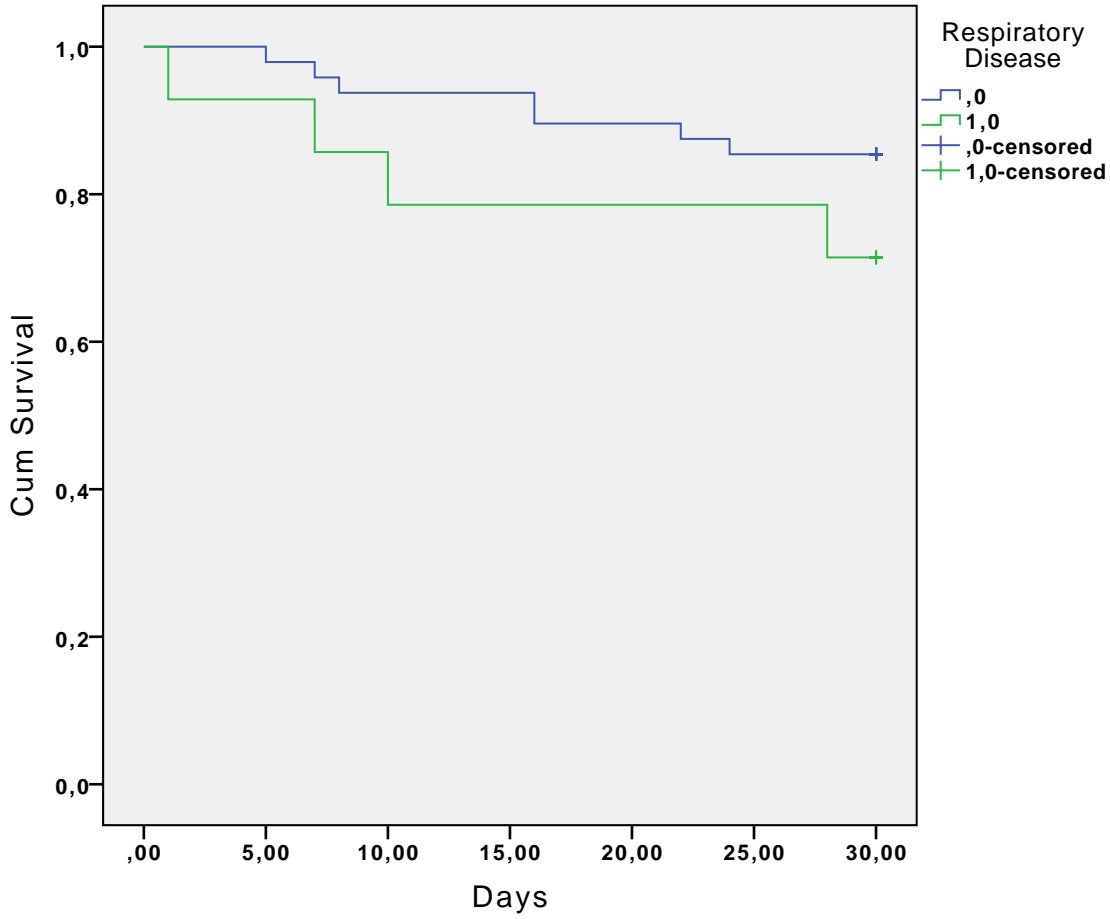

### COPD (0=NO, 1=YES)

Case Processing Summary

| COPD    | Total N | N of Events | Censored |         |
|---------|---------|-------------|----------|---------|
|         |         |             | N        | Percent |
| ,0      | 54      | 9           | 45       | 83,3%   |
| 1,0     | 8       | 2           | 6        | 75,0%   |
| Overall | 62      | 11          | 51       | 82,3%   |

Survival Table

| COPD | Time | Status | Cumulative Proportion Surviving at the Time |            | N of Cumulative Events | N of Remaining Cases |    |
|------|------|--------|---------------------------------------------|------------|------------------------|----------------------|----|
|      |      |        | Estimate                                    | Std. Error |                        |                      |    |
| ,0   | 1    | 5,000  | 1,00                                        | ,981       | ,018                   | 1                    | 53 |
|      | 2    | 7,000  | 1,00                                        | .          | .                      | 2                    | 52 |
|      | 3    | 7,000  | 1,00                                        | ,944       | ,031                   | 3                    | 51 |
|      | 4    | 8,000  | 1,00                                        | ,926       | ,036                   | 4                    | 50 |
|      | 5    | 16,000 | 1,00                                        | .          | .                      | 5                    | 49 |
|      | 6    | 16,000 | 1,00                                        | ,889       | ,043                   | 6                    | 48 |
|      | 7    | 22,000 | 1,00                                        | ,870       | ,046                   | 7                    | 47 |
|      | 8    | 24,000 | 1,00                                        | ,852       | ,048                   | 8                    | 46 |
|      | 9    | 28,000 | 1,00                                        | ,833       | ,051                   | 9                    | 45 |
|      | 10   | 30,000 | ,00                                         | .          | .                      | 9                    | 44 |
|      | 11   | 30,000 | ,00                                         | .          | .                      | 9                    | 43 |
|      | 12   | 30,000 | ,00                                         | .          | .                      | 9                    | 42 |
|      | 13   | 30,000 | ,00                                         | .          | .                      | 9                    | 41 |
|      | 14   | 30,000 | ,00                                         | .          | .                      | 9                    | 40 |
|      | 15   | 30,000 | ,00                                         | .          | .                      | 9                    | 39 |
|      | 16   | 30,000 | ,00                                         | .          | .                      | 9                    | 38 |
|      | 17   | 30,000 | ,00                                         | .          | .                      | 9                    | 37 |
|      | 18   | 30,000 | ,00                                         | .          | .                      | 9                    | 36 |
|      | 19   | 30,000 | ,00                                         | .          | .                      | 9                    | 35 |
|      | 20   | 30,000 | ,00                                         | .          | .                      | 9                    | 34 |
|      | 21   | 30,000 | ,00                                         | .          | .                      | 9                    | 33 |
|      | 22   | 30,000 | ,00                                         | .          | .                      | 9                    | 32 |
|      | 23   | 30,000 | ,00                                         | .          | .                      | 9                    | 31 |
|      | 24   | 30,000 | ,00                                         | .          | .                      | 9                    | 30 |
|      | 25   | 30,000 | ,00                                         | .          | .                      | 9                    | 29 |
|      | 26   | 30,000 | ,00                                         | .          | .                      | 9                    | 28 |
|      | 27   | 30,000 | ,00                                         | .          | .                      | 9                    | 27 |
|      | 28   | 30,000 | ,00                                         | .          | .                      | 9                    | 26 |
|      | 29   | 30,000 | ,00                                         | .          | .                      | 9                    | 25 |
|      | 30   | 30,000 | ,00                                         | .          | .                      | 9                    | 24 |
|      | 31   | 30,000 | ,00                                         | .          | .                      | 9                    | 23 |
|      | 32   | 30,000 | ,00                                         | .          | .                      | 9                    | 22 |
|      | 33   | 30,000 | ,00                                         | .          | .                      | 9                    | 21 |
|      | 34   | 30,000 | ,00                                         | .          | .                      | 9                    | 20 |
|      | 35   | 30,000 | ,00                                         | .          | .                      | 9                    | 19 |
|      | 36   | 30,000 | ,00                                         | .          | .                      | 9                    | 18 |
|      | 37   | 30,000 | ,00                                         | .          | .                      | 9                    | 17 |
|      | 38   | 30,000 | ,00                                         | .          | .                      | 9                    | 16 |
|      | 39   | 30,000 | ,00                                         | .          | .                      | 9                    | 15 |
|      | 40   | 30,000 | ,00                                         | .          | .                      | 9                    | 14 |
|      | 41   | 30,000 | ,00                                         | .          | .                      | 9                    | 13 |
|      | 42   | 30,000 | ,00                                         | .          | .                      | 9                    | 12 |
|      | 43   | 30,000 | ,00                                         | .          | .                      | 9                    | 11 |
|      | 44   | 30,000 | ,00                                         | .          | .                      | 9                    | 10 |
|      | 45   | 30,000 | ,00                                         | .          | .                      | 9                    | 9  |
|      | 46   | 30,000 | ,00                                         | .          | .                      | 9                    | 8  |
|      | 47   | 30,000 | ,00                                         | .          | .                      | 9                    | 7  |
|      | 48   | 30,000 | ,00                                         | .          | .                      | 9                    | 6  |
|      | 49   | 30,000 | ,00                                         | .          | .                      | 9                    | 5  |



Survival Table

| COPD | Time   | Status | Cumulative Proportion Surviving at the Time |            | N of Cumulative Events | N of Remaining Cases |
|------|--------|--------|---------------------------------------------|------------|------------------------|----------------------|
|      |        |        | Estimate                                    | Std. Error |                        |                      |
| 50   | 30,000 | ,00    | .                                           | .          | 9                      | 4                    |
| 51   | 30,000 | ,00    | .                                           | .          | 9                      | 3                    |
| 52   | 30,000 | ,00    | .                                           | .          | 9                      | 2                    |
| 53   | 30,000 | ,00    | .                                           | .          | 9                      | 1                    |
| 54   | 30,000 | ,00    | .                                           | .          | 9                      | 0                    |
| 1,0  | 1,000  | 1,00   | ,875                                        | ,117       | 1                      | 7                    |
| 2    | 10,000 | 1,00   | ,750                                        | ,153       | 2                      | 6                    |
| 3    | 30,000 | ,00    | .                                           | .          | 2                      | 5                    |
| 4    | 30,000 | ,00    | .                                           | .          | 2                      | 4                    |
| 5    | 30,000 | ,00    | .                                           | .          | 2                      | 3                    |
| 6    | 30,000 | ,00    | .                                           | .          | 2                      | 2                    |
| 7    | 30,000 | ,00    | .                                           | .          | 2                      | 1                    |
| 8    | 30,000 | ,00    | .                                           | .          | 2                      | 0                    |

Means and Medians for Survival Time

| COPD    | Mean <sup>a</sup> |            |                         |             | Median   |            |                         |             |
|---------|-------------------|------------|-------------------------|-------------|----------|------------|-------------------------|-------------|
|         | Estimate          | Std. Error | 95% Confidence Interval |             | Estimate | Std. Error | 95% Confidence Interval |             |
|         |                   |            | Lower Bound             | Upper Bound |          |            | Lower Bound             | Upper Bound |
| ,0      | 27,463            | ,891       | 25,716                  | 29,209      | .        | .          | .                       | .           |
| 1,0     | 23,875            | 3,834      | 16,360                  | 31,390      | .        | .          | .                       | .           |
| Overall | 27,000            | ,933       | 25,171                  | 28,829      | .        | .          | .                       | .           |

a. Estimation is limited to the largest survival time if it is censored.

Overall Comparisons

|                       | Chi-Square | df | Sig. |
|-----------------------|------------|----|------|
| Log Rank (Mantel-Cox) | ,470       | 1  | ,493 |

Test of equality of survival distributions for the different levels of COPD

### Survival Functions

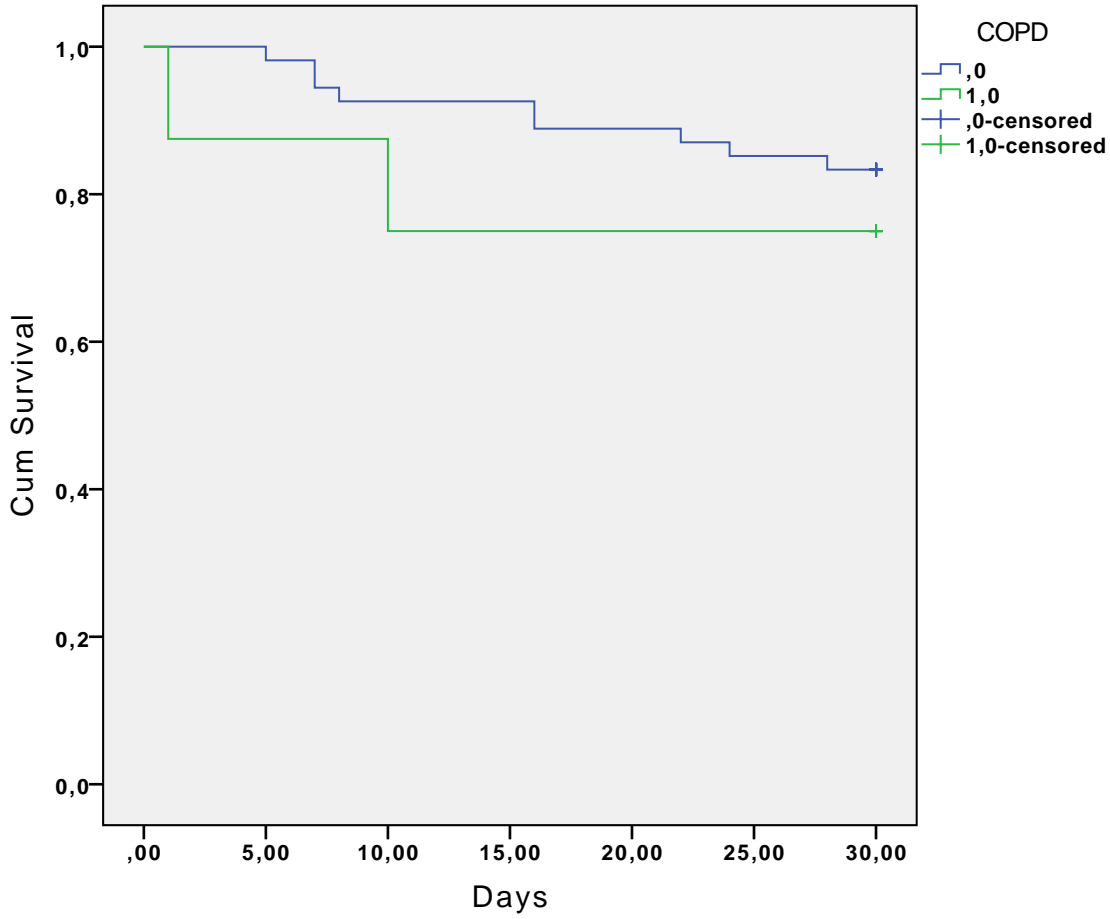

### HEART DISEASE (0=NO, 1=YES)

Case Processing Summary

| Heart Disease | Total N | N of Events | Censored |         |
|---------------|---------|-------------|----------|---------|
|               |         |             | N        | Percent |
| ,0            | 34      | 4           | 30       | 88,2%   |
| 1,0           | 28      | 7           | 21       | 75,0%   |
| Overall       | 62      | 11          | 51       | 82,3%   |

Survival Table

| Heart Disease | Time | Status | Cumulative Proportion Surviving at the Time |            | N of Cumulative Events | N of Remaining Cases |    |
|---------------|------|--------|---------------------------------------------|------------|------------------------|----------------------|----|
|               |      |        | Estimate                                    | Std. Error |                        |                      |    |
| ,0            | 1    | 5,000  | 1,00                                        | ,971       | ,029                   | 1                    | 33 |
|               | 2    | 7,000  | 1,00                                        | ,941       | ,040                   | 2                    | 32 |
|               | 3    | 8,000  | 1,00                                        | ,912       | ,049                   | 3                    | 31 |
|               | 4    | 22,000 | 1,00                                        | ,882       | ,055                   | 4                    | 30 |
|               | 5    | 30,000 | ,00                                         | .          | .                      | 4                    | 29 |
|               | 6    | 30,000 | ,00                                         | .          | .                      | 4                    | 28 |
|               | 7    | 30,000 | ,00                                         | .          | .                      | 4                    | 27 |
|               | 8    | 30,000 | ,00                                         | .          | .                      | 4                    | 26 |
|               | 9    | 30,000 | ,00                                         | .          | .                      | 4                    | 25 |
|               | 10   | 30,000 | ,00                                         | .          | .                      | 4                    | 24 |
|               | 11   | 30,000 | ,00                                         | .          | .                      | 4                    | 23 |
|               | 12   | 30,000 | ,00                                         | .          | .                      | 4                    | 22 |
|               | 13   | 30,000 | ,00                                         | .          | .                      | 4                    | 21 |
|               | 14   | 30,000 | ,00                                         | .          | .                      | 4                    | 20 |
|               | 15   | 30,000 | ,00                                         | .          | .                      | 4                    | 19 |
|               | 16   | 30,000 | ,00                                         | .          | .                      | 4                    | 18 |
|               | 17   | 30,000 | ,00                                         | .          | .                      | 4                    | 17 |
|               | 18   | 30,000 | ,00                                         | .          | .                      | 4                    | 16 |
|               | 19   | 30,000 | ,00                                         | .          | .                      | 4                    | 15 |
|               | 20   | 30,000 | ,00                                         | .          | .                      | 4                    | 14 |
|               | 21   | 30,000 | ,00                                         | .          | .                      | 4                    | 13 |
|               | 22   | 30,000 | ,00                                         | .          | .                      | 4                    | 12 |
|               | 23   | 30,000 | ,00                                         | .          | .                      | 4                    | 11 |
|               | 24   | 30,000 | ,00                                         | .          | .                      | 4                    | 10 |
|               | 25   | 30,000 | ,00                                         | .          | .                      | 4                    | 9  |
|               | 26   | 30,000 | ,00                                         | .          | .                      | 4                    | 8  |
|               | 27   | 30,000 | ,00                                         | .          | .                      | 4                    | 7  |
|               | 28   | 30,000 | ,00                                         | .          | .                      | 4                    | 6  |
|               | 29   | 30,000 | ,00                                         | .          | .                      | 4                    | 5  |
|               | 30   | 30,000 | ,00                                         | .          | .                      | 4                    | 4  |
|               | 31   | 30,000 | ,00                                         | .          | .                      | 4                    | 3  |
|               | 32   | 30,000 | ,00                                         | .          | .                      | 4                    | 2  |
|               | 33   | 30,000 | ,00                                         | .          | .                      | 4                    | 1  |
|               | 34   | 30,000 | ,00                                         | .          | .                      | 4                    | 0  |
| 1,0           | 1    | 1,000  | 1,00                                        | ,964       | ,035                   | 1                    | 27 |
|               | 2    | 7,000  | 1,00                                        | ,929       | ,049                   | 2                    | 26 |
|               | 3    | 10,000 | 1,00                                        | ,893       | ,058                   | 3                    | 25 |
|               | 4    | 16,000 | 1,00                                        | .          | .                      | 4                    | 24 |
|               | 5    | 16,000 | 1,00                                        | ,821       | ,072                   | 5                    | 23 |
|               | 6    | 24,000 | 1,00                                        | ,786       | ,078                   | 6                    | 22 |
|               | 7    | 28,000 | 1,00                                        | ,750       | ,082                   | 7                    | 21 |
|               | 8    | 30,000 | ,00                                         | .          | .                      | 7                    | 20 |
|               | 9    | 30,000 | ,00                                         | .          | .                      | 7                    | 19 |
|               | 10   | 30,000 | ,00                                         | .          | .                      | 7                    | 18 |
|               | 11   | 30,000 | ,00                                         | .          | .                      | 7                    | 17 |
|               | 12   | 30,000 | ,00                                         | .          | .                      | 7                    | 16 |
|               | 13   | 30,000 | ,00                                         | .          | .                      | 7                    | 15 |
|               | 14   | 30,000 | ,00                                         | .          | .                      | 7                    | 14 |
|               | 15   | 30,000 | ,00                                         | .          | .                      | 7                    | 13 |

**Survival Table**

| Heart Disease | Time   | Status | Cumulative Proportion Surviving at the Time |            | N of Cumulative Events | N of Remaining Cases |
|---------------|--------|--------|---------------------------------------------|------------|------------------------|----------------------|
|               |        |        | Estimate                                    | Std. Error |                        |                      |
| 16            | 30,000 | ,00    | .                                           | .          | 7                      | 12                   |
| 17            | 30,000 | ,00    | .                                           | .          | 7                      | 11                   |
| 18            | 30,000 | ,00    | .                                           | .          | 7                      | 10                   |
| 19            | 30,000 | ,00    | .                                           | .          | 7                      | 9                    |
| 20            | 30,000 | ,00    | .                                           | .          | 7                      | 8                    |
| 21            | 30,000 | ,00    | .                                           | .          | 7                      | 7                    |
| 22            | 30,000 | ,00    | .                                           | .          | 7                      | 6                    |
| 23            | 30,000 | ,00    | .                                           | .          | 7                      | 5                    |
| 24            | 30,000 | ,00    | .                                           | .          | 7                      | 4                    |
| 25            | 30,000 | ,00    | .                                           | .          | 7                      | 3                    |
| 26            | 30,000 | ,00    | .                                           | .          | 7                      | 2                    |
| 27            | 30,000 | ,00    | .                                           | .          | 7                      | 1                    |
| 28            | 30,000 | ,00    | .                                           | .          | 7                      | 0                    |

**Means and Medians for Survival Time**

| Heart Disease | Mean <sup>a</sup> |            |                         |             | Median   |            |             |
|---------------|-------------------|------------|-------------------------|-------------|----------|------------|-------------|
|               | Estimate          | Std. Error | 95% Confidence Interval |             | Estimate | Std. Error | 95% ...     |
|               |                   |            | Lower Bound             | Upper Bound |          |            | Lower Bound |
| ,0            | 27,706            | 1,148      | 25,456                  | 29,956      | .        | .          | .           |
| 1,0           | 26,143            | 1,509      | 23,185                  | 29,101      | .        | .          | .           |
| Overall       | 27,000            | ,933       | 25,171                  | 28,829      | .        | .          | .           |

**Means and Medians for Survival Time**

| Heart Disease | Median      |
|---------------|-------------|
|               | 95% ...     |
|               | Upper Bound |
| ,0            | .           |
| 1,0           | .           |
| Overall       | .           |

a. Estimation is limited to the largest survival time if it is censored.

**Overall Comparisons**

|                       | Chi-Square | df | Sig. |
|-----------------------|------------|----|------|
| Log Rank (Mantel-Cox) | 1,676      | 1  | ,195 |

Test of equality of survival distributions for the different levels of Heart Disease

### Survival Functions

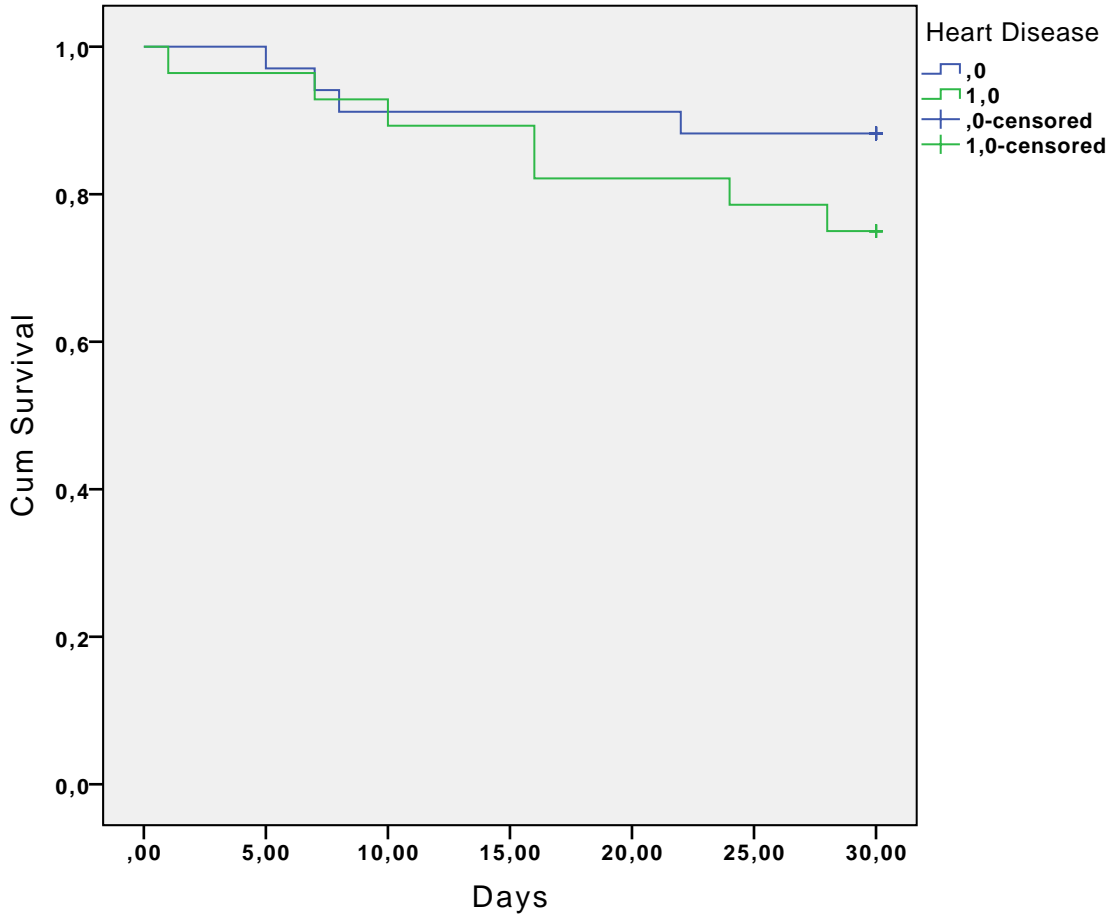

### HEART FAILURE (0=NO, 1=YES)

#### Case Processing Summary

| Heart Failure | Total N | N of Events | Censored |         |
|---------------|---------|-------------|----------|---------|
|               |         |             | N        | Percent |
| ,0            | 47      | 6           | 41       | 87,2%   |
| 1,0           | 15      | 5           | 10       | 66,7%   |
| Overall       | 62      | 11          | 51       | 82,3%   |

Survival Table

| Heart Failure | Time | Status | Cumulative Proportion Surviving at the Time |            | N of Cumulative Events | N of Remaining Cases |    |
|---------------|------|--------|---------------------------------------------|------------|------------------------|----------------------|----|
|               |      |        | Estimate                                    | Std. Error |                        |                      |    |
| ,0            | 1    | 5,000  | 1,00                                        | ,979       | ,021                   | 1                    | 46 |
|               | 2    | 7,000  | 1,00                                        | ,957       | ,029                   | 2                    | 45 |
|               | 3    | 8,000  | 1,00                                        | ,936       | ,036                   | 3                    | 44 |
|               | 4    | 10,000 | 1,00                                        | ,915       | ,041                   | 4                    | 43 |
|               | 5    | 16,000 | 1,00                                        | ,894       | ,045                   | 5                    | 42 |
|               | 6    | 22,000 | 1,00                                        | ,872       | ,049                   | 6                    | 41 |
|               | 7    | 30,000 | ,00                                         | .          | .                      | 6                    | 40 |
|               | 8    | 30,000 | ,00                                         | .          | .                      | 6                    | 39 |
|               | 9    | 30,000 | ,00                                         | .          | .                      | 6                    | 38 |
|               | 10   | 30,000 | ,00                                         | .          | .                      | 6                    | 37 |
|               | 11   | 30,000 | ,00                                         | .          | .                      | 6                    | 36 |
|               | 12   | 30,000 | ,00                                         | .          | .                      | 6                    | 35 |
|               | 13   | 30,000 | ,00                                         | .          | .                      | 6                    | 34 |
|               | 14   | 30,000 | ,00                                         | .          | .                      | 6                    | 33 |
|               | 15   | 30,000 | ,00                                         | .          | .                      | 6                    | 32 |
|               | 16   | 30,000 | ,00                                         | .          | .                      | 6                    | 31 |
|               | 17   | 30,000 | ,00                                         | .          | .                      | 6                    | 30 |
|               | 18   | 30,000 | ,00                                         | .          | .                      | 6                    | 29 |
|               | 19   | 30,000 | ,00                                         | .          | .                      | 6                    | 28 |
|               | 20   | 30,000 | ,00                                         | .          | .                      | 6                    | 27 |
|               | 21   | 30,000 | ,00                                         | .          | .                      | 6                    | 26 |
|               | 22   | 30,000 | ,00                                         | .          | .                      | 6                    | 25 |
|               | 23   | 30,000 | ,00                                         | .          | .                      | 6                    | 24 |
|               | 24   | 30,000 | ,00                                         | .          | .                      | 6                    | 23 |
|               | 25   | 30,000 | ,00                                         | .          | .                      | 6                    | 22 |
|               | 26   | 30,000 | ,00                                         | .          | .                      | 6                    | 21 |
|               | 27   | 30,000 | ,00                                         | .          | .                      | 6                    | 20 |
|               | 28   | 30,000 | ,00                                         | .          | .                      | 6                    | 19 |
|               | 29   | 30,000 | ,00                                         | .          | .                      | 6                    | 18 |
|               | 30   | 30,000 | ,00                                         | .          | .                      | 6                    | 17 |
|               | 31   | 30,000 | ,00                                         | .          | .                      | 6                    | 16 |
|               | 32   | 30,000 | ,00                                         | .          | .                      | 6                    | 15 |
|               | 33   | 30,000 | ,00                                         | .          | .                      | 6                    | 14 |
|               | 34   | 30,000 | ,00                                         | .          | .                      | 6                    | 13 |
|               | 35   | 30,000 | ,00                                         | .          | .                      | 6                    | 12 |
|               | 36   | 30,000 | ,00                                         | .          | .                      | 6                    | 11 |
|               | 37   | 30,000 | ,00                                         | .          | .                      | 6                    | 10 |
|               | 38   | 30,000 | ,00                                         | .          | .                      | 6                    | 9  |
|               | 39   | 30,000 | ,00                                         | .          | .                      | 6                    | 8  |
|               | 40   | 30,000 | ,00                                         | .          | .                      | 6                    | 7  |
|               | 41   | 30,000 | ,00                                         | .          | .                      | 6                    | 6  |
|               | 42   | 30,000 | ,00                                         | .          | .                      | 6                    | 5  |
|               | 43   | 30,000 | ,00                                         | .          | .                      | 6                    | 4  |
|               | 44   | 30,000 | ,00                                         | .          | .                      | 6                    | 3  |
|               | 45   | 30,000 | ,00                                         | .          | .                      | 6                    | 2  |
|               | 46   | 30,000 | ,00                                         | .          | .                      | 6                    | 1  |
|               | 47   | 30,000 | ,00                                         | .          | .                      | 6                    | 0  |
| 1,0           | 1    | 1,000  | 1,00                                        | ,933       | ,064                   | 1                    | 14 |
|               | 2    | 7,000  | 1,00                                        | ,867       | ,088                   | 2                    | 13 |

Survival Table

| Heart Failure | Time   | Status | Cumulative Proportion Surviving at the Time |            | N of Cumulative Events | N of Remaining Cases |
|---------------|--------|--------|---------------------------------------------|------------|------------------------|----------------------|
|               |        |        | Estimate                                    | Std. Error |                        |                      |
| 3             | 16,000 | 1,00   | ,800                                        | ,103       | 3                      | 12                   |
| 4             | 24,000 | 1,00   | ,733                                        | ,114       | 4                      | 11                   |
| 5             | 28,000 | 1,00   | ,667                                        | ,122       | 5                      | 10                   |
| 6             | 30,000 | ,00    | .                                           | .          | 5                      | 9                    |
| 7             | 30,000 | ,00    | .                                           | .          | 5                      | 8                    |
| 8             | 30,000 | ,00    | .                                           | .          | 5                      | 7                    |
| 9             | 30,000 | ,00    | .                                           | .          | 5                      | 6                    |
| 10            | 30,000 | ,00    | .                                           | .          | 5                      | 5                    |
| 11            | 30,000 | ,00    | .                                           | .          | 5                      | 4                    |
| 12            | 30,000 | ,00    | .                                           | .          | 5                      | 3                    |
| 13            | 30,000 | ,00    | .                                           | .          | 5                      | 2                    |
| 14            | 30,000 | ,00    | .                                           | .          | 5                      | 1                    |
| 15            | 30,000 | ,00    | .                                           | .          | 5                      | 0                    |

Means and Medians for Survival Time

| Heart Failure | Mean <sup>a</sup> |            |                         |             | Median   |            |             |
|---------------|-------------------|------------|-------------------------|-------------|----------|------------|-------------|
|               | Estimate          | Std. Error | 95% Confidence Interval |             | Estimate | Std. Error | 95% ...     |
|               |                   |            | Lower Bound             | Upper Bound |          |            | Lower Bound |
| ,0            | 27,617            | ,959       | 25,738                  | 29,496      | .        | .          | .           |
| 1,0           | 25,067            | 2,348      | 20,464                  | 29,670      | .        | .          | .           |
| Overall       | 27,000            | ,933       | 25,171                  | 28,829      | .        | .          | .           |

Means and Medians for Survival Time

| Heart Failure | Median      |
|---------------|-------------|
|               | 95% ...     |
|               | Upper Bound |
| ,0            | .           |
| 1,0           | .           |
| Overall       | .           |

a. Estimation is limited to the largest survival time if it is censored.

Overall Comparisons

|                       | Chi-Square | df | Sig. |
|-----------------------|------------|----|------|
| Log Rank (Mantel-Cox) | 3,206      | 1  | ,073 |

Test of equality of survival distributions for the different levels of Heart Failure

### Survival Functions

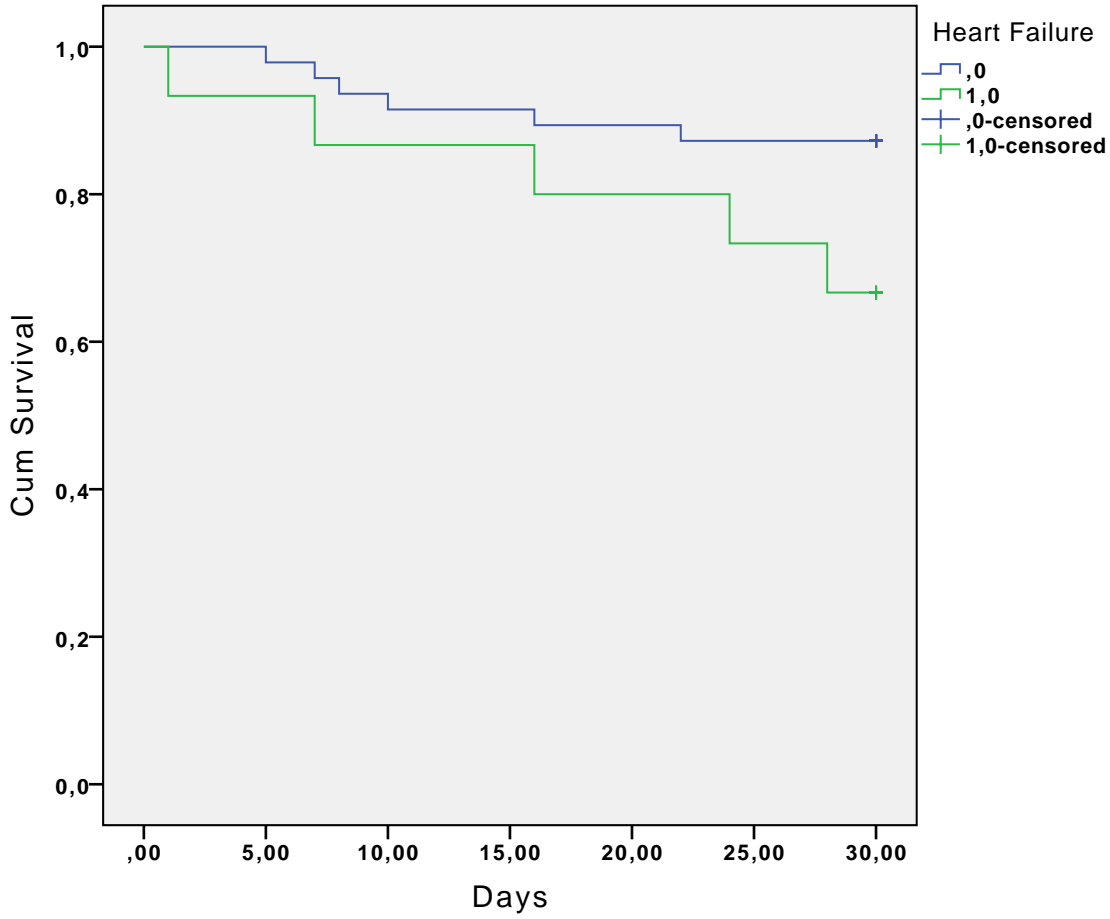

### MYOCARDIAL INFARCTION (0=NO, 1=YES)

Case Processing Summary

| Myocardial Infarction | Total N | N of Events | Censored |         |
|-----------------------|---------|-------------|----------|---------|
|                       |         |             | N        | Percent |
| ,0                    | 52      | 8           | 44       | 84,6%   |
| 1,0                   | 10      | 3           | 7        | 70,0%   |
| Overall               | 62      | 11          | 51       | 82,3%   |



Survival Table

| Myocardial Infarction | Time | Status | Cumulative Proportion Surviving at the Time |            | N of Cumulative Events | N of Remaining Cases |    |
|-----------------------|------|--------|---------------------------------------------|------------|------------------------|----------------------|----|
|                       |      |        | Estimate                                    | Std. Error |                        |                      |    |
| ,0                    | 1    | 5,000  | 1,00                                        | ,981       | ,019                   | 1                    | 51 |
|                       | 2    | 7,000  | 1,00                                        | .          | .                      | 2                    | 50 |
|                       | 3    | 7,000  | 1,00                                        | ,942       | ,032                   | 3                    | 49 |
|                       | 4    | 8,000  | 1,00                                        | ,923       | ,037                   | 4                    | 48 |
|                       | 5    | 10,000 | 1,00                                        | ,904       | ,041                   | 5                    | 47 |
|                       | 6    | 16,000 | 1,00                                        | ,885       | ,044                   | 6                    | 46 |
|                       | 7    | 22,000 | 1,00                                        | ,865       | ,047                   | 7                    | 45 |
|                       | 8    | 28,000 | 1,00                                        | ,846       | ,050                   | 8                    | 44 |
|                       | 9    | 30,000 | ,00                                         | .          | .                      | 8                    | 43 |
|                       | 10   | 30,000 | ,00                                         | .          | .                      | 8                    | 42 |
|                       | 11   | 30,000 | ,00                                         | .          | .                      | 8                    | 41 |
|                       | 12   | 30,000 | ,00                                         | .          | .                      | 8                    | 40 |
|                       | 13   | 30,000 | ,00                                         | .          | .                      | 8                    | 39 |
|                       | 14   | 30,000 | ,00                                         | .          | .                      | 8                    | 38 |
|                       | 15   | 30,000 | ,00                                         | .          | .                      | 8                    | 37 |
|                       | 16   | 30,000 | ,00                                         | .          | .                      | 8                    | 36 |
|                       | 17   | 30,000 | ,00                                         | .          | .                      | 8                    | 35 |
|                       | 18   | 30,000 | ,00                                         | .          | .                      | 8                    | 34 |
|                       | 19   | 30,000 | ,00                                         | .          | .                      | 8                    | 33 |
|                       | 20   | 30,000 | ,00                                         | .          | .                      | 8                    | 32 |
|                       | 21   | 30,000 | ,00                                         | .          | .                      | 8                    | 31 |
|                       | 22   | 30,000 | ,00                                         | .          | .                      | 8                    | 30 |
|                       | 23   | 30,000 | ,00                                         | .          | .                      | 8                    | 29 |
|                       | 24   | 30,000 | ,00                                         | .          | .                      | 8                    | 28 |
|                       | 25   | 30,000 | ,00                                         | .          | .                      | 8                    | 27 |
|                       | 26   | 30,000 | ,00                                         | .          | .                      | 8                    | 26 |
|                       | 27   | 30,000 | ,00                                         | .          | .                      | 8                    | 25 |
|                       | 28   | 30,000 | ,00                                         | .          | .                      | 8                    | 24 |
|                       | 29   | 30,000 | ,00                                         | .          | .                      | 8                    | 23 |
|                       | 30   | 30,000 | ,00                                         | .          | .                      | 8                    | 22 |
|                       | 31   | 30,000 | ,00                                         | .          | .                      | 8                    | 21 |
|                       | 32   | 30,000 | ,00                                         | .          | .                      | 8                    | 20 |
|                       | 33   | 30,000 | ,00                                         | .          | .                      | 8                    | 19 |
|                       | 34   | 30,000 | ,00                                         | .          | .                      | 8                    | 18 |
|                       | 35   | 30,000 | ,00                                         | .          | .                      | 8                    | 17 |
|                       | 36   | 30,000 | ,00                                         | .          | .                      | 8                    | 16 |
|                       | 37   | 30,000 | ,00                                         | .          | .                      | 8                    | 15 |
|                       | 38   | 30,000 | ,00                                         | .          | .                      | 8                    | 14 |
|                       | 39   | 30,000 | ,00                                         | .          | .                      | 8                    | 13 |
|                       | 40   | 30,000 | ,00                                         | .          | .                      | 8                    | 12 |
|                       | 41   | 30,000 | ,00                                         | .          | .                      | 8                    | 11 |
|                       | 42   | 30,000 | ,00                                         | .          | .                      | 8                    | 10 |
|                       | 43   | 30,000 | ,00                                         | .          | .                      | 8                    | 9  |
|                       | 44   | 30,000 | ,00                                         | .          | .                      | 8                    | 8  |
|                       | 45   | 30,000 | ,00                                         | .          | .                      | 8                    | 7  |
|                       | 46   | 30,000 | ,00                                         | .          | .                      | 8                    | 6  |
|                       | 47   | 30,000 | ,00                                         | .          | .                      | 8                    | 5  |
|                       | 48   | 30,000 | ,00                                         | .          | .                      | 8                    | 4  |
|                       | 49   | 30,000 | ,00                                         | .          | .                      | 8                    | 3  |

Survival Table

| Myocardial Infarction | Time   | Status | Cumulative Proportion Surviving at the Time |            | N of Cumulative Events | N of Remaining Cases |
|-----------------------|--------|--------|---------------------------------------------|------------|------------------------|----------------------|
|                       |        |        | Estimate                                    | Std. Error |                        |                      |
| 50                    | 30,000 | ,00    | .                                           | .          | 8                      | 2                    |
| 51                    | 30,000 | ,00    | .                                           | .          | 8                      | 1                    |
| 52                    | 30,000 | ,00    | .                                           | .          | 8                      | 0                    |
| 1,0                   | 1,000  | 1,00   | ,900                                        | ,095       | 1                      | 9                    |
| 2                     | 16,000 | 1,00   | ,800                                        | ,126       | 2                      | 8                    |
| 3                     | 24,000 | 1,00   | ,700                                        | ,145       | 3                      | 7                    |
| 4                     | 30,000 | ,00    | .                                           | .          | 3                      | 6                    |
| 5                     | 30,000 | ,00    | .                                           | .          | 3                      | 5                    |
| 6                     | 30,000 | ,00    | .                                           | .          | 3                      | 4                    |
| 7                     | 30,000 | ,00    | .                                           | .          | 3                      | 3                    |
| 8                     | 30,000 | ,00    | .                                           | .          | 3                      | 2                    |
| 9                     | 30,000 | ,00    | .                                           | .          | 3                      | 1                    |
| 10                    | 30,000 | ,00    | .                                           | .          | 3                      | 0                    |

Means and Medians for Survival Time

| Myocardial Infarction | Mean <sup>a</sup> |            |                         |             | Median   |            |             |
|-----------------------|-------------------|------------|-------------------------|-------------|----------|------------|-------------|
|                       | Estimate          | Std. Error | 95% Confidence Interval |             | Estimate | Std. Error | 95% ...     |
|                       |                   |            | Lower Bound             | Upper Bound |          |            | Lower Bound |
| ,0                    | 27,365            | ,956       | 25,492                  | 29,239      | .        | .          | .           |
| 1,0                   | 25,100            | 2,886      | 19,443                  | 30,757      | .        | .          | .           |
| Overall               | 27,000            | ,933       | 25,171                  | 28,829      | .        | .          | .           |

Means and Medians for Survival Time

| Myocardial Infarction | Median      |
|-----------------------|-------------|
|                       | 95% ...     |
|                       | Upper Bound |
| ,0                    | .           |
| 1,0                   | .           |
| Overall               | .           |

a. Estimation is limited to the largest survival time if it is censored.

Overall Comparisons

|                       | Chi-Square | df | Sig. |
|-----------------------|------------|----|------|
| Log Rank (Mantel-Cox) | 1,240      | 1  | ,265 |

Test of equality of survival distributions for the different levels of Myocardial Infarction

### Survival Functions

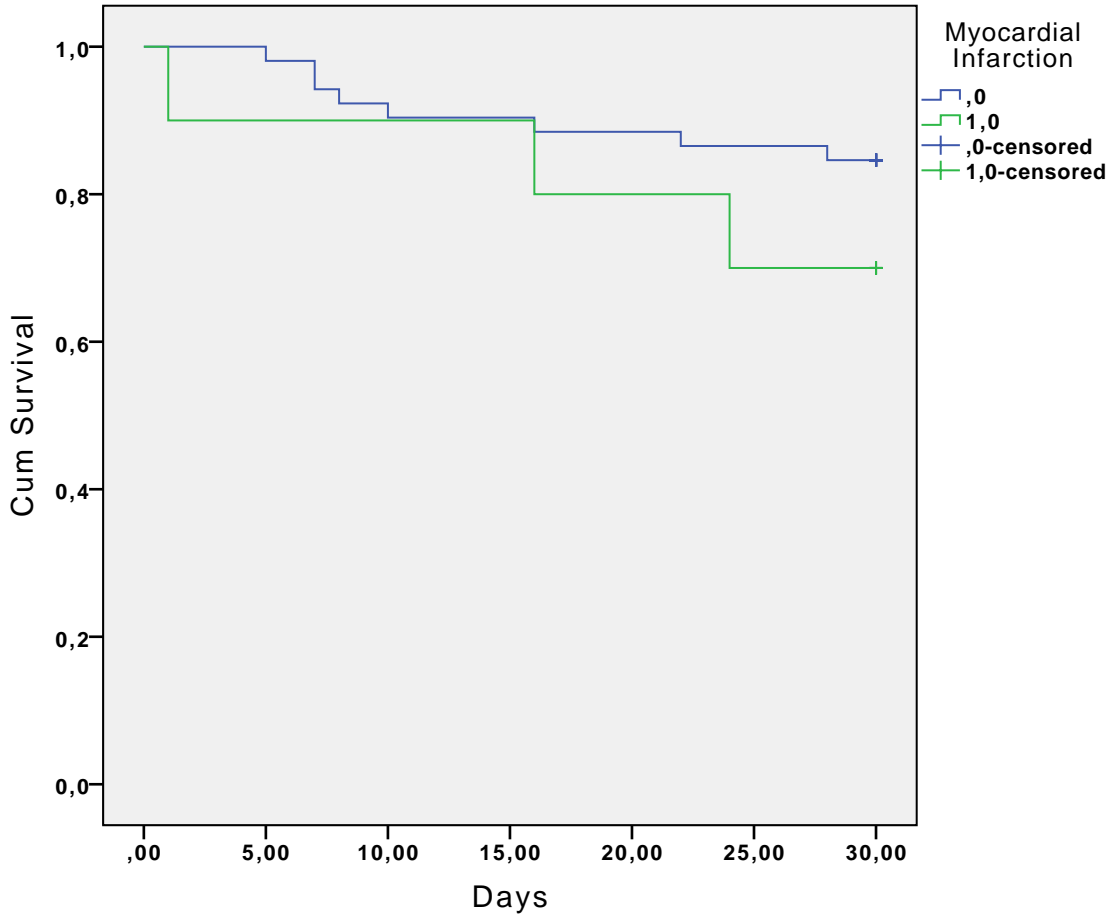

### PERIPHERAL ARTERIAL DISEASE (0=NO, 1=YES)

#### Case Processing Summary

| Peripheral Arterial Disease | Total N | N of Events | Censored |         |
|-----------------------------|---------|-------------|----------|---------|
|                             |         |             | N        | Percent |
| ,0                          | 51      | 8           | 43       | 84,3%   |
| 1,0                         | 11      | 3           | 8        | 72,7%   |
| Overall                     | 62      | 11          | 51       | 82,3%   |

Survival Table

| Peripheral Arterial Disease | Time | Status | Cumulative Proportion Surviving at the Time |            | N of Cumulative Events | N of Remaining Cases |    |
|-----------------------------|------|--------|---------------------------------------------|------------|------------------------|----------------------|----|
|                             |      |        | Estimate                                    | Std. Error |                        |                      |    |
| ,0                          | 1    | 5,000  | 1,00                                        | ,980       | ,019                   | 1                    | 50 |
|                             | 2    | 7,000  | 1,00                                        | .          | .                      | 2                    | 49 |
|                             | 3    | 7,000  | 1,00                                        | ,941       | ,033                   | 3                    | 48 |
|                             | 4    | 8,000  | 1,00                                        | ,922       | ,038                   | 4                    | 47 |
|                             | 5    | 10,000 | 1,00                                        | ,902       | ,042                   | 5                    | 46 |
|                             | 6    | 16,000 | 1,00                                        | ,882       | ,045                   | 6                    | 45 |
|                             | 7    | 22,000 | 1,00                                        | ,863       | ,048                   | 7                    | 44 |
|                             | 8    | 28,000 | 1,00                                        | ,843       | ,051                   | 8                    | 43 |
|                             | 9    | 30,000 | ,00                                         | .          | .                      | 8                    | 42 |
|                             | 10   | 30,000 | ,00                                         | .          | .                      | 8                    | 41 |
|                             | 11   | 30,000 | ,00                                         | .          | .                      | 8                    | 40 |
|                             | 12   | 30,000 | ,00                                         | .          | .                      | 8                    | 39 |
|                             | 13   | 30,000 | ,00                                         | .          | .                      | 8                    | 38 |
|                             | 14   | 30,000 | ,00                                         | .          | .                      | 8                    | 37 |
|                             | 15   | 30,000 | ,00                                         | .          | .                      | 8                    | 36 |
|                             | 16   | 30,000 | ,00                                         | .          | .                      | 8                    | 35 |
|                             | 17   | 30,000 | ,00                                         | .          | .                      | 8                    | 34 |
|                             | 18   | 30,000 | ,00                                         | .          | .                      | 8                    | 33 |
|                             | 19   | 30,000 | ,00                                         | .          | .                      | 8                    | 32 |
|                             | 20   | 30,000 | ,00                                         | .          | .                      | 8                    | 31 |
|                             | 21   | 30,000 | ,00                                         | .          | .                      | 8                    | 30 |
|                             | 22   | 30,000 | ,00                                         | .          | .                      | 8                    | 29 |
|                             | 23   | 30,000 | ,00                                         | .          | .                      | 8                    | 28 |
|                             | 24   | 30,000 | ,00                                         | .          | .                      | 8                    | 27 |
|                             | 25   | 30,000 | ,00                                         | .          | .                      | 8                    | 26 |
|                             | 26   | 30,000 | ,00                                         | .          | .                      | 8                    | 25 |
|                             | 27   | 30,000 | ,00                                         | .          | .                      | 8                    | 24 |
|                             | 28   | 30,000 | ,00                                         | .          | .                      | 8                    | 23 |
|                             | 29   | 30,000 | ,00                                         | .          | .                      | 8                    | 22 |
|                             | 30   | 30,000 | ,00                                         | .          | .                      | 8                    | 21 |
|                             | 31   | 30,000 | ,00                                         | .          | .                      | 8                    | 20 |
|                             | 32   | 30,000 | ,00                                         | .          | .                      | 8                    | 19 |
|                             | 33   | 30,000 | ,00                                         | .          | .                      | 8                    | 18 |
|                             | 34   | 30,000 | ,00                                         | .          | .                      | 8                    | 17 |
|                             | 35   | 30,000 | ,00                                         | .          | .                      | 8                    | 16 |
|                             | 36   | 30,000 | ,00                                         | .          | .                      | 8                    | 15 |
|                             | 37   | 30,000 | ,00                                         | .          | .                      | 8                    | 14 |
|                             | 38   | 30,000 | ,00                                         | .          | .                      | 8                    | 13 |
|                             | 39   | 30,000 | ,00                                         | .          | .                      | 8                    | 12 |
|                             | 40   | 30,000 | ,00                                         | .          | .                      | 8                    | 11 |
|                             | 41   | 30,000 | ,00                                         | .          | .                      | 8                    | 10 |
|                             | 42   | 30,000 | ,00                                         | .          | .                      | 8                    | 9  |
|                             | 43   | 30,000 | ,00                                         | .          | .                      | 8                    | 8  |
|                             | 44   | 30,000 | ,00                                         | .          | .                      | 8                    | 7  |
|                             | 45   | 30,000 | ,00                                         | .          | .                      | 8                    | 6  |
|                             | 46   | 30,000 | ,00                                         | .          | .                      | 8                    | 5  |
|                             | 47   | 30,000 | ,00                                         | .          | .                      | 8                    | 4  |
|                             | 48   | 30,000 | ,00                                         | .          | .                      | 8                    | 3  |
|                             | 49   | 30,000 | ,00                                         | .          | .                      | 8                    | 2  |

Survival Table

| Peripheral Arterial Disease | Time   | Status | Cumulative Proportion Surviving at the Time |            | N of Cumulative Events | N of Remaining Cases |
|-----------------------------|--------|--------|---------------------------------------------|------------|------------------------|----------------------|
|                             |        |        | Estimate                                    | Std. Error |                        |                      |
| 50                          | 30,000 | ,00    | .                                           | .          | 8                      | 1                    |
| 51                          | 30,000 | ,00    | .                                           | .          | 8                      | 0                    |
| 1,0                         | 1,000  | 1,00   | ,909                                        | ,087       | 1                      | 10                   |
| 2                           | 16,000 | 1,00   | ,818                                        | ,116       | 2                      | 9                    |
| 3                           | 24,000 | 1,00   | ,727                                        | ,134       | 3                      | 8                    |
| 4                           | 30,000 | ,00    | .                                           | .          | 3                      | 7                    |
| 5                           | 30,000 | ,00    | .                                           | .          | 3                      | 6                    |
| 6                           | 30,000 | ,00    | .                                           | .          | 3                      | 5                    |
| 7                           | 30,000 | ,00    | .                                           | .          | 3                      | 4                    |
| 8                           | 30,000 | ,00    | .                                           | .          | 3                      | 3                    |
| 9                           | 30,000 | ,00    | .                                           | .          | 3                      | 2                    |
| 10                          | 30,000 | ,00    | .                                           | .          | 3                      | 1                    |
| 11                          | 30,000 | ,00    | .                                           | .          | 3                      | 0                    |

Means and Medians for Survival Time

| Peripheral Arterial Disease | Mean <sup>a</sup> |            |                         |             | Median   |            |             |
|-----------------------------|-------------------|------------|-------------------------|-------------|----------|------------|-------------|
|                             | Estimate          | Std. Error | 95% Confidence Interval |             | Estimate | Std. Error | 95% ...     |
|                             |                   |            | Lower Bound             | Upper Bound |          |            | Lower Bound |
| ,0                          | 27,314            | ,973       | 25,406                  | 29,221      | .        | .          | .           |
| 1,0                         | 25,545            | 2,658      | 20,336                  | 30,755      | .        | .          | .           |
| Overall                     | 27,000            | ,933       | 25,171                  | 28,829      | .        | .          | .           |

Means and Medians for Survival Time

| Peripheral Arterial Disease | Median      |
|-----------------------------|-------------|
|                             | 95% ...     |
|                             | Upper Bound |
| ,0                          | .           |
| 1,0                         | .           |
| Overall                     | .           |

a. Estimation is limited to the largest survival time if it is censored.

Overall Comparisons

|                       | Chi-Square | df | Sig. |
|-----------------------|------------|----|------|
| Log Rank (Mantel-Cox) | ,828       | 1  | ,363 |

Test of equality of survival distributions for the different levels of Peripheral Arterial Disease

### Survival Functions

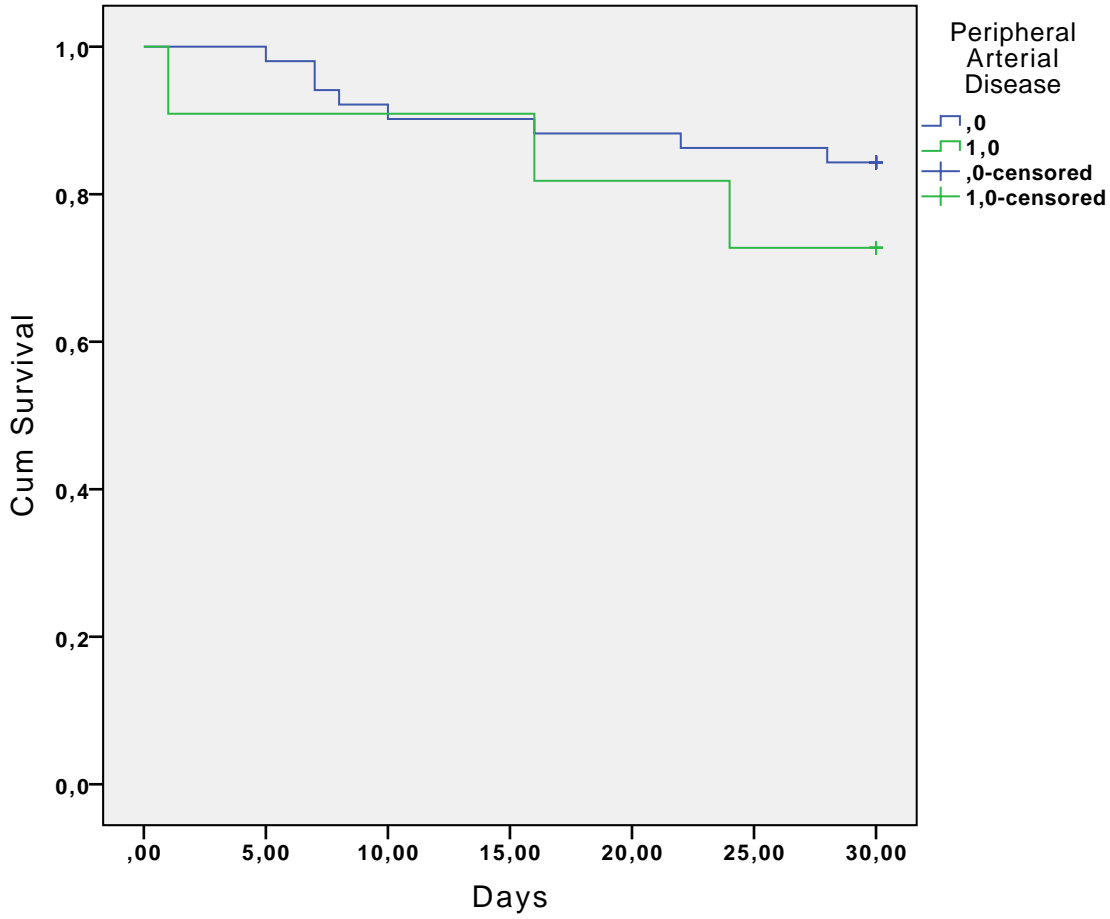

### CEREBROVASCULAR DISEASE (0=NO, 1=YES)

#### Case Processing Summary

| Cerebrovascular Disease | Total N | N of Events | Censored |         |
|-------------------------|---------|-------------|----------|---------|
|                         |         |             | N        | Percent |
| ,0                      | 44      | 7           | 37       | 84,1%   |
| 1,0                     | 18      | 4           | 14       | 77,8%   |
| Overall                 | 62      | 11          | 51       | 82,3%   |

Survival Table

| Cerebrovascular Disease | Time | Status | Cumulative Proportion Surviving at the Time |            | N of Cumulative Events | N of Remaining Cases |
|-------------------------|------|--------|---------------------------------------------|------------|------------------------|----------------------|
|                         |      |        | Estimate                                    | Std. Error |                        |                      |
| ,0                      | 1    | 1,00   | ,977                                        | ,022       | 1                      | 43                   |
|                         | 2    | 1,00   | ,955                                        | ,031       | 2                      | 42                   |
|                         | 3    | 1,00   | ,932                                        | ,038       | 3                      | 41                   |
|                         | 4    | 1,00   | ,909                                        | ,043       | 4                      | 40                   |
|                         | 5    | 1,00   | ,886                                        | ,048       | 5                      | 39                   |
|                         | 6    | 1,00   | ,864                                        | ,052       | 6                      | 38                   |
|                         | 7    | 1,00   | ,841                                        | ,055       | 7                      | 37                   |
|                         | 8    | ,00    | .                                           | .          | 7                      | 36                   |
|                         | 9    | ,00    | .                                           | .          | 7                      | 35                   |
|                         | 10   | ,00    | .                                           | .          | 7                      | 34                   |
|                         | 11   | ,00    | .                                           | .          | 7                      | 33                   |
|                         | 12   | ,00    | .                                           | .          | 7                      | 32                   |
|                         | 13   | ,00    | .                                           | .          | 7                      | 31                   |
|                         | 14   | ,00    | .                                           | .          | 7                      | 30                   |
|                         | 15   | ,00    | .                                           | .          | 7                      | 29                   |
|                         | 16   | ,00    | .                                           | .          | 7                      | 28                   |
|                         | 17   | ,00    | .                                           | .          | 7                      | 27                   |
|                         | 18   | ,00    | .                                           | .          | 7                      | 26                   |
|                         | 19   | ,00    | .                                           | .          | 7                      | 25                   |
|                         | 20   | ,00    | .                                           | .          | 7                      | 24                   |
|                         | 21   | ,00    | .                                           | .          | 7                      | 23                   |
|                         | 22   | ,00    | .                                           | .          | 7                      | 22                   |
|                         | 23   | ,00    | .                                           | .          | 7                      | 21                   |
|                         | 24   | ,00    | .                                           | .          | 7                      | 20                   |
|                         | 25   | ,00    | .                                           | .          | 7                      | 19                   |
|                         | 26   | ,00    | .                                           | .          | 7                      | 18                   |
|                         | 27   | ,00    | .                                           | .          | 7                      | 17                   |
|                         | 28   | ,00    | .                                           | .          | 7                      | 16                   |
|                         | 29   | ,00    | .                                           | .          | 7                      | 15                   |
|                         | 30   | ,00    | .                                           | .          | 7                      | 14                   |
|                         | 31   | ,00    | .                                           | .          | 7                      | 13                   |
|                         | 32   | ,00    | .                                           | .          | 7                      | 12                   |
|                         | 33   | ,00    | .                                           | .          | 7                      | 11                   |
|                         | 34   | ,00    | .                                           | .          | 7                      | 10                   |
|                         | 35   | ,00    | .                                           | .          | 7                      | 9                    |
|                         | 36   | ,00    | .                                           | .          | 7                      | 8                    |
|                         | 37   | ,00    | .                                           | .          | 7                      | 7                    |
|                         | 38   | ,00    | .                                           | .          | 7                      | 6                    |
|                         | 39   | ,00    | .                                           | .          | 7                      | 5                    |
|                         | 40   | ,00    | .                                           | .          | 7                      | 4                    |
|                         | 41   | ,00    | .                                           | .          | 7                      | 3                    |
|                         | 42   | ,00    | .                                           | .          | 7                      | 2                    |
|                         | 43   | ,00    | .                                           | .          | 7                      | 1                    |
|                         | 44   | ,00    | .                                           | .          | 7                      | 0                    |
| 1,0                     | 1    | 1,00   | .                                           | .          | 1                      | 17                   |
|                         | 2    | 1,00   | ,889                                        | ,074       | 2                      | 16                   |
|                         | 3    | 1,00   | ,833                                        | ,088       | 3                      | 15                   |
|                         | 4    | 1,00   | ,778                                        | ,098       | 4                      | 14                   |
|                         | 5    | ,00    | .                                           | .          | 4                      | 13                   |

Survival Table

| Cerebrovascular Disease | Time   | Status | Cumulative Proportion Surviving at the Time |            | N of Cumulative Events | N of Remaining Cases |
|-------------------------|--------|--------|---------------------------------------------|------------|------------------------|----------------------|
|                         |        |        | Estimate                                    | Std. Error |                        |                      |
| 6                       | 30,000 | ,00    | .                                           | .          | 4                      | 12                   |
| 7                       | 30,000 | ,00    | .                                           | .          | 4                      | 11                   |
| 8                       | 30,000 | ,00    | .                                           | .          | 4                      | 10                   |
| 9                       | 30,000 | ,00    | .                                           | .          | 4                      | 9                    |
| 10                      | 30,000 | ,00    | .                                           | .          | 4                      | 8                    |
| 11                      | 30,000 | ,00    | .                                           | .          | 4                      | 7                    |
| 12                      | 30,000 | ,00    | .                                           | .          | 4                      | 6                    |
| 13                      | 30,000 | ,00    | .                                           | .          | 4                      | 5                    |
| 14                      | 30,000 | ,00    | .                                           | .          | 4                      | 4                    |
| 15                      | 30,000 | ,00    | .                                           | .          | 4                      | 3                    |
| 16                      | 30,000 | ,00    | .                                           | .          | 4                      | 2                    |
| 17                      | 30,000 | ,00    | .                                           | .          | 4                      | 1                    |
| 18                      | 30,000 | ,00    | .                                           | .          | 4                      | 0                    |

Means and Medians for Survival Time

| Cerebrovascular Disease | Mean <sup>a</sup> |            |                         |             | Median   |            |             |
|-------------------------|-------------------|------------|-------------------------|-------------|----------|------------|-------------|
|                         | Estimate          | Std. Error | 95% Confidence Interval |             | Estimate | Std. Error | 95% ...     |
|                         |                   |            | Lower Bound             | Upper Bound |          |            | Lower Bound |
| ,0                      | 27,182            | 1,089      | 25,047                  | 29,317      | .        | .          | .           |
| 1,0                     | 26,556            | 1,795      | 23,036                  | 30,075      | .        | .          | .           |
| Overall                 | 27,000            | ,933       | 25,171                  | 28,829      | .        | .          | .           |

Means and Medians for Survival Time

| Cerebrovascular Disease | Median      |
|-------------------------|-------------|
|                         | 95% ...     |
|                         | Upper Bound |
| ,0                      | .           |
| 1,0                     | .           |
| Overall                 | .           |

a. Estimation is limited to the largest survival time if it is censored.

Overall Comparisons

|                       | Chi-Square | df | Sig. |
|-----------------------|------------|----|------|
| Log Rank (Mantel-Cox) | ,313       | 1  | ,576 |

Test of equality of survival distributions for the different levels of Cerebrovascular Disease



### Survival Functions

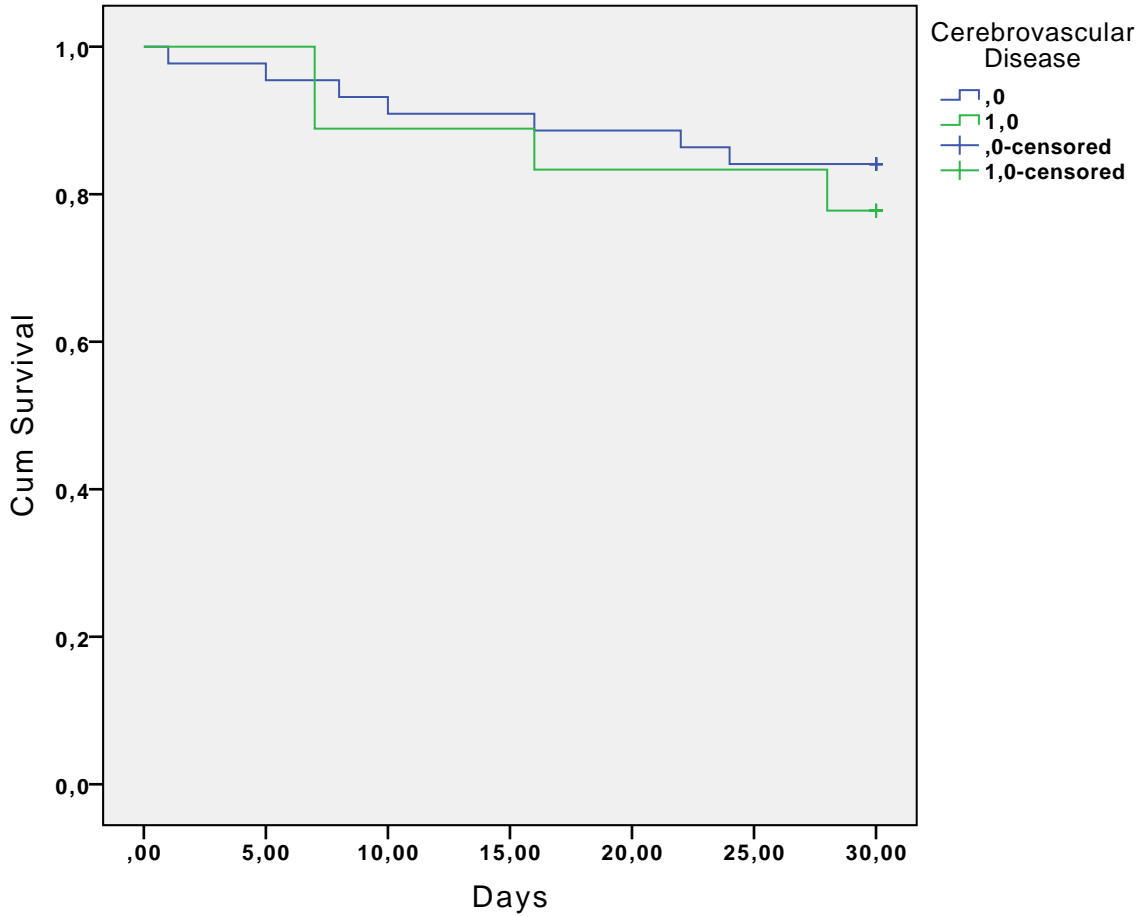

### HEMIPLEGIA (0=NO, 1=YES)

#### Warnings

No statistics are computed because all cases are censored.

#### Case Processing Summary

| Hemiplegia     | Total N   | N of Events | Censored  |              |
|----------------|-----------|-------------|-----------|--------------|
|                |           |             | N         | Percent      |
| ,0             | 55        | 11          | 44        | 80,0%        |
| 1,0            | 7         | 0           | 7         | 100,0%       |
| <b>Overall</b> | <b>62</b> | <b>11</b>   | <b>51</b> | <b>82,3%</b> |

Survival Table

| Hemiplegia | Time | Status | Cumulative Proportion Surviving at the Time |            | N of Cumulative Events | N of Remaining Cases |
|------------|------|--------|---------------------------------------------|------------|------------------------|----------------------|
|            |      |        | Estimate                                    | Std. Error |                        |                      |
| ,0         | 1    | 1,00   | ,982                                        | ,018       | 1                      | 54                   |
|            | 2    | 1,00   | ,964                                        | ,025       | 2                      | 53                   |
|            | 3    | 1,00   | .                                           | .          | 3                      | 52                   |
|            | 4    | 1,00   | ,927                                        | ,035       | 4                      | 51                   |
|            | 5    | 1,00   | ,909                                        | ,039       | 5                      | 50                   |
|            | 6    | 1,00   | ,891                                        | ,042       | 6                      | 49                   |
|            | 7    | 1,00   | .                                           | .          | 7                      | 48                   |
|            | 8    | 1,00   | ,855                                        | ,048       | 8                      | 47                   |
|            | 9    | 1,00   | ,836                                        | ,050       | 9                      | 46                   |
|            | 10   | 1,00   | ,818                                        | ,052       | 10                     | 45                   |
|            | 11   | 1,00   | ,800                                        | ,054       | 11                     | 44                   |
|            | 12   | ,00    | .                                           | .          | 11                     | 43                   |
|            | 13   | ,00    | .                                           | .          | 11                     | 42                   |
|            | 14   | ,00    | .                                           | .          | 11                     | 41                   |
|            | 15   | ,00    | .                                           | .          | 11                     | 40                   |
|            | 16   | ,00    | .                                           | .          | 11                     | 39                   |
|            | 17   | ,00    | .                                           | .          | 11                     | 38                   |
|            | 18   | ,00    | .                                           | .          | 11                     | 37                   |
|            | 19   | ,00    | .                                           | .          | 11                     | 36                   |
|            | 20   | ,00    | .                                           | .          | 11                     | 35                   |
|            | 21   | ,00    | .                                           | .          | 11                     | 34                   |
|            | 22   | ,00    | .                                           | .          | 11                     | 33                   |
|            | 23   | ,00    | .                                           | .          | 11                     | 32                   |
|            | 24   | ,00    | .                                           | .          | 11                     | 31                   |
|            | 25   | ,00    | .                                           | .          | 11                     | 30                   |
|            | 26   | ,00    | .                                           | .          | 11                     | 29                   |
|            | 27   | ,00    | .                                           | .          | 11                     | 28                   |
|            | 28   | ,00    | .                                           | .          | 11                     | 27                   |
|            | 29   | ,00    | .                                           | .          | 11                     | 26                   |
|            | 30   | ,00    | .                                           | .          | 11                     | 25                   |
|            | 31   | ,00    | .                                           | .          | 11                     | 24                   |
|            | 32   | ,00    | .                                           | .          | 11                     | 23                   |
|            | 33   | ,00    | .                                           | .          | 11                     | 22                   |
|            | 34   | ,00    | .                                           | .          | 11                     | 21                   |
|            | 35   | ,00    | .                                           | .          | 11                     | 20                   |
|            | 36   | ,00    | .                                           | .          | 11                     | 19                   |
|            | 37   | ,00    | .                                           | .          | 11                     | 18                   |
|            | 38   | ,00    | .                                           | .          | 11                     | 17                   |
|            | 39   | ,00    | .                                           | .          | 11                     | 16                   |
|            | 40   | ,00    | .                                           | .          | 11                     | 15                   |
|            | 41   | ,00    | .                                           | .          | 11                     | 14                   |
|            | 42   | ,00    | .                                           | .          | 11                     | 13                   |
|            | 43   | ,00    | .                                           | .          | 11                     | 12                   |
|            | 44   | ,00    | .                                           | .          | 11                     | 11                   |
|            | 45   | ,00    | .                                           | .          | 11                     | 10                   |
|            | 46   | ,00    | .                                           | .          | 11                     | 9                    |
|            | 47   | ,00    | .                                           | .          | 11                     | 8                    |
|            | 48   | ,00    | .                                           | .          | 11                     | 7                    |
|            | 49   | ,00    | .                                           | .          | 11                     | 6                    |

Survival Table

| Hemiplegia | Time   | Status | Cumulative Proportion Surviving at the Time |            | N of Cumulative Events | N of Remaining Cases |
|------------|--------|--------|---------------------------------------------|------------|------------------------|----------------------|
|            |        |        | Estimate                                    | Std. Error |                        |                      |
| 50         | 30,000 | ,00    | .                                           | .          | 11                     | 5                    |
| 51         | 30,000 | ,00    | .                                           | .          | 11                     | 4                    |
| 52         | 30,000 | ,00    | .                                           | .          | 11                     | 3                    |
| 53         | 30,000 | ,00    | .                                           | .          | 11                     | 2                    |
| 54         | 30,000 | ,00    | .                                           | .          | 11                     | 1                    |
| 55         | 30,000 | ,00    | .                                           | .          | 11                     | 0                    |
| 1,0 1      | 30,000 | ,00    | .                                           | .          | 0                      | 6                    |
| 2          | 30,000 | ,00    | .                                           | .          | 0                      | 5                    |
| 3          | 30,000 | ,00    | .                                           | .          | 0                      | 4                    |
| 4          | 30,000 | ,00    | .                                           | .          | 0                      | 3                    |
| 5          | 30,000 | ,00    | .                                           | .          | 0                      | 2                    |
| 6          | 30,000 | ,00    | .                                           | .          | 0                      | 1                    |

Overall Comparisons

|                       | Chi-Square | df | Sig. |
|-----------------------|------------|----|------|
| Log Rank (Mantel-Cox) | 1,550      | 1  | ,213 |

Test of equality of survival distributions for the different levels of Hemiplegia

Survival Functions

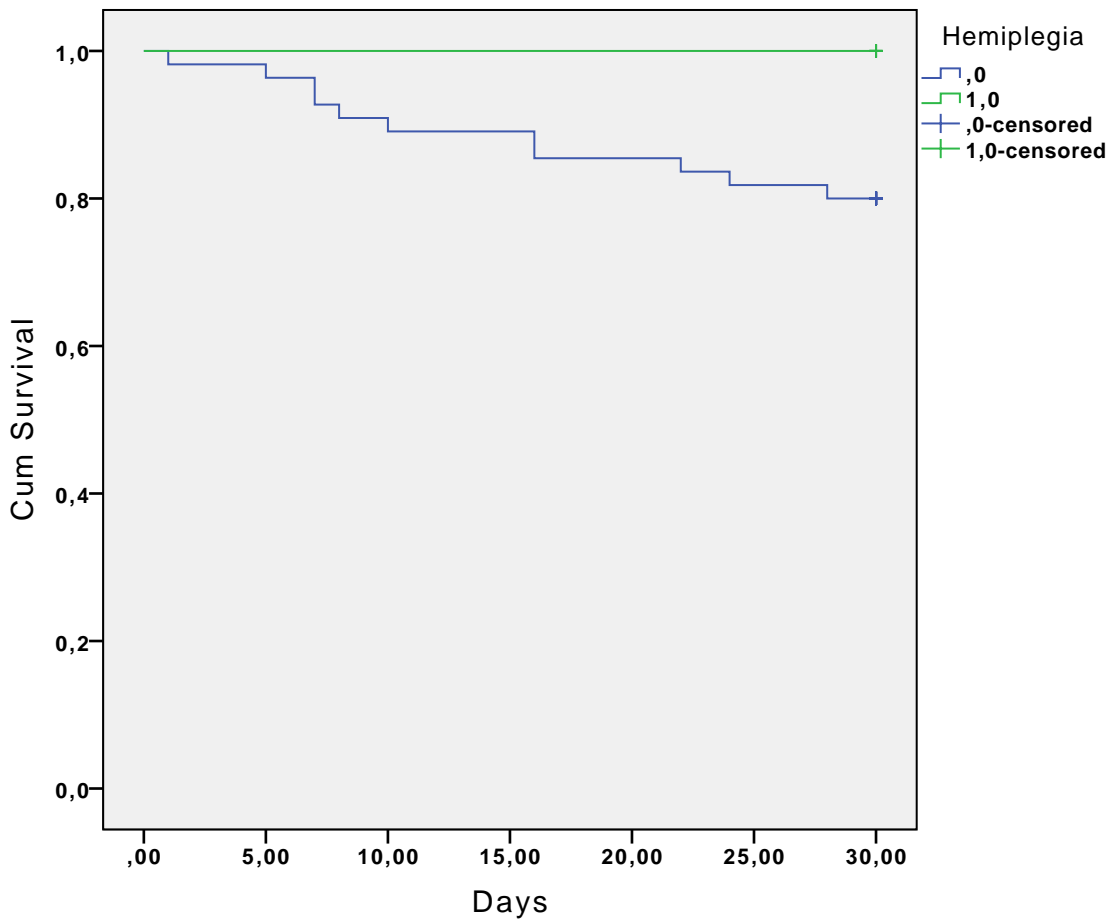

ULCUS (0=NO, 1=YES)

Case Processing Summary

| Ulcus   | Total N | N of Events | Censored |         |
|---------|---------|-------------|----------|---------|
|         |         |             | N        | Percent |
| ,0      | 54      | 10          | 44       | 81,5%   |
| 1,0     | 8       | 1           | 7        | 87,5%   |
| Overall | 62      | 11          | 51       | 82,3%   |

Survival Table

| Ulcus | Time | Status | Cumulative Proportion Surviving at the Time |            | N of Cumulative Events | N of Remaining Cases |
|-------|------|--------|---------------------------------------------|------------|------------------------|----------------------|
|       |      |        | Estimate                                    | Std. Error |                        |                      |
| ,0    | 1    | 1,00   | ,981                                        | ,018       | 1                      | 53                   |
|       | 2    | 1,00   | ,963                                        | ,026       | 2                      | 52                   |
|       | 3    | 1,00   | .                                           | .          | 3                      | 51                   |
|       | 4    | 1,00   | ,926                                        | ,036       | 4                      | 50                   |
|       | 5    | 1,00   | ,907                                        | ,039       | 5                      | 49                   |
|       | 6    | 1,00   | ,889                                        | ,043       | 6                      | 48                   |
|       | 7    | 1,00   | ,870                                        | ,046       | 7                      | 47                   |
|       | 8    | 1,00   | ,852                                        | ,048       | 8                      | 46                   |
|       | 9    | 1,00   | ,833                                        | ,051       | 9                      | 45                   |
|       | 10   | 1,00   | ,815                                        | ,053       | 10                     | 44                   |
|       | 11   | ,00    | .                                           | .          | 10                     | 43                   |
|       | 12   | ,00    | .                                           | .          | 10                     | 42                   |
|       | 13   | ,00    | .                                           | .          | 10                     | 41                   |
|       | 14   | ,00    | .                                           | .          | 10                     | 40                   |
|       | 15   | ,00    | .                                           | .          | 10                     | 39                   |
|       | 16   | ,00    | .                                           | .          | 10                     | 38                   |
|       | 17   | ,00    | .                                           | .          | 10                     | 37                   |
|       | 18   | ,00    | .                                           | .          | 10                     | 36                   |
|       | 19   | ,00    | .                                           | .          | 10                     | 35                   |
|       | 20   | ,00    | .                                           | .          | 10                     | 34                   |
|       | 21   | ,00    | .                                           | .          | 10                     | 33                   |
|       | 22   | ,00    | .                                           | .          | 10                     | 32                   |
|       | 23   | ,00    | .                                           | .          | 10                     | 31                   |
|       | 24   | ,00    | .                                           | .          | 10                     | 30                   |
|       | 25   | ,00    | .                                           | .          | 10                     | 29                   |
|       | 26   | ,00    | .                                           | .          | 10                     | 28                   |
|       | 27   | ,00    | .                                           | .          | 10                     | 27                   |
|       | 28   | ,00    | .                                           | .          | 10                     | 26                   |
|       | 29   | ,00    | .                                           | .          | 10                     | 25                   |
|       | 30   | ,00    | .                                           | .          | 10                     | 24                   |
|       | 31   | ,00    | .                                           | .          | 10                     | 23                   |
|       | 32   | ,00    | .                                           | .          | 10                     | 22                   |
|       | 33   | ,00    | .                                           | .          | 10                     | 21                   |
|       | 34   | ,00    | .                                           | .          | 10                     | 20                   |
|       | 35   | ,00    | .                                           | .          | 10                     | 19                   |
|       | 36   | ,00    | .                                           | .          | 10                     | 18                   |
|       | 37   | ,00    | .                                           | .          | 10                     | 17                   |
|       | 38   | ,00    | .                                           | .          | 10                     | 16                   |
|       | 39   | ,00    | .                                           | .          | 10                     | 15                   |
|       | 40   | ,00    | .                                           | .          | 10                     | 14                   |
|       | 41   | ,00    | .                                           | .          | 10                     | 13                   |
|       | 42   | ,00    | .                                           | .          | 10                     | 12                   |

Survival Table

| Ulcus | Time   | Status | Cumulative Proportion Surviving at the Time |            | N of Cumulative Events | N of Remaining Cases |
|-------|--------|--------|---------------------------------------------|------------|------------------------|----------------------|
|       |        |        | Estimate                                    | Std. Error |                        |                      |
| 43    | 30,000 | ,00    | .                                           | .          | 10                     | 11                   |
| 44    | 30,000 | ,00    | .                                           | .          | 10                     | 10                   |
| 45    | 30,000 | ,00    | .                                           | .          | 10                     | 9                    |
| 46    | 30,000 | ,00    | .                                           | .          | 10                     | 8                    |
| 47    | 30,000 | ,00    | .                                           | .          | 10                     | 7                    |
| 48    | 30,000 | ,00    | .                                           | .          | 10                     | 6                    |
| 49    | 30,000 | ,00    | .                                           | .          | 10                     | 5                    |
| 50    | 30,000 | ,00    | .                                           | .          | 10                     | 4                    |
| 51    | 30,000 | ,00    | .                                           | .          | 10                     | 3                    |
| 52    | 30,000 | ,00    | .                                           | .          | 10                     | 2                    |
| 53    | 30,000 | ,00    | .                                           | .          | 10                     | 1                    |
| 54    | 30,000 | ,00    | .                                           | .          | 10                     | 0                    |
| 1,0   | 1      | 1,00   | ,875                                        | ,117       | 1                      | 7                    |
|       | 2      | 30,000 | .                                           | .          | 1                      | 6                    |
|       | 3      | 30,000 | .                                           | .          | 1                      | 5                    |
|       | 4      | 30,000 | .                                           | .          | 1                      | 4                    |
|       | 5      | 30,000 | .                                           | .          | 1                      | 3                    |
|       | 6      | 30,000 | .                                           | .          | 1                      | 2                    |
|       | 7      | 30,000 | .                                           | .          | 1                      | 1                    |
|       | 8      | 30,000 | .                                           | .          | 1                      | 0                    |

Means and Medians for Survival Time

| Ulcus   | Mean <sup>a</sup> |            |                         |             | Median   |            |                         |             |
|---------|-------------------|------------|-------------------------|-------------|----------|------------|-------------------------|-------------|
|         | Estimate          | Std. Error | 95% Confidence Interval |             | Estimate | Std. Error | 95% Confidence Interval |             |
|         |                   |            | Lower Bound             | Upper Bound |          |            | Lower Bound             | Upper Bound |
| ,0      | 26,815            | 1,041      | 24,774                  | 28,855      | .        | .          | .                       | .           |
| 1,0     | 28,250            | 1,637      | 25,042                  | 31,458      | .        | .          | .                       | .           |
| Overall | 27,000            | ,933       | 25,171                  | 28,829      | .        | .          | .                       | .           |

a. Estimation is limited to the largest survival time if it is censored.

## Overall Comparisons

|                       | Chi-Square | df | Sig. |
|-----------------------|------------|----|------|
| Log Rank (Mantel-Cox) | ,186       | 1  | ,666 |

Test of equality of survival distributions for the different levels of Ulcus

### Survival Functions

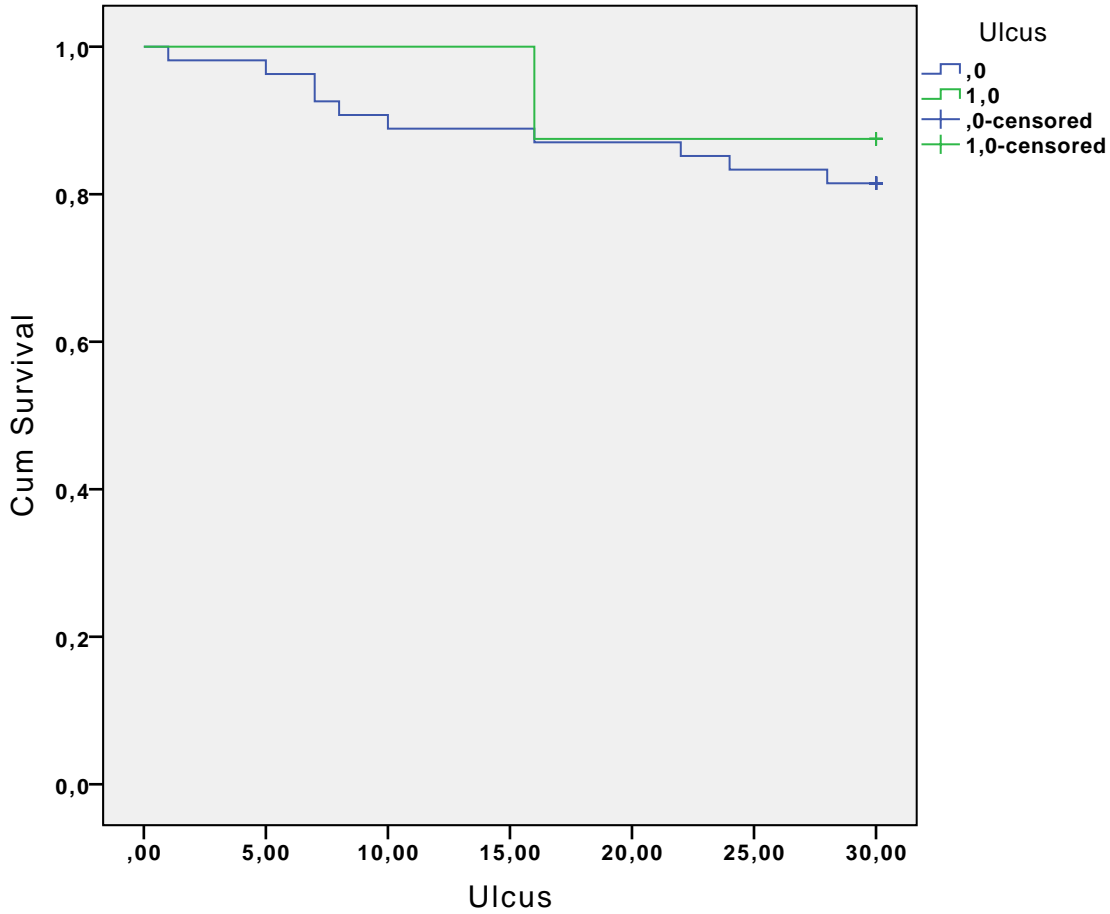

### CHRONIC KIDNEY DISEASE (0=NO, 1=YES)

#### Case Processing Summary

| Chronic Kidney Disease | Total N | N of Events | Censored |         |
|------------------------|---------|-------------|----------|---------|
|                        |         |             | N        | Percent |
| ,0                     | 49      | 6           | 43       | 87,8%   |
| 1,0                    | 13      | 5           | 8        | 61,5%   |
| Overall                | 62      | 11          | 51       | 82,3%   |

Survival Table

| Chronic Kidney Disease | Time | Status | Cumulative Proportion Surviving at the Time |            | N of Cumulative Events | N of Remaining Cases |    |
|------------------------|------|--------|---------------------------------------------|------------|------------------------|----------------------|----|
|                        |      |        | Estimate                                    | Std. Error |                        |                      |    |
| ,0                     | 1    | 5,000  | 1,00                                        | ,980       | ,020                   | 1                    | 48 |
|                        | 2    | 7,000  | 1,00                                        | ,959       | ,028                   | 2                    | 47 |
|                        | 3    | 10,000 | 1,00                                        | ,939       | ,034                   | 3                    | 46 |
|                        | 4    | 16,000 | 1,00                                        | ,918       | ,039                   | 4                    | 45 |
|                        | 5    | 22,000 | 1,00                                        | ,898       | ,043                   | 5                    | 44 |
|                        | 6    | 24,000 | 1,00                                        | ,878       | ,047                   | 6                    | 43 |
|                        | 7    | 30,000 | ,00                                         | .          | .                      | 6                    | 42 |
|                        | 8    | 30,000 | ,00                                         | .          | .                      | 6                    | 41 |
|                        | 9    | 30,000 | ,00                                         | .          | .                      | 6                    | 40 |
|                        | 10   | 30,000 | ,00                                         | .          | .                      | 6                    | 39 |
|                        | 11   | 30,000 | ,00                                         | .          | .                      | 6                    | 38 |
|                        | 12   | 30,000 | ,00                                         | .          | .                      | 6                    | 37 |
|                        | 13   | 30,000 | ,00                                         | .          | .                      | 6                    | 36 |
|                        | 14   | 30,000 | ,00                                         | .          | .                      | 6                    | 35 |
|                        | 15   | 30,000 | ,00                                         | .          | .                      | 6                    | 34 |
|                        | 16   | 30,000 | ,00                                         | .          | .                      | 6                    | 33 |
|                        | 17   | 30,000 | ,00                                         | .          | .                      | 6                    | 32 |
|                        | 18   | 30,000 | ,00                                         | .          | .                      | 6                    | 31 |
|                        | 19   | 30,000 | ,00                                         | .          | .                      | 6                    | 30 |
|                        | 20   | 30,000 | ,00                                         | .          | .                      | 6                    | 29 |
|                        | 21   | 30,000 | ,00                                         | .          | .                      | 6                    | 28 |
|                        | 22   | 30,000 | ,00                                         | .          | .                      | 6                    | 27 |
|                        | 23   | 30,000 | ,00                                         | .          | .                      | 6                    | 26 |
|                        | 24   | 30,000 | ,00                                         | .          | .                      | 6                    | 25 |
|                        | 25   | 30,000 | ,00                                         | .          | .                      | 6                    | 24 |
|                        | 26   | 30,000 | ,00                                         | .          | .                      | 6                    | 23 |
|                        | 27   | 30,000 | ,00                                         | .          | .                      | 6                    | 22 |
|                        | 28   | 30,000 | ,00                                         | .          | .                      | 6                    | 21 |
|                        | 29   | 30,000 | ,00                                         | .          | .                      | 6                    | 20 |
|                        | 30   | 30,000 | ,00                                         | .          | .                      | 6                    | 19 |
|                        | 31   | 30,000 | ,00                                         | .          | .                      | 6                    | 18 |
|                        | 32   | 30,000 | ,00                                         | .          | .                      | 6                    | 17 |
|                        | 33   | 30,000 | ,00                                         | .          | .                      | 6                    | 16 |
|                        | 34   | 30,000 | ,00                                         | .          | .                      | 6                    | 15 |
|                        | 35   | 30,000 | ,00                                         | .          | .                      | 6                    | 14 |
|                        | 36   | 30,000 | ,00                                         | .          | .                      | 6                    | 13 |
|                        | 37   | 30,000 | ,00                                         | .          | .                      | 6                    | 12 |
|                        | 38   | 30,000 | ,00                                         | .          | .                      | 6                    | 11 |
|                        | 39   | 30,000 | ,00                                         | .          | .                      | 6                    | 10 |
|                        | 40   | 30,000 | ,00                                         | .          | .                      | 6                    | 9  |
|                        | 41   | 30,000 | ,00                                         | .          | .                      | 6                    | 8  |
|                        | 42   | 30,000 | ,00                                         | .          | .                      | 6                    | 7  |
|                        | 43   | 30,000 | ,00                                         | .          | .                      | 6                    | 6  |
|                        | 44   | 30,000 | ,00                                         | .          | .                      | 6                    | 5  |
|                        | 45   | 30,000 | ,00                                         | .          | .                      | 6                    | 4  |
|                        | 46   | 30,000 | ,00                                         | .          | .                      | 6                    | 3  |
|                        | 47   | 30,000 | ,00                                         | .          | .                      | 6                    | 2  |
|                        | 48   | 30,000 | ,00                                         | .          | .                      | 6                    | 1  |
|                        | 49   | 30,000 | ,00                                         | .          | .                      | 6                    | 0  |

Survival Table

| Chronic Kidney Disease | Time | Status | Cumulative Proportion Surviving at the Time |            | N of Cumulative Events | N of Remaining Cases |
|------------------------|------|--------|---------------------------------------------|------------|------------------------|----------------------|
|                        |      |        | Estimate                                    | Std. Error |                        |                      |
| 1,0                    | 1    | 1,00   | ,923                                        | ,074       | 1                      | 12                   |
|                        | 2    | 1,00   | ,846                                        | ,100       | 2                      | 11                   |
|                        | 3    | 1,00   | ,769                                        | ,117       | 3                      | 10                   |
|                        | 4    | 1,00   | ,692                                        | ,128       | 4                      | 9                    |
|                        | 5    | 1,00   | ,615                                        | ,135       | 5                      | 8                    |
|                        | 6    | ,00    | .                                           | .          | 5                      | 7                    |
|                        | 7    | ,00    | .                                           | .          | 5                      | 6                    |
|                        | 8    | ,00    | .                                           | .          | 5                      | 5                    |
|                        | 9    | ,00    | .                                           | .          | 5                      | 4                    |
|                        | 10   | ,00    | .                                           | .          | 5                      | 3                    |
|                        | 11   | ,00    | .                                           | .          | 5                      | 2                    |
|                        | 12   | ,00    | .                                           | .          | 5                      | 1                    |
|                        | 13   | ,00    | .                                           | .          | 5                      | 0                    |

Means and Medians for Survival Time

| Chronic Kidney Disease | Mean <sup>a</sup> |            |                         |             | Median   |            |             |
|------------------------|-------------------|------------|-------------------------|-------------|----------|------------|-------------|
|                        | Estimate          | Std. Error | 95% Confidence Interval |             | Estimate | Std. Error | 95% ...     |
|                        |                   |            | Lower Bound             | Upper Bound |          |            | Lower Bound |
| ,0                     | 28,041            | ,832       | 26,410                  | 29,671      | .        | .          | .           |
| 1,0                    | 23,077            | 2,910      | 17,374                  | 28,780      | .        | .          | .           |
| Overall                | 27,000            | ,933       | 25,171                  | 28,829      | .        | .          | .           |

Means and Medians for Survival Time

| Chronic Kidney Disease | Median      |
|------------------------|-------------|
|                        | 95% ...     |
|                        | Upper Bound |
| ,0                     | .           |
| 1,0                    | .           |
| Overall                | .           |

a. Estimation is limited to the largest survival time if it is censored.

Overall Comparisons

|                       | Chi-Square | df | Sig. |
|-----------------------|------------|----|------|
| Log Rank (Mantel-Cox) | 5,324      | 1  | ,021 |

Test of equality of survival distributions for the different levels of Chronic Kidney Disease



### Survival Functions

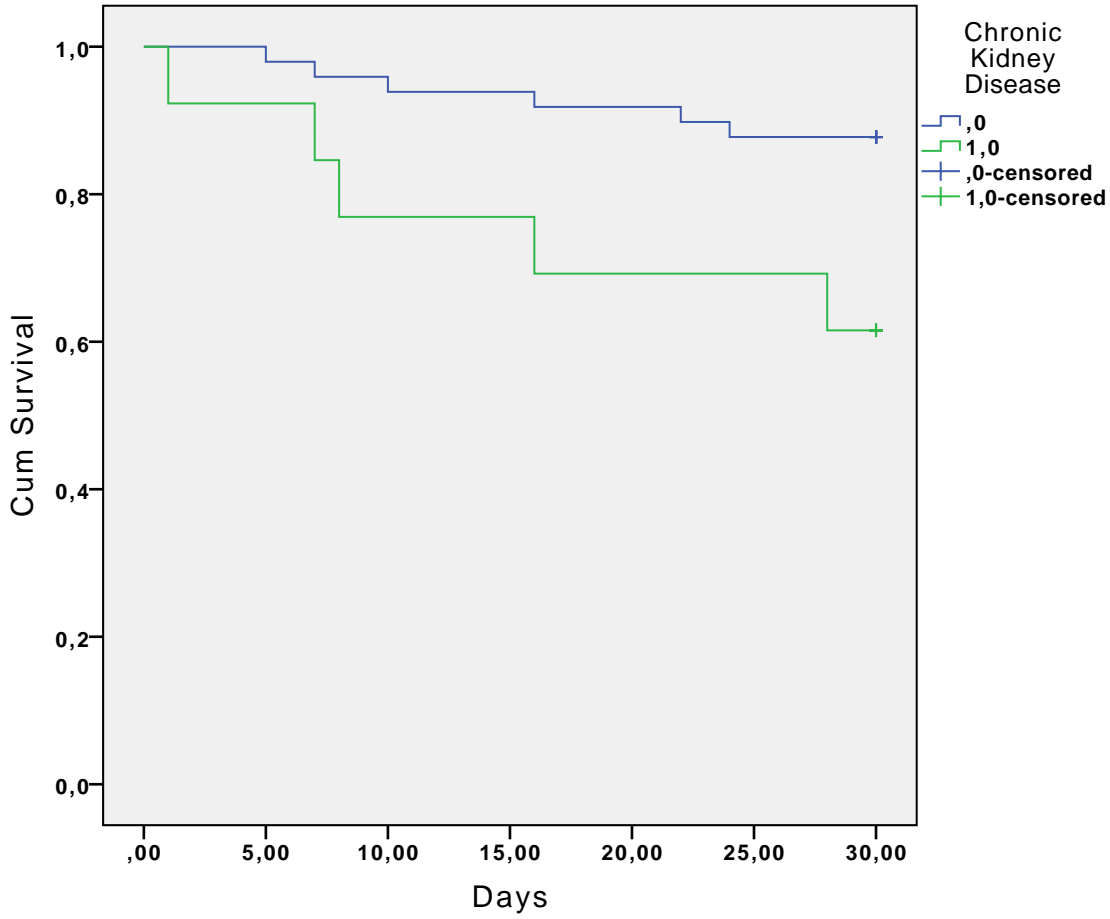

### DIALYSIS (0=NO, 1=YES)

#### Warnings

No comparison analysis is performed because the factor variable has only one value for every stratum.

#### Case Processing Summary

| Dialysis | Total N | N of Events | Censored |         |
|----------|---------|-------------|----------|---------|
|          |         |             | N        | Percent |
| ,0       | 62      | 11          | 51       | 82,3%   |
| Overall  | 62      | 11          | 51       | 82,3%   |

Survival Table

| Dialysis | Time | Status | Cumulative Proportion Surviving at the Time |            | N of Cumulative Events | N of Remaining Cases |
|----------|------|--------|---------------------------------------------|------------|------------------------|----------------------|
|          |      |        | Estimate                                    | Std. Error |                        |                      |
| ,0       | 1    | 1,00   | ,984                                        | ,016       | 1                      | 61                   |
|          | 2    | 1,00   | ,968                                        | ,022       | 2                      | 60                   |
|          | 3    | 1,00   | .                                           | .          | 3                      | 59                   |
|          | 4    | 1,00   | ,935                                        | ,031       | 4                      | 58                   |
|          | 5    | 1,00   | ,919                                        | ,035       | 5                      | 57                   |
|          | 6    | 1,00   | ,903                                        | ,038       | 6                      | 56                   |
|          | 7    | 1,00   | .                                           | .          | 7                      | 55                   |
|          | 8    | 1,00   | ,871                                        | ,043       | 8                      | 54                   |
|          | 9    | 1,00   | ,855                                        | ,045       | 9                      | 53                   |
|          | 10   | 1,00   | ,839                                        | ,047       | 10                     | 52                   |
|          | 11   | 1,00   | ,823                                        | ,049       | 11                     | 51                   |
|          | 12   | ,00    | .                                           | .          | 11                     | 50                   |
|          | 13   | ,00    | .                                           | .          | 11                     | 49                   |
|          | 14   | ,00    | .                                           | .          | 11                     | 48                   |
|          | 15   | ,00    | .                                           | .          | 11                     | 47                   |
|          | 16   | ,00    | .                                           | .          | 11                     | 46                   |
|          | 17   | ,00    | .                                           | .          | 11                     | 45                   |
|          | 18   | ,00    | .                                           | .          | 11                     | 44                   |
|          | 19   | ,00    | .                                           | .          | 11                     | 43                   |
|          | 20   | ,00    | .                                           | .          | 11                     | 42                   |
|          | 21   | ,00    | .                                           | .          | 11                     | 41                   |
|          | 22   | ,00    | .                                           | .          | 11                     | 40                   |
|          | 23   | ,00    | .                                           | .          | 11                     | 39                   |
|          | 24   | ,00    | .                                           | .          | 11                     | 38                   |
|          | 25   | ,00    | .                                           | .          | 11                     | 37                   |
|          | 26   | ,00    | .                                           | .          | 11                     | 36                   |
|          | 27   | ,00    | .                                           | .          | 11                     | 35                   |
|          | 28   | ,00    | .                                           | .          | 11                     | 34                   |
|          | 29   | ,00    | .                                           | .          | 11                     | 33                   |
|          | 30   | ,00    | .                                           | .          | 11                     | 32                   |
|          | 31   | ,00    | .                                           | .          | 11                     | 31                   |
|          | 32   | ,00    | .                                           | .          | 11                     | 30                   |
|          | 33   | ,00    | .                                           | .          | 11                     | 29                   |
|          | 34   | ,00    | .                                           | .          | 11                     | 28                   |
|          | 35   | ,00    | .                                           | .          | 11                     | 27                   |
|          | 36   | ,00    | .                                           | .          | 11                     | 26                   |
|          | 37   | ,00    | .                                           | .          | 11                     | 25                   |
|          | 38   | ,00    | .                                           | .          | 11                     | 24                   |
|          | 39   | ,00    | .                                           | .          | 11                     | 23                   |
|          | 40   | ,00    | .                                           | .          | 11                     | 22                   |
|          | 41   | ,00    | .                                           | .          | 11                     | 21                   |
|          | 42   | ,00    | .                                           | .          | 11                     | 20                   |
|          | 43   | ,00    | .                                           | .          | 11                     | 19                   |
|          | 44   | ,00    | .                                           | .          | 11                     | 18                   |
|          | 45   | ,00    | .                                           | .          | 11                     | 17                   |
|          | 46   | ,00    | .                                           | .          | 11                     | 16                   |
|          | 47   | ,00    | .                                           | .          | 11                     | 15                   |
|          | 48   | ,00    | .                                           | .          | 11                     | 14                   |
|          | 49   | ,00    | .                                           | .          | 11                     | 13                   |

Survival Table

| Dialysis | Time   | Status | Cumulative Proportion Surviving at the Time |            | N of Cumulative Events | N of Remaining Cases |
|----------|--------|--------|---------------------------------------------|------------|------------------------|----------------------|
|          |        |        | Estimate                                    | Std. Error |                        |                      |
| 50       | 30,000 | ,00    | .                                           | .          | 11                     | 12                   |
| 51       | 30,000 | ,00    | .                                           | .          | 11                     | 11                   |
| 52       | 30,000 | ,00    | .                                           | .          | 11                     | 10                   |
| 53       | 30,000 | ,00    | .                                           | .          | 11                     | 9                    |
| 54       | 30,000 | ,00    | .                                           | .          | 11                     | 8                    |
| 55       | 30,000 | ,00    | .                                           | .          | 11                     | 7                    |
| 56       | 30,000 | ,00    | .                                           | .          | 11                     | 6                    |
| 57       | 30,000 | ,00    | .                                           | .          | 11                     | 5                    |
| 58       | 30,000 | ,00    | .                                           | .          | 11                     | 4                    |
| 59       | 30,000 | ,00    | .                                           | .          | 11                     | 3                    |
| 60       | 30,000 | ,00    | .                                           | .          | 11                     | 2                    |
| 61       | 30,000 | ,00    | .                                           | .          | 11                     | 1                    |
| 62       | 30,000 | ,00    | .                                           | .          | 11                     | 0                    |

Means and Medians for Survival Time

| Dialysis | Mean <sup>a</sup> |            |                         |             | Median   |            |                         |             |
|----------|-------------------|------------|-------------------------|-------------|----------|------------|-------------------------|-------------|
|          | Estimate          | Std. Error | 95% Confidence Interval |             | Estimate | Std. Error | 95% Confidence Interval |             |
|          |                   |            | Lower Bound             | Upper Bound |          |            | Lower Bound             | Upper Bound |
| ,0       | 27,000            | ,933       | 25,171                  | 28,829      | .        | .          | .                       | .           |
| Overall  | 27,000            | ,933       | 25,171                  | 28,829      | .        | .          | .                       | .           |

a. Estimation is limited to the largest survival time if it is censored.

Survival Function

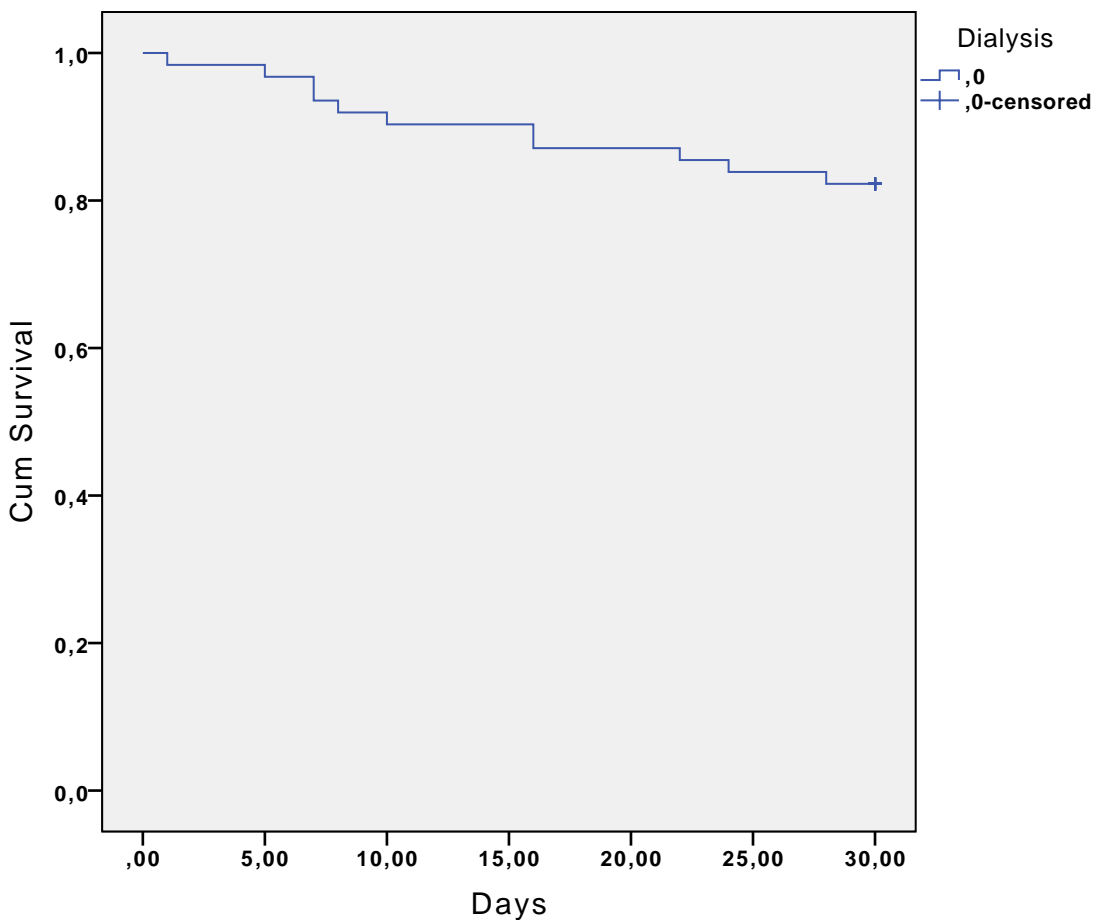

# HIV (0=NO, 1=YES)

## Warnings

No comparison analysis is performed because the factor variable has only one value for every stratum.

## Case Processing Summary

| HIV     | Total N | N of Events | Censored |         |
|---------|---------|-------------|----------|---------|
|         |         |             | N        | Percent |
| ,0      | 62      | 11          | 51       | 82,3%   |
| Overall | 62      | 11          | 51       | 82,3%   |

## Survival Table

| HIV | Time | Status | Cumulative Proportion Surviving at the Time |            | N of Cumulative Events | N of Remaining Cases |
|-----|------|--------|---------------------------------------------|------------|------------------------|----------------------|
|     |      |        | Estimate                                    | Std. Error |                        |                      |
| ,0  | 1    | 1,00   | ,984                                        | ,016       | 1                      | 61                   |
|     | 2    | 1,00   | ,968                                        | ,022       | 2                      | 60                   |
|     | 3    | 1,00   | .                                           | .          | 3                      | 59                   |
|     | 4    | 1,00   | ,935                                        | ,031       | 4                      | 58                   |
|     | 5    | 1,00   | ,919                                        | ,035       | 5                      | 57                   |
|     | 6    | 1,00   | ,903                                        | ,038       | 6                      | 56                   |
|     | 7    | 1,00   | .                                           | .          | 7                      | 55                   |
|     | 8    | 1,00   | ,871                                        | ,043       | 8                      | 54                   |
|     | 9    | 1,00   | ,855                                        | ,045       | 9                      | 53                   |
|     | 10   | 1,00   | ,839                                        | ,047       | 10                     | 52                   |
|     | 11   | 1,00   | ,823                                        | ,049       | 11                     | 51                   |
|     | 12   | ,00    | .                                           | .          | 11                     | 50                   |
|     | 13   | ,00    | .                                           | .          | 11                     | 49                   |
|     | 14   | ,00    | .                                           | .          | 11                     | 48                   |
|     | 15   | ,00    | .                                           | .          | 11                     | 47                   |
|     | 16   | ,00    | .                                           | .          | 11                     | 46                   |
|     | 17   | ,00    | .                                           | .          | 11                     | 45                   |
|     | 18   | ,00    | .                                           | .          | 11                     | 44                   |
|     | 19   | ,00    | .                                           | .          | 11                     | 43                   |
|     | 20   | ,00    | .                                           | .          | 11                     | 42                   |
|     | 21   | ,00    | .                                           | .          | 11                     | 41                   |
|     | 22   | ,00    | .                                           | .          | 11                     | 40                   |
|     | 23   | ,00    | .                                           | .          | 11                     | 39                   |
|     | 24   | ,00    | .                                           | .          | 11                     | 38                   |
|     | 25   | ,00    | .                                           | .          | 11                     | 37                   |
|     | 26   | ,00    | .                                           | .          | 11                     | 36                   |
|     | 27   | ,00    | .                                           | .          | 11                     | 35                   |
|     | 28   | ,00    | .                                           | .          | 11                     | 34                   |
|     | 29   | ,00    | .                                           | .          | 11                     | 33                   |
|     | 30   | ,00    | .                                           | .          | 11                     | 32                   |
|     | 31   | ,00    | .                                           | .          | 11                     | 31                   |
|     | 32   | ,00    | .                                           | .          | 11                     | 30                   |
|     | 33   | ,00    | .                                           | .          | 11                     | 29                   |
|     | 34   | ,00    | .                                           | .          | 11                     | 28                   |
|     | 35   | ,00    | .                                           | .          | 11                     | 27                   |
|     | 36   | ,00    | .                                           | .          | 11                     | 26                   |

Survival Table

| HIV | Time   | Status | Cumulative Proportion Surviving at the Time |            | N of Cumulative Events | N of Remaining Cases |
|-----|--------|--------|---------------------------------------------|------------|------------------------|----------------------|
|     |        |        | Estimate                                    | Std. Error |                        |                      |
| 37  | 30,000 | ,00    | .                                           | .          | 11                     | 25                   |
| 38  | 30,000 | ,00    | .                                           | .          | 11                     | 24                   |
| 39  | 30,000 | ,00    | .                                           | .          | 11                     | 23                   |
| 40  | 30,000 | ,00    | .                                           | .          | 11                     | 22                   |
| 41  | 30,000 | ,00    | .                                           | .          | 11                     | 21                   |
| 42  | 30,000 | ,00    | .                                           | .          | 11                     | 20                   |
| 43  | 30,000 | ,00    | .                                           | .          | 11                     | 19                   |
| 44  | 30,000 | ,00    | .                                           | .          | 11                     | 18                   |
| 45  | 30,000 | ,00    | .                                           | .          | 11                     | 17                   |
| 46  | 30,000 | ,00    | .                                           | .          | 11                     | 16                   |
| 47  | 30,000 | ,00    | .                                           | .          | 11                     | 15                   |
| 48  | 30,000 | ,00    | .                                           | .          | 11                     | 14                   |
| 49  | 30,000 | ,00    | .                                           | .          | 11                     | 13                   |
| 50  | 30,000 | ,00    | .                                           | .          | 11                     | 12                   |
| 51  | 30,000 | ,00    | .                                           | .          | 11                     | 11                   |
| 52  | 30,000 | ,00    | .                                           | .          | 11                     | 10                   |
| 53  | 30,000 | ,00    | .                                           | .          | 11                     | 9                    |
| 54  | 30,000 | ,00    | .                                           | .          | 11                     | 8                    |
| 55  | 30,000 | ,00    | .                                           | .          | 11                     | 7                    |
| 56  | 30,000 | ,00    | .                                           | .          | 11                     | 6                    |
| 57  | 30,000 | ,00    | .                                           | .          | 11                     | 5                    |
| 58  | 30,000 | ,00    | .                                           | .          | 11                     | 4                    |
| 59  | 30,000 | ,00    | .                                           | .          | 11                     | 3                    |
| 60  | 30,000 | ,00    | .                                           | .          | 11                     | 2                    |
| 61  | 30,000 | ,00    | .                                           | .          | 11                     | 1                    |
| 62  | 30,000 | ,00    | .                                           | .          | 11                     | 0                    |

Means and Medians for Survival Time

| HIV     | Mean <sup>a</sup> |            |                         |             | Median   |            |                         |             |
|---------|-------------------|------------|-------------------------|-------------|----------|------------|-------------------------|-------------|
|         | Estimate          | Std. Error | 95% Confidence Interval |             | Estimate | Std. Error | 95% Confidence Interval |             |
|         |                   |            | Lower Bound             | Upper Bound |          |            | Lower Bound             | Upper Bound |
| ,0      | 27,000            | ,933       | 25,171                  | 28,829      | .        | .          | .                       | .           |
| Overall | 27,000            | ,933       | 25,171                  | 28,829      | .        | .          | .                       | .           |

a. Estimation is limited to the largest survival time if it is censored.

### Survival Function

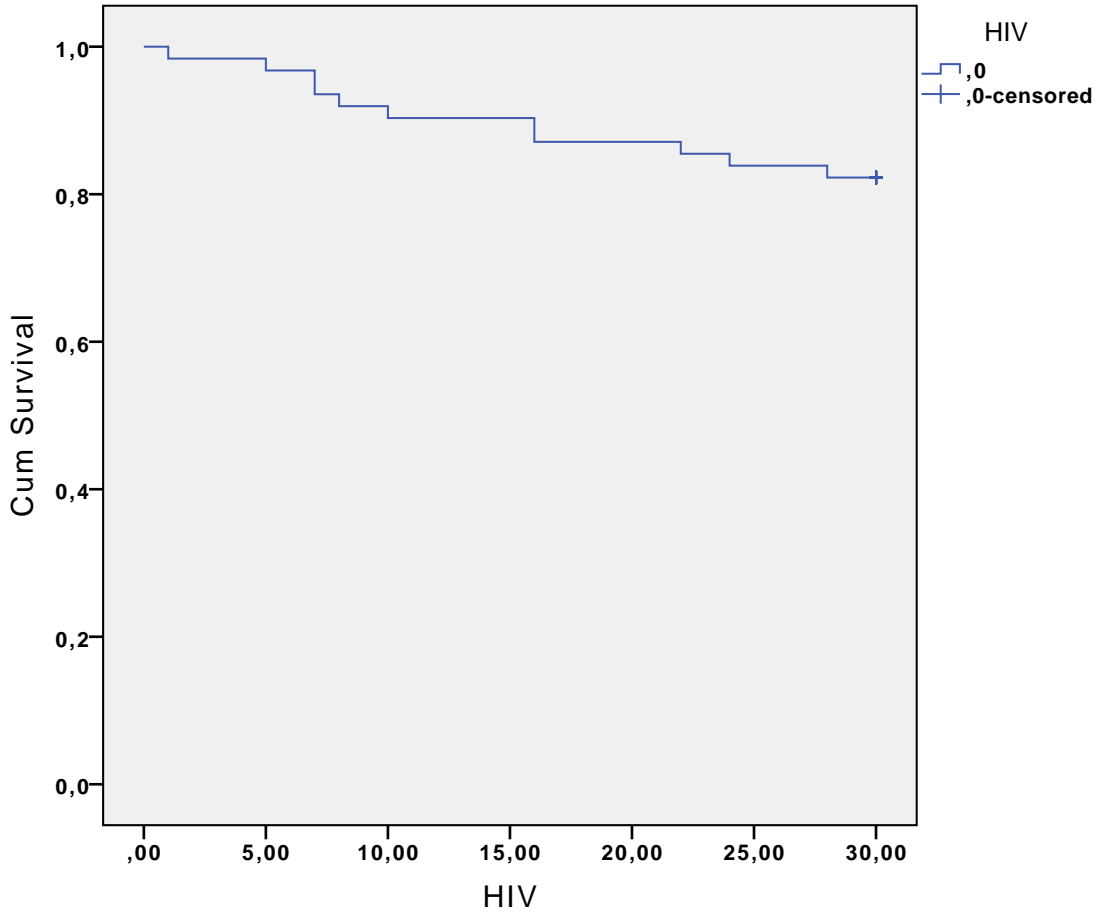

### AIDS (0=NO, 1=YES)

#### Warnings

No comparison analysis is performed because the factor variable has only one value for every stratum.

#### Case Processing Summary

| AIDS    | Total N | N of Events | Censored |         |
|---------|---------|-------------|----------|---------|
|         |         |             | N        | Percent |
| ,0      | 62      | 11          | 51       | 82,3%   |
| Overall | 62      | 11          | 51       | 82,3%   |

Survival Table

| AIDS | Time | Status | Cumulative Proportion Surviving at the Time |            | N of Cumulative Events | N of Remaining Cases |
|------|------|--------|---------------------------------------------|------------|------------------------|----------------------|
|      |      |        | Estimate                                    | Std. Error |                        |                      |
| ,0   | 1    | 1,00   | ,984                                        | ,016       | 1                      | 61                   |
|      | 2    | 1,00   | ,968                                        | ,022       | 2                      | 60                   |
|      | 3    | 1,00   | .                                           | .          | 3                      | 59                   |
|      | 4    | 1,00   | ,935                                        | ,031       | 4                      | 58                   |
|      | 5    | 1,00   | ,919                                        | ,035       | 5                      | 57                   |
|      | 6    | 1,00   | ,903                                        | ,038       | 6                      | 56                   |
|      | 7    | 1,00   | .                                           | .          | 7                      | 55                   |
|      | 8    | 1,00   | ,871                                        | ,043       | 8                      | 54                   |
|      | 9    | 1,00   | ,855                                        | ,045       | 9                      | 53                   |
|      | 10   | 1,00   | ,839                                        | ,047       | 10                     | 52                   |
|      | 11   | 1,00   | ,823                                        | ,049       | 11                     | 51                   |
|      | 12   | ,00    | .                                           | .          | 11                     | 50                   |
|      | 13   | ,00    | .                                           | .          | 11                     | 49                   |
|      | 14   | ,00    | .                                           | .          | 11                     | 48                   |
|      | 15   | ,00    | .                                           | .          | 11                     | 47                   |
|      | 16   | ,00    | .                                           | .          | 11                     | 46                   |
|      | 17   | ,00    | .                                           | .          | 11                     | 45                   |
|      | 18   | ,00    | .                                           | .          | 11                     | 44                   |
|      | 19   | ,00    | .                                           | .          | 11                     | 43                   |
|      | 20   | ,00    | .                                           | .          | 11                     | 42                   |
|      | 21   | ,00    | .                                           | .          | 11                     | 41                   |
|      | 22   | ,00    | .                                           | .          | 11                     | 40                   |
|      | 23   | ,00    | .                                           | .          | 11                     | 39                   |
|      | 24   | ,00    | .                                           | .          | 11                     | 38                   |
|      | 25   | ,00    | .                                           | .          | 11                     | 37                   |
|      | 26   | ,00    | .                                           | .          | 11                     | 36                   |
|      | 27   | ,00    | .                                           | .          | 11                     | 35                   |
|      | 28   | ,00    | .                                           | .          | 11                     | 34                   |
|      | 29   | ,00    | .                                           | .          | 11                     | 33                   |
|      | 30   | ,00    | .                                           | .          | 11                     | 32                   |
|      | 31   | ,00    | .                                           | .          | 11                     | 31                   |
|      | 32   | ,00    | .                                           | .          | 11                     | 30                   |
|      | 33   | ,00    | .                                           | .          | 11                     | 29                   |
|      | 34   | ,00    | .                                           | .          | 11                     | 28                   |
|      | 35   | ,00    | .                                           | .          | 11                     | 27                   |
|      | 36   | ,00    | .                                           | .          | 11                     | 26                   |
|      | 37   | ,00    | .                                           | .          | 11                     | 25                   |
|      | 38   | ,00    | .                                           | .          | 11                     | 24                   |
|      | 39   | ,00    | .                                           | .          | 11                     | 23                   |
|      | 40   | ,00    | .                                           | .          | 11                     | 22                   |
|      | 41   | ,00    | .                                           | .          | 11                     | 21                   |
|      | 42   | ,00    | .                                           | .          | 11                     | 20                   |
|      | 43   | ,00    | .                                           | .          | 11                     | 19                   |
|      | 44   | ,00    | .                                           | .          | 11                     | 18                   |
|      | 45   | ,00    | .                                           | .          | 11                     | 17                   |
|      | 46   | ,00    | .                                           | .          | 11                     | 16                   |
|      | 47   | ,00    | .                                           | .          | 11                     | 15                   |
|      | 48   | ,00    | .                                           | .          | 11                     | 14                   |
|      | 49   | ,00    | .                                           | .          | 11                     | 13                   |

Survival Table

| AIDS | Time   | Status | Cumulative Proportion Surviving at the Time |            | N of Cumulative Events | N of Remaining Cases |
|------|--------|--------|---------------------------------------------|------------|------------------------|----------------------|
|      |        |        | Estimate                                    | Std. Error |                        |                      |
| 50   | 30,000 | ,00    | .                                           | .          | 11                     | 12                   |
| 51   | 30,000 | ,00    | .                                           | .          | 11                     | 11                   |
| 52   | 30,000 | ,00    | .                                           | .          | 11                     | 10                   |
| 53   | 30,000 | ,00    | .                                           | .          | 11                     | 9                    |
| 54   | 30,000 | ,00    | .                                           | .          | 11                     | 8                    |
| 55   | 30,000 | ,00    | .                                           | .          | 11                     | 7                    |
| 56   | 30,000 | ,00    | .                                           | .          | 11                     | 6                    |
| 57   | 30,000 | ,00    | .                                           | .          | 11                     | 5                    |
| 58   | 30,000 | ,00    | .                                           | .          | 11                     | 4                    |
| 59   | 30,000 | ,00    | .                                           | .          | 11                     | 3                    |
| 60   | 30,000 | ,00    | .                                           | .          | 11                     | 2                    |
| 61   | 30,000 | ,00    | .                                           | .          | 11                     | 1                    |
| 62   | 30,000 | ,00    | .                                           | .          | 11                     | 0                    |

Means and Medians for Survival Time

| AIDS    | Mean <sup>a</sup> |            |                         |             | Median   |            |                         |             |
|---------|-------------------|------------|-------------------------|-------------|----------|------------|-------------------------|-------------|
|         | Estimate          | Std. Error | 95% Confidence Interval |             | Estimate | Std. Error | 95% Confidence Interval |             |
|         |                   |            | Lower Bound             | Upper Bound |          |            | Lower Bound             | Upper Bound |
| ,0      | 27,000            | ,933       | 25,171                  | 28,829      | .        | .          | .                       | .           |
| Overall | 27,000            | ,933       | 25,171                  | 28,829      | .        | .          | .                       | .           |

a. Estimation is limited to the largest survival time if it is censored.

Survival Function

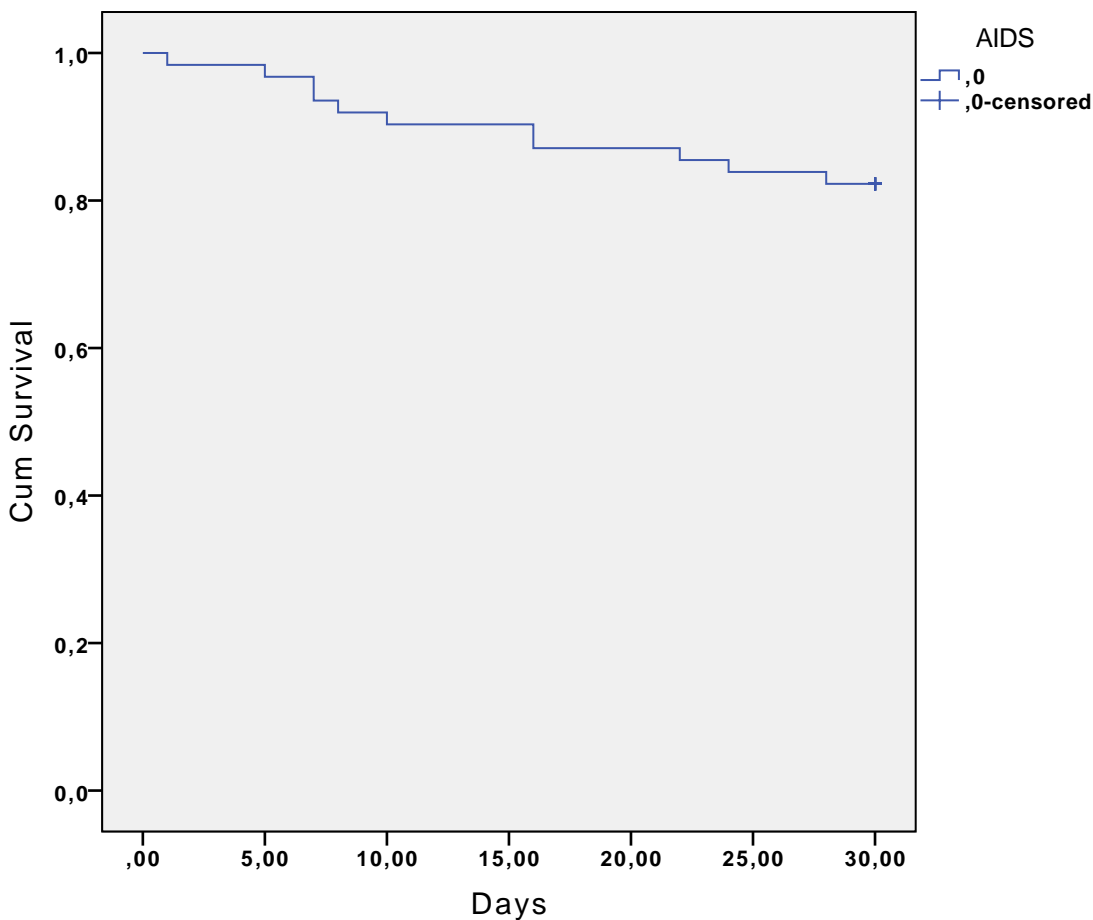



# IMMUNOSUPPRESSION (NEUTROPENIA/SOLID ORGAN TRANSPLANT/IMMUNOSUPPRESSIVE TREATMENT) (0=NO, 1=YES)

Case Processing Summary

| Immunosuppression (Neutropenia/Solid Organ Transplant/Immunosuppressive Treatment) | Total N | N of Events | Censored |         |
|------------------------------------------------------------------------------------|---------|-------------|----------|---------|
|                                                                                    |         |             | N        | Percent |
| ,00                                                                                | 49      | 7           | 42       | 85,7%   |
| 1,00                                                                               | 13      | 4           | 9        | 69,2%   |
| Overall                                                                            | 62      | 11          | 51       | 82,3%   |

Survival Table

| Immunosuppression (Neutropenia/Solid Organ Transplant/Immunosuppressive Treatment) | Time | Status | Cumulative Proportion Surviving at the Time |            | N of Cumulative Events |   |
|------------------------------------------------------------------------------------|------|--------|---------------------------------------------|------------|------------------------|---|
|                                                                                    |      |        | Estimate                                    | Std. Error |                        |   |
| ,00                                                                                | 1    | 7,000  | 1,00                                        | ,980       | ,020                   | 1 |
|                                                                                    | 2    | 8,000  | 1,00                                        | ,959       | ,028                   | 2 |
|                                                                                    | 3    | 10,000 | 1,00                                        | ,939       | ,034                   | 3 |
|                                                                                    | 4    | 16,000 | 1,00                                        | .          | .                      | 4 |
|                                                                                    | 5    | 16,000 | 1,00                                        | ,898       | ,043                   | 5 |
|                                                                                    | 6    | 22,000 | 1,00                                        | ,878       | ,047                   | 6 |
|                                                                                    | 7    | 28,000 | 1,00                                        | ,857       | ,050                   | 7 |
|                                                                                    | 8    | 30,000 | ,00                                         | .          | .                      | 7 |
|                                                                                    | 9    | 30,000 | ,00                                         | .          | .                      | 7 |
|                                                                                    | 10   | 30,000 | ,00                                         | .          | .                      | 7 |
|                                                                                    | 11   | 30,000 | ,00                                         | .          | .                      | 7 |
|                                                                                    | 12   | 30,000 | ,00                                         | .          | .                      | 7 |
|                                                                                    | 13   | 30,000 | ,00                                         | .          | .                      | 7 |
|                                                                                    | 14   | 30,000 | ,00                                         | .          | .                      | 7 |
|                                                                                    | 15   | 30,000 | ,00                                         | .          | .                      | 7 |
|                                                                                    | 16   | 30,000 | ,00                                         | .          | .                      | 7 |
|                                                                                    | 17   | 30,000 | ,00                                         | .          | .                      | 7 |
|                                                                                    | 18   | 30,000 | ,00                                         | .          | .                      | 7 |
|                                                                                    | 19   | 30,000 | ,00                                         | .          | .                      | 7 |
|                                                                                    | 20   | 30,000 | ,00                                         | .          | .                      | 7 |
|                                                                                    | 21   | 30,000 | ,00                                         | .          | .                      | 7 |
|                                                                                    | 22   | 30,000 | ,00                                         | .          | .                      | 7 |
|                                                                                    | 23   | 30,000 | ,00                                         | .          | .                      | 7 |
|                                                                                    | 24   | 30,000 | ,00                                         | .          | .                      | 7 |
|                                                                                    | 25   | 30,000 | ,00                                         | .          | .                      | 7 |
|                                                                                    | 26   | 30,000 | ,00                                         | .          | .                      | 7 |
|                                                                                    | 27   | 30,000 | ,00                                         | .          | .                      | 7 |
|                                                                                    | 28   | 30,000 | ,00                                         | .          | .                      | 7 |
|                                                                                    | 29   | 30,000 | ,00                                         | .          | .                      | 7 |
|                                                                                    | 30   | 30,000 | ,00                                         | .          | .                      | 7 |
|                                                                                    | 31   | 30,000 | ,00                                         | .          | .                      | 7 |
|                                                                                    | 32   | 30,000 | ,00                                         | .          | .                      | 7 |
|                                                                                    | 33   | 30,000 | ,00                                         | .          | .                      | 7 |
|                                                                                    | 34   | 30,000 | ,00                                         | .          | .                      | 7 |
|                                                                                    | 35   | 30,000 | ,00                                         | .          | .                      | 7 |
|                                                                                    | 36   | 30,000 | ,00                                         | .          | .                      | 7 |

Survival Table

| Immunosuppression (Neutropenia/Solid Organ Transplant/Immunosuppressive Treatment) | N of Remaining Cases |
|------------------------------------------------------------------------------------|----------------------|
| ,00                                                                                | 48                   |
| 1                                                                                  | 47                   |
| 2                                                                                  | 46                   |
| 3                                                                                  | 45                   |
| 4                                                                                  | 44                   |
| 5                                                                                  | 43                   |
| 6                                                                                  | 42                   |
| 7                                                                                  | 41                   |
| 8                                                                                  | 40                   |
| 9                                                                                  | 39                   |
| 10                                                                                 | 38                   |
| 11                                                                                 | 37                   |
| 12                                                                                 | 36                   |
| 13                                                                                 | 35                   |
| 14                                                                                 | 34                   |
| 15                                                                                 | 33                   |
| 16                                                                                 | 32                   |
| 17                                                                                 | 31                   |
| 18                                                                                 | 30                   |
| 19                                                                                 | 29                   |
| 20                                                                                 | 28                   |
| 21                                                                                 | 27                   |
| 22                                                                                 | 26                   |
| 23                                                                                 | 25                   |
| 24                                                                                 | 24                   |
| 25                                                                                 | 23                   |
| 26                                                                                 | 22                   |
| 27                                                                                 | 21                   |
| 28                                                                                 | 20                   |
| 29                                                                                 | 19                   |
| 30                                                                                 | 18                   |
| 31                                                                                 | 17                   |
| 32                                                                                 | 16                   |
| 33                                                                                 | 15                   |
| 34                                                                                 | 14                   |
| 35                                                                                 | 13                   |
| 36                                                                                 |                      |

Survival Table

| Immunosuppression (Neutropenia/Solid Organ Transplant/Immunosuppressive Treatment) | Time | Status | Cumulative Proportion Surviving at the Time |            | N of Cumulative Events |   |
|------------------------------------------------------------------------------------|------|--------|---------------------------------------------|------------|------------------------|---|
|                                                                                    |      |        | Estimate                                    | Std. Error |                        |   |
| 1,00                                                                               | 37   | 30,000 | ,00                                         | .          | .                      | 7 |
|                                                                                    | 38   | 30,000 | ,00                                         | .          | .                      | 7 |
|                                                                                    | 39   | 30,000 | ,00                                         | .          | .                      | 7 |
|                                                                                    | 40   | 30,000 | ,00                                         | .          | .                      | 7 |
|                                                                                    | 41   | 30,000 | ,00                                         | .          | .                      | 7 |
|                                                                                    | 42   | 30,000 | ,00                                         | .          | .                      | 7 |
|                                                                                    | 43   | 30,000 | ,00                                         | .          | .                      | 7 |
|                                                                                    | 44   | 30,000 | ,00                                         | .          | .                      | 7 |
|                                                                                    | 45   | 30,000 | ,00                                         | .          | .                      | 7 |
|                                                                                    | 46   | 30,000 | ,00                                         | .          | .                      | 7 |
|                                                                                    | 47   | 30,000 | ,00                                         | .          | .                      | 7 |
|                                                                                    | 48   | 30,000 | ,00                                         | .          | .                      | 7 |
|                                                                                    | 49   | 30,000 | ,00                                         | .          | .                      | 7 |
|                                                                                    | 1    | 1,000  | 1,00                                        | ,923       | ,074                   | 1 |
|                                                                                    | 2    | 5,000  | 1,00                                        | ,846       | ,100                   | 2 |
|                                                                                    | 3    | 7,000  | 1,00                                        | ,769       | ,117                   | 3 |
|                                                                                    | 4    | 24,000 | 1,00                                        | ,692       | ,128                   | 4 |
|                                                                                    | 5    | 30,000 | ,00                                         | .          | .                      | 4 |
|                                                                                    | 6    | 30,000 | ,00                                         | .          | .                      | 4 |
|                                                                                    | 7    | 30,000 | ,00                                         | .          | .                      | 4 |
|                                                                                    | 8    | 30,000 | ,00                                         | .          | .                      | 4 |
|                                                                                    | 9    | 30,000 | ,00                                         | .          | .                      | 4 |
|                                                                                    | 10   | 30,000 | ,00                                         | .          | .                      | 4 |
|                                                                                    | 11   | 30,000 | ,00                                         | .          | .                      | 4 |
|                                                                                    | 12   | 30,000 | ,00                                         | .          | .                      | 4 |
|                                                                                    | 13   | 30,000 | ,00                                         | .          | .                      | 4 |

Survival Table

| Immunosuppression (Neutropenia/Solid Organ Transplant/Immunosuppressive Treatment) | N of Remaining Cases |
|------------------------------------------------------------------------------------|----------------------|
| 37                                                                                 | 12                   |
| 38                                                                                 | 11                   |
| 39                                                                                 | 10                   |
| 40                                                                                 | 9                    |
| 41                                                                                 | 8                    |
| 42                                                                                 | 7                    |
| 43                                                                                 | 6                    |
| 44                                                                                 | 5                    |
| 45                                                                                 | 4                    |
| 46                                                                                 | 3                    |
| 47                                                                                 | 2                    |
| 48                                                                                 | 1                    |
| 49                                                                                 | 0                    |
| 1,00                                                                               | 12                   |
| 2                                                                                  | 11                   |
| 3                                                                                  | 10                   |
| 4                                                                                  | 9                    |
| 5                                                                                  | 8                    |
| 6                                                                                  | 7                    |
| 7                                                                                  | 6                    |
| 8                                                                                  | 5                    |
| 9                                                                                  | 4                    |
| 10                                                                                 | 3                    |
| 11                                                                                 | 2                    |
| 12                                                                                 | 1                    |
| 13                                                                                 | 0                    |

Means and Medians for Survival Time

| Immunosuppression (Neutropenia/Solid Organ Transplant/Immunosuppressive Treatment) | Mean <sup>a</sup> |            |                         |             | Median   |            |             |
|------------------------------------------------------------------------------------|-------------------|------------|-------------------------|-------------|----------|------------|-------------|
|                                                                                    | Estimate          | Std. Error | 95% Confidence Interval |             | Estimate | Std. Error | 95% ...     |
|                                                                                    |                   |            | Lower Bound             | Upper Bound |          |            | Lower Bound |
| ,00                                                                                | 27,898            | ,831       | 26,270                  | 29,526      | .        | .          | .           |
| 1,00                                                                               | 23,615            | 2,980      | 17,774                  | 29,457      | .        | .          | .           |
| Overall                                                                            | 27,000            | ,933       | 25,171                  | 28,829      | .        | .          | .           |

Means and Medians for Survival Time

| Immunosuppression (Neutropenia/Solid Organ Transplant/Immunosuppressive Treatment) | Median      |
|------------------------------------------------------------------------------------|-------------|
|                                                                                    | 95% ...     |
|                                                                                    | Upper Bound |
| ,00                                                                                | .           |
| 1,00                                                                               | .           |
| Overall                                                                            | .           |

a. Estimation is limited to the largest survival time if it is censored.

Overall Comparisons

|                       | Chi-Square | df | Sig. |
|-----------------------|------------|----|------|
| Log Rank (Mantel-Cox) | 2,378      | 1  | ,123 |

Test of equality of survival distributions for the different levels of Immunosuppression (Neutropenia/Solid Organ Transplant/Immunosuppressive Treatment)

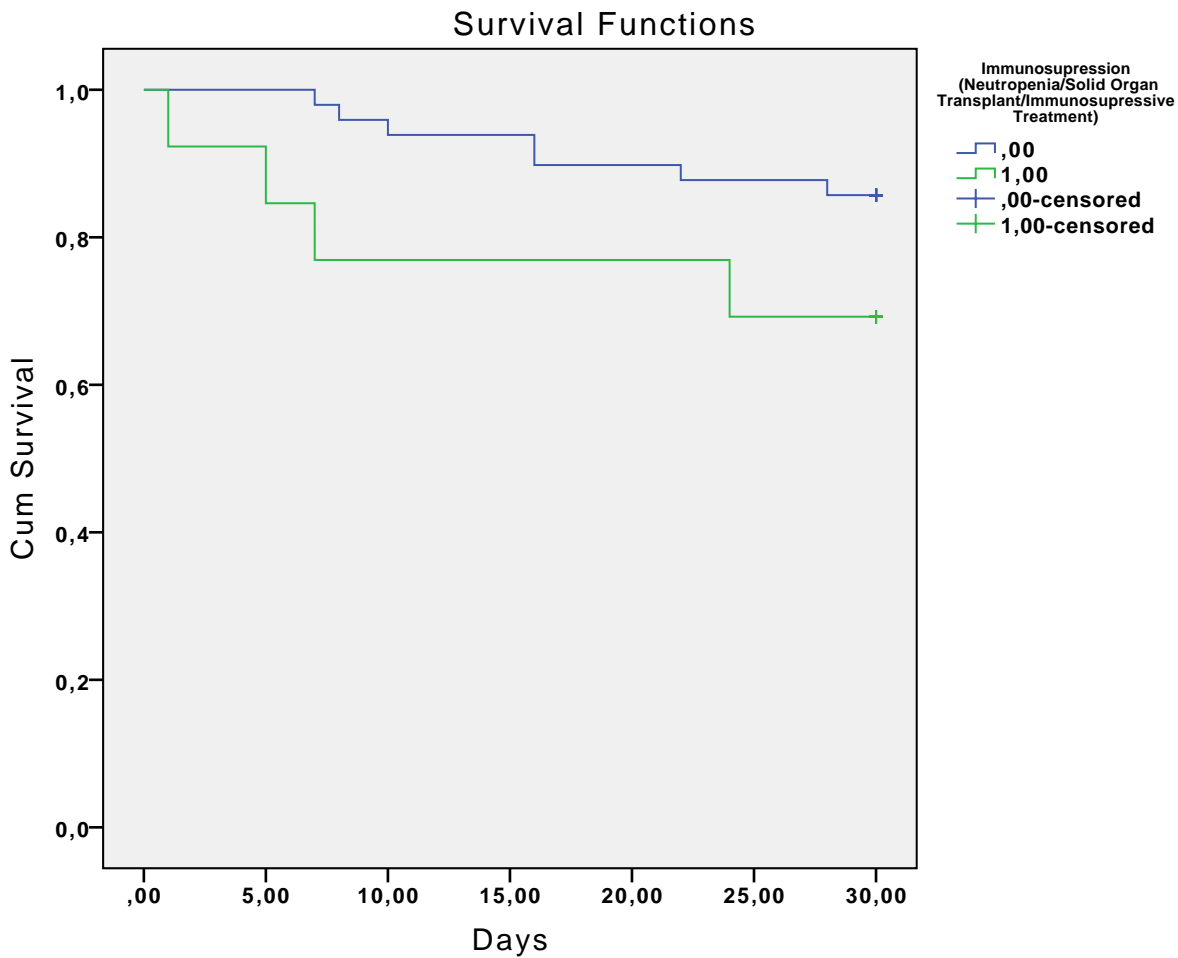

**PREVIOUS 30 DAYS SURGERY (0=NO, 1=YES)**

Warnings

No statistics are computed because all cases are censored.

Case Processing Summary

| Previous 30 Days Surgery | Total N   | N of Events | Censored  |              |
|--------------------------|-----------|-------------|-----------|--------------|
|                          |           |             | N         | Percent      |
| ,0                       | 46        | 11          | 35        | 76,1%        |
| 1,0                      | 14        | 0           | 14        | 100,0%       |
| <b>Overall</b>           | <b>60</b> | <b>11</b>   | <b>49</b> | <b>81,7%</b> |

Survival Table

| Previous 30 Days Surgery | Time | Status | Cumulative Proportion Surviving at the Time |            | N of Cumulative Events | N of Remaining Cases |
|--------------------------|------|--------|---------------------------------------------|------------|------------------------|----------------------|
|                          |      |        | Estimate                                    | Std. Error |                        |                      |
| ,0                       | 1    | 1,00   | ,978                                        | ,022       | 1                      | 45                   |
|                          | 2    | 1,00   | ,957                                        | ,030       | 2                      | 44                   |
|                          | 3    | 1,00   | .                                           | .          | 3                      | 43                   |
|                          | 4    | 1,00   | ,913                                        | ,042       | 4                      | 42                   |
|                          | 5    | 1,00   | ,891                                        | ,046       | 5                      | 41                   |
|                          | 6    | 1,00   | ,870                                        | ,050       | 6                      | 40                   |
|                          | 7    | 1,00   | .                                           | .          | 7                      | 39                   |
|                          | 8    | 1,00   | ,826                                        | ,056       | 8                      | 38                   |
|                          | 9    | 1,00   | ,804                                        | ,058       | 9                      | 37                   |
|                          | 10   | 1,00   | ,783                                        | ,061       | 10                     | 36                   |
|                          | 11   | 1,00   | ,761                                        | ,063       | 11                     | 35                   |
|                          | 12   | ,00    | .                                           | .          | 11                     | 34                   |
|                          | 13   | ,00    | .                                           | .          | 11                     | 33                   |
|                          | 14   | ,00    | .                                           | .          | 11                     | 32                   |
|                          | 15   | ,00    | .                                           | .          | 11                     | 31                   |
|                          | 16   | ,00    | .                                           | .          | 11                     | 30                   |
|                          | 17   | ,00    | .                                           | .          | 11                     | 29                   |
|                          | 18   | ,00    | .                                           | .          | 11                     | 28                   |
|                          | 19   | ,00    | .                                           | .          | 11                     | 27                   |
|                          | 20   | ,00    | .                                           | .          | 11                     | 26                   |
|                          | 21   | ,00    | .                                           | .          | 11                     | 25                   |
|                          | 22   | ,00    | .                                           | .          | 11                     | 24                   |
|                          | 23   | ,00    | .                                           | .          | 11                     | 23                   |
|                          | 24   | ,00    | .                                           | .          | 11                     | 22                   |
|                          | 25   | ,00    | .                                           | .          | 11                     | 21                   |
|                          | 26   | ,00    | .                                           | .          | 11                     | 20                   |
|                          | 27   | ,00    | .                                           | .          | 11                     | 19                   |
|                          | 28   | ,00    | .                                           | .          | 11                     | 18                   |
|                          | 29   | ,00    | .                                           | .          | 11                     | 17                   |
|                          | 30   | ,00    | .                                           | .          | 11                     | 16                   |
|                          | 31   | ,00    | .                                           | .          | 11                     | 15                   |
|                          | 32   | ,00    | .                                           | .          | 11                     | 14                   |
|                          | 33   | ,00    | .                                           | .          | 11                     | 13                   |
|                          | 34   | ,00    | .                                           | .          | 11                     | 12                   |
|                          | 35   | ,00    | .                                           | .          | 11                     | 11                   |
|                          | 36   | ,00    | .                                           | .          | 11                     | 10                   |
|                          | 37   | ,00    | .                                           | .          | 11                     | 9                    |
|                          | 38   | ,00    | .                                           | .          | 11                     | 8                    |
|                          | 39   | ,00    | .                                           | .          | 11                     | 7                    |
|                          | 40   | ,00    | .                                           | .          | 11                     | 6                    |
|                          | 41   | ,00    | .                                           | .          | 11                     | 5                    |
|                          | 42   | ,00    | .                                           | .          | 11                     | 4                    |
|                          | 43   | ,00    | .                                           | .          | 11                     | 3                    |
|                          | 44   | ,00    | .                                           | .          | 11                     | 2                    |
|                          | 45   | ,00    | .                                           | .          | 11                     | 1                    |
|                          | 46   | ,00    | .                                           | .          | 11                     | 0                    |
| 1,0                      | 1    | ,00    | .                                           | .          | 0                      | 13                   |
|                          | 2    | ,00    | .                                           | .          | 0                      | 12                   |
|                          | 3    | ,00    | .                                           | .          | 0                      | 11                   |

Survival Table

| Previous 30 Days Surgerv | Time   | Status | Cumulative Proportion Surviving at the Time |            | N of Cumulative Events | N of Remaining Cases |
|--------------------------|--------|--------|---------------------------------------------|------------|------------------------|----------------------|
|                          |        |        | Estimate                                    | Std. Error |                        |                      |
| 4                        | 30,000 | ,00    | .                                           | .          | 0                      | 10                   |
| 5                        | 30,000 | ,00    | .                                           | .          | 0                      | 9                    |
| 6                        | 30,000 | ,00    | .                                           | .          | 0                      | 8                    |
| 7                        | 30,000 | ,00    | .                                           | .          | 0                      | 7                    |
| 8                        | 30,000 | ,00    | .                                           | .          | 0                      | 6                    |
| 9                        | 30,000 | ,00    | .                                           | .          | 0                      | 5                    |
| 10                       | 30,000 | ,00    | .                                           | .          | 0                      | 4                    |
| 11                       | 30,000 | ,00    | .                                           | .          | 0                      | 3                    |
| 12                       | 30,000 | ,00    | .                                           | .          | 0                      | 2                    |
| 13                       | 30,000 | ,00    | .                                           | .          | 0                      | 1                    |

Overall Comparisons

|                       | Chi-Square | df | Sig. |
|-----------------------|------------|----|------|
| Log Rank (Mantel-Cox) | 3,786      | 1  | ,052 |

Test of equality of survival distributions for the different levels of Previous 30 Days Surgery

Survival Functions

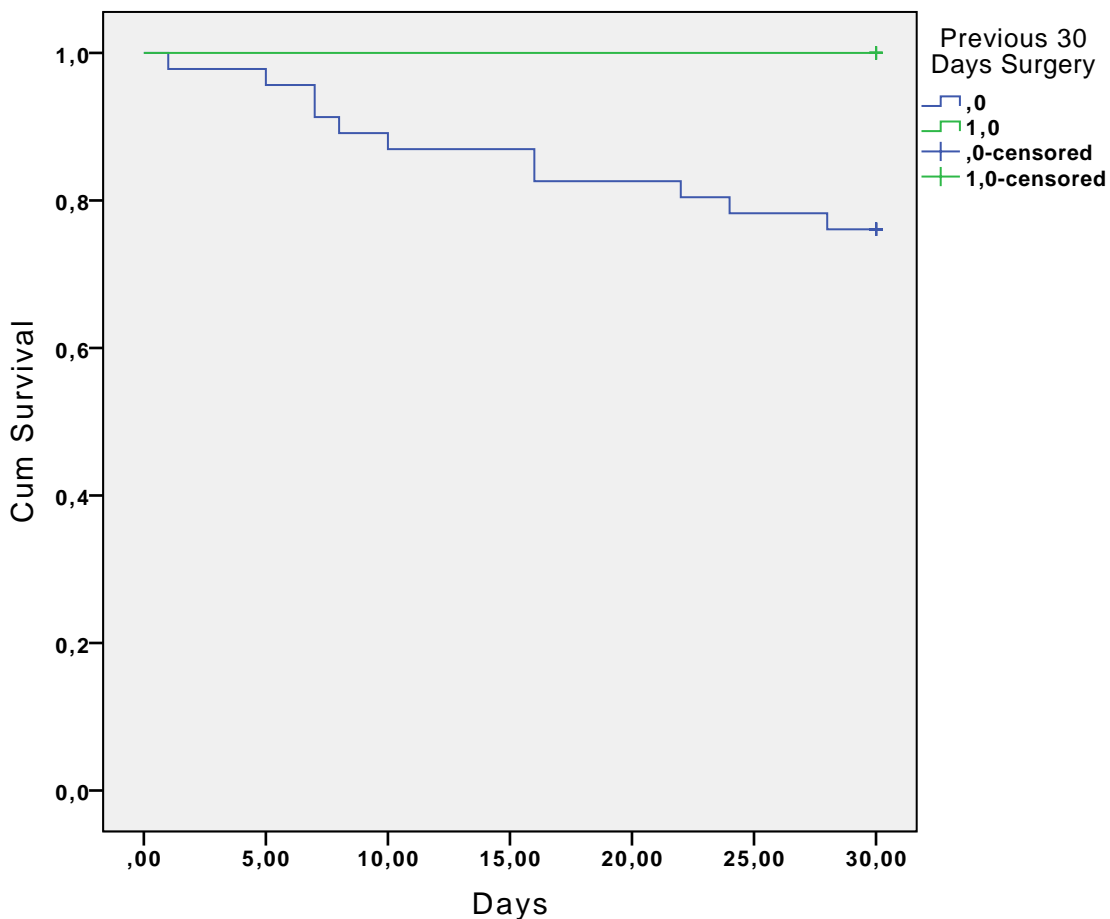

**ANTIBIOTIC TREATMENT IN PREVIOUS 90 DAYS (0=NO, 1=YES)**

**Case Processing Summary**

| Antibiotic Treatment in Previous 90 Days | Total N | N of Events | Censored |         |
|------------------------------------------|---------|-------------|----------|---------|
|                                          |         |             | N        | Percent |
| ,0                                       | 9       | 1           | 8        | 88,9%   |
| 1,0                                      | 50      | 10          | 40       | 80,0%   |
| Overall                                  | 59      | 11          | 48       | 81,4%   |

**Survival Table**

| Antibiotic Treatment in Previous 90 Days | Time | Status | Cumulative Proportion Surviving at the Time |            | N of Cumulative Events |    |
|------------------------------------------|------|--------|---------------------------------------------|------------|------------------------|----|
|                                          |      |        | Estimate                                    | Std. Error |                        |    |
| ,0                                       | 1    | 24,000 | 1,00                                        | ,889       | ,105                   | 1  |
|                                          | 2    | 30,000 | ,00                                         | .          | .                      | 1  |
|                                          | 3    | 30,000 | ,00                                         | .          | .                      | 1  |
|                                          | 4    | 30,000 | ,00                                         | .          | .                      | 1  |
|                                          | 5    | 30,000 | ,00                                         | .          | .                      | 1  |
|                                          | 6    | 30,000 | ,00                                         | .          | .                      | 1  |
|                                          | 7    | 30,000 | ,00                                         | .          | .                      | 1  |
|                                          | 8    | 30,000 | ,00                                         | .          | .                      | 1  |
|                                          | 9    | 30,000 | ,00                                         | .          | .                      | 1  |
| 1,0                                      | 1    | 1,000  | 1,00                                        | ,980       | ,020                   | 1  |
|                                          | 2    | 5,000  | 1,00                                        | ,960       | ,028                   | 2  |
|                                          | 3    | 7,000  | 1,00                                        | .          | .                      | 3  |
|                                          | 4    | 7,000  | 1,00                                        | ,920       | ,038                   | 4  |
|                                          | 5    | 8,000  | 1,00                                        | ,900       | ,042                   | 5  |
|                                          | 6    | 10,000 | 1,00                                        | ,880       | ,046                   | 6  |
|                                          | 7    | 16,000 | 1,00                                        | .          | .                      | 7  |
|                                          | 8    | 16,000 | 1,00                                        | ,840       | ,052                   | 8  |
|                                          | 9    | 22,000 | 1,00                                        | ,820       | ,054                   | 9  |
|                                          | 10   | 28,000 | 1,00                                        | ,800       | ,057                   | 10 |
|                                          | 11   | 30,000 | ,00                                         | .          | .                      | 10 |
|                                          | 12   | 30,000 | ,00                                         | .          | .                      | 10 |
|                                          | 13   | 30,000 | ,00                                         | .          | .                      | 10 |
|                                          | 14   | 30,000 | ,00                                         | .          | .                      | 10 |
|                                          | 15   | 30,000 | ,00                                         | .          | .                      | 10 |
|                                          | 16   | 30,000 | ,00                                         | .          | .                      | 10 |
|                                          | 17   | 30,000 | ,00                                         | .          | .                      | 10 |
|                                          | 18   | 30,000 | ,00                                         | .          | .                      | 10 |
|                                          | 19   | 30,000 | ,00                                         | .          | .                      | 10 |
|                                          | 20   | 30,000 | ,00                                         | .          | .                      | 10 |
|                                          | 21   | 30,000 | ,00                                         | .          | .                      | 10 |
|                                          | 22   | 30,000 | ,00                                         | .          | .                      | 10 |
|                                          | 23   | 30,000 | ,00                                         | .          | .                      | 10 |
|                                          | 24   | 30,000 | ,00                                         | .          | .                      | 10 |
|                                          | 25   | 30,000 | ,00                                         | .          | .                      | 10 |
|                                          | 26   | 30,000 | ,00                                         | .          | .                      | 10 |
|                                          | 27   | 30,000 | ,00                                         | .          | .                      | 10 |
|                                          | 28   | 30,000 | ,00                                         | .          | .                      | 10 |
|                                          | 29   | 30,000 | ,00                                         | .          | .                      | 10 |
|                                          | 30   | 30,000 | ,00                                         | .          | .                      | 10 |
|                                          | 31   | 30,000 | ,00                                         | .          | .                      | 10 |
|                                          | 32   | 30,000 | ,00                                         | .          | .                      | 10 |
|                                          | 33   | 30,000 | ,00                                         | .          | .                      | 10 |



Survival Table

| Antibiotic Treatment in Previous 90 Days |    | N of Remaining Cases |
|------------------------------------------|----|----------------------|
| ,0                                       | 1  | 8                    |
|                                          | 2  | 7                    |
|                                          | 3  | 6                    |
|                                          | 4  | 5                    |
|                                          | 5  | 4                    |
|                                          | 6  | 3                    |
|                                          | 7  | 2                    |
|                                          | 8  | 1                    |
|                                          | 9  | 0                    |
| 1,0                                      | 1  | 49                   |
|                                          | 2  | 48                   |
|                                          | 3  | 47                   |
|                                          | 4  | 46                   |
|                                          | 5  | 45                   |
|                                          | 6  | 44                   |
|                                          | 7  | 43                   |
|                                          | 8  | 42                   |
|                                          | 9  | 41                   |
|                                          | 10 | 40                   |
|                                          | 11 | 39                   |
|                                          | 12 | 38                   |
|                                          | 13 | 37                   |
|                                          | 14 | 36                   |
|                                          | 15 | 35                   |
|                                          | 16 | 34                   |
|                                          | 17 | 33                   |
|                                          | 18 | 32                   |
|                                          | 19 | 31                   |
|                                          | 20 | 30                   |
|                                          | 21 | 29                   |
|                                          | 22 | 28                   |
|                                          | 23 | 27                   |
|                                          | 24 | 26                   |
|                                          | 25 | 25                   |
| 26                                       | 24 |                      |
| 27                                       | 23 |                      |
| 28                                       | 22 |                      |
| 29                                       | 21 |                      |
| 30                                       | 20 |                      |
| 31                                       | 19 |                      |
| 32                                       | 18 |                      |
| 33                                       | 17 |                      |

Survival Table

| Antibiotic Treatment in Previous 90 Days | Time   | Status | Cumulative Proportion Surviving at the Time |            | N of Cumulative Events |
|------------------------------------------|--------|--------|---------------------------------------------|------------|------------------------|
|                                          |        |        | Estimate                                    | Std. Error |                        |
| 34                                       | 30,000 | ,00    | .                                           | .          | 10                     |
| 35                                       | 30,000 | ,00    | .                                           | .          | 10                     |
| 36                                       | 30,000 | ,00    | .                                           | .          | 10                     |
| 37                                       | 30,000 | ,00    | .                                           | .          | 10                     |
| 38                                       | 30,000 | ,00    | .                                           | .          | 10                     |
| 39                                       | 30,000 | ,00    | .                                           | .          | 10                     |
| 40                                       | 30,000 | ,00    | .                                           | .          | 10                     |
| 41                                       | 30,000 | ,00    | .                                           | .          | 10                     |
| 42                                       | 30,000 | ,00    | .                                           | .          | 10                     |
| 43                                       | 30,000 | ,00    | .                                           | .          | 10                     |
| 44                                       | 30,000 | ,00    | .                                           | .          | 10                     |
| 45                                       | 30,000 | ,00    | .                                           | .          | 10                     |
| 46                                       | 30,000 | ,00    | .                                           | .          | 10                     |
| 47                                       | 30,000 | ,00    | .                                           | .          | 10                     |
| 48                                       | 30,000 | ,00    | .                                           | .          | 10                     |
| 49                                       | 30,000 | ,00    | .                                           | .          | 10                     |
| 50                                       | 30,000 | ,00    | .                                           | .          | 10                     |

Survival Table

| Antibiotic Treatment in Previous 90 Days | N of Remaining Cases |
|------------------------------------------|----------------------|
| 34                                       | 16                   |
| 35                                       | 15                   |
| 36                                       | 14                   |
| 37                                       | 13                   |
| 38                                       | 12                   |
| 39                                       | 11                   |
| 40                                       | 10                   |
| 41                                       | 9                    |
| 42                                       | 8                    |
| 43                                       | 7                    |
| 44                                       | 6                    |
| 45                                       | 5                    |
| 46                                       | 4                    |
| 47                                       | 3                    |
| 48                                       | 2                    |
| 49                                       | 1                    |
| 50                                       | 0                    |

Means and Medians for Survival Time

| Antibiotic Treatment in Previous 90 Days | Mean <sup>a</sup> |            |                         |             | Median   |            |             |
|------------------------------------------|-------------------|------------|-------------------------|-------------|----------|------------|-------------|
|                                          | Estimate          | Std. Error | 95% Confidence Interval |             | Estimate | Std. Error | 95% ...     |
|                                          |                   |            | Lower Bound             | Upper Bound |          |            | Lower Bound |
| ,0                                       | 29,333            | ,629       | 28,101                  | 30,565      | .        | .          | .           |
| 1,0                                      | 26,400            | 1,135      | 24,176                  | 28,624      | .        | .          | .           |
| Overall                                  | 26,847            | ,976       | 24,934                  | 28,761      | .        | .          | .           |

**Means and Medians for Survival Time**

| Antibiotic Treatment in Previous 90 Days | Median      |
|------------------------------------------|-------------|
|                                          | 95% ...     |
|                                          | Upper Bound |
| ,0                                       | .           |
| 1,0                                      | .           |
| Overall                                  | .           |

a. Estimation is limited to the largest survival time if it is censored.

**Overall Comparisons**

|                       | Chi-Square | df | Sig. |
|-----------------------|------------|----|------|
| Log Rank (Mantel-Cox) | ,440       | 1  | ,507 |

Test of equality of survival distributions for the different levels of Antibiotic Treatment in Previous 90 Days

**Survival Functions**

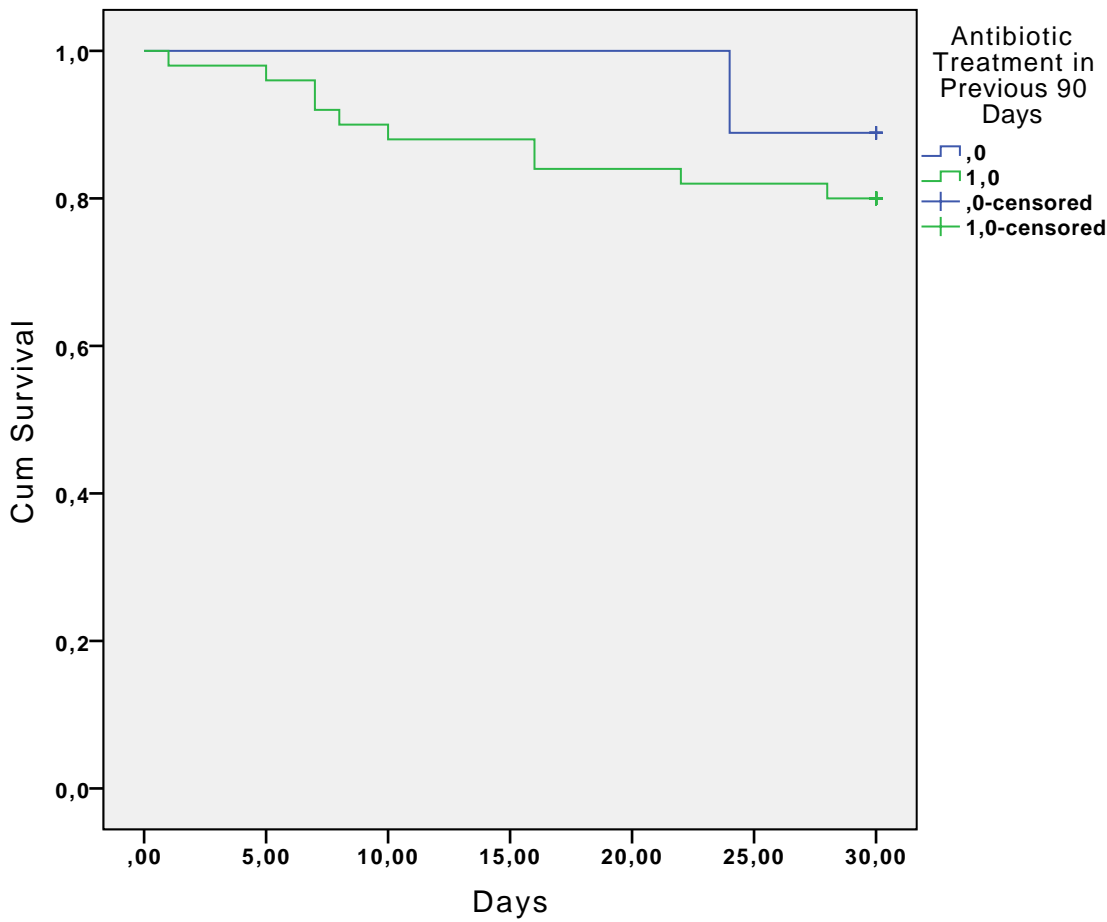

**EMPIRICAL ANTIPSEUDOMONIC TREATMENT (0=NO, 1=YES)**

**Case Processing Summary**

| Empirical Antipseudomonic Treatment | Total N | N of Events | Censored |         |
|-------------------------------------|---------|-------------|----------|---------|
|                                     |         |             | N        | Percent |
| ,00                                 | 38      | 5           | 33       | 86,8%   |
| 1,00                                | 24      | 6           | 18       | 75,0%   |
| Overall                             | 62      | 11          | 51       | 82,3%   |

Survival Table

| Empirical Antipseudomonic Treatment | Time | Status | Cumulative Proportion Surviving at the Time |            | N of Cumulative Events |   |
|-------------------------------------|------|--------|---------------------------------------------|------------|------------------------|---|
|                                     |      |        | Estimate                                    | Std. Error |                        |   |
| ,00                                 | 1    | 5,000  | 1,00                                        | ,974       | ,026                   | 1 |
|                                     | 2    | 8,000  | 1,00                                        | ,947       | ,036                   | 2 |
|                                     | 3    | 16,000 | 1,00                                        | ,921       | ,044                   | 3 |
|                                     | 4    | 24,000 | 1,00                                        | ,895       | ,050                   | 4 |
|                                     | 5    | 28,000 | 1,00                                        | ,868       | ,055                   | 5 |
|                                     | 6    | 30,000 | ,00                                         | .          | .                      | 5 |
|                                     | 7    | 30,000 | ,00                                         | .          | .                      | 5 |
|                                     | 8    | 30,000 | ,00                                         | .          | .                      | 5 |
|                                     | 9    | 30,000 | ,00                                         | .          | .                      | 5 |
|                                     | 10   | 30,000 | ,00                                         | .          | .                      | 5 |
|                                     | 11   | 30,000 | ,00                                         | .          | .                      | 5 |
|                                     | 12   | 30,000 | ,00                                         | .          | .                      | 5 |
|                                     | 13   | 30,000 | ,00                                         | .          | .                      | 5 |
|                                     | 14   | 30,000 | ,00                                         | .          | .                      | 5 |
|                                     | 15   | 30,000 | ,00                                         | .          | .                      | 5 |
|                                     | 16   | 30,000 | ,00                                         | .          | .                      | 5 |
|                                     | 17   | 30,000 | ,00                                         | .          | .                      | 5 |
|                                     | 18   | 30,000 | ,00                                         | .          | .                      | 5 |
|                                     | 19   | 30,000 | ,00                                         | .          | .                      | 5 |
|                                     | 20   | 30,000 | ,00                                         | .          | .                      | 5 |
|                                     | 21   | 30,000 | ,00                                         | .          | .                      | 5 |
|                                     | 22   | 30,000 | ,00                                         | .          | .                      | 5 |
|                                     | 23   | 30,000 | ,00                                         | .          | .                      | 5 |
|                                     | 24   | 30,000 | ,00                                         | .          | .                      | 5 |
|                                     | 25   | 30,000 | ,00                                         | .          | .                      | 5 |
|                                     | 26   | 30,000 | ,00                                         | .          | .                      | 5 |
|                                     | 27   | 30,000 | ,00                                         | .          | .                      | 5 |
|                                     | 28   | 30,000 | ,00                                         | .          | .                      | 5 |
|                                     | 29   | 30,000 | ,00                                         | .          | .                      | 5 |
|                                     | 30   | 30,000 | ,00                                         | .          | .                      | 5 |
|                                     | 31   | 30,000 | ,00                                         | .          | .                      | 5 |
|                                     | 32   | 30,000 | ,00                                         | .          | .                      | 5 |
|                                     | 33   | 30,000 | ,00                                         | .          | .                      | 5 |
|                                     | 34   | 30,000 | ,00                                         | .          | .                      | 5 |
|                                     | 35   | 30,000 | ,00                                         | .          | .                      | 5 |
|                                     | 36   | 30,000 | ,00                                         | .          | .                      | 5 |
|                                     | 37   | 30,000 | ,00                                         | .          | .                      | 5 |
|                                     | 38   | 30,000 | ,00                                         | .          | .                      | 5 |
| 1,00                                | 1    | 1,000  | 1,00                                        | ,958       | ,041                   | 1 |
|                                     | 2    | 7,000  | 1,00                                        | .          | .                      | 2 |
|                                     | 3    | 7,000  | 1,00                                        | ,875       | ,068                   | 3 |
|                                     | 4    | 10,000 | 1,00                                        | ,833       | ,076                   | 4 |
|                                     | 5    | 16,000 | 1,00                                        | ,792       | ,083                   | 5 |
|                                     | 6    | 22,000 | 1,00                                        | ,750       | ,088                   | 6 |
|                                     | 7    | 30,000 | ,00                                         | .          | .                      | 6 |
|                                     | 8    | 30,000 | ,00                                         | .          | .                      | 6 |
|                                     | 9    | 30,000 | ,00                                         | .          | .                      | 6 |
|                                     | 10   | 30,000 | ,00                                         | .          | .                      | 6 |
|                                     | 11   | 30,000 | ,00                                         | .          | .                      | 6 |

Survival Table

| Empirical Antipseudomonic Treatment | N of Remaining Cases                                                                                                                                                                                                                                                                                                            |
|-------------------------------------|---------------------------------------------------------------------------------------------------------------------------------------------------------------------------------------------------------------------------------------------------------------------------------------------------------------------------------|
| ,00                                 | 1 37<br>2 36<br>3 35<br>4 34<br>5 33<br>6 32<br>7 31<br>8 30<br>9 29<br>10 28<br>11 27<br>12 26<br>13 25<br>14 24<br>15 23<br>16 22<br>17 21<br>18 20<br>19 19<br>20 18<br>21 17<br>22 16<br>23 15<br>24 14<br>25 13<br>26 12<br>27 11<br>28 10<br>29 9<br>30 8<br>31 7<br>32 6<br>33 5<br>34 4<br>35 3<br>36 2<br>37 1<br>38 0 |
| 1,00                                | 1 23<br>2 22<br>3 21<br>4 20<br>5 19<br>6 18<br>7 17<br>8 16<br>9 15<br>10 14<br>11 13                                                                                                                                                                                                                                          |

Survival Table

| Empirical Antipseudomonic Treatment | Time   | Status | Cumulative Proportion Surviving at the Time |            | N of Cumulative Events |
|-------------------------------------|--------|--------|---------------------------------------------|------------|------------------------|
|                                     |        |        | Estimate                                    | Std. Error |                        |
| 12                                  | 30,000 | ,00    | .                                           | .          | 6                      |
| 13                                  | 30,000 | ,00    | .                                           | .          | 6                      |
| 14                                  | 30,000 | ,00    | .                                           | .          | 6                      |
| 15                                  | 30,000 | ,00    | .                                           | .          | 6                      |
| 16                                  | 30,000 | ,00    | .                                           | .          | 6                      |
| 17                                  | 30,000 | ,00    | .                                           | .          | 6                      |
| 18                                  | 30,000 | ,00    | .                                           | .          | 6                      |
| 19                                  | 30,000 | ,00    | .                                           | .          | 6                      |
| 20                                  | 30,000 | ,00    | .                                           | .          | 6                      |
| 21                                  | 30,000 | ,00    | .                                           | .          | 6                      |
| 22                                  | 30,000 | ,00    | .                                           | .          | 6                      |
| 23                                  | 30,000 | ,00    | .                                           | .          | 6                      |
| 24                                  | 30,000 | ,00    | .                                           | .          | 6                      |

Survival Table

| Empirical Antipseudomonic Treatment | N of Remaining Cases |
|-------------------------------------|----------------------|
| 12                                  | 12                   |
| 13                                  | 11                   |
| 14                                  | 10                   |
| 15                                  | 9                    |
| 16                                  | 8                    |
| 17                                  | 7                    |
| 18                                  | 6                    |
| 19                                  | 5                    |
| 20                                  | 4                    |
| 21                                  | 3                    |
| 22                                  | 2                    |
| 23                                  | 1                    |
| 24                                  | 0                    |

Means and Medians for Survival Time

| Empirical Antipseudomonic Treatment | Mean <sup>a</sup> |            |                         |             | Median   |            |             |
|-------------------------------------|-------------------|------------|-------------------------|-------------|----------|------------|-------------|
|                                     | Estimate          | Std. Error | 95% Confidence Interval |             | Estimate | Std. Error | 95% ...     |
|                                     |                   |            | Lower Bound             | Upper Bound |          |            | Lower Bound |
| ,00                                 | 28,184            | ,919       | 26,383                  | 29,986      | .        | .          | .           |
| 1,00                                | 25,125            | 1,858      | 21,483                  | 28,767      | .        | .          | .           |
| Overall                             | 27,000            | ,933       | 25,171                  | 28,829      | .        | .          | .           |

Means and Medians for Survival Time

| Empirical Antipseudomonic Treatment | Median      |
|-------------------------------------|-------------|
|                                     | 95% ...     |
|                                     | Upper Bound |
| ,00                                 | .           |
| 1,00                                | .           |
| Overall                             | .           |

a. Estimation is limited to the largest survival time if it is censored.

Overall Comparisons

|                       | Chi-Square | df | Sig. |
|-----------------------|------------|----|------|
| Log Rank (Mantel-Cox) | 1,560      | 1  | ,212 |

Test of equality of survival distributions for the different levels of Empirical Antipseudomonic Treatment

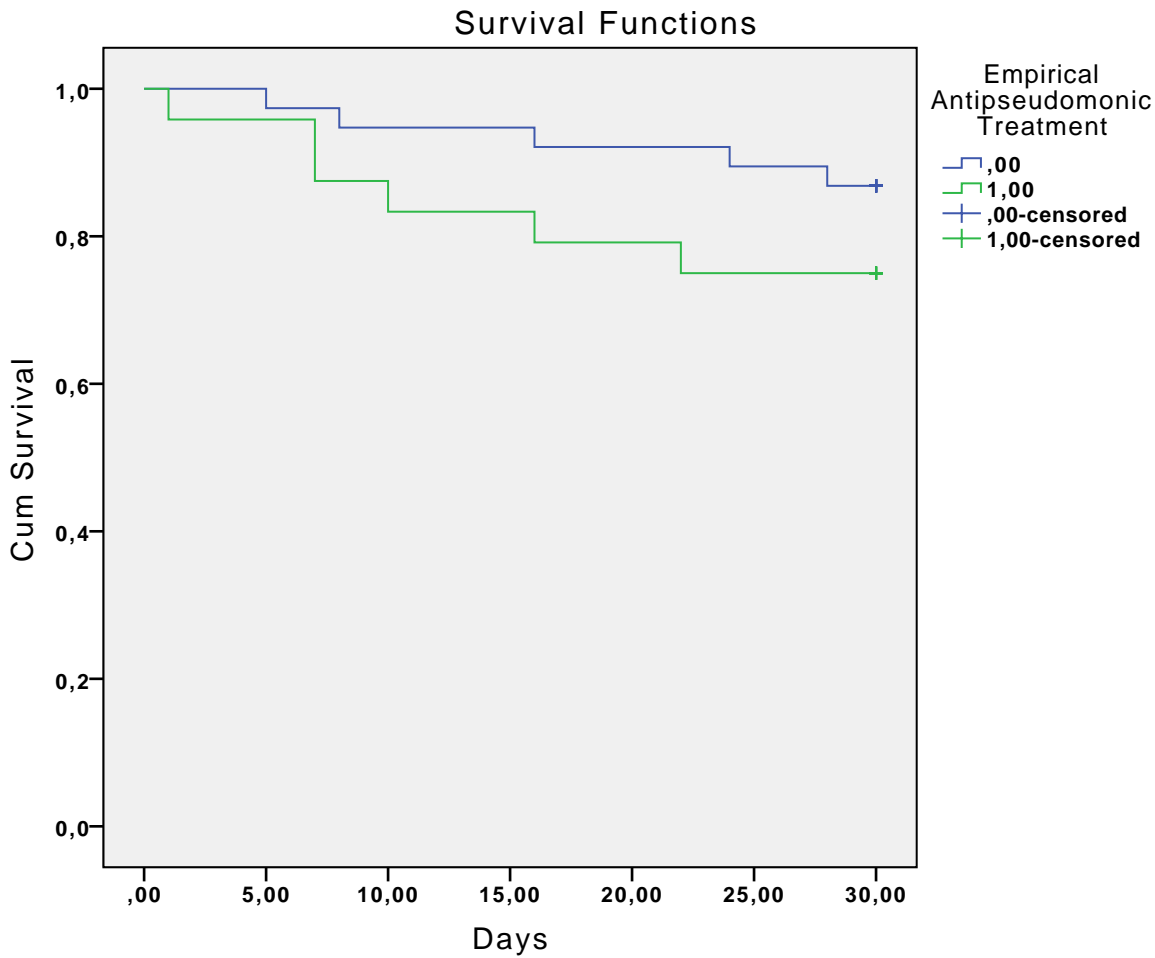

**EMPIRICAL ANTIPSEUDOMONIC BITHERAPY (0=NO, 1=YES)**

Warnings

No statistics are computed because all cases are censored.

Case Processing Summary

| Empirical Antipseudomonic Bitherapy | Total N | N of Events | Censored |         |
|-------------------------------------|---------|-------------|----------|---------|
|                                     |         |             | N        | Percent |
| ,00                                 | 59      | 11          | 48       | 81,4%   |
| 1,00                                | 3       | 0           | 3        | 100,0%  |
| Overall                             | 62      | 11          | 51       | 82,3%   |

Survival Table

| Empirical Antipseudomonic Bithierapy | Time | Status | Cumulative Proportion Surviving at the Time |            | N of Cumulative Events |
|--------------------------------------|------|--------|---------------------------------------------|------------|------------------------|
|                                      |      |        | Estimate                                    | Std. Error |                        |
| ,00                                  | 1    | 1,00   | ,983                                        | ,017       | 1                      |
|                                      | 2    | 1,00   | ,966                                        | ,024       | 2                      |
|                                      | 3    | 1,00   | .                                           | .          | 3                      |
|                                      | 4    | 1,00   | ,932                                        | ,033       | 4                      |
|                                      | 5    | 1,00   | ,915                                        | ,036       | 5                      |
|                                      | 6    | 1,00   | ,898                                        | ,039       | 6                      |
|                                      | 7    | 1,00   | .                                           | .          | 7                      |
|                                      | 8    | 1,00   | ,864                                        | ,045       | 8                      |
|                                      | 9    | 1,00   | ,847                                        | ,047       | 9                      |
|                                      | 10   | 1,00   | ,831                                        | ,049       | 10                     |
|                                      | 11   | 1,00   | ,814                                        | ,051       | 11                     |
|                                      | 12   | ,00    | .                                           | .          | 11                     |
|                                      | 13   | ,00    | .                                           | .          | 11                     |
|                                      | 14   | ,00    | .                                           | .          | 11                     |
|                                      | 15   | ,00    | .                                           | .          | 11                     |
|                                      | 16   | ,00    | .                                           | .          | 11                     |
|                                      | 17   | ,00    | .                                           | .          | 11                     |
|                                      | 18   | ,00    | .                                           | .          | 11                     |
|                                      | 19   | ,00    | .                                           | .          | 11                     |
|                                      | 20   | ,00    | .                                           | .          | 11                     |
|                                      | 21   | ,00    | .                                           | .          | 11                     |
|                                      | 22   | ,00    | .                                           | .          | 11                     |
|                                      | 23   | ,00    | .                                           | .          | 11                     |
|                                      | 24   | ,00    | .                                           | .          | 11                     |
|                                      | 25   | ,00    | .                                           | .          | 11                     |
|                                      | 26   | ,00    | .                                           | .          | 11                     |
|                                      | 27   | ,00    | .                                           | .          | 11                     |
|                                      | 28   | ,00    | .                                           | .          | 11                     |
|                                      | 29   | ,00    | .                                           | .          | 11                     |
|                                      | 30   | ,00    | .                                           | .          | 11                     |
|                                      | 31   | ,00    | .                                           | .          | 11                     |
|                                      | 32   | ,00    | .                                           | .          | 11                     |
|                                      | 33   | ,00    | .                                           | .          | 11                     |
|                                      | 34   | ,00    | .                                           | .          | 11                     |
|                                      | 35   | ,00    | .                                           | .          | 11                     |
|                                      | 36   | ,00    | .                                           | .          | 11                     |
|                                      | 37   | ,00    | .                                           | .          | 11                     |
|                                      | 38   | ,00    | .                                           | .          | 11                     |
|                                      | 39   | ,00    | .                                           | .          | 11                     |
|                                      | 40   | ,00    | .                                           | .          | 11                     |
|                                      | 41   | ,00    | .                                           | .          | 11                     |
|                                      | 42   | ,00    | .                                           | .          | 11                     |
|                                      | 43   | ,00    | .                                           | .          | 11                     |
|                                      | 44   | ,00    | .                                           | .          | 11                     |
|                                      | 45   | ,00    | .                                           | .          | 11                     |
|                                      | 46   | ,00    | .                                           | .          | 11                     |
|                                      | 47   | ,00    | .                                           | .          | 11                     |
|                                      | 48   | ,00    | .                                           | .          | 11                     |
|                                      | 49   | ,00    | .                                           | .          | 11                     |



Survival Table

| Empirical Antipseudomonic BitheraPy | N of Remaining Cases |
|-------------------------------------|----------------------|
| ,00                                 | 58                   |
| 1                                   | 57                   |
| 2                                   | 56                   |
| 3                                   | 55                   |
| 4                                   | 54                   |
| 5                                   | 53                   |
| 6                                   | 52                   |
| 7                                   | 51                   |
| 8                                   | 50                   |
| 9                                   | 49                   |
| 10                                  | 48                   |
| 11                                  | 47                   |
| 12                                  | 46                   |
| 13                                  | 45                   |
| 14                                  | 44                   |
| 15                                  | 43                   |
| 16                                  | 42                   |
| 17                                  | 41                   |
| 18                                  | 40                   |
| 19                                  | 39                   |
| 20                                  | 38                   |
| 21                                  | 37                   |
| 22                                  | 36                   |
| 23                                  | 35                   |
| 24                                  | 34                   |
| 25                                  | 33                   |
| 26                                  | 32                   |
| 27                                  | 31                   |
| 28                                  | 30                   |
| 29                                  | 29                   |
| 30                                  | 28                   |
| 31                                  | 27                   |
| 32                                  | 26                   |
| 33                                  | 25                   |
| 34                                  | 24                   |
| 35                                  | 23                   |
| 36                                  | 22                   |
| 37                                  | 21                   |
| 38                                  | 20                   |
| 39                                  | 19                   |
| 40                                  | 18                   |
| 41                                  | 17                   |
| 42                                  | 16                   |
| 43                                  | 15                   |
| 44                                  | 14                   |
| 45                                  | 13                   |
| 46                                  | 12                   |
| 47                                  | 11                   |
| 48                                  | 10                   |
| 49                                  | 10                   |

Survival Table

| Empirical Antipseudomonic Bitherapy | Time   | Status | Cumulative Proportion Surviving at the Time |            | N of Cumulative Events |
|-------------------------------------|--------|--------|---------------------------------------------|------------|------------------------|
|                                     |        |        | Estimate                                    | Std. Error |                        |
| 50                                  | 30,000 | ,00    | .                                           | .          | 11                     |
| 51                                  | 30,000 | ,00    | .                                           | .          | 11                     |
| 52                                  | 30,000 | ,00    | .                                           | .          | 11                     |
| 53                                  | 30,000 | ,00    | .                                           | .          | 11                     |
| 54                                  | 30,000 | ,00    | .                                           | .          | 11                     |
| 55                                  | 30,000 | ,00    | .                                           | .          | 11                     |
| 56                                  | 30,000 | ,00    | .                                           | .          | 11                     |
| 57                                  | 30,000 | ,00    | .                                           | .          | 11                     |
| 58                                  | 30,000 | ,00    | .                                           | .          | 11                     |
| 59                                  | 30,000 | ,00    | .                                           | .          | 11                     |
| 1,00                                | 1      | ,00    | .                                           | .          | 0                      |
|                                     | 2      | ,00    | .                                           | .          | 0                      |

Survival Table

| Empirical Antipseudomonic Bitherapy | N of Remaining Cases |
|-------------------------------------|----------------------|
| 50                                  | 9                    |
| 51                                  | 8                    |
| 52                                  | 7                    |
| 53                                  | 6                    |
| 54                                  | 5                    |
| 55                                  | 4                    |
| 56                                  | 3                    |
| 57                                  | 2                    |
| 58                                  | 1                    |
| 59                                  | 0                    |
| 1,00                                | 1                    |
|                                     | 2                    |

Overall Comparisons

|                       | Chi-Square | df | Sig. |
|-----------------------|------------|----|------|
| Log Rank (Mantel-Cox) | ,615       | 1  | ,433 |

Test of equality of survival distributions for the different levels of Empirical Antipseudomonic Bitherapy

### Survival Functions

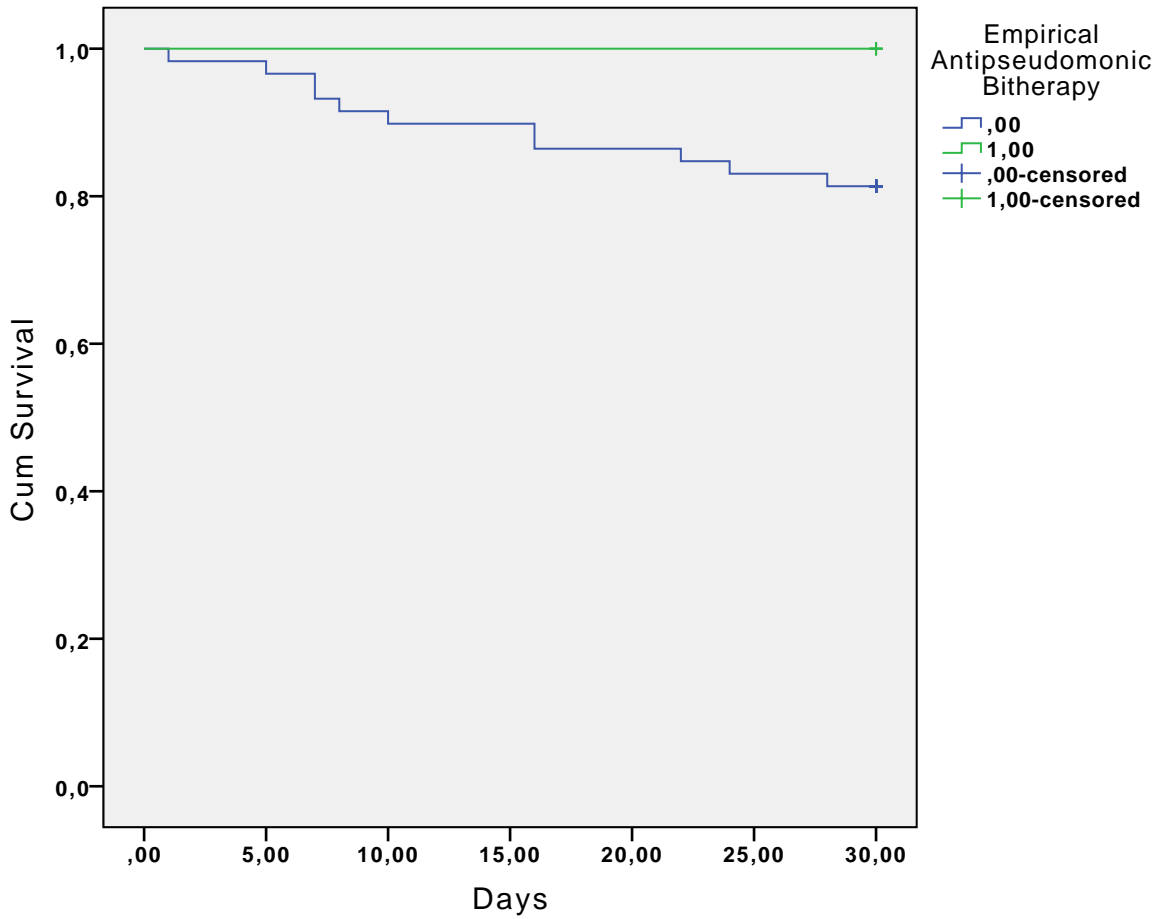

### ANTIBIOTIC BITHERAPY (0=NO, 1=YES)

Case Processing Summary

| Antibiotic Bithery | Total N | N of Events | Censored |         |
|--------------------|---------|-------------|----------|---------|
|                    |         |             | N        | Percent |
| ,00                | 48      | 10          | 38       | 79,2%   |
| 1,00               | 14      | 1           | 13       | 92,9%   |
| Overall            | 62      | 11          | 51       | 82,3%   |

Survival Table

| Antibiotic Bitherapy | Time | Status | Cumulative Proportion Surviving at the Time |            | N of Cumulative Events | N of Remaining Cases |
|----------------------|------|--------|---------------------------------------------|------------|------------------------|----------------------|
|                      |      |        | Estimate                                    | Std. Error |                        |                      |
| ,00                  | 1    | 1,00   | ,979                                        | ,021       | 1                      | 47                   |
|                      | 2    | 1,00   | ,958                                        | ,029       | 2                      | 46                   |
|                      | 3    | 1,00   | .                                           | .          | 3                      | 45                   |
|                      | 4    | 1,00   | ,917                                        | ,040       | 4                      | 44                   |
|                      | 5    | 1,00   | ,896                                        | ,044       | 5                      | 43                   |
|                      | 6    | 1,00   | .                                           | .          | 6                      | 42                   |
|                      | 7    | 1,00   | ,854                                        | ,051       | 7                      | 41                   |
|                      | 8    | 1,00   | ,833                                        | ,054       | 8                      | 40                   |
|                      | 9    | 1,00   | ,813                                        | ,056       | 9                      | 39                   |
|                      | 10   | 1,00   | ,792                                        | ,059       | 10                     | 38                   |
|                      | 11   | ,00    | .                                           | .          | 10                     | 37                   |
|                      | 12   | ,00    | .                                           | .          | 10                     | 36                   |
|                      | 13   | ,00    | .                                           | .          | 10                     | 35                   |
|                      | 14   | ,00    | .                                           | .          | 10                     | 34                   |
|                      | 15   | ,00    | .                                           | .          | 10                     | 33                   |
|                      | 16   | ,00    | .                                           | .          | 10                     | 32                   |
|                      | 17   | ,00    | .                                           | .          | 10                     | 31                   |
|                      | 18   | ,00    | .                                           | .          | 10                     | 30                   |
|                      | 19   | ,00    | .                                           | .          | 10                     | 29                   |
|                      | 20   | ,00    | .                                           | .          | 10                     | 28                   |
|                      | 21   | ,00    | .                                           | .          | 10                     | 27                   |
|                      | 22   | ,00    | .                                           | .          | 10                     | 26                   |
|                      | 23   | ,00    | .                                           | .          | 10                     | 25                   |
|                      | 24   | ,00    | .                                           | .          | 10                     | 24                   |
|                      | 25   | ,00    | .                                           | .          | 10                     | 23                   |
|                      | 26   | ,00    | .                                           | .          | 10                     | 22                   |
|                      | 27   | ,00    | .                                           | .          | 10                     | 21                   |
|                      | 28   | ,00    | .                                           | .          | 10                     | 20                   |
|                      | 29   | ,00    | .                                           | .          | 10                     | 19                   |
|                      | 30   | ,00    | .                                           | .          | 10                     | 18                   |
|                      | 31   | ,00    | .                                           | .          | 10                     | 17                   |
|                      | 32   | ,00    | .                                           | .          | 10                     | 16                   |
|                      | 33   | ,00    | .                                           | .          | 10                     | 15                   |
|                      | 34   | ,00    | .                                           | .          | 10                     | 14                   |
|                      | 35   | ,00    | .                                           | .          | 10                     | 13                   |
|                      | 36   | ,00    | .                                           | .          | 10                     | 12                   |
|                      | 37   | ,00    | .                                           | .          | 10                     | 11                   |
|                      | 38   | ,00    | .                                           | .          | 10                     | 10                   |
|                      | 39   | ,00    | .                                           | .          | 10                     | 9                    |
|                      | 40   | ,00    | .                                           | .          | 10                     | 8                    |
|                      | 41   | ,00    | .                                           | .          | 10                     | 7                    |
|                      | 42   | ,00    | .                                           | .          | 10                     | 6                    |
|                      | 43   | ,00    | .                                           | .          | 10                     | 5                    |
|                      | 44   | ,00    | .                                           | .          | 10                     | 4                    |
|                      | 45   | ,00    | .                                           | .          | 10                     | 3                    |
|                      | 46   | ,00    | .                                           | .          | 10                     | 2                    |
|                      | 47   | ,00    | .                                           | .          | 10                     | 1                    |
|                      | 48   | ,00    | .                                           | .          | 10                     | 0                    |

Survival Table

| Antibiotic Bithera <sup>v</sup> | Time | Status | Cumulative Proportion Surviving at the Time |            | N of Cumulative Events | N of Remaining Cases |    |
|---------------------------------|------|--------|---------------------------------------------|------------|------------------------|----------------------|----|
|                                 |      |        | Estimate                                    | Std. Error |                        |                      |    |
| 1,00                            | 1    | 10,000 | 1,00                                        | ,929       | ,069                   | 1                    | 13 |
|                                 | 2    | 30,000 | ,00                                         | .          | .                      | 1                    | 12 |
|                                 | 3    | 30,000 | ,00                                         | .          | .                      | 1                    | 11 |
|                                 | 4    | 30,000 | ,00                                         | .          | .                      | 1                    | 10 |
|                                 | 5    | 30,000 | ,00                                         | .          | .                      | 1                    | 9  |
|                                 | 6    | 30,000 | ,00                                         | .          | .                      | 1                    | 8  |
|                                 | 7    | 30,000 | ,00                                         | .          | .                      | 1                    | 7  |
|                                 | 8    | 30,000 | ,00                                         | .          | .                      | 1                    | 6  |
|                                 | 9    | 30,000 | ,00                                         | .          | .                      | 1                    | 5  |
|                                 | 10   | 30,000 | ,00                                         | .          | .                      | 1                    | 4  |
|                                 | 11   | 30,000 | ,00                                         | .          | .                      | 1                    | 3  |
|                                 | 12   | 30,000 | ,00                                         | .          | .                      | 1                    | 2  |
|                                 | 13   | 30,000 | ,00                                         | .          | .                      | 1                    | 1  |
|                                 | 14   | 30,000 | ,00                                         | .          | .                      | 1                    | 0  |

Means and Medians for Survival Time

| Antibiotic Bithera <sup>y</sup> | Mean <sup>a</sup> |            |                         |             | Median   |            |             |
|---------------------------------|-------------------|------------|-------------------------|-------------|----------|------------|-------------|
|                                 | Estimate          | Std. Error | 95% Confidence Interval |             | Estimate | Std. Error | 95% ...     |
|                                 |                   |            | Lower Bound             | Upper Bound |          |            | Lower Bound |
| ,00                             | 26,542            | 1,128      | 24,331                  | 28,752      | .        | .          | .           |
| 1,00                            | 28,571            | 1,377      | 25,873                  | 31,270      | .        | .          | .           |
| Overall                         | 27,000            | ,933       | 25,171                  | 28,829      | .        | .          | .           |

Means and Medians for Survival Time

| Antibiotic Bithera <sup>y</sup> | Median      |
|---------------------------------|-------------|
|                                 | 95% ...     |
|                                 | Upper Bound |
| ,00                             | .           |
| 1,00                            | .           |
| Overall                         | .           |

a. Estimation is limited to the largest survival time if it is censored.

Overall Comparisons

|                       | Chi-Square | df | Sig. |
|-----------------------|------------|----|------|
| Log Rank (Mantel-Cox) | 1,310      | 1  | ,252 |

Test of equality of survival distributions for the different levels of Antibiotic Bithera<sup>y</sup>

### Survival Functions

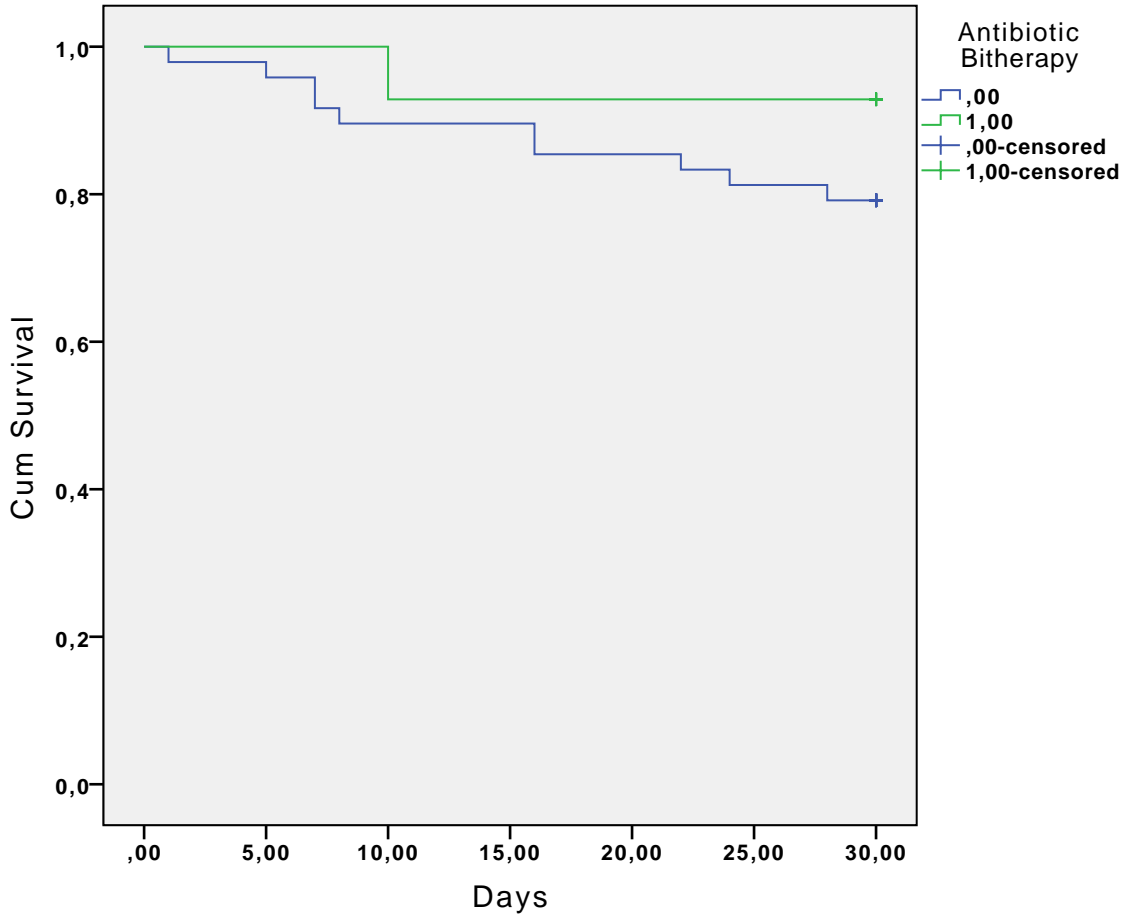

### HYPOTENSION (0=NO, 1=YES)

Case Processing Summary

| Hypotension | Total N | N of Events | Censored |         |
|-------------|---------|-------------|----------|---------|
|             |         |             | N        | Percent |
| ,0          | 50      | 8           | 42       | 84,0%   |
| 1,0         | 11      | 3           | 8        | 72,7%   |
| Overall     | 61      | 11          | 50       | 82,0%   |

Survival Table

| Hypotension | Time  | Status | Cumulative Proportion Surviving at the Time |            | N of Cumulative Events | N of Remaining Cases |
|-------------|-------|--------|---------------------------------------------|------------|------------------------|----------------------|
|             |       |        | Estimate                                    | Std. Error |                        |                      |
| ,0 1        | 1,000 | 1,00   | ,980                                        | ,020       | 1                      | 49                   |
| 2           | 7,000 | 1,00   | .                                           | .          | 2                      | 48                   |

Survival Table

| Hypotension | Time   | Status | Cumulative Proportion Surviving at the Time |            | N of Cumulative Events | N of Remaining Cases |
|-------------|--------|--------|---------------------------------------------|------------|------------------------|----------------------|
|             |        |        | Estimate                                    | Std. Error |                        |                      |
| 3           | 7,000  | 1,00   | ,940                                        | ,034       | 3                      | 47                   |
| 4           | 10,000 | 1,00   | ,920                                        | ,038       | 4                      | 46                   |
| 5           | 16,000 | 1,00   | .                                           | .          | 5                      | 45                   |
| 6           | 16,000 | 1,00   | ,880                                        | ,046       | 6                      | 44                   |
| 7           | 22,000 | 1,00   | ,860                                        | ,049       | 7                      | 43                   |
| 8           | 24,000 | 1,00   | ,840                                        | ,052       | 8                      | 42                   |
| 9           | 30,000 | ,00    | .                                           | .          | 8                      | 41                   |
| 10          | 30,000 | ,00    | .                                           | .          | 8                      | 40                   |
| 11          | 30,000 | ,00    | .                                           | .          | 8                      | 39                   |
| 12          | 30,000 | ,00    | .                                           | .          | 8                      | 38                   |
| 13          | 30,000 | ,00    | .                                           | .          | 8                      | 37                   |
| 14          | 30,000 | ,00    | .                                           | .          | 8                      | 36                   |
| 15          | 30,000 | ,00    | .                                           | .          | 8                      | 35                   |
| 16          | 30,000 | ,00    | .                                           | .          | 8                      | 34                   |
| 17          | 30,000 | ,00    | .                                           | .          | 8                      | 33                   |
| 18          | 30,000 | ,00    | .                                           | .          | 8                      | 32                   |
| 19          | 30,000 | ,00    | .                                           | .          | 8                      | 31                   |
| 20          | 30,000 | ,00    | .                                           | .          | 8                      | 30                   |
| 21          | 30,000 | ,00    | .                                           | .          | 8                      | 29                   |
| 22          | 30,000 | ,00    | .                                           | .          | 8                      | 28                   |
| 23          | 30,000 | ,00    | .                                           | .          | 8                      | 27                   |
| 24          | 30,000 | ,00    | .                                           | .          | 8                      | 26                   |
| 25          | 30,000 | ,00    | .                                           | .          | 8                      | 25                   |
| 26          | 30,000 | ,00    | .                                           | .          | 8                      | 24                   |
| 27          | 30,000 | ,00    | .                                           | .          | 8                      | 23                   |
| 28          | 30,000 | ,00    | .                                           | .          | 8                      | 22                   |
| 29          | 30,000 | ,00    | .                                           | .          | 8                      | 21                   |
| 30          | 30,000 | ,00    | .                                           | .          | 8                      | 20                   |
| 31          | 30,000 | ,00    | .                                           | .          | 8                      | 19                   |
| 32          | 30,000 | ,00    | .                                           | .          | 8                      | 18                   |
| 33          | 30,000 | ,00    | .                                           | .          | 8                      | 17                   |
| 34          | 30,000 | ,00    | .                                           | .          | 8                      | 16                   |
| 35          | 30,000 | ,00    | .                                           | .          | 8                      | 15                   |
| 36          | 30,000 | ,00    | .                                           | .          | 8                      | 14                   |
| 37          | 30,000 | ,00    | .                                           | .          | 8                      | 13                   |
| 38          | 30,000 | ,00    | .                                           | .          | 8                      | 12                   |
| 39          | 30,000 | ,00    | .                                           | .          | 8                      | 11                   |
| 40          | 30,000 | ,00    | .                                           | .          | 8                      | 10                   |
| 41          | 30,000 | ,00    | .                                           | .          | 8                      | 9                    |
| 42          | 30,000 | ,00    | .                                           | .          | 8                      | 8                    |
| 43          | 30,000 | ,00    | .                                           | .          | 8                      | 7                    |
| 44          | 30,000 | ,00    | .                                           | .          | 8                      | 6                    |
| 45          | 30,000 | ,00    | .                                           | .          | 8                      | 5                    |
| 46          | 30,000 | ,00    | .                                           | .          | 8                      | 4                    |
| 47          | 30,000 | ,00    | .                                           | .          | 8                      | 3                    |
| 48          | 30,000 | ,00    | .                                           | .          | 8                      | 2                    |
| 49          | 30,000 | ,00    | .                                           | .          | 8                      | 1                    |
| 50          | 30,000 | ,00    | .                                           | .          | 8                      | 0                    |



Survival Table

| Hypotension | Time | Status | Cumulative Proportion Surviving at the Time |            | N of Cumulative Events | N of Remaining Cases |    |
|-------------|------|--------|---------------------------------------------|------------|------------------------|----------------------|----|
|             |      |        | Estimate                                    | Std. Error |                        |                      |    |
| 1,0         | 1    | 5,000  | 1,00                                        | ,909       | ,087                   | 1                    | 10 |
|             | 2    | 8,000  | 1,00                                        | ,818       | ,116                   | 2                    | 9  |
|             | 3    | 28,000 | 1,00                                        | ,727       | ,134                   | 3                    | 8  |
|             | 4    | 30,000 | ,00                                         | .          | .                      | 3                    | 7  |
|             | 5    | 30,000 | ,00                                         | .          | .                      | 3                    | 6  |
|             | 6    | 30,000 | ,00                                         | .          | .                      | 3                    | 5  |
|             | 7    | 30,000 | ,00                                         | .          | .                      | 3                    | 4  |
|             | 8    | 30,000 | ,00                                         | .          | .                      | 3                    | 3  |
|             | 9    | 30,000 | ,00                                         | .          | .                      | 3                    | 2  |
|             | 10   | 30,000 | ,00                                         | .          | .                      | 3                    | 1  |
|             | 11   | 30,000 | ,00                                         | .          | .                      | 3                    | 0  |

Means and Medians for Survival Time

| Hypotension | Mean <sup>a</sup> |            |                         |             | Median   |            |             |
|-------------|-------------------|------------|-------------------------|-------------|----------|------------|-------------|
|             | Estimate          | Std. Error | 95% Confidence Interval |             | Estimate | Std. Error | 95% ...     |
|             |                   |            | Lower Bound             | Upper Bound |          |            | Lower Bound |
| ,0          | 27,260            | ,983       | 25,333                  | 29,187      | .        | .          | .           |
| 1,0         | 25,545            | 2,719      | 20,216                  | 30,875      | .        | .          | .           |
| Overall     | 26,951            | ,947       | 25,095                  | 28,807      | .        | .          | .           |

Means and Medians for Survival Time

| Hypotension | Median      |
|-------------|-------------|
|             | 95% ...     |
|             | Upper Bound |
| ,0          | .           |
| 1,0         | .           |
| Overall     | .           |

a. Estimation is limited to the largest survival time if it is censored.

Overall Comparisons

|                       | Chi-Square | df | Sig. |
|-----------------------|------------|----|------|
| Log Rank (Mantel-Cox) | ,801       | 1  | ,371 |

Test of equality of survival distributions for the different levels of Hypotension

### Survival Functions

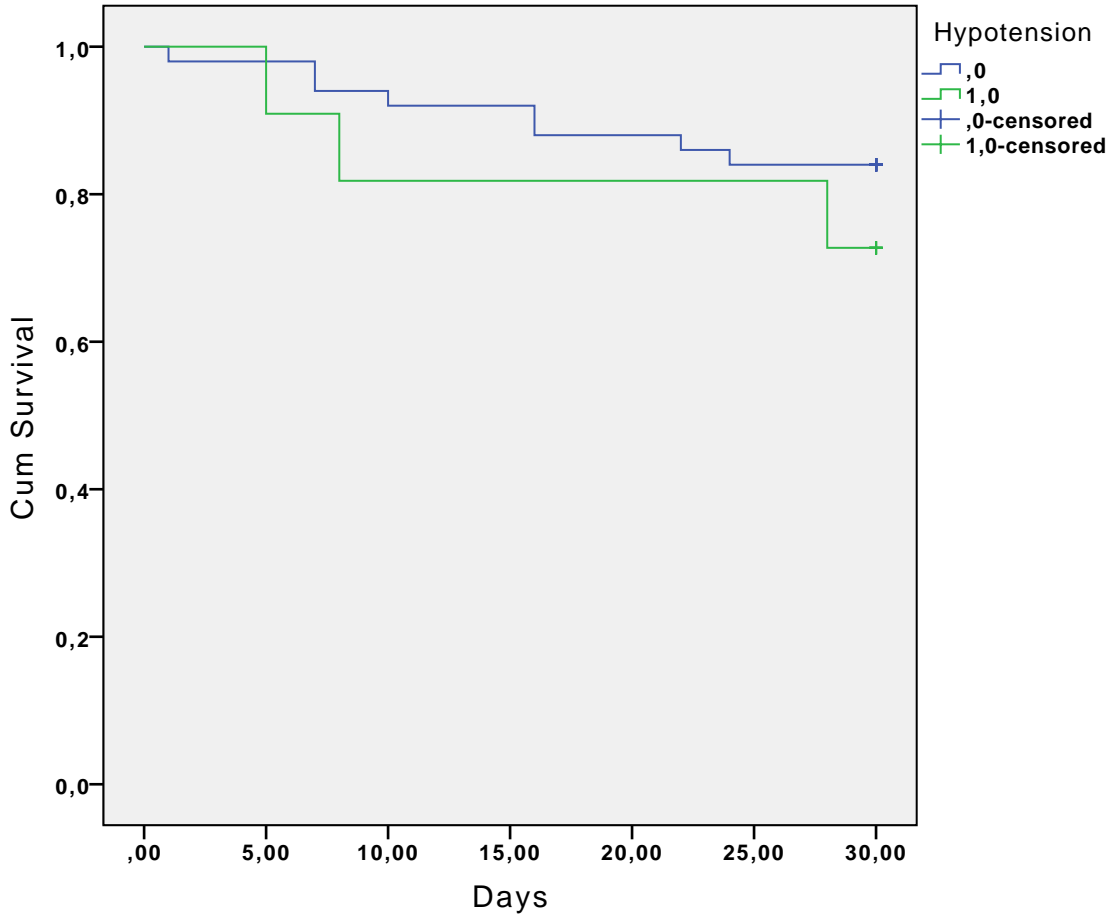

### TACHYCARDIA (0=NO, 1=YES)

#### Case Processing Summary

| Tachycardia    | Total N   | N of Events | Censored  |              |
|----------------|-----------|-------------|-----------|--------------|
|                |           |             | N         | Percent      |
| ,0             | 41        | 7           | 34        | 82,9%        |
| 1,0            | 14        | 3           | 11        | 78,6%        |
| <b>Overall</b> | <b>55</b> | <b>10</b>   | <b>45</b> | <b>81,8%</b> |

Survival Table

| Tachycardia | Time | Status | Cumulative Proportion Surviving at the Time |            | N of Cumulative Events | N of Remaining Cases |
|-------------|------|--------|---------------------------------------------|------------|------------------------|----------------------|
|             |      |        | Estimate                                    | Std. Error |                        |                      |
| ,0          | 1    | 1,00   | ,976                                        | ,024       | 1                      | 40                   |
|             | 2    | 1,00   | ,951                                        | ,034       | 2                      | 39                   |
|             | 3    | 1,00   | ,927                                        | ,041       | 3                      | 38                   |
|             | 4    | 1,00   | .                                           | .          | 4                      | 37                   |
|             | 5    | 1,00   | ,878                                        | ,051       | 5                      | 36                   |
|             | 6    | 1,00   | ,854                                        | ,055       | 6                      | 35                   |
|             | 7    | 1,00   | ,829                                        | ,059       | 7                      | 34                   |
|             | 8    | ,00    | .                                           | .          | 7                      | 33                   |
|             | 9    | ,00    | .                                           | .          | 7                      | 32                   |
|             | 10   | ,00    | .                                           | .          | 7                      | 31                   |
|             | 11   | ,00    | .                                           | .          | 7                      | 30                   |
|             | 12   | ,00    | .                                           | .          | 7                      | 29                   |
|             | 13   | ,00    | .                                           | .          | 7                      | 28                   |
|             | 14   | ,00    | .                                           | .          | 7                      | 27                   |
|             | 15   | ,00    | .                                           | .          | 7                      | 26                   |
|             | 16   | ,00    | .                                           | .          | 7                      | 25                   |
|             | 17   | ,00    | .                                           | .          | 7                      | 24                   |
|             | 18   | ,00    | .                                           | .          | 7                      | 23                   |
|             | 19   | ,00    | .                                           | .          | 7                      | 22                   |
|             | 20   | ,00    | .                                           | .          | 7                      | 21                   |
|             | 21   | ,00    | .                                           | .          | 7                      | 20                   |
|             | 22   | ,00    | .                                           | .          | 7                      | 19                   |
|             | 23   | ,00    | .                                           | .          | 7                      | 18                   |
|             | 24   | ,00    | .                                           | .          | 7                      | 17                   |
|             | 25   | ,00    | .                                           | .          | 7                      | 16                   |
|             | 26   | ,00    | .                                           | .          | 7                      | 15                   |
|             | 27   | ,00    | .                                           | .          | 7                      | 14                   |
|             | 28   | ,00    | .                                           | .          | 7                      | 13                   |
|             | 29   | ,00    | .                                           | .          | 7                      | 12                   |
|             | 30   | ,00    | .                                           | .          | 7                      | 11                   |
|             | 31   | ,00    | .                                           | .          | 7                      | 10                   |
|             | 32   | ,00    | .                                           | .          | 7                      | 9                    |
|             | 33   | ,00    | .                                           | .          | 7                      | 8                    |
|             | 34   | ,00    | .                                           | .          | 7                      | 7                    |
|             | 35   | ,00    | .                                           | .          | 7                      | 6                    |
|             | 36   | ,00    | .                                           | .          | 7                      | 5                    |
|             | 37   | ,00    | .                                           | .          | 7                      | 4                    |
|             | 38   | ,00    | .                                           | .          | 7                      | 3                    |
|             | 39   | ,00    | .                                           | .          | 7                      | 2                    |
|             | 40   | ,00    | .                                           | .          | 7                      | 1                    |
|             | 41   | ,00    | .                                           | .          | 7                      | 0                    |
| 1,0         | 1    | 1,00   | ,929                                        | ,069       | 1                      | 13                   |
|             | 2    | 1,00   | ,857                                        | ,094       | 2                      | 12                   |
|             | 3    | 1,00   | ,786                                        | ,110       | 3                      | 11                   |
|             | 4    | ,00    | .                                           | .          | 3                      | 10                   |
|             | 5    | ,00    | .                                           | .          | 3                      | 9                    |
|             | 6    | ,00    | .                                           | .          | 3                      | 8                    |
|             | 7    | ,00    | .                                           | .          | 3                      | 7                    |
|             | 8    | ,00    | .                                           | .          | 3                      | 6                    |

Survival Table

| Tachycardia | Time   | Status | Cumulative Proportion Surviving at the Time |            | N of Cumulative Events | N of Remaining Cases |
|-------------|--------|--------|---------------------------------------------|------------|------------------------|----------------------|
|             |        |        | Estimate                                    | Std. Error |                        |                      |
| 9           | 30,000 | ,00    | .                                           | .          | 3                      | 5                    |
| 10          | 30,000 | ,00    | .                                           | .          | 3                      | 4                    |
| 11          | 30,000 | ,00    | .                                           | .          | 3                      | 3                    |
| 12          | 30,000 | ,00    | .                                           | .          | 3                      | 2                    |
| 13          | 30,000 | ,00    | .                                           | .          | 3                      | 1                    |
| 14          | 30,000 | ,00    | .                                           | .          | 3                      | 0                    |

Means and Medians for Survival Time

| Tachycardia | Mean <sup>a</sup> |            |                         |             | Median   |            |                         |             |
|-------------|-------------------|------------|-------------------------|-------------|----------|------------|-------------------------|-------------|
|             | Estimate          | Std. Error | 95% Confidence Interval |             | Estimate | Std. Error | 95% Confidence Interval |             |
|             |                   |            | Lower Bound             | Upper Bound |          |            | Lower Bound             | Upper Bound |
| ,0          | 27,488            | ,980       | 25,567                  | 29,408      | .        | .          | .                       | .           |
| 1,0         | 25,857            | 2,439      | 21,077                  | 30,637      | .        | .          | .                       | .           |
| Overall     | 27,073            | ,963       | 25,184                  | 28,961      | .        | .          | .                       | .           |

a. Estimation is limited to the largest survival time if it is censored.

Overall Comparisons

|                       | Chi-Square | df | Sig. |
|-----------------------|------------|----|------|
| Log Rank (Mantel-Cox) | ,180       | 1  | ,671 |

Test of equality of survival distributions for the different levels of Tachycardia

Survival Functions

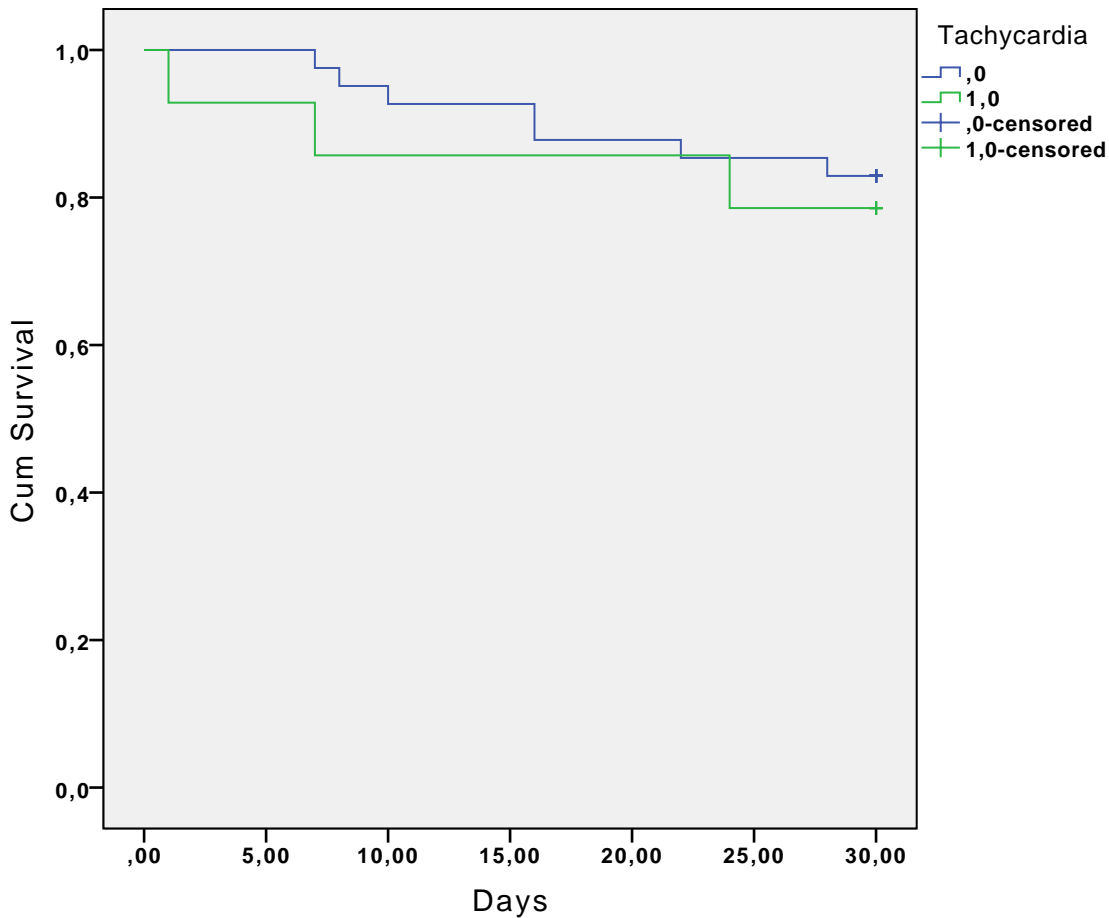

# FEVER (0=NO, 1=YES)

## Case Processing Summary

| Fever   | Total N | N of Events | Censored |         |
|---------|---------|-------------|----------|---------|
|         |         |             | N        | Percent |
| ,0      | 36      | 9           | 27       | 75,0%   |
| 1,0     | 26      | 2           | 24       | 92,3%   |
| Overall | 62      | 11          | 51       | 82,3%   |

## Survival Table

| Fever | Time | Status | Cumulative Proportion Surviving at the Time |            | N of Cumulative Events | N of Remaining Cases |
|-------|------|--------|---------------------------------------------|------------|------------------------|----------------------|
|       |      |        | Estimate                                    | Std. Error |                        |                      |
| ,0    | 1    | 1,00   | ,972                                        | ,027       | 1                      | 35                   |
|       | 2    | 1,00   | .                                           | .          | 2                      | 34                   |
|       | 3    | 1,00   | ,917                                        | ,046       | 3                      | 33                   |
|       | 4    | 1,00   | ,889                                        | ,052       | 4                      | 32                   |
|       | 5    | 1,00   | ,861                                        | ,058       | 5                      | 31                   |
|       | 6    | 1,00   | ,833                                        | ,062       | 6                      | 30                   |
|       | 7    | 1,00   | ,806                                        | ,066       | 7                      | 29                   |
|       | 8    | 1,00   | ,778                                        | ,069       | 8                      | 28                   |
|       | 9    | 1,00   | ,750                                        | ,072       | 9                      | 27                   |
|       | 10   | ,00    | .                                           | .          | 9                      | 26                   |
|       | 11   | ,00    | .                                           | .          | 9                      | 25                   |
|       | 12   | ,00    | .                                           | .          | 9                      | 24                   |
|       | 13   | ,00    | .                                           | .          | 9                      | 23                   |
|       | 14   | ,00    | .                                           | .          | 9                      | 22                   |
|       | 15   | ,00    | .                                           | .          | 9                      | 21                   |
|       | 16   | ,00    | .                                           | .          | 9                      | 20                   |
|       | 17   | ,00    | .                                           | .          | 9                      | 19                   |
|       | 18   | ,00    | .                                           | .          | 9                      | 18                   |
|       | 19   | ,00    | .                                           | .          | 9                      | 17                   |
|       | 20   | ,00    | .                                           | .          | 9                      | 16                   |
|       | 21   | ,00    | .                                           | .          | 9                      | 15                   |
|       | 22   | ,00    | .                                           | .          | 9                      | 14                   |
|       | 23   | ,00    | .                                           | .          | 9                      | 13                   |
|       | 24   | ,00    | .                                           | .          | 9                      | 12                   |
|       | 25   | ,00    | .                                           | .          | 9                      | 11                   |
|       | 26   | ,00    | .                                           | .          | 9                      | 10                   |
|       | 27   | ,00    | .                                           | .          | 9                      | 9                    |
|       | 28   | ,00    | .                                           | .          | 9                      | 8                    |
|       | 29   | ,00    | .                                           | .          | 9                      | 7                    |
|       | 30   | ,00    | .                                           | .          | 9                      | 6                    |
|       | 31   | ,00    | .                                           | .          | 9                      | 5                    |
|       | 32   | ,00    | .                                           | .          | 9                      | 4                    |
|       | 33   | ,00    | .                                           | .          | 9                      | 3                    |
|       | 34   | ,00    | .                                           | .          | 9                      | 2                    |
|       | 35   | ,00    | .                                           | .          | 9                      | 1                    |
|       | 36   | ,00    | .                                           | .          | 9                      | 0                    |
| 1,0   | 1    | 1,00   | ,962                                        | ,038       | 1                      | 25                   |
|       | 2    | 1,00   | ,923                                        | ,052       | 2                      | 24                   |
|       | 3    | ,00    | .                                           | .          | 2                      | 23                   |

Survival Table

| Fever | Time   | Status | Cumulative Proportion Surviving at the Time |            | N of Cumulative Events | N of Remaining Cases |
|-------|--------|--------|---------------------------------------------|------------|------------------------|----------------------|
|       |        |        | Estimate                                    | Std. Error |                        |                      |
| 4     | 30,000 | ,00    | .                                           | .          | 2                      | 22                   |
| 5     | 30,000 | ,00    | .                                           | .          | 2                      | 21                   |
| 6     | 30,000 | ,00    | .                                           | .          | 2                      | 20                   |
| 7     | 30,000 | ,00    | .                                           | .          | 2                      | 19                   |
| 8     | 30,000 | ,00    | .                                           | .          | 2                      | 18                   |
| 9     | 30,000 | ,00    | .                                           | .          | 2                      | 17                   |
| 10    | 30,000 | ,00    | .                                           | .          | 2                      | 16                   |
| 11    | 30,000 | ,00    | .                                           | .          | 2                      | 15                   |
| 12    | 30,000 | ,00    | .                                           | .          | 2                      | 14                   |
| 13    | 30,000 | ,00    | .                                           | .          | 2                      | 13                   |
| 14    | 30,000 | ,00    | .                                           | .          | 2                      | 12                   |
| 15    | 30,000 | ,00    | .                                           | .          | 2                      | 11                   |
| 16    | 30,000 | ,00    | .                                           | .          | 2                      | 10                   |
| 17    | 30,000 | ,00    | .                                           | .          | 2                      | 9                    |
| 18    | 30,000 | ,00    | .                                           | .          | 2                      | 8                    |
| 19    | 30,000 | ,00    | .                                           | .          | 2                      | 7                    |
| 20    | 30,000 | ,00    | .                                           | .          | 2                      | 6                    |
| 21    | 30,000 | ,00    | .                                           | .          | 2                      | 5                    |
| 22    | 30,000 | ,00    | .                                           | .          | 2                      | 4                    |
| 23    | 30,000 | ,00    | .                                           | .          | 2                      | 3                    |
| 24    | 30,000 | ,00    | .                                           | .          | 2                      | 2                    |
| 25    | 30,000 | ,00    | .                                           | .          | 2                      | 1                    |
| 26    | 30,000 | ,00    | .                                           | .          | 2                      | 0                    |

Means and Medians for Survival Time

| Fever   | Mean <sup>a</sup> |            |                         |             | Median   |            |                         |             |
|---------|-------------------|------------|-------------------------|-------------|----------|------------|-------------------------|-------------|
|         | Estimate          | Std. Error | 95% Confidence Interval |             | Estimate | Std. Error | 95% Confidence Interval |             |
|         |                   |            | Lower Bound             | Upper Bound |          |            | Lower Bound             | Upper Bound |
| ,0      | 25,917            | 1,384      | 23,204                  | 28,629      | .        | .          | .                       | .           |
| 1,0     | 28,500            | 1,062      | 26,418                  | 30,582      | .        | .          | .                       | .           |
| Overall | 27,000            | ,933       | 25,171                  | 28,829      | .        | .          | .                       | .           |

a. Estimation is limited to the largest survival time if it is censored.

Overall Comparisons

|                       | Chi-Square | df | Sig. |
|-----------------------|------------|----|------|
| Log Rank (Mantel-Cox) | 2,919      | 1  | ,088 |

Test of equality of survival distributions for the different levels of Fever

### Survival Functions

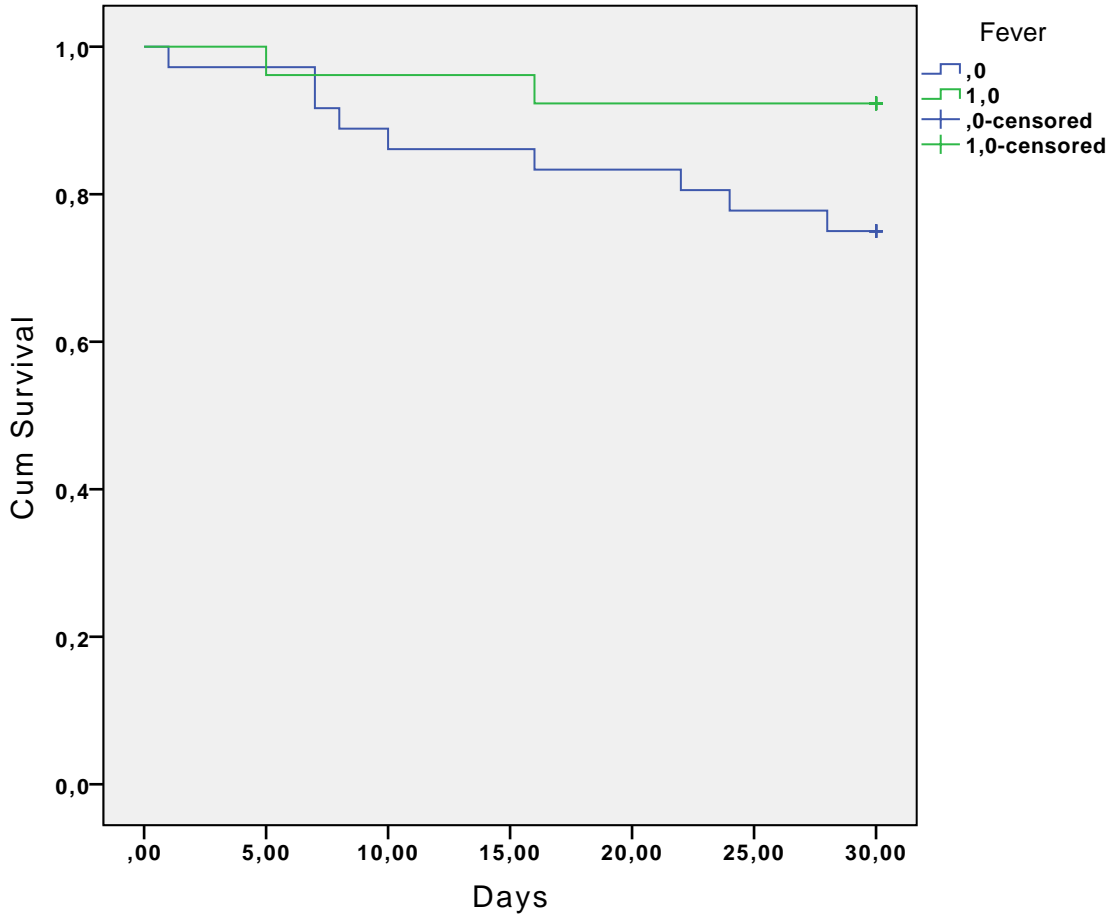

### MULTIRESISTANT PSEUDOMONAS (0=NO, 1=YES)

#### Case Processing Summary

| Multiresistant Pseudomonas | Total N | N of Events | Censored |         |
|----------------------------|---------|-------------|----------|---------|
|                            |         |             | N        | Percent |
| ,0                         | 44      | 6           | 38       | 86,4%   |
| 1,0                        | 13      | 3           | 10       | 76,9%   |
| Overall                    | 57      | 9           | 48       | 84,2%   |

Survival Table

| Multiresistant Pseudomonas | Time | Status | Cumulative Proportion Surviving at the Time |            | N of Cumulative Events | N of Remaining Cases |    |
|----------------------------|------|--------|---------------------------------------------|------------|------------------------|----------------------|----|
|                            |      |        | Estimate                                    | Std. Error |                        |                      |    |
| ,0                         | 1    | 5,000  | 1,00                                        | ,977       | ,022                   | 1                    | 43 |
|                            | 2    | 7,000  | 1,00                                        | .          | .                      | 2                    | 42 |
|                            | 3    | 7,000  | 1,00                                        | ,932       | ,038                   | 3                    | 41 |
|                            | 4    | 22,000 | 1,00                                        | ,909       | ,043                   | 4                    | 40 |
|                            | 5    | 24,000 | 1,00                                        | ,886       | ,048                   | 5                    | 39 |
|                            | 6    | 28,000 | 1,00                                        | ,864       | ,052                   | 6                    | 38 |
|                            | 7    | 30,000 | ,00                                         | .          | .                      | 6                    | 37 |
|                            | 8    | 30,000 | ,00                                         | .          | .                      | 6                    | 36 |
|                            | 9    | 30,000 | ,00                                         | .          | .                      | 6                    | 35 |
|                            | 10   | 30,000 | ,00                                         | .          | .                      | 6                    | 34 |
|                            | 11   | 30,000 | ,00                                         | .          | .                      | 6                    | 33 |
|                            | 12   | 30,000 | ,00                                         | .          | .                      | 6                    | 32 |
|                            | 13   | 30,000 | ,00                                         | .          | .                      | 6                    | 31 |
|                            | 14   | 30,000 | ,00                                         | .          | .                      | 6                    | 30 |
|                            | 15   | 30,000 | ,00                                         | .          | .                      | 6                    | 29 |
|                            | 16   | 30,000 | ,00                                         | .          | .                      | 6                    | 28 |
|                            | 17   | 30,000 | ,00                                         | .          | .                      | 6                    | 27 |
|                            | 18   | 30,000 | ,00                                         | .          | .                      | 6                    | 26 |
|                            | 19   | 30,000 | ,00                                         | .          | .                      | 6                    | 25 |
|                            | 20   | 30,000 | ,00                                         | .          | .                      | 6                    | 24 |
|                            | 21   | 30,000 | ,00                                         | .          | .                      | 6                    | 23 |
|                            | 22   | 30,000 | ,00                                         | .          | .                      | 6                    | 22 |
|                            | 23   | 30,000 | ,00                                         | .          | .                      | 6                    | 21 |
|                            | 24   | 30,000 | ,00                                         | .          | .                      | 6                    | 20 |
|                            | 25   | 30,000 | ,00                                         | .          | .                      | 6                    | 19 |
|                            | 26   | 30,000 | ,00                                         | .          | .                      | 6                    | 18 |
|                            | 27   | 30,000 | ,00                                         | .          | .                      | 6                    | 17 |
|                            | 28   | 30,000 | ,00                                         | .          | .                      | 6                    | 16 |
|                            | 29   | 30,000 | ,00                                         | .          | .                      | 6                    | 15 |
|                            | 30   | 30,000 | ,00                                         | .          | .                      | 6                    | 14 |
|                            | 31   | 30,000 | ,00                                         | .          | .                      | 6                    | 13 |
|                            | 32   | 30,000 | ,00                                         | .          | .                      | 6                    | 12 |
|                            | 33   | 30,000 | ,00                                         | .          | .                      | 6                    | 11 |
|                            | 34   | 30,000 | ,00                                         | .          | .                      | 6                    | 10 |
|                            | 35   | 30,000 | ,00                                         | .          | .                      | 6                    | 9  |
|                            | 36   | 30,000 | ,00                                         | .          | .                      | 6                    | 8  |
|                            | 37   | 30,000 | ,00                                         | .          | .                      | 6                    | 7  |
|                            | 38   | 30,000 | ,00                                         | .          | .                      | 6                    | 6  |
|                            | 39   | 30,000 | ,00                                         | .          | .                      | 6                    | 5  |
|                            | 40   | 30,000 | ,00                                         | .          | .                      | 6                    | 4  |
|                            | 41   | 30,000 | ,00                                         | .          | .                      | 6                    | 3  |
|                            | 42   | 30,000 | ,00                                         | .          | .                      | 6                    | 2  |
|                            | 43   | 30,000 | ,00                                         | .          | .                      | 6                    | 1  |
|                            | 44   | 30,000 | ,00                                         | .          | .                      | 6                    | 0  |
| 1,0                        | 1    | 1,000  | 1,00                                        | ,923       | ,074                   | 1                    | 12 |
|                            | 2    | 16,000 | 1,00                                        | .          | .                      | 2                    | 11 |
|                            | 3    | 16,000 | 1,00                                        | ,769       | ,117                   | 3                    | 10 |
|                            | 4    | 30,000 | ,00                                         | .          | .                      | 3                    | 9  |
|                            | 5    | 30,000 | ,00                                         | .          | .                      | 3                    | 8  |



Survival Table

| Multiresistant Pseudomonas | Time   | Status | Cumulative Proportion Surviving at the Time |            | N of Cumulative Events | N of Remaining Cases |
|----------------------------|--------|--------|---------------------------------------------|------------|------------------------|----------------------|
|                            |        |        | Estimate                                    | Std. Error |                        |                      |
| 6                          | 30,000 | ,00    | .                                           | .          | 3                      | 7                    |
| 7                          | 30,000 | ,00    | .                                           | .          | 3                      | 6                    |
| 8                          | 30,000 | ,00    | .                                           | .          | 3                      | 5                    |
| 9                          | 30,000 | ,00    | .                                           | .          | 3                      | 4                    |
| 10                         | 30,000 | ,00    | .                                           | .          | 3                      | 3                    |
| 11                         | 30,000 | ,00    | .                                           | .          | 3                      | 2                    |
| 12                         | 30,000 | ,00    | .                                           | .          | 3                      | 1                    |
| 13                         | 30,000 | ,00    | .                                           | .          | 3                      | 0                    |

Means and Medians for Survival Time

| Multiresistant Pseudomonas | Mean <sup>a</sup> |            |                         |             | Median   |            |             |
|----------------------------|-------------------|------------|-------------------------|-------------|----------|------------|-------------|
|                            | Estimate          | Std. Error | 95% Confidence Interval |             | Estimate | Std. Error | 95% ...     |
|                            |                   |            | Lower Bound             | Upper Bound |          |            | Lower Bound |
| ,0                         | 28,023            | ,913       | 26,233                  | 29,813      | .        | .          | .           |
| 1,0                        | 25,615            | 2,412      | 20,888                  | 30,343      | .        | .          | .           |
| Overall                    | 27,474            | ,904       | 25,701                  | 29,246      | .        | .          | .           |

Means and Medians for Survival Time

| Multiresistant Pseudomonas | Median      |
|----------------------------|-------------|
|                            | 95% ...     |
|                            | Upper Bound |
| ,0                         | .           |
| 1,0                        | .           |
| Overall                    | .           |

a. Estimation is limited to the largest survival time if it is censored.

Overall Comparisons

|                       | Chi-Square | df | Sig. |
|-----------------------|------------|----|------|
| Log Rank (Mantel-Cox) | ,759       | 1  | ,384 |

Test of equality of survival distributions for the different levels of Multiresistant Pseudomonas

### Survival Functions

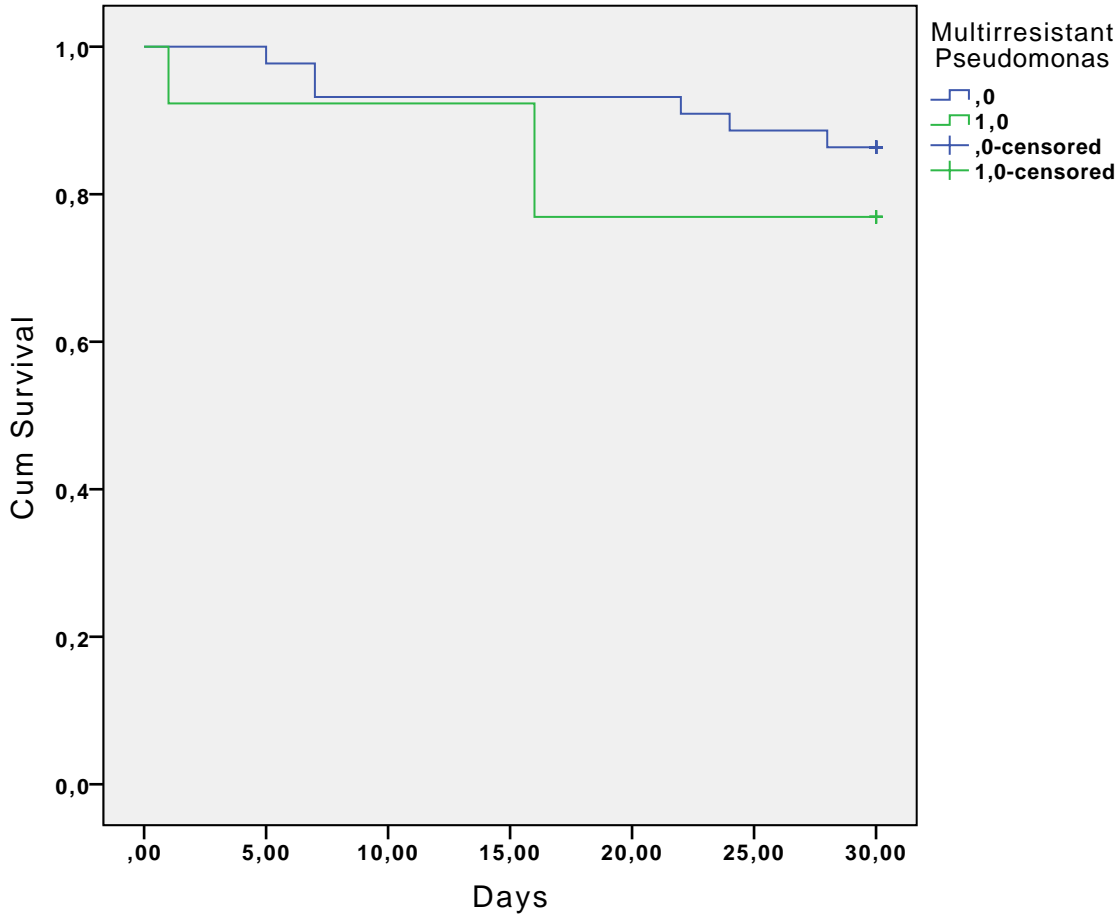

### CHARLSON INDEX>2 (0=NO, 1=YES)

#### Case Processing Summary

| Charlson Index>2 | Total N | N of Events | Censored |         |
|------------------|---------|-------------|----------|---------|
|                  |         |             | N        | Percent |
| ,00              | 23      | 2           | 21       | 91,3%   |
| 1,00             | 37      | 9           | 28       | 75,7%   |
| Overall          | 60      | 11          | 49       | 81,7%   |

Survival Table

| Charlson Index>2 | Time | Status | Cumulative Proportion Surviving at the Time |            | N of Cumulative Events | N of Remaining Cases |    |
|------------------|------|--------|---------------------------------------------|------------|------------------------|----------------------|----|
|                  |      |        | Estimate                                    | Std. Error |                        |                      |    |
| ,00              | 1    | 8,000  | 1,00                                        | ,957       | ,043                   | 1                    | 22 |
|                  | 2    | 16,000 | 1,00                                        | ,913       | ,059                   | 2                    | 21 |
|                  | 3    | 30,000 | ,00                                         | .          | .                      | 2                    | 20 |
|                  | 4    | 30,000 | ,00                                         | .          | .                      | 2                    | 19 |
|                  | 5    | 30,000 | ,00                                         | .          | .                      | 2                    | 18 |
|                  | 6    | 30,000 | ,00                                         | .          | .                      | 2                    | 17 |
|                  | 7    | 30,000 | ,00                                         | .          | .                      | 2                    | 16 |
|                  | 8    | 30,000 | ,00                                         | .          | .                      | 2                    | 15 |
|                  | 9    | 30,000 | ,00                                         | .          | .                      | 2                    | 14 |
|                  | 10   | 30,000 | ,00                                         | .          | .                      | 2                    | 13 |
|                  | 11   | 30,000 | ,00                                         | .          | .                      | 2                    | 12 |
|                  | 12   | 30,000 | ,00                                         | .          | .                      | 2                    | 11 |
|                  | 13   | 30,000 | ,00                                         | .          | .                      | 2                    | 10 |
|                  | 14   | 30,000 | ,00                                         | .          | .                      | 2                    | 9  |
|                  | 15   | 30,000 | ,00                                         | .          | .                      | 2                    | 8  |
|                  | 16   | 30,000 | ,00                                         | .          | .                      | 2                    | 7  |
|                  | 17   | 30,000 | ,00                                         | .          | .                      | 2                    | 6  |
|                  | 18   | 30,000 | ,00                                         | .          | .                      | 2                    | 5  |
|                  | 19   | 30,000 | ,00                                         | .          | .                      | 2                    | 4  |
|                  | 20   | 30,000 | ,00                                         | .          | .                      | 2                    | 3  |
|                  | 21   | 30,000 | ,00                                         | .          | .                      | 2                    | 2  |
|                  | 22   | 30,000 | ,00                                         | .          | .                      | 2                    | 1  |
|                  | 23   | 30,000 | ,00                                         | .          | .                      | 2                    | 0  |
| 1,00             | 1    | 1,000  | 1,00                                        | ,973       | ,027                   | 1                    | 36 |
|                  | 2    | 5,000  | 1,00                                        | ,946       | ,037                   | 2                    | 35 |
|                  | 3    | 7,000  | 1,00                                        | .          | .                      | 3                    | 34 |
|                  | 4    | 7,000  | 1,00                                        | ,892       | ,051                   | 4                    | 33 |
|                  | 5    | 10,000 | 1,00                                        | ,865       | ,056                   | 5                    | 32 |
|                  | 6    | 16,000 | 1,00                                        | ,838       | ,061                   | 6                    | 31 |
|                  | 7    | 22,000 | 1,00                                        | ,811       | ,064                   | 7                    | 30 |
|                  | 8    | 24,000 | 1,00                                        | ,784       | ,068                   | 8                    | 29 |
|                  | 9    | 28,000 | 1,00                                        | ,757       | ,071                   | 9                    | 28 |
|                  | 10   | 30,000 | ,00                                         | .          | .                      | 9                    | 27 |
|                  | 11   | 30,000 | ,00                                         | .          | .                      | 9                    | 26 |
|                  | 12   | 30,000 | ,00                                         | .          | .                      | 9                    | 25 |
|                  | 13   | 30,000 | ,00                                         | .          | .                      | 9                    | 24 |
|                  | 14   | 30,000 | ,00                                         | .          | .                      | 9                    | 23 |
|                  | 15   | 30,000 | ,00                                         | .          | .                      | 9                    | 22 |
|                  | 16   | 30,000 | ,00                                         | .          | .                      | 9                    | 21 |
|                  | 17   | 30,000 | ,00                                         | .          | .                      | 9                    | 20 |
|                  | 18   | 30,000 | ,00                                         | .          | .                      | 9                    | 19 |
|                  | 19   | 30,000 | ,00                                         | .          | .                      | 9                    | 18 |
|                  | 20   | 30,000 | ,00                                         | .          | .                      | 9                    | 17 |
|                  | 21   | 30,000 | ,00                                         | .          | .                      | 9                    | 16 |
|                  | 22   | 30,000 | ,00                                         | .          | .                      | 9                    | 15 |
|                  | 23   | 30,000 | ,00                                         | .          | .                      | 9                    | 14 |
|                  | 24   | 30,000 | ,00                                         | .          | .                      | 9                    | 13 |
|                  | 25   | 30,000 | ,00                                         | .          | .                      | 9                    | 12 |
|                  | 26   | 30,000 | ,00                                         | .          | .                      | 9                    | 11 |

**Survival Table**

| Charlson Index>2 | Time   | Status | Cumulative Proportion Surviving at the Time |            | N of Cumulative Events | N of Remaining Cases |
|------------------|--------|--------|---------------------------------------------|------------|------------------------|----------------------|
|                  |        |        | Estimate                                    | Std. Error |                        |                      |
| 27               | 30,000 | ,00    | .                                           | .          | 9                      | 10                   |
| 28               | 30,000 | ,00    | .                                           | .          | 9                      | 9                    |
| 29               | 30,000 | ,00    | .                                           | .          | 9                      | 8                    |
| 30               | 30,000 | ,00    | .                                           | .          | 9                      | 7                    |
| 31               | 30,000 | ,00    | .                                           | .          | 9                      | 6                    |
| 32               | 30,000 | ,00    | .                                           | .          | 9                      | 5                    |
| 33               | 30,000 | ,00    | .                                           | .          | 9                      | 4                    |
| 34               | 30,000 | ,00    | .                                           | .          | 9                      | 3                    |
| 35               | 30,000 | ,00    | .                                           | .          | 9                      | 2                    |
| 36               | 30,000 | ,00    | .                                           | .          | 9                      | 1                    |
| 37               | 30,000 | ,00    | .                                           | .          | 9                      | 0                    |

**Means and Medians for Survival Time**

| Charlson Index>2 | Mean <sup>a</sup> |            |                         |             | Median   |            |             |
|------------------|-------------------|------------|-------------------------|-------------|----------|------------|-------------|
|                  | Estimate          | Std. Error | 95% Confidence Interval |             | Estimate | Std. Error | 95% ...     |
|                  |                   |            | Lower Bound             | Upper Bound |          |            | Lower Bound |
| ,00              | 28,435            | 1,086      | 26,307                  | 30,563      | .        | .          | .           |
| 1,00             | 25,946            | 1,382      | 23,237                  | 28,655      | .        | .          | .           |
| Overall          | 26,900            | ,961       | 25,016                  | 28,784      | .        | .          | .           |

**Means and Medians for Survival Time**

| Charlson Index>2 | Median      |
|------------------|-------------|
|                  | 95% ...     |
|                  | Upper Bound |
| ,00              | .           |
| 1,00             | .           |
| Overall          | .           |

a. Estimation is limited to the largest survival time if it is censored.

**Overall Comparisons**

|                       | Chi-Square | df | Sig. |
|-----------------------|------------|----|------|
| Log Rank (Mantel-Cox) | 2,243      | 1  | ,134 |

Test of equality of survival distributions for the different levels of Charlson Index>2

Survival Functions

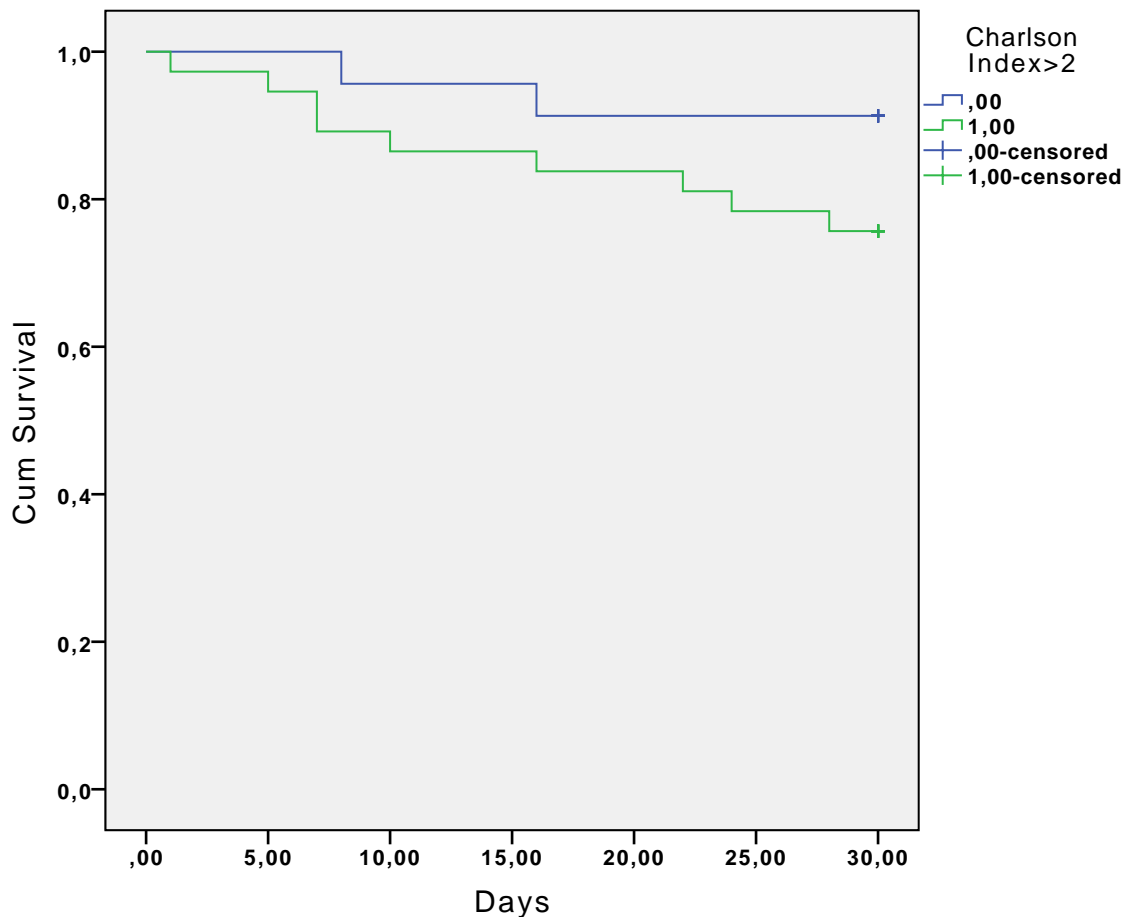

**NOSOCOMIAL AND HEALTHCARE ASSOCIATED (0=NO, 1=YES)**

Case Processing Summary

| Nosocomial and Healthcare Associated | Total N | N of Events | Censored |         |
|--------------------------------------|---------|-------------|----------|---------|
|                                      |         |             | N        | Percent |
| ,00                                  | 14      | 1           | 13       | 92,9%   |
| 1,00                                 | 46      | 9           | 37       | 80,4%   |
| Overall                              | 60      | 10          | 50       | 83,3%   |

Survival Table

| Nosocomial and Healthcare Associated | Time | Status | Cumulative Proportion Surviving at the Time |            | N of Cumulative Events |   |
|--------------------------------------|------|--------|---------------------------------------------|------------|------------------------|---|
|                                      |      |        | Estimate                                    | Std. Error |                        |   |
| ,00                                  | 1    | 22,000 | 1,00                                        | ,929       | ,069                   | 1 |
|                                      | 2    | 30,000 | ,00                                         | .          | .                      | 1 |
|                                      | 3    | 30,000 | ,00                                         | .          | .                      | 1 |
|                                      | 4    | 30,000 | ,00                                         | .          | .                      | 1 |
|                                      | 5    | 30,000 | ,00                                         | .          | .                      | 1 |
|                                      | 6    | 30,000 | ,00                                         | .          | .                      | 1 |
|                                      | 7    | 30,000 | ,00                                         | .          | .                      | 1 |
|                                      | 8    | 30,000 | ,00                                         | .          | .                      | 1 |
|                                      | 9    | 30,000 | ,00                                         | .          | .                      | 1 |
|                                      | 10   | 30,000 | ,00                                         | .          | .                      | 1 |
|                                      | 11   | 30,000 | ,00                                         | .          | .                      | 1 |
|                                      | 12   | 30,000 | ,00                                         | .          | .                      | 1 |
|                                      | 13   | 30,000 | ,00                                         | .          | .                      | 1 |
|                                      | 14   | 30,000 | ,00                                         | .          | .                      | 1 |
| 1,00                                 | 1    | 1,000  | 1,00                                        | ,978       | ,022                   | 1 |
|                                      | 2    | 7,000  | 1,00                                        | .          | .                      | 2 |
|                                      | 3    | 7,000  | 1,00                                        | ,935       | ,036                   | 3 |
|                                      | 4    | 8,000  | 1,00                                        | ,913       | ,042                   | 4 |
|                                      | 5    | 10,000 | 1,00                                        | ,891       | ,046                   | 5 |
|                                      | 6    | 16,000 | 1,00                                        | .          | .                      | 6 |
|                                      | 7    | 16,000 | 1,00                                        | ,848       | ,053                   | 7 |
|                                      | 8    | 24,000 | 1,00                                        | ,826       | ,056                   | 8 |
|                                      | 9    | 28,000 | 1,00                                        | ,804       | ,058                   | 9 |
|                                      | 10   | 30,000 | ,00                                         | .          | .                      | 9 |
|                                      | 11   | 30,000 | ,00                                         | .          | .                      | 9 |
|                                      | 12   | 30,000 | ,00                                         | .          | .                      | 9 |
|                                      | 13   | 30,000 | ,00                                         | .          | .                      | 9 |
|                                      | 14   | 30,000 | ,00                                         | .          | .                      | 9 |
|                                      | 15   | 30,000 | ,00                                         | .          | .                      | 9 |
|                                      | 16   | 30,000 | ,00                                         | .          | .                      | 9 |
|                                      | 17   | 30,000 | ,00                                         | .          | .                      | 9 |
|                                      | 18   | 30,000 | ,00                                         | .          | .                      | 9 |
|                                      | 19   | 30,000 | ,00                                         | .          | .                      | 9 |
|                                      | 20   | 30,000 | ,00                                         | .          | .                      | 9 |
|                                      | 21   | 30,000 | ,00                                         | .          | .                      | 9 |
|                                      | 22   | 30,000 | ,00                                         | .          | .                      | 9 |
|                                      | 23   | 30,000 | ,00                                         | .          | .                      | 9 |
|                                      | 24   | 30,000 | ,00                                         | .          | .                      | 9 |
|                                      | 25   | 30,000 | ,00                                         | .          | .                      | 9 |
|                                      | 26   | 30,000 | ,00                                         | .          | .                      | 9 |
|                                      | 27   | 30,000 | ,00                                         | .          | .                      | 9 |
|                                      | 28   | 30,000 | ,00                                         | .          | .                      | 9 |
|                                      | 29   | 30,000 | ,00                                         | .          | .                      | 9 |
|                                      | 30   | 30,000 | ,00                                         | .          | .                      | 9 |
|                                      | 31   | 30,000 | ,00                                         | .          | .                      | 9 |
|                                      | 32   | 30,000 | ,00                                         | .          | .                      | 9 |
|                                      | 33   | 30,000 | ,00                                         | .          | .                      | 9 |
|                                      | 34   | 30,000 | ,00                                         | .          | .                      | 9 |
|                                      | 35   | 30,000 | ,00                                         | .          | .                      | 9 |

Survival Table

|                                             |    | N of Remaining Cases |
|---------------------------------------------|----|----------------------|
| <b>Nosocomial and Healthcare Associated</b> |    |                      |
| <b>,00</b>                                  | 1  | 13                   |
|                                             | 2  | 12                   |
|                                             | 3  | 11                   |
|                                             | 4  | 10                   |
|                                             | 5  | 9                    |
|                                             | 6  | 8                    |
|                                             | 7  | 7                    |
|                                             | 8  | 6                    |
|                                             | 9  | 5                    |
|                                             | 10 | 4                    |
|                                             | 11 | 3                    |
|                                             | 12 | 2                    |
|                                             | 13 | 1                    |
|                                             | 14 | 0                    |
| <b>1,00</b>                                 | 1  | 45                   |
|                                             | 2  | 44                   |
|                                             | 3  | 43                   |
|                                             | 4  | 42                   |
|                                             | 5  | 41                   |
|                                             | 6  | 40                   |
|                                             | 7  | 39                   |
|                                             | 8  | 38                   |
|                                             | 9  | 37                   |
|                                             | 10 | 36                   |
|                                             | 11 | 35                   |
|                                             | 12 | 34                   |
|                                             | 13 | 33                   |
|                                             | 14 | 32                   |
|                                             | 15 | 31                   |
|                                             | 16 | 30                   |
|                                             | 17 | 29                   |
|                                             | 18 | 28                   |
|                                             | 19 | 27                   |
|                                             | 20 | 26                   |
|                                             | 21 | 25                   |
|                                             | 22 | 24                   |
|                                             | 23 | 23                   |
|                                             | 24 | 22                   |
|                                             | 25 | 21                   |
|                                             | 26 | 20                   |
|                                             | 27 | 19                   |
|                                             | 28 | 18                   |
|                                             | 29 | 17                   |
|                                             | 30 | 16                   |
|                                             | 31 | 15                   |
|                                             | 32 | 14                   |
|                                             | 33 | 13                   |
|                                             | 34 | 12                   |
|                                             | 35 | 11                   |

Survival Table

| Nosocomial and Healthcare Associated | Time   | Status | Cumulative Proportion Surviving at the Time |            | N of Cumulative Events |
|--------------------------------------|--------|--------|---------------------------------------------|------------|------------------------|
|                                      |        |        | Estimate                                    | Std. Error |                        |
| 36                                   | 30,000 | ,00    | .                                           | .          | 9                      |
| 37                                   | 30,000 | ,00    | .                                           | .          | 9                      |
| 38                                   | 30,000 | ,00    | .                                           | .          | 9                      |
| 39                                   | 30,000 | ,00    | .                                           | .          | 9                      |
| 40                                   | 30,000 | ,00    | .                                           | .          | 9                      |
| 41                                   | 30,000 | ,00    | .                                           | .          | 9                      |
| 42                                   | 30,000 | ,00    | .                                           | .          | 9                      |
| 43                                   | 30,000 | ,00    | .                                           | .          | 9                      |
| 44                                   | 30,000 | ,00    | .                                           | .          | 9                      |
| 45                                   | 30,000 | ,00    | .                                           | .          | 9                      |
| 46                                   | 30,000 | ,00    | .                                           | .          | 9                      |

Survival Table

| Nosocomial and Healthcare Associated | N of Remaining Cases |
|--------------------------------------|----------------------|
| 36                                   | 10                   |
| 37                                   | 9                    |
| 38                                   | 8                    |
| 39                                   | 7                    |
| 40                                   | 6                    |
| 41                                   | 5                    |
| 42                                   | 4                    |
| 43                                   | 3                    |
| 44                                   | 2                    |
| 45                                   | 1                    |
| 46                                   | 0                    |

Means and Medians for Survival Time

| Nosocomial and Healthcare Associated | Mean <sup>a</sup> |            |                         |             | Median   |            |             |
|--------------------------------------|-------------------|------------|-------------------------|-------------|----------|------------|-------------|
|                                      | Estimate          | Std. Error | 95% Confidence Interval |             | Estimate | Std. Error | 95% ...     |
|                                      |                   |            | Lower Bound             | Upper Bound |          |            | Lower Bound |
| ,00                                  | 29,429            | ,551       | 28,349                  | 30,508      | .        | .          | .           |
| 1,00                                 | 26,674            | 1,131      | 24,457                  | 28,890      | .        | .          | .           |
| Overall                              | 27,317            | ,889       | 25,574                  | 29,060      | .        | .          | .           |

Means and Medians for Survival Time

| Nosocomial and Healthcare Associated | Median      |
|--------------------------------------|-------------|
|                                      | 95% ...     |
|                                      | Upper Bound |
| ,00                                  | .           |
| 1,00                                 | .           |
| Overall                              | .           |

a. Estimation is limited to the largest survival time if it is censored.



Overall Comparisons

|                       | Chi-Square | df | Sig. |
|-----------------------|------------|----|------|
| Log Rank (Mantel-Cox) | 1,186      | 1  | ,276 |

Test of equality of survival distributions for the different levels of Nosocomial and Healthcare Associated

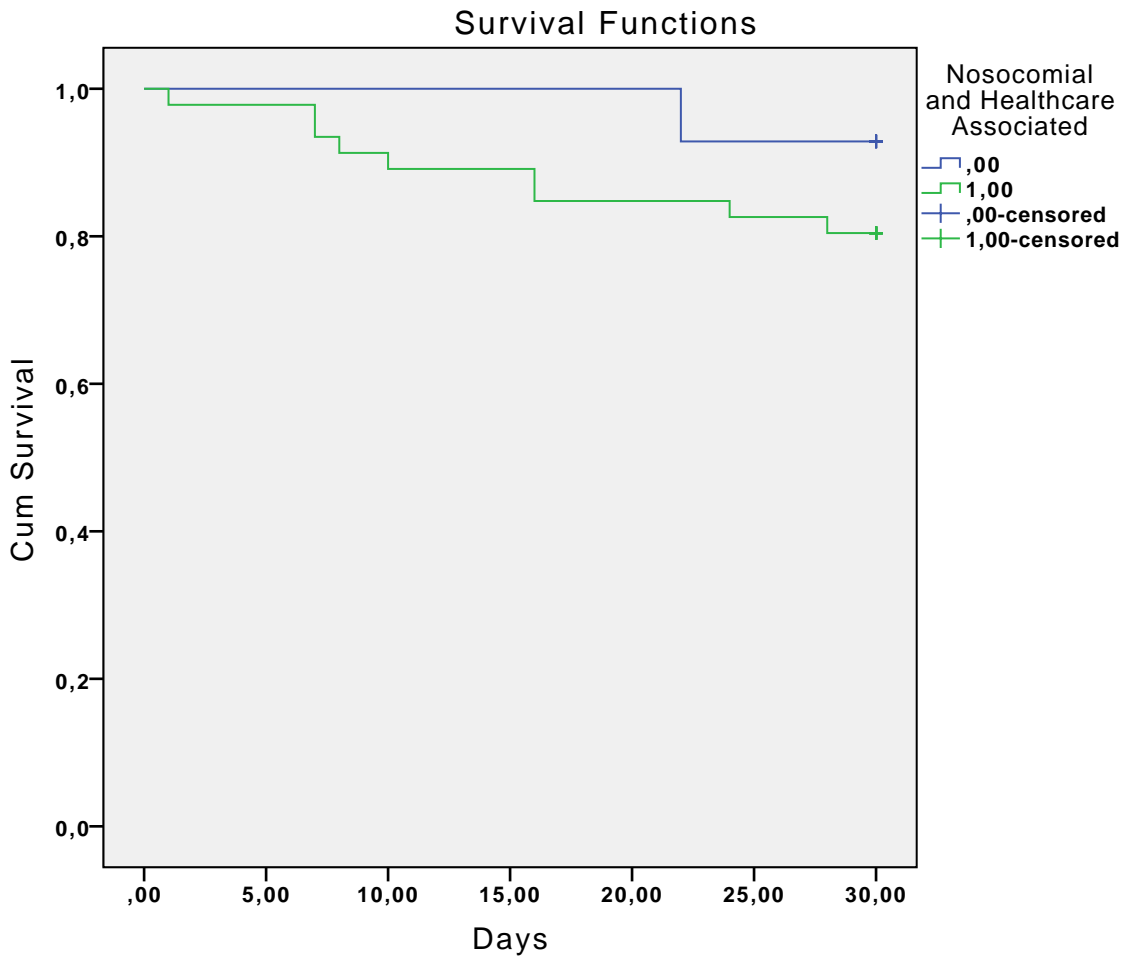

**AGE>65 YEARS (0=NO, 1=YES)**

Case Processing Summary

| Age>65 years | Total N | N of Events | Censored |         |
|--------------|---------|-------------|----------|---------|
|              |         |             | N        | Percent |
| ,00          | 12      | 1           | 11       | 91,7%   |
| 1,00         | 50      | 10          | 40       | 80,0%   |
| Overall      | 62      | 11          | 51       | 82,3%   |

Survival Table

| Age>65 years | Time | Status | Cumulative Proportion Surviving at the Time |            | N of Cumulative Events | N of Remaining Cases |
|--------------|------|--------|---------------------------------------------|------------|------------------------|----------------------|
|              |      |        | Estimate                                    | Std. Error |                        |                      |
| ,00          | 1    | 1,00   | ,917                                        | ,080       | 1                      | 11                   |
|              | 2    | ,00    | .                                           | .          | 1                      | 10                   |
|              | 3    | ,00    | .                                           | .          | 1                      | 9                    |
|              | 4    | ,00    | .                                           | .          | 1                      | 8                    |
|              | 5    | ,00    | .                                           | .          | 1                      | 7                    |
|              | 6    | ,00    | .                                           | .          | 1                      | 6                    |
|              | 7    | ,00    | .                                           | .          | 1                      | 5                    |
|              | 8    | ,00    | .                                           | .          | 1                      | 4                    |
|              | 9    | ,00    | .                                           | .          | 1                      | 3                    |
|              | 10   | ,00    | .                                           | .          | 1                      | 2                    |
|              | 11   | ,00    | .                                           | .          | 1                      | 1                    |
|              | 12   | ,00    | .                                           | .          | 1                      | 0                    |
| 1,00         | 1    | 1,00   | ,980                                        | ,020       | 1                      | 49                   |
|              | 2    | 1,00   | .                                           | .          | 2                      | 48                   |
|              | 3    | 1,00   | ,940                                        | ,034       | 3                      | 47                   |
|              | 4    | 1,00   | ,920                                        | ,038       | 4                      | 46                   |
|              | 5    | 1,00   | ,900                                        | ,042       | 5                      | 45                   |
|              | 6    | 1,00   | .                                           | .          | 6                      | 44                   |
|              | 7    | 1,00   | ,860                                        | ,049       | 7                      | 43                   |
|              | 8    | 1,00   | ,840                                        | ,052       | 8                      | 42                   |
|              | 9    | 1,00   | ,820                                        | ,054       | 9                      | 41                   |
|              | 10   | 1,00   | ,800                                        | ,057       | 10                     | 40                   |
|              | 11   | ,00    | .                                           | .          | 10                     | 39                   |
|              | 12   | ,00    | .                                           | .          | 10                     | 38                   |
|              | 13   | ,00    | .                                           | .          | 10                     | 37                   |
|              | 14   | ,00    | .                                           | .          | 10                     | 36                   |
|              | 15   | ,00    | .                                           | .          | 10                     | 35                   |
|              | 16   | ,00    | .                                           | .          | 10                     | 34                   |
|              | 17   | ,00    | .                                           | .          | 10                     | 33                   |
|              | 18   | ,00    | .                                           | .          | 10                     | 32                   |
|              | 19   | ,00    | .                                           | .          | 10                     | 31                   |
|              | 20   | ,00    | .                                           | .          | 10                     | 30                   |
|              | 21   | ,00    | .                                           | .          | 10                     | 29                   |
|              | 22   | ,00    | .                                           | .          | 10                     | 28                   |
|              | 23   | ,00    | .                                           | .          | 10                     | 27                   |
|              | 24   | ,00    | .                                           | .          | 10                     | 26                   |
|              | 25   | ,00    | .                                           | .          | 10                     | 25                   |
|              | 26   | ,00    | .                                           | .          | 10                     | 24                   |
|              | 27   | ,00    | .                                           | .          | 10                     | 23                   |
|              | 28   | ,00    | .                                           | .          | 10                     | 22                   |
|              | 29   | ,00    | .                                           | .          | 10                     | 21                   |
|              | 30   | ,00    | .                                           | .          | 10                     | 20                   |
|              | 31   | ,00    | .                                           | .          | 10                     | 19                   |
|              | 32   | ,00    | .                                           | .          | 10                     | 18                   |
|              | 33   | ,00    | .                                           | .          | 10                     | 17                   |
|              | 34   | ,00    | .                                           | .          | 10                     | 16                   |
|              | 35   | ,00    | .                                           | .          | 10                     | 15                   |
|              | 36   | ,00    | .                                           | .          | 10                     | 14                   |
|              | 37   | ,00    | .                                           | .          | 10                     | 13                   |

**Survival Table**

| Age>65 years | Time   | Status | Cumulative Proportion Surviving at the Time |            | N of Cumulative Events | N of Remaining Cases |
|--------------|--------|--------|---------------------------------------------|------------|------------------------|----------------------|
|              |        |        | Estimate                                    | Std. Error |                        |                      |
| 38           | 30,000 | ,00    | .                                           | .          | 10                     | 12                   |
| 39           | 30,000 | ,00    | .                                           | .          | 10                     | 11                   |
| 40           | 30,000 | ,00    | .                                           | .          | 10                     | 10                   |
| 41           | 30,000 | ,00    | .                                           | .          | 10                     | 9                    |
| 42           | 30,000 | ,00    | .                                           | .          | 10                     | 8                    |
| 43           | 30,000 | ,00    | .                                           | .          | 10                     | 7                    |
| 44           | 30,000 | ,00    | .                                           | .          | 10                     | 6                    |
| 45           | 30,000 | ,00    | .                                           | .          | 10                     | 5                    |
| 46           | 30,000 | ,00    | .                                           | .          | 10                     | 4                    |
| 47           | 30,000 | ,00    | .                                           | .          | 10                     | 3                    |
| 48           | 30,000 | ,00    | .                                           | .          | 10                     | 2                    |
| 49           | 30,000 | ,00    | .                                           | .          | 10                     | 1                    |
| 50           | 30,000 | ,00    | .                                           | .          | 10                     | 0                    |

**Means and Medians for Survival Time**

| Age>65 years | Mean <sup>a</sup> |            |                         |             | Median   |            |             |
|--------------|-------------------|------------|-------------------------|-------------|----------|------------|-------------|
|              | Estimate          | Std. Error | 95% Confidence Interval |             | Estimate | Std. Error | 95% ...     |
|              |                   |            | Lower Bound             | Upper Bound |          |            | Lower Bound |
| ,00          | 27,917            | 1,995      | 24,007                  | 31,826      | .        | .          | .           |
| 1,00         | 26,780            | 1,051      | 24,720                  | 28,840      | .        | .          | .           |
| Overall      | 27,000            | ,933       | 25,171                  | 28,829      | .        | .          | .           |

**Means and Medians for Survival Time**

| Age>65 years | Median      |
|--------------|-------------|
|              | 95% ...     |
|              | Upper Bound |
| ,00          | .           |
| 1,00         | .           |
| Overall      | .           |

a. Estimation is limited to the largest survival time if it is censored.

**Overall Comparisons**

|                       | Chi-Square | df | Sig. |
|-----------------------|------------|----|------|
| Log Rank (Mantel-Cox) | ,775       | 1  | ,379 |

Test of equality of survival distributions for the different levels of Age>65 years

### Survival Functions

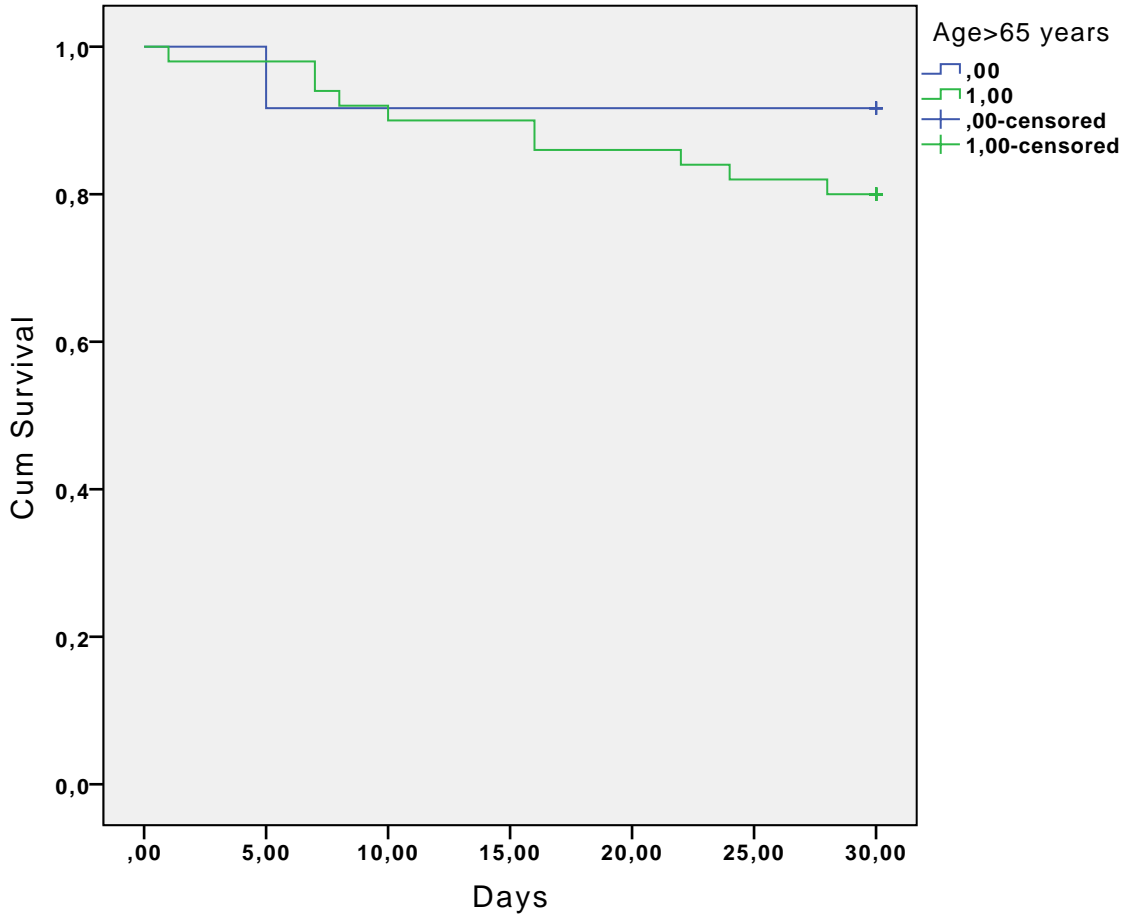

### AGE > 75 YEARS (0=NO, 1=YES)

Case Processing Summary

| Age > 75 years | Total N | N of Events | Censored |         |
|----------------|---------|-------------|----------|---------|
|                |         |             | N        | Percent |
| 0,00           | 26      | 2           | 24       | 92,3%   |
| 1,00           | 36      | 9           | 27       | 75,0%   |
| Overall        | 62      | 11          | 51       | 82,3%   |

Survival Table

| Age>75 years | Time | Status | Cumulative Proportion Surviving at the Time |            | N of Cumulative Events | N of Remaining Cases |    |
|--------------|------|--------|---------------------------------------------|------------|------------------------|----------------------|----|
|              |      |        | Estimate                                    | Std. Error |                        |                      |    |
| ,00          | 1    | 5,000  | 1,00                                        | ,962       | ,038                   | 1                    | 25 |
|              | 2    | 10,000 | 1,00                                        | ,923       | ,052                   | 2                    | 24 |
|              | 3    | 30,000 | ,00                                         | .          | .                      | 2                    | 23 |
|              | 4    | 30,000 | ,00                                         | .          | .                      | 2                    | 22 |
|              | 5    | 30,000 | ,00                                         | .          | .                      | 2                    | 21 |
|              | 6    | 30,000 | ,00                                         | .          | .                      | 2                    | 20 |
|              | 7    | 30,000 | ,00                                         | .          | .                      | 2                    | 19 |
|              | 8    | 30,000 | ,00                                         | .          | .                      | 2                    | 18 |
|              | 9    | 30,000 | ,00                                         | .          | .                      | 2                    | 17 |
|              | 10   | 30,000 | ,00                                         | .          | .                      | 2                    | 16 |
|              | 11   | 30,000 | ,00                                         | .          | .                      | 2                    | 15 |
|              | 12   | 30,000 | ,00                                         | .          | .                      | 2                    | 14 |
|              | 13   | 30,000 | ,00                                         | .          | .                      | 2                    | 13 |
|              | 14   | 30,000 | ,00                                         | .          | .                      | 2                    | 12 |
|              | 15   | 30,000 | ,00                                         | .          | .                      | 2                    | 11 |
|              | 16   | 30,000 | ,00                                         | .          | .                      | 2                    | 10 |
|              | 17   | 30,000 | ,00                                         | .          | .                      | 2                    | 9  |
|              | 18   | 30,000 | ,00                                         | .          | .                      | 2                    | 8  |
|              | 19   | 30,000 | ,00                                         | .          | .                      | 2                    | 7  |
|              | 20   | 30,000 | ,00                                         | .          | .                      | 2                    | 6  |
|              | 21   | 30,000 | ,00                                         | .          | .                      | 2                    | 5  |
|              | 22   | 30,000 | ,00                                         | .          | .                      | 2                    | 4  |
|              | 23   | 30,000 | ,00                                         | .          | .                      | 2                    | 3  |
|              | 24   | 30,000 | ,00                                         | .          | .                      | 2                    | 2  |
|              | 25   | 30,000 | ,00                                         | .          | .                      | 2                    | 1  |
|              | 26   | 30,000 | ,00                                         | .          | .                      | 2                    | 0  |
| 1,00         | 1    | 1,000  | 1,00                                        | ,972       | ,027                   | 1                    | 35 |
|              | 2    | 7,000  | 1,00                                        | .          | .                      | 2                    | 34 |
|              | 3    | 7,000  | 1,00                                        | ,917       | ,046                   | 3                    | 33 |
|              | 4    | 8,000  | 1,00                                        | ,889       | ,052                   | 4                    | 32 |
|              | 5    | 16,000 | 1,00                                        | .          | .                      | 5                    | 31 |
|              | 6    | 16,000 | 1,00                                        | ,833       | ,062                   | 6                    | 30 |
|              | 7    | 22,000 | 1,00                                        | ,806       | ,066                   | 7                    | 29 |
|              | 8    | 24,000 | 1,00                                        | ,778       | ,069                   | 8                    | 28 |
|              | 9    | 28,000 | 1,00                                        | ,750       | ,072                   | 9                    | 27 |
|              | 10   | 30,000 | ,00                                         | .          | .                      | 9                    | 26 |
|              | 11   | 30,000 | ,00                                         | .          | .                      | 9                    | 25 |
|              | 12   | 30,000 | ,00                                         | .          | .                      | 9                    | 24 |
|              | 13   | 30,000 | ,00                                         | .          | .                      | 9                    | 23 |
|              | 14   | 30,000 | ,00                                         | .          | .                      | 9                    | 22 |
|              | 15   | 30,000 | ,00                                         | .          | .                      | 9                    | 21 |
|              | 16   | 30,000 | ,00                                         | .          | .                      | 9                    | 20 |
|              | 17   | 30,000 | ,00                                         | .          | .                      | 9                    | 19 |
|              | 18   | 30,000 | ,00                                         | .          | .                      | 9                    | 18 |
|              | 19   | 30,000 | ,00                                         | .          | .                      | 9                    | 17 |
|              | 20   | 30,000 | ,00                                         | .          | .                      | 9                    | 16 |
|              | 21   | 30,000 | ,00                                         | .          | .                      | 9                    | 15 |
|              | 22   | 30,000 | ,00                                         | .          | .                      | 9                    | 14 |
|              | 23   | 30,000 | ,00                                         | .          | .                      | 9                    | 13 |

**Survival Table**

| Age>75 years | Time   | Status | Cumulative Proportion Surviving at the Time |            | N of Cumulative Events | N of Remaining Cases |
|--------------|--------|--------|---------------------------------------------|------------|------------------------|----------------------|
|              |        |        | Estimate                                    | Std. Error |                        |                      |
| 24           | 30,000 | ,00    | .                                           | .          | 9                      | 12                   |
| 25           | 30,000 | ,00    | .                                           | .          | 9                      | 11                   |
| 26           | 30,000 | ,00    | .                                           | .          | 9                      | 10                   |
| 27           | 30,000 | ,00    | .                                           | .          | 9                      | 9                    |
| 28           | 30,000 | ,00    | .                                           | .          | 9                      | 8                    |
| 29           | 30,000 | ,00    | .                                           | .          | 9                      | 7                    |
| 30           | 30,000 | ,00    | .                                           | .          | 9                      | 6                    |
| 31           | 30,000 | ,00    | .                                           | .          | 9                      | 5                    |
| 32           | 30,000 | ,00    | .                                           | .          | 9                      | 4                    |
| 33           | 30,000 | ,00    | .                                           | .          | 9                      | 3                    |
| 34           | 30,000 | ,00    | .                                           | .          | 9                      | 2                    |
| 35           | 30,000 | ,00    | .                                           | .          | 9                      | 1                    |
| 36           | 30,000 | ,00    | .                                           | .          | 9                      | 0                    |

**Means and Medians for Survival Time**

| Age>75 years | Mean <sup>a</sup> |            |                         |             | Median   |            |             |
|--------------|-------------------|------------|-------------------------|-------------|----------|------------|-------------|
|              | Estimate          | Std. Error | 95% Confidence Interval |             | Estimate | Std. Error | 95% ...     |
|              |                   |            | Lower Bound             | Upper Bound |          |            | Lower Bound |
| ,00          | 28,269            | 1,184      | 25,949                  | 30,589      | .        | .          | .           |
| 1,00         | 26,083            | 1,340      | 23,457                  | 28,710      | .        | .          | .           |
| Overall      | 27,000            | ,933       | 25,171                  | 28,829      | .        | .          | .           |

**Means and Medians for Survival Time**

| Age>75 years | Median      |
|--------------|-------------|
|              | 95% ...     |
|              | Upper Bound |
| ,00          | .           |
| 1,00         | .           |
| Overall      | .           |

a. Estimation is limited to the largest survival time if it is censored.

**Overall Comparisons**

|                       | Chi-Square | df | Sig. |
|-----------------------|------------|----|------|
| Log Rank (Mantel-Cox) | 2,850      | 1  | ,091 |

Test of equality of survival distributions for the different levels of Age>75 years

### Survival Functions

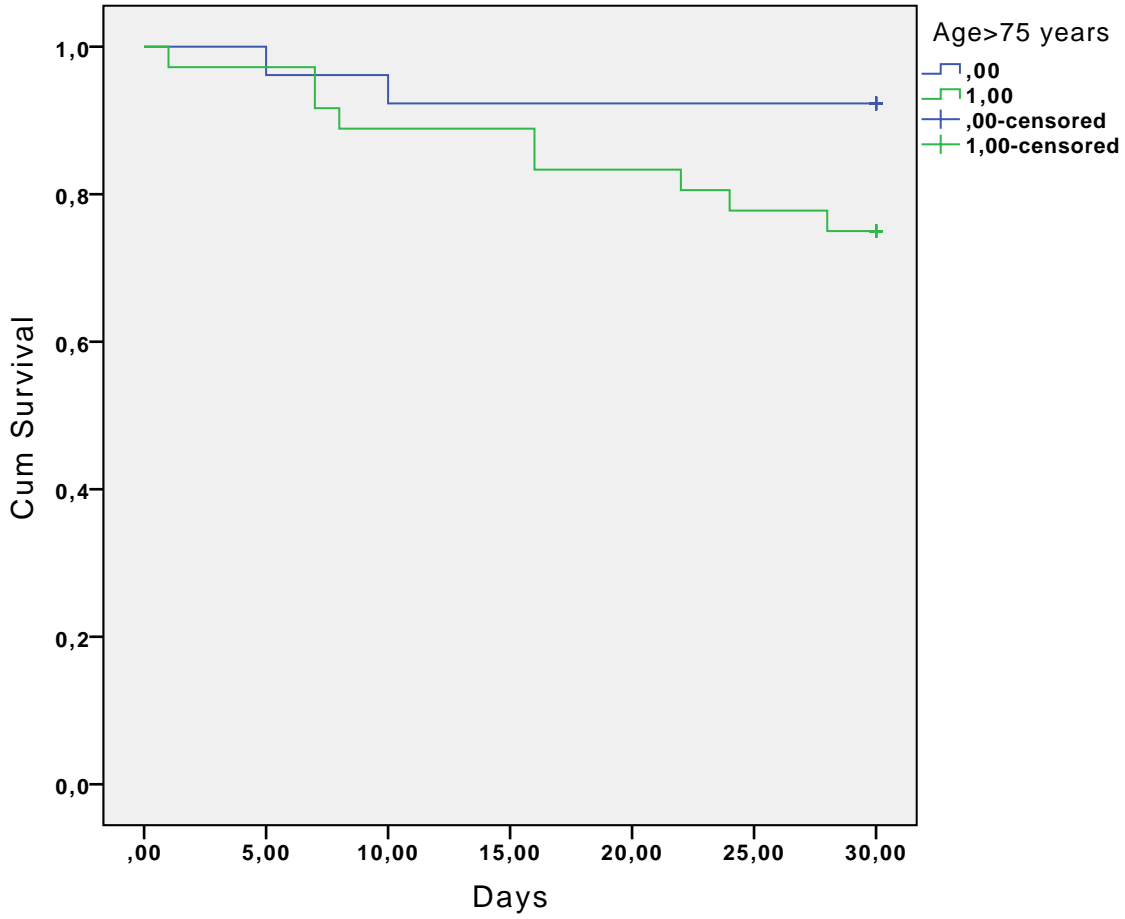

### SEBERE SEPSIS/SEPTIC SHOCK (0=NO, 1=YES)

Case Processing Summary

| Severe Sepsis/Septic Shock | Total N | N of Events | Censored |         |
|----------------------------|---------|-------------|----------|---------|
|                            |         |             | N        | Percent |
| 0,00                       | 57      | 8           | 49       | 86,0%   |
| 1,00                       | 5       | 3           | 2        | 40,0%   |
| Overall                    | 62      | 11          | 51       | 82,3%   |

Survival Table

| Severe Sepsis/Septic Shock | Time | Status | Cumulative Proportion Surviving at the Time |            | N of Cumulative Events | N of Remaining Cases |
|----------------------------|------|--------|---------------------------------------------|------------|------------------------|----------------------|
|                            |      |        | Estimate                                    | Std. Error |                        |                      |
| ,00                        | 1    | 1,00   | ,982                                        | ,017       | 1                      | 56                   |
|                            | 2    | 1,00   | .                                           | .          | 2                      | 55                   |
|                            | 3    | 1,00   | ,947                                        | ,030       | 3                      | 54                   |
|                            | 4    | 1,00   | .                                           | .          | 4                      | 53                   |
|                            | 5    | 1,00   | ,912                                        | ,037       | 5                      | 52                   |
|                            | 6    | 1,00   | ,895                                        | ,041       | 6                      | 51                   |
|                            | 7    | 1,00   | ,877                                        | ,043       | 7                      | 50                   |
|                            | 8    | 1,00   | ,860                                        | ,046       | 8                      | 49                   |
|                            | 9    | ,00    | .                                           | .          | 8                      | 48                   |
|                            | 10   | ,00    | .                                           | .          | 8                      | 47                   |
|                            | 11   | ,00    | .                                           | .          | 8                      | 46                   |
|                            | 12   | ,00    | .                                           | .          | 8                      | 45                   |
|                            | 13   | ,00    | .                                           | .          | 8                      | 44                   |
|                            | 14   | ,00    | .                                           | .          | 8                      | 43                   |
|                            | 15   | ,00    | .                                           | .          | 8                      | 42                   |
|                            | 16   | ,00    | .                                           | .          | 8                      | 41                   |
|                            | 17   | ,00    | .                                           | .          | 8                      | 40                   |
|                            | 18   | ,00    | .                                           | .          | 8                      | 39                   |
|                            | 19   | ,00    | .                                           | .          | 8                      | 38                   |
|                            | 20   | ,00    | .                                           | .          | 8                      | 37                   |
|                            | 21   | ,00    | .                                           | .          | 8                      | 36                   |
|                            | 22   | ,00    | .                                           | .          | 8                      | 35                   |
|                            | 23   | ,00    | .                                           | .          | 8                      | 34                   |
|                            | 24   | ,00    | .                                           | .          | 8                      | 33                   |
|                            | 25   | ,00    | .                                           | .          | 8                      | 32                   |
|                            | 26   | ,00    | .                                           | .          | 8                      | 31                   |
|                            | 27   | ,00    | .                                           | .          | 8                      | 30                   |
|                            | 28   | ,00    | .                                           | .          | 8                      | 29                   |
|                            | 29   | ,00    | .                                           | .          | 8                      | 28                   |
|                            | 30   | ,00    | .                                           | .          | 8                      | 27                   |
|                            | 31   | ,00    | .                                           | .          | 8                      | 26                   |
|                            | 32   | ,00    | .                                           | .          | 8                      | 25                   |
|                            | 33   | ,00    | .                                           | .          | 8                      | 24                   |
|                            | 34   | ,00    | .                                           | .          | 8                      | 23                   |
|                            | 35   | ,00    | .                                           | .          | 8                      | 22                   |
|                            | 36   | ,00    | .                                           | .          | 8                      | 21                   |
|                            | 37   | ,00    | .                                           | .          | 8                      | 20                   |
|                            | 38   | ,00    | .                                           | .          | 8                      | 19                   |
|                            | 39   | ,00    | .                                           | .          | 8                      | 18                   |
|                            | 40   | ,00    | .                                           | .          | 8                      | 17                   |
|                            | 41   | ,00    | .                                           | .          | 8                      | 16                   |
|                            | 42   | ,00    | .                                           | .          | 8                      | 15                   |
|                            | 43   | ,00    | .                                           | .          | 8                      | 14                   |
|                            | 44   | ,00    | .                                           | .          | 8                      | 13                   |
|                            | 45   | ,00    | .                                           | .          | 8                      | 12                   |
|                            | 46   | ,00    | .                                           | .          | 8                      | 11                   |
|                            | 47   | ,00    | .                                           | .          | 8                      | 10                   |
|                            | 48   | ,00    | .                                           | .          | 8                      | 9                    |
|                            | 49   | ,00    | .                                           | .          | 8                      | 8                    |



Survival Table

| Severe Sepsis/Septic Shock | Time   | Status | Cumulative Proportion Surviving at the Time |            | N of Cumulative Events | N of Remaining Cases |
|----------------------------|--------|--------|---------------------------------------------|------------|------------------------|----------------------|
|                            |        |        | Estimate                                    | Std. Error |                        |                      |
| 50                         | 30,000 | ,00    | .                                           | .          | 8                      | 7                    |
| 51                         | 30,000 | ,00    | .                                           | .          | 8                      | 6                    |
| 52                         | 30,000 | ,00    | .                                           | .          | 8                      | 5                    |
| 53                         | 30,000 | ,00    | .                                           | .          | 8                      | 4                    |
| 54                         | 30,000 | ,00    | .                                           | .          | 8                      | 3                    |
| 55                         | 30,000 | ,00    | .                                           | .          | 8                      | 2                    |
| 56                         | 30,000 | ,00    | .                                           | .          | 8                      | 1                    |
| 57                         | 30,000 | ,00    | .                                           | .          | 8                      | 0                    |
| 1,00 1                     | 5,000  | 1,00   | ,800                                        | ,179       | 1                      | 4                    |
| 2                          | 8,000  | 1,00   | ,600                                        | ,219       | 2                      | 3                    |
| 3                          | 10,000 | 1,00   | ,400                                        | ,219       | 3                      | 2                    |
| 4                          | 30,000 | ,00    | .                                           | .          | 3                      | 1                    |
| 5                          | 30,000 | ,00    | .                                           | .          | 3                      | 0                    |

Means and Medians for Survival Time

| Severe Sepsis/Septic Shock | Mean <sup>a</sup> |            |                         |             | Median   |            |             |
|----------------------------|-------------------|------------|-------------------------|-------------|----------|------------|-------------|
|                            | Estimate          | Std. Error | 95% Confidence Interval |             | Estimate | Std. Error | 95% ...     |
|                            |                   |            | Lower Bound             | Upper Bound |          |            | Lower Bound |
| ,00                        | 27,912            | ,813       | 26,319                  | 29,505      | .        | .          | .           |
| 1,00                       | 16,600            | 4,944      | 6,909                   | 26,291      | 10,000   | 2,191      | 5,706       |
| Overall                    | 27,000            | ,933       | 25,171                  | 28,829      | .        | .          | .           |

Means and Medians for Survival Time

| Severe Sepsis/Septic Shock | Median      |
|----------------------------|-------------|
|                            | 95% ...     |
|                            | Upper Bound |
| ,00                        | .           |
| 1,00                       | 14,294      |
| Overall                    | .           |

a. Estimation is limited to the largest survival time if it is censored.

Overall Comparisons

|                       | Chi-Square | df | Sig. |
|-----------------------|------------|----|------|
| Log Rank (Mantel-Cox) | 10,223     | 1  | ,001 |

Test of equality of survival distributions for the different levels of Severe Sepsis/Septic Shock

### Survival Functions

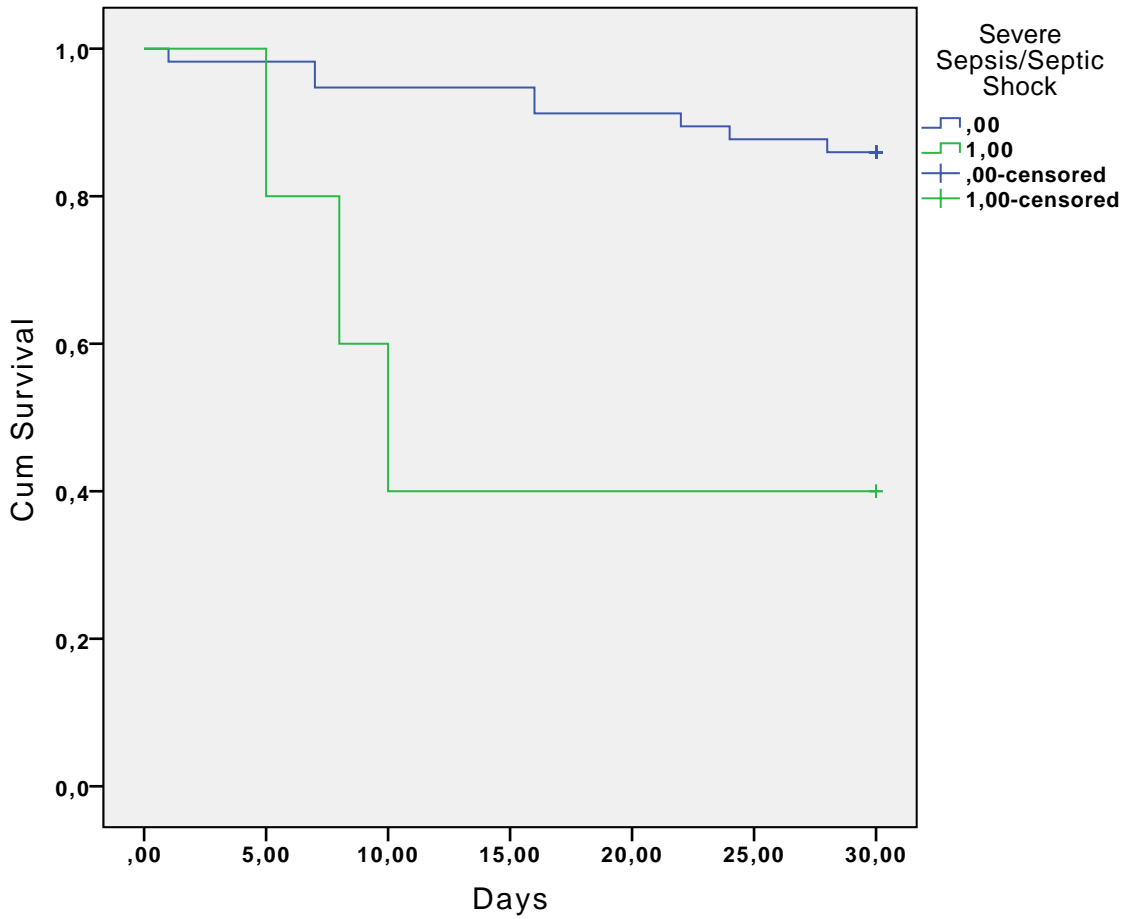

### CHARLSON INDEX>3 (0=NO, 1=YES)

#### Case Processing Summary

| Charlson Index>3 | Total N | N of Events | Censored |         |
|------------------|---------|-------------|----------|---------|
|                  |         |             | N        | Percent |
| ,00              | 30      | 2           | 28       | 93,3%   |
| 1,00             | 30      | 9           | 21       | 70,0%   |
| Overall          | 60      | 11          | 49       | 81,7%   |

Survival Table

| Charlson Index>3 | Time | Status | Cumulative Proportion Surviving at the Time |            | N of Cumulative Events | N of Remaining Cases |    |
|------------------|------|--------|---------------------------------------------|------------|------------------------|----------------------|----|
|                  |      |        | Estimate                                    | Std. Error |                        |                      |    |
| ,00              | 1    | 8,000  | 1,00                                        | ,967       | ,033                   | 1                    | 29 |
|                  | 2    | 16,000 | 1,00                                        | ,933       | ,046                   | 2                    | 28 |
|                  | 3    | 30,000 | ,00                                         | .          | .                      | 2                    | 27 |
|                  | 4    | 30,000 | ,00                                         | .          | .                      | 2                    | 26 |
|                  | 5    | 30,000 | ,00                                         | .          | .                      | 2                    | 25 |
|                  | 6    | 30,000 | ,00                                         | .          | .                      | 2                    | 24 |
|                  | 7    | 30,000 | ,00                                         | .          | .                      | 2                    | 23 |
|                  | 8    | 30,000 | ,00                                         | .          | .                      | 2                    | 22 |
|                  | 9    | 30,000 | ,00                                         | .          | .                      | 2                    | 21 |
|                  | 10   | 30,000 | ,00                                         | .          | .                      | 2                    | 20 |
|                  | 11   | 30,000 | ,00                                         | .          | .                      | 2                    | 19 |
|                  | 12   | 30,000 | ,00                                         | .          | .                      | 2                    | 18 |
|                  | 13   | 30,000 | ,00                                         | .          | .                      | 2                    | 17 |
|                  | 14   | 30,000 | ,00                                         | .          | .                      | 2                    | 16 |
|                  | 15   | 30,000 | ,00                                         | .          | .                      | 2                    | 15 |
|                  | 16   | 30,000 | ,00                                         | .          | .                      | 2                    | 14 |
|                  | 17   | 30,000 | ,00                                         | .          | .                      | 2                    | 13 |
|                  | 18   | 30,000 | ,00                                         | .          | .                      | 2                    | 12 |
|                  | 19   | 30,000 | ,00                                         | .          | .                      | 2                    | 11 |
|                  | 20   | 30,000 | ,00                                         | .          | .                      | 2                    | 10 |
|                  | 21   | 30,000 | ,00                                         | .          | .                      | 2                    | 9  |
|                  | 22   | 30,000 | ,00                                         | .          | .                      | 2                    | 8  |
|                  | 23   | 30,000 | ,00                                         | .          | .                      | 2                    | 7  |
|                  | 24   | 30,000 | ,00                                         | .          | .                      | 2                    | 6  |
|                  | 25   | 30,000 | ,00                                         | .          | .                      | 2                    | 5  |
|                  | 26   | 30,000 | ,00                                         | .          | .                      | 2                    | 4  |
|                  | 27   | 30,000 | ,00                                         | .          | .                      | 2                    | 3  |
|                  | 28   | 30,000 | ,00                                         | .          | .                      | 2                    | 2  |
|                  | 29   | 30,000 | ,00                                         | .          | .                      | 2                    | 1  |
|                  | 30   | 30,000 | ,00                                         | .          | .                      | 2                    | 0  |
| 1,00             | 1    | 1,000  | 1,00                                        | ,967       | ,033                   | 1                    | 29 |
|                  | 2    | 5,000  | 1,00                                        | ,933       | ,046                   | 2                    | 28 |
|                  | 3    | 7,000  | 1,00                                        | .          | .                      | 3                    | 27 |
|                  | 4    | 7,000  | 1,00                                        | ,867       | ,062                   | 4                    | 26 |
|                  | 5    | 10,000 | 1,00                                        | ,833       | ,068                   | 5                    | 25 |
|                  | 6    | 16,000 | 1,00                                        | ,800       | ,073                   | 6                    | 24 |
|                  | 7    | 22,000 | 1,00                                        | ,767       | ,077                   | 7                    | 23 |
|                  | 8    | 24,000 | 1,00                                        | ,733       | ,081                   | 8                    | 22 |
|                  | 9    | 28,000 | 1,00                                        | ,700       | ,084                   | 9                    | 21 |
|                  | 10   | 30,000 | ,00                                         | .          | .                      | 9                    | 20 |
|                  | 11   | 30,000 | ,00                                         | .          | .                      | 9                    | 19 |
|                  | 12   | 30,000 | ,00                                         | .          | .                      | 9                    | 18 |
|                  | 13   | 30,000 | ,00                                         | .          | .                      | 9                    | 17 |
|                  | 14   | 30,000 | ,00                                         | .          | .                      | 9                    | 16 |
|                  | 15   | 30,000 | ,00                                         | .          | .                      | 9                    | 15 |
|                  | 16   | 30,000 | ,00                                         | .          | .                      | 9                    | 14 |
|                  | 17   | 30,000 | ,00                                         | .          | .                      | 9                    | 13 |
|                  | 18   | 30,000 | ,00                                         | .          | .                      | 9                    | 12 |
|                  | 19   | 30,000 | ,00                                         | .          | .                      | 9                    | 11 |

**Survival Table**

| Charlson Index>3 | Time   | Status | Cumulative Proportion Surviving at the Time |            | N of Cumulative Events | N of Remaining Cases |
|------------------|--------|--------|---------------------------------------------|------------|------------------------|----------------------|
|                  |        |        | Estimate                                    | Std. Error |                        |                      |
| 20               | 30,000 | ,00    | .                                           | .          | 9                      | 10                   |
| 21               | 30,000 | ,00    | .                                           | .          | 9                      | 9                    |
| 22               | 30,000 | ,00    | .                                           | .          | 9                      | 8                    |
| 23               | 30,000 | ,00    | .                                           | .          | 9                      | 7                    |
| 24               | 30,000 | ,00    | .                                           | .          | 9                      | 6                    |
| 25               | 30,000 | ,00    | .                                           | .          | 9                      | 5                    |
| 26               | 30,000 | ,00    | .                                           | .          | 9                      | 4                    |
| 27               | 30,000 | ,00    | .                                           | .          | 9                      | 3                    |
| 28               | 30,000 | ,00    | .                                           | .          | 9                      | 2                    |
| 29               | 30,000 | ,00    | .                                           | .          | 9                      | 1                    |
| 30               | 30,000 | ,00    | .                                           | .          | 9                      | 0                    |

**Means and Medians for Survival Time**

| Charlson Index>3 | Mean <sup>a</sup> |            |                         |             | Median   |            |             |
|------------------|-------------------|------------|-------------------------|-------------|----------|------------|-------------|
|                  | Estimate          | Std. Error | 95% Confidence Interval |             | Estimate | Std. Error | 95% ...     |
|                  |                   |            | Lower Bound             | Upper Bound |          |            | Lower Bound |
| ,00              | 28,800            | ,841       | 27,151                  | 30,449      | .        | .          | .           |
| 1,00             | 25,000            | 1,658      | 21,750                  | 28,250      | .        | .          | .           |
| Overall          | 26,900            | ,961       | 25,016                  | 28,784      | .        | .          | .           |

**Means and Medians for Survival Time**

| Charlson Index>3 | Median      |
|------------------|-------------|
|                  | 95% ...     |
|                  | Upper Bound |
| ,00              | .           |
| 1,00             | .           |
| Overall          | .           |

a. Estimation is limited to the largest survival time if it is censored.

**Overall Comparisons**

|                       | Chi-Square | df | Sig. |
|-----------------------|------------|----|------|
| Log Rank (Mantel-Cox) | 5,388      | 1  | ,020 |

Test of equality of survival distributions for the different levels of Charlson Index>3

Survival Functions

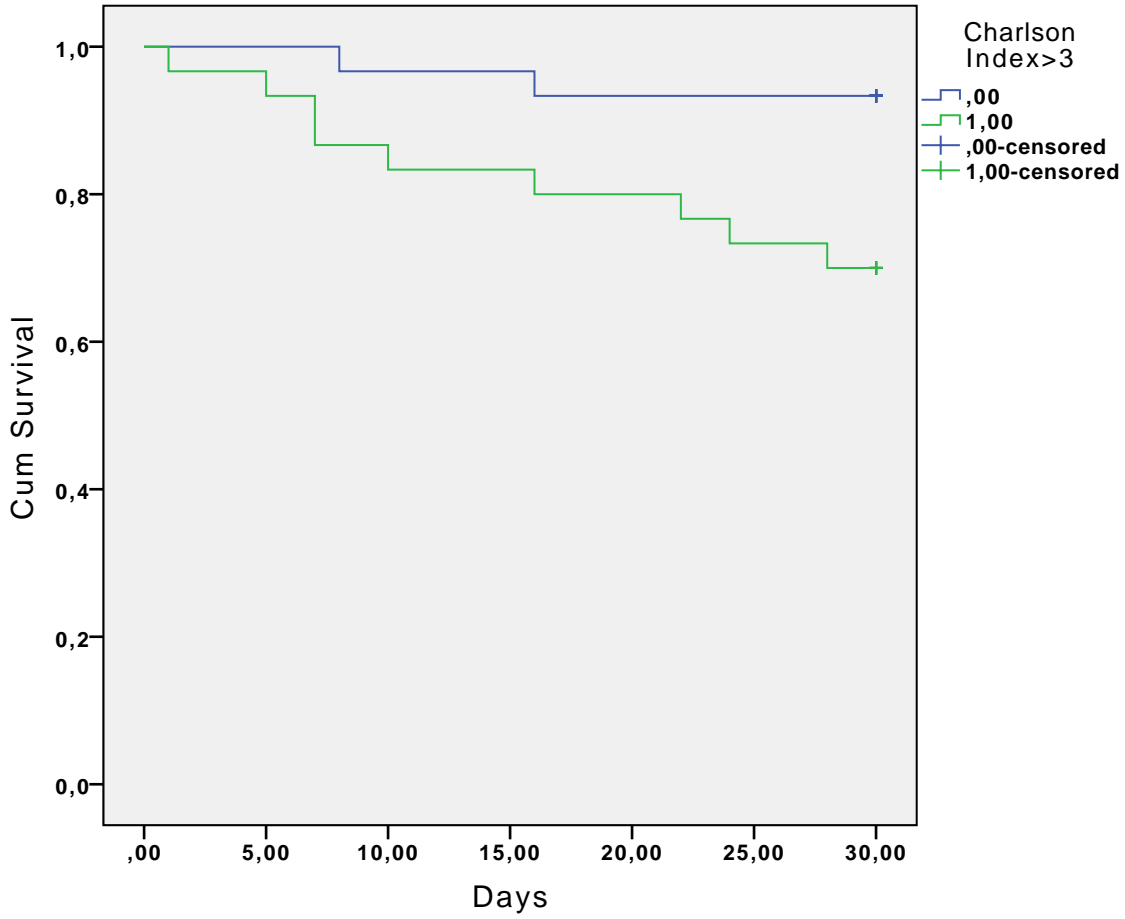

**INADEQUATED DEFINITIVE ANTIBIOTIC TREATMENT (0=NO, 1=YES)**

Case Processing Summary

| Inadequated Definitive Antibiotic Treatment | Total N | N of Events | Censored |         |
|---------------------------------------------|---------|-------------|----------|---------|
|                                             |         |             | N        | Percent |
| ,0                                          | 45      | 5           | 40       | 88,9%   |
| 1,0                                         | 15      | 6           | 9        | 60,0%   |
| Overall                                     | 60      | 11          | 49       | 81,7%   |

Survival Table

| Inadequated Definitive Antibiotic Treatment | Time | Status | Cumulative Proportion Surviving at the Time |            | N of Cumulative Events |
|---------------------------------------------|------|--------|---------------------------------------------|------------|------------------------|
|                                             |      |        | Estimate                                    | Std. Error |                        |
| ,0                                          | 1    | 1,00   | ,978                                        | ,022       | 1                      |
|                                             | 2    | 1,00   | ,956                                        | ,031       | 2                      |
|                                             | 3    | 1,00   | ,933                                        | ,037       | 3                      |
|                                             | 4    | 1,00   | ,911                                        | ,042       | 4                      |
|                                             | 5    | 1,00   | ,889                                        | ,047       | 5                      |
|                                             | 6    | ,00    | .                                           | .          | 5                      |
|                                             | 7    | ,00    | .                                           | .          | 5                      |
|                                             | 8    | ,00    | .                                           | .          | 5                      |
|                                             | 9    | ,00    | .                                           | .          | 5                      |
|                                             | 10   | ,00    | .                                           | .          | 5                      |
|                                             | 11   | ,00    | .                                           | .          | 5                      |
|                                             | 12   | ,00    | .                                           | .          | 5                      |
|                                             | 13   | ,00    | .                                           | .          | 5                      |
|                                             | 14   | ,00    | .                                           | .          | 5                      |
|                                             | 15   | ,00    | .                                           | .          | 5                      |
|                                             | 16   | ,00    | .                                           | .          | 5                      |
|                                             | 17   | ,00    | .                                           | .          | 5                      |
|                                             | 18   | ,00    | .                                           | .          | 5                      |
|                                             | 19   | ,00    | .                                           | .          | 5                      |
|                                             | 20   | ,00    | .                                           | .          | 5                      |
|                                             | 21   | ,00    | .                                           | .          | 5                      |
|                                             | 22   | ,00    | .                                           | .          | 5                      |
|                                             | 23   | ,00    | .                                           | .          | 5                      |
|                                             | 24   | ,00    | .                                           | .          | 5                      |
|                                             | 25   | ,00    | .                                           | .          | 5                      |
|                                             | 26   | ,00    | .                                           | .          | 5                      |
|                                             | 27   | ,00    | .                                           | .          | 5                      |
|                                             | 28   | ,00    | .                                           | .          | 5                      |
|                                             | 29   | ,00    | .                                           | .          | 5                      |
|                                             | 30   | ,00    | .                                           | .          | 5                      |
|                                             | 31   | ,00    | .                                           | .          | 5                      |
|                                             | 32   | ,00    | .                                           | .          | 5                      |
|                                             | 33   | ,00    | .                                           | .          | 5                      |
|                                             | 34   | ,00    | .                                           | .          | 5                      |
|                                             | 35   | ,00    | .                                           | .          | 5                      |
|                                             | 36   | ,00    | .                                           | .          | 5                      |
|                                             | 37   | ,00    | .                                           | .          | 5                      |
|                                             | 38   | ,00    | .                                           | .          | 5                      |
|                                             | 39   | ,00    | .                                           | .          | 5                      |
|                                             | 40   | ,00    | .                                           | .          | 5                      |
|                                             | 41   | ,00    | .                                           | .          | 5                      |
|                                             | 42   | ,00    | .                                           | .          | 5                      |
|                                             | 43   | ,00    | .                                           | .          | 5                      |
|                                             | 44   | ,00    | .                                           | .          | 5                      |
|                                             | 45   | ,00    | .                                           | .          | 5                      |
| 1,0                                         | 1    | 1,00   | ,933                                        | ,064       | 1                      |
|                                             | 2    | 1,00   | ,867                                        | ,088       | 2                      |
|                                             | 3    | 1,00   | ,800                                        | ,103       | 3                      |
|                                             | 4    | 1,00   | ,733                                        | ,114       | 4                      |

Survival Table

|     | N of Remaining Cases |
|-----|----------------------|
| ,0  | 44                   |
|     | 43                   |
|     | 42                   |
|     | 41                   |
|     | 40                   |
|     | 39                   |
|     | 38                   |
|     | 37                   |
|     | 36                   |
|     | 35                   |
|     | 34                   |
|     | 33                   |
|     | 32                   |
|     | 31                   |
|     | 30                   |
|     | 29                   |
|     | 28                   |
|     | 27                   |
|     | 26                   |
|     | 25                   |
|     | 24                   |
|     | 23                   |
|     | 22                   |
|     | 21                   |
|     | 20                   |
|     | 19                   |
|     | 18                   |
|     | 17                   |
|     | 16                   |
|     | 15                   |
|     | 14                   |
|     | 13                   |
|     | 12                   |
|     | 11                   |
|     | 10                   |
|     | 9                    |
|     | 8                    |
|     | 7                    |
|     | 6                    |
|     | 5                    |
|     | 4                    |
|     | 3                    |
|     | 2                    |
|     | 1                    |
|     | 0                    |
| 1,0 | 14                   |
|     | 13                   |
|     | 12                   |
|     | 11                   |

Survival Table

| Inadequated Definitive Antibiotic Treatment | Time   | Status | Cumulative Proportion Surviving at the Time |            | N of Cumulative Events |
|---------------------------------------------|--------|--------|---------------------------------------------|------------|------------------------|
|                                             |        |        | Estimate                                    | Std. Error |                        |
| 5                                           | 16,000 | 1,00   | ,667                                        | ,122       | 5                      |
| 6                                           | 28,000 | 1,00   | ,600                                        | ,126       | 6                      |
| 7                                           | 30,000 | ,00    | .                                           | .          | 6                      |
| 8                                           | 30,000 | ,00    | .                                           | .          | 6                      |
| 9                                           | 30,000 | ,00    | .                                           | .          | 6                      |
| 10                                          | 30,000 | ,00    | .                                           | .          | 6                      |
| 11                                          | 30,000 | ,00    | .                                           | .          | 6                      |
| 12                                          | 30,000 | ,00    | .                                           | .          | 6                      |
| 13                                          | 30,000 | ,00    | .                                           | .          | 6                      |
| 14                                          | 30,000 | ,00    | .                                           | .          | 6                      |
| 15                                          | 30,000 | ,00    | .                                           | .          | 6                      |

Survival Table

| Inadequated Definitive Antibiotic Treatment | N of Remaining Cases |
|---------------------------------------------|----------------------|
| 5                                           | 10                   |
| 6                                           | 9                    |
| 7                                           | 8                    |
| 8                                           | 7                    |
| 9                                           | 6                    |
| 10                                          | 5                    |
| 11                                          | 4                    |
| 12                                          | 3                    |
| 13                                          | 2                    |
| 14                                          | 1                    |
| 15                                          | 0                    |

Means and Medians for Survival Time

| Inadequated Definitive Antibiotic Treatment | Mean <sup>a</sup> |            |                         |             | Median   |            |             |
|---------------------------------------------|-------------------|------------|-------------------------|-------------|----------|------------|-------------|
|                                             | Estimate          | Std. Error | 95% Confidence Interval |             | Estimate | Std. Error | 95% ...     |
|                                             |                   |            | Lower Bound             | Upper Bound |          |            | Lower Bound |
| ,0                                          | 28,422            | ,741       | 26,969                  | 29,875      | .        | .          | .           |
| 1,0                                         | 22,333            | 2,826      | 16,794                  | 27,873      | .        | .          | .           |
| Overall                                     | 26,900            | ,961       | 25,016                  | 28,784      | .        | .          | .           |

Means and Medians for Survival Time

| Inadequated Definitive Antibiotic Treatment | Median      |
|---------------------------------------------|-------------|
|                                             | 95% ...     |
|                                             | Upper Bound |
| ,0                                          | .           |
| 1,0                                         | .           |
| Overall                                     | .           |

a. Estimation is limited to the largest survival time if it is censored.



Overall Comparisons

|                       | Chi-Square | df | Sig. |
|-----------------------|------------|----|------|
| Log Rank (Mantel-Cox) | 7,298      | 1  | ,007 |

Test of equality of survival distributions for the different levels of Inadequated Definitive Antibiotic Treatment

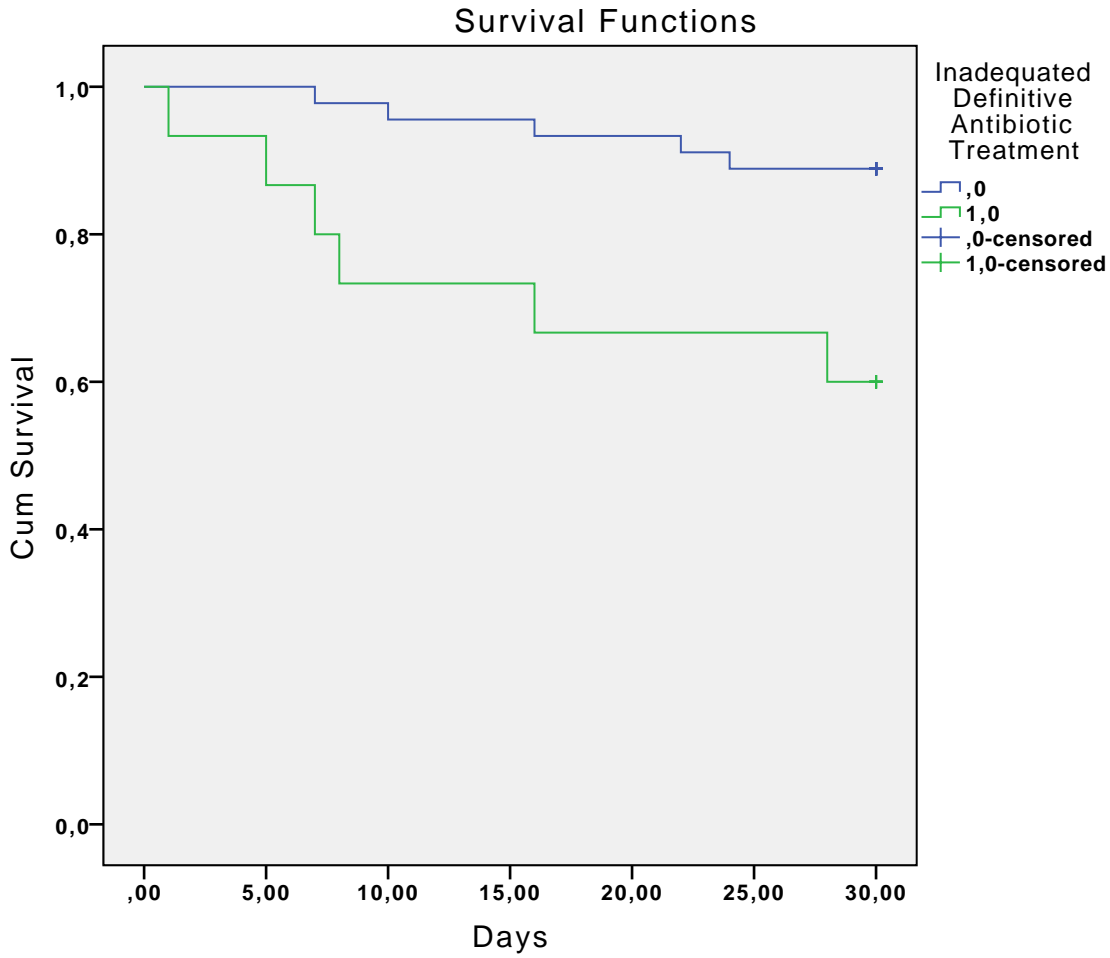

Supplement: pone.0178178.s003.pdf [file pone.0178178.s003.pdf]
