# Supplementary material for: Pseudomonas aeruginosa urinary tract infections in hospitalized patients: Mortality and prognostic factors
Source: PubMed Central journal article supplement (PMC5446154; doi:10.1371/journal.pone.0178178), 2017-05-26
Supplement: pone.0178178.s001.pdf [file pone.0178178.s001.pdf]

## Frequency Tables and Descriptive Statistics

|                    |       | Age     | BMI   | Days of Hospital Stay | Days of ICU Stay | Baseline Creatinine | Number of Previous Antibiotics | Number of Previous Antibiotic Families |
|--------------------|-------|---------|-------|-----------------------|------------------|---------------------|--------------------------------|----------------------------------------|
| N                  | Valid | 62      | 40    | 62                    | 62               | 62                  | 62                             | 62                                     |
|                    | Lost  | 0       | 22    | 0                     | 0                | 0                   | 0                              | 0                                      |
| Mean               |       | 75,371  | 27,23 | 49,661                | 3,597            | 1,181               | 2,161                          | 2,065                                  |
| Median             |       | 78,500  | 25,50 | 15,500                | ,000             | ,900                | 2,000                          | 2,000                                  |
| Standard Deviation |       | 12,1914 | 7,846 | 188,8042              | 9,8936           | ,8290               | 1,9350                         | 1,5563                                 |
| Minimum            |       | 44,0    | 14    | 1,0                   | ,0               | ,3                  | ,0                             | ,0                                     |
| Maximum            |       | 99,0    | 54    | 1486,0                | 41,0             | 3,8                 | 9,0                            | 6,0                                    |

|                    |       | SBP     | DBP     | HR      | T <sup>a</sup> | LEUCOCITES | NEUTROPHILS | HB      |
|--------------------|-------|---------|---------|---------|----------------|------------|-------------|---------|
| N                  | Valid | 59      | 59      | 54      | 61             | 61         | 40          | 9       |
|                    | Lost  | 3       | 3       | 8       | 1              | 1          | 22          | 53      |
| Mean               |       | 119,932 | 71,780  | 88,593  | 37,128         | 11393,279  | 8088,150    | 11,4444 |
| Median             |       | 120,000 | 70,000  | 87,500  | 36,900         | 8720,000   | 6275,000    | 11,0000 |
| Standard Deviation |       | 23,9568 | 15,1488 | 22,0433 | 1,2553         | 6410,9359  | 6181,2438   | 1,58990 |
| Minimum            |       | 79,0    | 44,0    | 40,0    | 35,0           | 3300,0     | 6,0         | 10,00   |
| Maximum            |       | 180,0   | 110,0   | 144,0   | 39,5           | 32930,0    | 30300,0     | 15,00   |

|                    |       | PLATELETS  | CREATININE |
|--------------------|-------|------------|------------|
| N                  | Valid | 61         | 60         |
|                    | Lost  | 1          | 2          |
| Mean               |       | 290213,115 | 1,618      |
| Median             |       | 261000,000 | ,950       |
| Standard Deviation |       | 199594,515 | 1,4258     |
| Minimum            |       | 95000,0    | ,3         |
| Maximum            |       | 1573000,0  | 6,2        |

### Enterococcus spp

|       | Frequency | Percent | Valid Percent | Cumulative Percent |
|-------|-----------|---------|---------------|--------------------|
| Valid | ,00       | 52      | 83,9          | 83,9               |
|       | 1,00      | 10      | 16,1          | 100,0              |
| Total |           | 62      | 100,0         | 100,0              |

**E. faecalis**

|           | Frequency | Percent | Valid Percent | Cumulative Percent |
|-----------|-----------|---------|---------------|--------------------|
| Valid ,00 | 53        | 85,5    | 85,5          | 85,5               |
| 1,00      | 9         | 14,5    | 14,5          | 100,0              |
| Total     | 62        | 100,0   | 100,0         |                    |

**E. faecium**

|           | Frequency | Percent | Valid Percent | Cumulative Percent |
|-----------|-----------|---------|---------------|--------------------|
| Valid ,00 | 61        | 98,4    | 98,4          | 98,4               |
| 1,00      | 1         | 1,6     | 1,6           | 100,0              |
| Total     | 62        | 100,0   | 100,0         |                    |

**S. aureus**

|           | Frequency | Percent | Valid Percent | Cumulative Percent |
|-----------|-----------|---------|---------------|--------------------|
| Valid ,00 | 61        | 98,4    | 98,4          | 98,4               |
| 1,00      | 1         | 1,6     | 1,6           | 100,0              |
| Total     | 62        | 100,0   | 100,0         |                    |

**E. coli**

|           | Frequency | Percent | Valid Percent | Cumulative Percent |
|-----------|-----------|---------|---------------|--------------------|
| Valid ,00 | 58        | 93,5    | 93,5          | 93,5               |
| 1,00      | 4         | 6,5     | 6,5           | 100,0              |
| Total     | 62        | 100,0   | 100,0         |                    |

**Klebsiella spp**

|           | Frequency | Percent | Valid Percent | Cumulative Percent |
|-----------|-----------|---------|---------------|--------------------|
| Valid ,00 | 60        | 96,8    | 96,8          | 96,8               |
| 1,00      | 2         | 3,2     | 3,2           | 100,0              |
| Total     | 62        | 100,0   | 100,0         |                    |

**Citrobacter spp**

|           | Frequency | Percent | Valid Percent | Cumulative Percent |
|-----------|-----------|---------|---------------|--------------------|
| Valid ,00 | 61        | 98,4    | 98,4          | 98,4               |
| 1,00      | 1         | 1,6     | 1,6           | 100,0              |
| Total     | 62        | 100,0   | 100,0         |                    |

**Morganella spp**

|           | Frequency | Percent | Valid Percent | Cumulative Percent |
|-----------|-----------|---------|---------------|--------------------|
| Valid ,00 | 61        | 98,4    | 98,4          | 98,4               |
| 1,00      | 1         | 1,6     | 1,6           | 100,0              |
| Total     | 62        | 100,0   | 100,0         |                    |

**Enterobacter spp**

|           | Frequency | Percent | Valid Percent | Cumulative Percent |
|-----------|-----------|---------|---------------|--------------------|
| Valid ,00 | 60        | 96,8    | 96,8          | 96,8               |
| 1,00      | 2         | 3,2     | 3,2           | 100,0              |
| Total     | 62        | 100,0   | 100,0         |                    |

**Candida spp**

|           | Frequency | Percent | Valid Percent | Cumulative Percent |
|-----------|-----------|---------|---------------|--------------------|
| Valid ,00 | 61        | 98,4    | 98,4          | 98,4               |
| 1,00      | 1         | 1,6     | 1,6           | 100,0              |
| Total     | 62        | 100,0   | 100,0         |                    |

**Mortality\_1\_month**

|           | Frequency | Percent | Valid Percent | Cumulative Percent |
|-----------|-----------|---------|---------------|--------------------|
| Valid ,00 | 51        | 82,3    | 82,3          | 82,3               |
| 1,00      | 11        | 17,7    | 17,7          | 100,0              |
| Total     | 62        | 100,0   | 100,0         |                    |

**Mortality\_3\_months**

|           | Frequency | Percent | Valid Percent | Cumulative Percent |
|-----------|-----------|---------|---------------|--------------------|
| Valid ,00 | 41        | 66,1    | 66,1          | 66,1               |
| 1,00      | 21        | 33,9    | 33,9          | 100,0              |
| Total     | 62        | 100,0   | 100,0         |                    |

**Carbapenem Resistant**

|          | Frequency | Percent | Valid Percent | Cumulative Percent |
|----------|-----------|---------|---------------|--------------------|
| Valid ,0 | 50        | 80,6    | 80,6          | 80,6               |
| 1,0      | 12        | 19,4    | 19,4          | 100,0              |
| Total    | 62        | 100,0   | 100,0         |                    |

**Monomicrobial Culture**

|           | Frequency | Percent | Valid Percent | Cumulative Percent |
|-----------|-----------|---------|---------------|--------------------|
| Valid ,00 | 20        | 32,3    | 32,3          | 32,3               |
| 1,00      | 42        | 67,7    | 67,7          | 100,0              |
| Total     | 62        | 100,0   | 100,0         |                    |

**Adequated Empirical Antibiotic Treatment**

|                | Frequency | Percent | Valid Percent | Cumulative Percent |
|----------------|-----------|---------|---------------|--------------------|
| Valid ,0       | 38        | 61,3    | 71,7          | 71,7               |
| 1,0            | 15        | 24,2    | 28,3          | 100,0              |
| Total          | 53        | 85,5    | 100,0         |                    |
| Missing System | 9         | 14,5    |               |                    |
| Total          | 62        | 100,0   |               |                    |

**Female Sex**

|         | Frequency | Percent | Valid Percent | Cumulative Percent |
|---------|-----------|---------|---------------|--------------------|
| Valid 0 | 32        | 51,6    | 51,6          | 51,6               |
| 1       | 30        | 48,4    | 48,4          | 100,0              |
| Total   | 62        | 100,0   | 100,0         |                    |

**Malnutrition**

|         |        | Frequency | Percent | Valid Percent | Cumulative Percent |
|---------|--------|-----------|---------|---------------|--------------------|
| Valid   | ,0     | 43        | 69,4    | 78,2          | 78,2               |
|         | 1,0    | 12        | 19,4    | 21,8          | 100,0              |
|         | Total  | 55        | 88,7    | 100,0         |                    |
| Missing | System | 7         | 11,3    |               |                    |
| Total   |        | 62        | 100,0   |               |                    |

**Obesity**

|         |        | Frequency | Percent | Valid Percent | Cumulative Percent |
|---------|--------|-----------|---------|---------------|--------------------|
| Valid   | ,0     | 39        | 62,9    | 72,2          | 72,2               |
|         | 1,0    | 15        | 24,2    | 27,8          | 100,0              |
|         | Total  | 54        | 87,1    | 100,0         |                    |
| Missing | System | 8         | 12,9    |               |                    |
| Total   |        | 62        | 100,0   |               |                    |

**Intensive Care Unit**

|       |       | Frequency | Percent | Valid Percent | Cumulative Percent |
|-------|-------|-----------|---------|---------------|--------------------|
| Valid | ,0    | 48        | 77,4    | 77,4          | 77,4               |
|       | 1,0   | 14        | 22,6    | 22,6          | 100,0              |
|       | Total | 62        | 100,0   | 100,0         |                    |

**NOSOCOMIAL**

|         |        | Frequency | Percent | Valid Percent | Cumulative Percent |
|---------|--------|-----------|---------|---------------|--------------------|
| Valid   | ,0     | 34        | 54,8    | 55,7          | 55,7               |
|         | 1,0    | 27        | 43,5    | 44,3          | 100,0              |
|         | Total  | 61        | 98,4    | 100,0         |                    |
| Missing | System | 1         | 1,6     |               |                    |
| Total   |        | 62        | 100,0   |               |                    |

**Health Care Associated**

|         |        | Frequency | Percent | Valid Percent | Cumulative Percent |
|---------|--------|-----------|---------|---------------|--------------------|
| Valid   | ,0     | 41        | 66,1    | 67,2          | 67,2               |
|         | 1,0    | 20        | 32,3    | 32,8          | 100,0              |
|         | Total  | 61        | 98,4    | 100,0         |                    |
| Missing | System | 1         | 1,6     |               |                    |
| Total   |        | 62        | 100,0   |               |                    |

**Institucionalized**

|         |        | Frequency | Percent | Valid Percent | Cumulative Percent |
|---------|--------|-----------|---------|---------------|--------------------|
| Valid   | ,0     | 57        | 91,9    | 95,0          | 95,0               |
|         | 1,0    | 3         | 4,8     | 5,0           | 100,0              |
|         | Total  | 60        | 96,8    | 100,0         |                    |
| Missing | System | 2         | 3,2     |               |                    |
| Total   |        | 62        | 100,0   |               |                    |

**Central Venous Catheter**

|          | Frequency | Percent | Valid Percent | Cumulative Percent |
|----------|-----------|---------|---------------|--------------------|
| Valid ,0 | 55        | 88,7    | 88,7          | 88,7               |
| 1,0      | 7         | 11,3    | 11,3          | 100,0              |
| Total    | 62        | 100,0   | 100,0         |                    |

**Mechanical Ventilation**

|          | Frequency | Percent | Valid Percent | Cumulative Percent |
|----------|-----------|---------|---------------|--------------------|
| Valid ,0 | 57        | 91,9    | 91,9          | 91,9               |
| 1,0      | 5         | 8,1     | 8,1           | 100,0              |
| Total    | 62        | 100,0   | 100,0         |                    |

**Urinary Catheter**

|          | Frequency | Percent | Valid Percent | Cumulative Percent |
|----------|-----------|---------|---------------|--------------------|
| Valid ,0 | 19        | 30,6    | 30,6          | 30,6               |
| 1,0      | 43        | 69,4    | 69,4          | 100,0              |
| Total    | 62        | 100,0   | 100,0         |                    |

**Gastrostomy**

|          | Frequency | Percent | Valid Percent | Cumulative Percent |
|----------|-----------|---------|---------------|--------------------|
| Valid ,0 | 56        | 90,3    | 90,3          | 90,3               |
| 1,0      | 6         | 9,7     | 9,7           | 100,0              |
| Total    | 62        | 100,0   | 100,0         |                    |

**Cognitive Impairment**

|          | Frequency | Percent | Valid Percent | Cumulative Percent |
|----------|-----------|---------|---------------|--------------------|
| Valid ,0 | 39        | 62,9    | 62,9          | 62,9               |
| 1,0      | 23        | 37,1    | 37,1          | 100,0              |
| Total    | 62        | 100,0   | 100,0         |                    |

**Solid Organ Cancer**

|          | Frequency | Percent | Valid Percent | Cumulative Percent |
|----------|-----------|---------|---------------|--------------------|
| Valid ,0 | 48        | 77,4    | 77,4          | 77,4               |
| 1,0      | 14        | 22,6    | 22,6          | 100,0              |
| Total    | 62        | 100,0   | 100,0         |                    |

**Leukemia**

|          | Frequency | Percent | Valid Percent | Cumulative Percent |
|----------|-----------|---------|---------------|--------------------|
| Valid ,0 | 61        | 98,4    | 98,4          | 98,4               |
| 1,0      | 1         | 1,6     | 1,6           | 100,0              |
| Total    | 62        | 100,0   | 100,0         |                    |

**Liver Disease**

|          | Frequency | Percent | Valid Percent | Cumulative Percent |
|----------|-----------|---------|---------------|--------------------|
| Valid ,0 | 54        | 87,1    | 87,1          | 87,1               |
| 1,0      | 8         | 12,9    | 12,9          | 100,0              |
| Total    | 62        | 100,0   | 100,0         |                    |

**Lymphoma**

|          | Frequency | Percent | Valid Percent | Cumulative Percent |
|----------|-----------|---------|---------------|--------------------|
| Valid ,0 | 62        | 100,0   | 100,0         | 100,0              |

**Metastatic Cancer**

|              | Frequency | Percent      | Valid Percent | Cumulative Percent |
|--------------|-----------|--------------|---------------|--------------------|
| Valid ,0     | 58        | 93,5         | 93,5          | 93,5               |
| 1,0          | 4         | 6,5          | 6,5           | 100,0              |
| <b>Total</b> | <b>62</b> | <b>100,0</b> | <b>100,0</b>  |                    |

**Conective Tissue Disease**

|              | Frequency | Percent      | Valid Percent | Cumulative Percent |
|--------------|-----------|--------------|---------------|--------------------|
| Valid ,0     | 60        | 96,8         | 96,8          | 96,8               |
| 1,0          | 2         | 3,2          | 3,2           | 100,0              |
| <b>Total</b> | <b>62</b> | <b>100,0</b> | <b>100,0</b>  |                    |

**Advanced Chronic Liver Disease**

|                | Frequency | Percent      | Valid Percent | Cumulative Percent |
|----------------|-----------|--------------|---------------|--------------------|
| Valid ,0       | 59        | 95,2         | 96,7          | 96,7               |
| 1,0            | 2         | 3,2          | 3,3           | 100,0              |
| <b>Total</b>   | <b>61</b> | <b>98,4</b>  | <b>100,0</b>  |                    |
| Missing System | 1         | 1,6          |               |                    |
| <b>Total</b>   | <b>62</b> | <b>100,0</b> |               |                    |

**Diabetes Mellitus**

|              | Frequency | Percent      | Valid Percent | Cumulative Percent |
|--------------|-----------|--------------|---------------|--------------------|
| Valid ,0     | 43        | 69,4         | 69,4          | 69,4               |
| 1,0          | 19        | 30,6         | 30,6          | 100,0              |
| <b>Total</b> | <b>62</b> | <b>100,0</b> | <b>100,0</b>  |                    |

**Diabetes Mellitus with Target Organ Damage**

|              | Frequency | Percent      | Valid Percent | Cumulative Percent |
|--------------|-----------|--------------|---------------|--------------------|
| Valid ,0     | 55        | 88,7         | 88,7          | 88,7               |
| 1,0          | 7         | 11,3         | 11,3          | 100,0              |
| <b>Total</b> | <b>62</b> | <b>100,0</b> | <b>100,0</b>  |                    |

**Hypertension**

|              | Frequency | Percent      | Valid Percent | Cumulative Percent |
|--------------|-----------|--------------|---------------|--------------------|
| Valid ,0     | 28        | 45,2         | 45,2          | 45,2               |
| 1,0          | 34        | 54,8         | 54,8          | 100,0              |
| <b>Total</b> | <b>62</b> | <b>100,0</b> | <b>100,0</b>  |                    |

**Dyslipidemia**

|              | Frequency | Percent      | Valid Percent | Cumulative Percent |
|--------------|-----------|--------------|---------------|--------------------|
| Valid ,0     | 39        | 62,9         | 62,9          | 62,9               |
| 1,0          | 23        | 37,1         | 37,1          | 100,0              |
| <b>Total</b> | <b>62</b> | <b>100,0</b> | <b>100,0</b>  |                    |

**Respiratory Disease**

|          | Frequency | Percent | Valid Percent | Cumulative Percent |
|----------|-----------|---------|---------------|--------------------|
| Valid ,0 | 48        | 77,4    | 77,4          | 77,4               |
| 1,0      | 14        | 22,6    | 22,6          | 100,0              |
| Total    | 62        | 100,0   | 100,0         |                    |

**COPD**

|          | Frequency | Percent | Valid Percent | Cumulative Percent |
|----------|-----------|---------|---------------|--------------------|
| Valid ,0 | 54        | 87,1    | 87,1          | 87,1               |
| 1,0      | 8         | 12,9    | 12,9          | 100,0              |
| Total    | 62        | 100,0   | 100,0         |                    |

**Heart Disease**

|          | Frequency | Percent | Valid Percent | Cumulative Percent |
|----------|-----------|---------|---------------|--------------------|
| Valid ,0 | 34        | 54,8    | 54,8          | 54,8               |
| 1,0      | 28        | 45,2    | 45,2          | 100,0              |
| Total    | 62        | 100,0   | 100,0         |                    |

**Heart Failure**

|          | Frequency | Percent | Valid Percent | Cumulative Percent |
|----------|-----------|---------|---------------|--------------------|
| Valid ,0 | 47        | 75,8    | 75,8          | 75,8               |
| 1,0      | 15        | 24,2    | 24,2          | 100,0              |
| Total    | 62        | 100,0   | 100,0         |                    |

**Myocardial Infarction**

|          | Frequency | Percent | Valid Percent | Cumulative Percent |
|----------|-----------|---------|---------------|--------------------|
| Valid ,0 | 52        | 83,9    | 83,9          | 83,9               |
| 1,0      | 10        | 16,1    | 16,1          | 100,0              |
| Total    | 62        | 100,0   | 100,0         |                    |

**Peripheral Arterial Disease**

|          | Frequency | Percent | Valid Percent | Cumulative Percent |
|----------|-----------|---------|---------------|--------------------|
| Valid ,0 | 51        | 82,3    | 82,3          | 82,3               |
| 1,0      | 11        | 17,7    | 17,7          | 100,0              |
| Total    | 62        | 100,0   | 100,0         |                    |

**Cerebrovascular Disease**

|          | Frequency | Percent | Valid Percent | Cumulative Percent |
|----------|-----------|---------|---------------|--------------------|
| Valid ,0 | 44        | 71,0    | 71,0          | 71,0               |
| 1,0      | 18        | 29,0    | 29,0          | 100,0              |
| Total    | 62        | 100,0   | 100,0         |                    |

**Hemiplegia**

|          | Frequency | Percent | Valid Percent | Cumulative Percent |
|----------|-----------|---------|---------------|--------------------|
| Valid ,0 | 55        | 88,7    | 88,7          | 88,7               |
| 1,0      | 7         | 11,3    | 11,3          | 100,0              |
| Total    | 62        | 100,0   | 100,0         |                    |

**Ulcus**

|          | Frequency | Percent | Valid Percent | Cumulative Percent |
|----------|-----------|---------|---------------|--------------------|
| Valid ,0 | 54        | 87,1    | 87,1          | 87,1               |
| 1,0      | 8         | 12,9    | 12,9          | 100,0              |
| Total    | 62        | 100,0   | 100,0         |                    |

**Chronic Kidney Disease (Moderate/Severe)**

|          | Frequency | Percent | Valid Percent | Cumulative Percent |
|----------|-----------|---------|---------------|--------------------|
| Valid ,0 | 53        | 85,5    | 85,5          | 85,5               |
| 1,0      | 9         | 14,5    | 14,5          | 100,0              |
| Total    | 62        | 100,0   | 100,0         |                    |

**Chronic Kidney Disease**

|          | Frequency | Percent | Valid Percent | Cumulative Percent |
|----------|-----------|---------|---------------|--------------------|
| Valid ,0 | 49        | 79,0    | 79,0          | 79,0               |
| 1,0      | 13        | 21,0    | 21,0          | 100,0              |
| Total    | 62        | 100,0   | 100,0         |                    |

**Dialysis**

|          | Frequency | Percent | Valid Percent | Cumulative Percent |
|----------|-----------|---------|---------------|--------------------|
| Valid ,0 | 62        | 100,0   | 100,0         | 100,0              |

**HIV**

|          | Frequency | Percent | Valid Percent | Cumulative Percent |
|----------|-----------|---------|---------------|--------------------|
| Valid ,0 | 62        | 100,0   | 100,0         | 100,0              |

**AIDS**

|          | Frequency | Percent | Valid Percent | Cumulative Percent |
|----------|-----------|---------|---------------|--------------------|
| Valid ,0 | 62        | 100,0   | 100,0         | 100,0              |

**Immunosuppression (Neutropenia/Solid Organ Transplant/Immunosuppressive Treatment)**

|           | Frequency | Percent | Valid Percent | Cumulative Percent |
|-----------|-----------|---------|---------------|--------------------|
| Valid ,00 | 49        | 79,0    | 79,0          | 79,0               |
| 1,00      | 13        | 21,0    | 21,0          | 100,0              |
| Total     | 62        | 100,0   | 100,0         |                    |

**Previous 30 Days Surgery**

|                | Frequency | Percent | Valid Percent | Cumulative Percent |
|----------------|-----------|---------|---------------|--------------------|
| Valid ,0       | 46        | 74,2    | 76,7          | 76,7               |
| 1,0            | 14        | 22,6    | 23,3          | 100,0              |
| Total          | 60        | 96,8    | 100,0         |                    |
| Missing System | 2         | 3,2     |               |                    |
| Total          | 62        | 100,0   |               |                    |



**Antibiotic Treatment in Previous 90 Days**

|                | Frequency | Percent | Valid Percent | Cumulative Percent |
|----------------|-----------|---------|---------------|--------------------|
| Valid ,0       | 9         | 14,5    | 15,3          | 15,3               |
| 1,0            | 50        | 80,6    | 84,7          | 100,0              |
| Total          | 59        | 95,2    | 100,0         |                    |
| Missing System | 3         | 4,8     |               |                    |
| Total          | 62        | 100,0   |               |                    |

**Hypotension**

|                | Frequency | Percent | Valid Percent | Cumulative Percent |
|----------------|-----------|---------|---------------|--------------------|
| Valid ,0       | 50        | 80,6    | 82,0          | 82,0               |
| 1,0            | 11        | 17,7    | 18,0          | 100,0              |
| Total          | 61        | 98,4    | 100,0         |                    |
| Missing System | 1         | 1,6     |               |                    |
| Total          | 62        | 100,0   |               |                    |

**Tachycardia**

|                | Frequency | Percent | Valid Percent | Cumulative Percent |
|----------------|-----------|---------|---------------|--------------------|
| Valid ,0       | 41        | 66,1    | 74,5          | 74,5               |
| 1,0            | 14        | 22,6    | 25,5          | 100,0              |
| Total          | 55        | 88,7    | 100,0         |                    |
| Missing System | 7         | 11,3    |               |                    |
| Total          | 62        | 100,0   |               |                    |

**Fever**

|          | Frequency | Percent | Valid Percent | Cumulative Percent |
|----------|-----------|---------|---------------|--------------------|
| Valid ,0 | 36        | 58,1    | 58,1          | 58,1               |
| 1,0      | 26        | 41,9    | 41,9          | 100,0              |
| Total    | 62        | 100,0   | 100,0         |                    |

**Empirical Antipseudomonic Treatment**

|           | Frequency | Percent | Valid Percent | Cumulative Percent |
|-----------|-----------|---------|---------------|--------------------|
| Valid ,00 | 38        | 61,3    | 61,3          | 61,3               |
| 1,00      | 24        | 38,7    | 38,7          | 100,0              |
| Total     | 62        | 100,0   | 100,0         |                    |

**Empirical Antipseudomonic Bitherapy**

|           | Frequency | Percent | Valid Percent | Cumulative Percent |
|-----------|-----------|---------|---------------|--------------------|
| Valid ,00 | 59        | 95,2    | 95,2          | 95,2               |
| 1,00      | 3         | 4,8     | 4,8           | 100,0              |
| Total     | 62        | 100,0   | 100,0         |                    |

**Antibiotic Bitherapy**

|           | Frequency | Percent | Valid Percent | Cumulative Percent |
|-----------|-----------|---------|---------------|--------------------|
| Valid ,00 | 48        | 77,4    | 77,4          | 77,4               |
| 1,00      | 14        | 22,6    | 22,6          | 100,0              |
| Total     | 62        | 100,0   | 100,0         |                    |

**Multiresistant Pseudomonas**

|                | Frequency | Percent | Valid Percent | Cumulative Percent |
|----------------|-----------|---------|---------------|--------------------|
| Valid ,0       | 44        | 71,0    | 77,2          | 77,2               |
| 1,0            | 13        | 21,0    | 22,8          | 100,0              |
| Total          | 57        | 91,9    | 100,0         |                    |
| Missing System | 5         | 8,1     |               |                    |
| Total          | 62        | 100,0   |               |                    |

**Charlson Index>2**

|                | Frequency | Percent | Valid Percent | Cumulative Percent |
|----------------|-----------|---------|---------------|--------------------|
| Valid ,00      | 23        | 37,1    | 38,3          | 38,3               |
| 1,00           | 37        | 59,7    | 61,7          | 100,0              |
| Total          | 60        | 96,8    | 100,0         |                    |
| Missing System | 2         | 3,2     |               |                    |
| Total          | 62        | 100,0   |               |                    |

**Nosocomial and Healthcare Associated**

|                | Frequency | Percent | Valid Percent | Cumulative Percent |
|----------------|-----------|---------|---------------|--------------------|
| Valid ,00      | 14        | 22,6    | 23,3          | 23,3               |
| 1,00           | 46        | 74,2    | 76,7          | 100,0              |
| Total          | 60        | 96,8    | 100,0         |                    |
| Missing System | 2         | 3,2     |               |                    |
| Total          | 62        | 100,0   |               |                    |

**Age>65 years**

|           | Frequency | Percent | Valid Percent | Cumulative Percent |
|-----------|-----------|---------|---------------|--------------------|
| Valid ,00 | 12        | 19,4    | 19,4          | 19,4               |
| 1,00      | 50        | 80,6    | 80,6          | 100,0              |
| Total     | 62        | 100,0   | 100,0         |                    |

**Age>75 years**

|           | Frequency | Percent | Valid Percent | Cumulative Percent |
|-----------|-----------|---------|---------------|--------------------|
| Valid ,00 | 26        | 41,9    | 41,9          | 41,9               |
| 1,00      | 36        | 58,1    | 58,1          | 100,0              |
| Total     | 62        | 100,0   | 100,0         |                    |

**Severe Sepsis/Septic Shock**

|           | Frequency | Percent | Valid Percent | Cumulative Percent |
|-----------|-----------|---------|---------------|--------------------|
| Valid ,00 | 57        | 91,9    | 91,9          | 91,9               |
| 1,00      | 5         | 8,1     | 8,1           | 100,0              |
| Total     | 62        | 100,0   | 100,0         |                    |

**Chronic Kidney Disease (mild)**

|           | Frequency | Percent | Valid Percent | Cumulative Percent |
|-----------|-----------|---------|---------------|--------------------|
| Valid ,00 | 52        | 83,9    | 83,9          | 83,9               |
| 1,00      | 10        | 16,1    | 16,1          | 100,0              |
| Total     | 62        | 100,0   | 100,0         |                    |

**Charlson Index>3**

|         |        | Frequency | Percent | Valid Percent | Cumulative Percent |
|---------|--------|-----------|---------|---------------|--------------------|
| Valid   | ,00    | 30        | 48,4    | 50,0          | 50,0               |
|         | 1,00   | 30        | 48,4    | 50,0          | 100,0              |
|         | Total  | 60        | 96,8    | 100,0         |                    |
| Missing | System | 2         | 3,2     |               |                    |
| Total   |        | 62        | 100,0   |               |                    |

**Inadequated Definitive Antibiotic Treatment**

|         |        | Frequency | Percent | Valid Percent | Cumulative Percent |
|---------|--------|-----------|---------|---------------|--------------------|
| Valid   | ,0     | 45        | 72,6    | 75,0          | 75,0               |
|         | 1,0    | 15        | 24,2    | 25,0          | 100,0              |
|         | Total  | 60        | 96,8    | 100,0         |                    |
| Missing | System | 2         | 3,2     |               |                    |
| Total   |        | 62        | 100,0   |               |                    |

NOTE: 0 means no, 1 means yes in the frequency tables
