# Supplementary material for: Pseudomonas aeruginosa urinary tract infections in hospitalized patients: Mortality and prognostic factors
Source: PLoS One. 2017 May 26;12(5):e0178178. doi: 10.1371/journal.pone.0178178 (PMC5446154; doi:10.1371/journal.pone.0178178)
Supplement: S2 File — (PDF) [file pone.0178178.s002.pdf]

# MULTIVARIATE ANALYSIS (COX REGRESSION)

Case Processing Summary

|                             |                                                       | N  | Percent |
|-----------------------------|-------------------------------------------------------|----|---------|
| Cases available in analysis | Event <sup>a</sup>                                    | 11 | 17,7%   |
|                             | Censored                                              | 47 | 75,8%   |
|                             | Total                                                 | 58 | 93,5%   |
| Cases dropped               | Cases with missing values                             | 4  | 6,5%    |
|                             | Cases with negative time                              | 0  | 0,0%    |
|                             | Censored cases before the earliest event in a stratum | 0  | 0,0%    |
|                             | Total                                                 | 4  | 6,5%    |
| Total                       |                                                       | 62 | 100,0%  |

a. Dependent Variable: Supervivencia\_días\_primer\_mes

## Block 0: Beginning Block

Variables not in the Equation<sup>a</sup>

|                                             | Score  | df | Sig. |
|---------------------------------------------|--------|----|------|
| Advanced Chronic Liver Disease              | 19,212 | 1  | ,000 |
| Diabetes Mellitus                           | 3,813  | 1  | ,051 |
| Chronic Kidney Disease                      | 6,991  | 1  | ,008 |
| Inadequated Definitive Antibiotic Treatment | 6,723  | 1  | ,010 |
| Severe Sepsis/Septic Shock                  | 9,154  | 1  | ,002 |
| Charlson Index>3                            | 6,027  | 1  | ,014 |

a. Residual Chi Square = 40,067 with 6 df Sig. = ,000

## Block 1: Method = Forward Stepwise (Wald)

Omnibus Tests of Model Coefficients<sup>e</sup>

| Step           | -2 Log Likelihood | Overall (score) |    |      | Change From Previous Step |    |      | Change From Previous |    |
|----------------|-------------------|-----------------|----|------|---------------------------|----|------|----------------------|----|
|                |                   | Chi-square      | df | Sig. | Chi-square                | df | Sig. | Chi-square           | df |
| 1 <sup>a</sup> | 80,673            | 19,212          | 1  | ,000 | 6,709                     | 1  | ,010 | 6,709                | 1  |
| 2 <sup>b</sup> | 73,334            | 27,746          | 2  | ,000 | 7,340                     | 1  | ,007 | 14,048               | 2  |
| 3 <sup>c</sup> | 68,451            | 33,021          | 3  | ,000 | 4,882                     | 1  | ,027 | 18,931               | 3  |
| 4 <sup>d</sup> | 64,545            | 35,488          | 4  | ,000 | 3,906                     | 1  | ,048 | 22,837               | 4  |

Omnibus Tests of Model Coefficients<sup>e</sup>

| Step           | Change ... |
|----------------|------------|
|                | Sig.       |
| 1 <sup>a</sup> | ,010       |
| 2 <sup>b</sup> | ,001       |
| 3 <sup>c</sup> | ,000       |
| 4 <sup>d</sup> | ,000       |

- a. Variable(s) Entered at Step Number 1: Advanced Chronic Liver Disease
- b. Variable(s) Entered at Step Number 2: Chronic Kidney Disease
- c. Variable(s) Entered at Step Number 3: Inadequated Definitive Antibiotic Treatment
- d. Variable(s) Entered at Step Number 4: Diabetes Mellitus
- e. Beginning Block Number 1. Method = Forward Stepwise (Wald)

Variables in the Equation

|        |                                             | B     | SE    | Wald   | df | Sig. | Exp(B) | 95,0% CI |
|--------|---------------------------------------------|-------|-------|--------|----|------|--------|----------|
|        |                                             |       |       |        |    |      |        | Lower    |
| Step 1 | Advanced Chronic Liver Disease              | 2,817 | ,874  | 10,377 | 1  | ,001 | 16,720 | 3,013    |
| Step 2 | Advanced Chronic Liver Disease              | 3,510 | ,958  | 13,412 | 1  | ,000 | 33,453 | 5,112    |
|        | Chronic Kidney Disease                      | 1,882 | ,672  | 7,843  | 1  | ,005 | 6,569  | 1,759    |
| Step 3 | Advanced Chronic Liver Disease              | 4,082 | 1,039 | 15,431 | 1  | ,000 | 59,246 | 7,730    |
|        | Chronic Kidney Disease                      | 1,424 | ,703  | 4,104  | 1  | ,043 | 4,154  | 1,047    |
|        | Inadequated Definitive Antibiotic Treatment | 1,578 | ,740  | 4,544  | 1  | ,033 | 4,846  | 1,136    |
| Step 4 | Advanced Chronic Liver Disease              | 4,349 | 1,137 | 14,642 | 1  | ,000 | 77,410 | 8,343    |
|        | Diabetes Mellitus                           | 1,300 | ,659  | 3,893  | 1  | ,048 | 3,669  | 1,009    |
|        | Chronic Kidney Disease                      | 1,424 | ,688  | 4,283  | 1  | ,039 | 4,154  | 1,078    |
|        | Inadequated Definitive Antibiotic Treatment | 1,926 | ,746  | 6,671  | 1  | ,010 | 6,863  | 1,591    |

Variables in the Equation

|        |                                             | 95,0% CI ... |
|--------|---------------------------------------------|--------------|
|        |                                             | Upper        |
| Step 1 | Advanced Chronic Liver Disease              | 92,791       |
| Step 2 | Advanced Chronic Liver Disease              | 218,924      |
|        | Chronic Kidney Disease                      | 24,527       |
| Step 3 | Advanced Chronic Liver Disease              | 454,075      |
|        | Chronic Kidney Disease                      | 16,471       |
|        | Inadequated Definitive Antibiotic Treatment | 20,678       |
| Step 4 | Advanced Chronic Liver Disease              | 718,216      |
|        | Diabetes Mellitus                           | 13,345       |
|        | Chronic Kidney Disease                      | 16,004       |
|        | Inadequated Definitive Antibiotic Treatment | 29,599       |

Variables not in the Equation<sup>a,b,c,d</sup>

|        |                                             | Score  | df | Sig. |
|--------|---------------------------------------------|--------|----|------|
| Step 1 | Diabetes Mellitus                           | 3,383  | 1  | ,066 |
|        | Chronic Kidney Disease                      | 10,423 | 1  | ,001 |
|        | Inadequated Definitive Antibiotic Treatment | 10,387 | 1  | ,001 |
|        | Severe Sepsis/Septic Shock                  | 2,057  | 1  | ,152 |
|        | Charlson Index>3                            | 4,179  | 1  | ,041 |
| Step 2 | Diabetes Mellitus                           | 1,804  | 1  | ,179 |
|        | Inadequated Definitive Antibiotic Treatment | 5,276  | 1  | ,022 |
|        | Severe Sepsis/Septic Shock                  | 2,261  | 1  | ,133 |
|        | Charlson Index>3                            | 1,141  | 1  | ,285 |
| Step 3 | Diabetes Mellitus                           | 4,330  | 1  | ,037 |
|        | Severe Sepsis/Septic Shock                  | 1,818  | 1  | ,178 |
|        | Charlson Index>3                            | 1,159  | 1  | ,282 |
| Step 4 | Severe Sepsis/Septic Shock                  | 2,280  | 1  | ,131 |
|        | Charlson Index>3                            | ,747   | 1  | ,387 |

- a. Residual Chi Square = 24,873 with 5 df Sig. = ,000  
b. Residual Chi Square = 13,862 with 4 df Sig. = ,008  
c. Residual Chi Square = 9,409 with 3 df Sig. = ,024  
d. Residual Chi Square = 4,900 with 2 df Sig. = ,086

Covariate Means

|                                             | Mean |
|---------------------------------------------|------|
| Advanced Chronic Liver Disease              | ,034 |
| Diabetes Mellitus                           | ,310 |
| Chronic Kidney Disease                      | ,190 |
| Inadequated Definitive Antibiotic Treatment | ,259 |
| Severe Sepsis/Septic Shock                  | ,086 |
| Charlson Index>3                            | ,483 |
